# Supplementary material
Source: PubMed Central journal article supplement (PMC4106412)
Supplement: NIHMS587670-supplement-1.pdf [file NIHMS587670-supplement-1.pdf]

Elsevier Editorial System(tm) for Microbial Pathogenesis  
Manuscript Draft

Manuscript Number: YMPAT-D-13-00184R2

Title: Transport Proteins Promoting E. coli Pathogenesis

Article Type: Original Research Paper

Keywords: E. coli, pathogenesis; transporters; toxins; protein secretion; iron acquisition; intra- versus extracellular pathogens

Corresponding Author: Mr. Fengyi Tang, B.S.

Corresponding Author's Institution: University of California, San Diego

First Author: Fengyi Tang, B.S.

Order of Authors: Fengyi Tang, B.S.; Milton H Saier, Jr., Ph.D.

Abstract: *Escherichia coli* is a genetically diverse species infecting hundreds of millions of people worldwide annually. We examined seven well-characterized *E. coli* pathogens causing urinary tract infections, gastroenteritis, pyelonephritis and haemorrhagic colitis. Their transport proteins were identified and compared with each other and a non-pathogenic *E. coli* K12 strain to identify transport proteins related to pathogenesis. Each pathogen possesses a unique set of protein secretion systems for export to the cell surface or for injecting effector proteins into host cells. Pathogens have increased numbers of iron siderophore receptors and ABC iron uptake transporters, but the numbers and types of low-affinity secondary iron carriers were uniform in all strains. The presence of outer membrane iron complex receptors and high-affinity ABC iron uptake systems correlated, suggesting co-evolution. Each pathovar encodes a different set of pore-forming toxins and virulence-related outer membrane proteins lacking in K12. Intracellular pathogens proved to have a characteristically distinctive set of nutrient uptake porters, different from those of extracellular pathogens. The results presented in this report provide information about transport systems relevant to various types of *E. coli* pathogenesis that can be exploited in future basic and applied studies.

\*Highlights (for review)

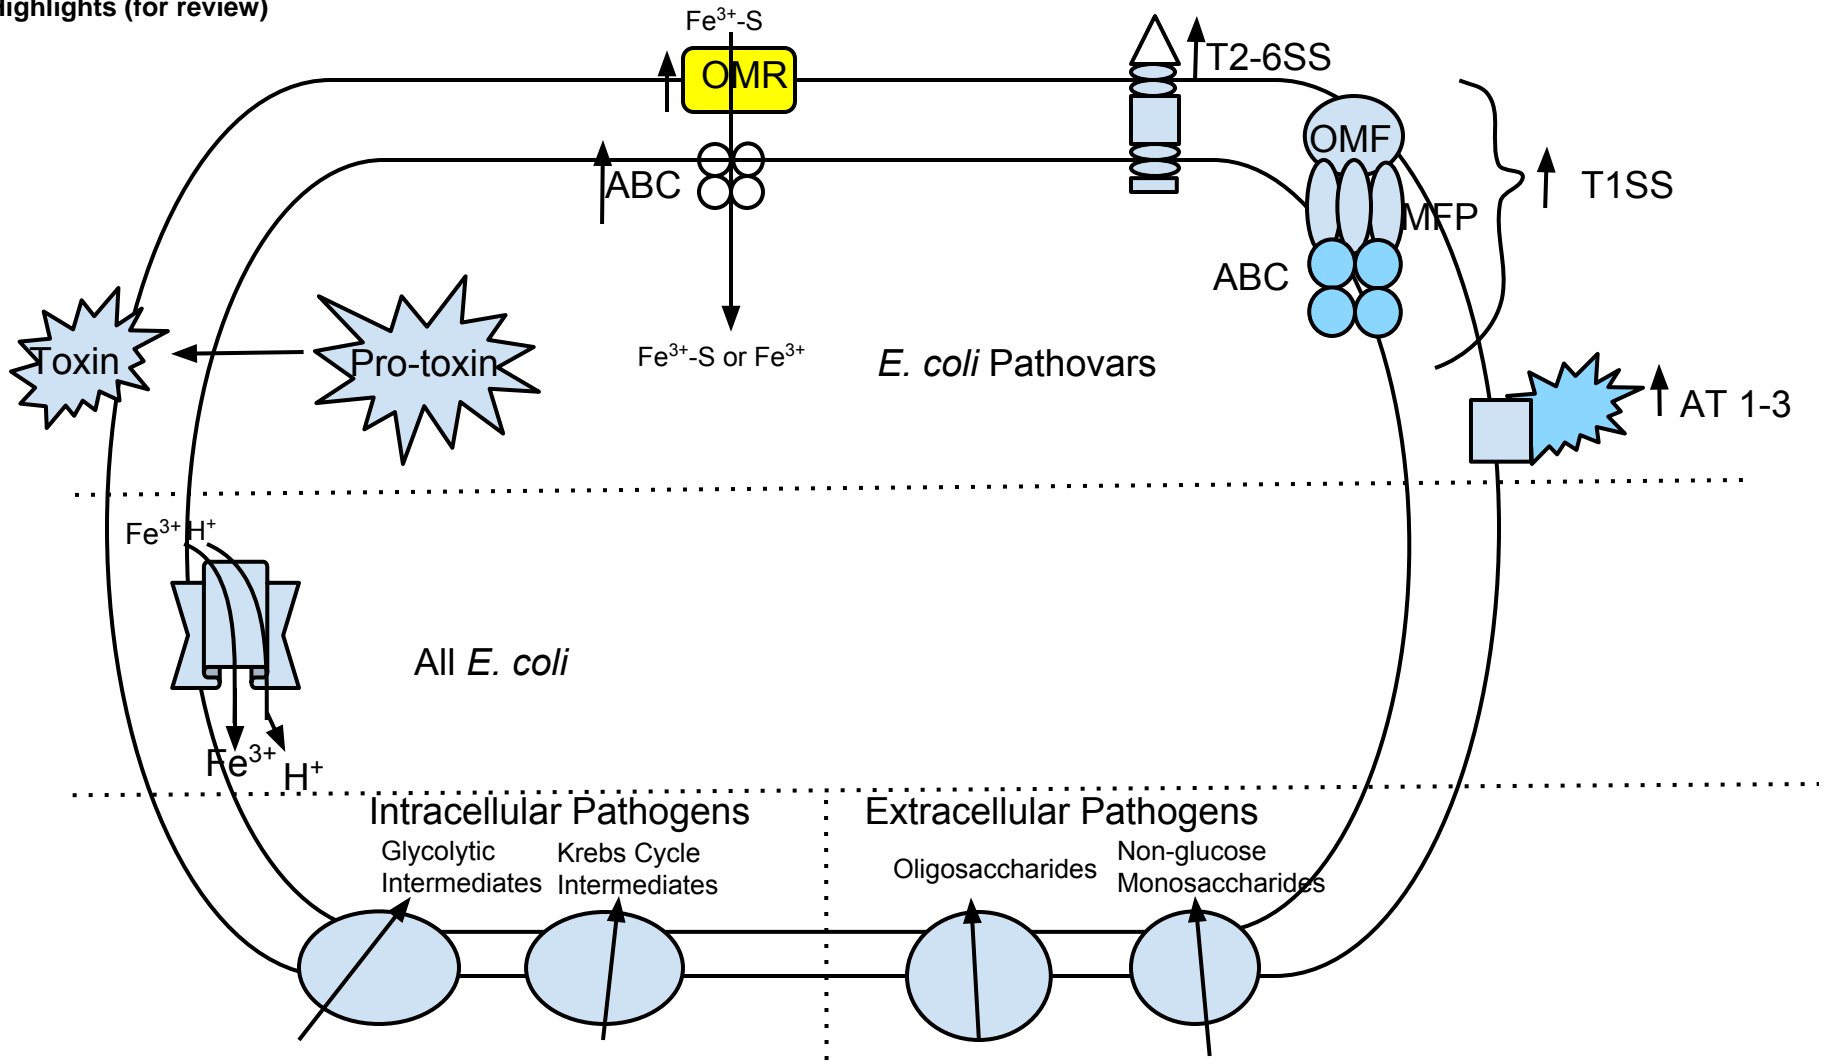

- Each *E. coli* pathogen have an unique set of pore-forming toxins.
- Each pathogen has an unique set of transenvelope and outer membrane protein secretion systems.
- Pathogens have increased numbers of iron siderophore receptors and high affinity ABC uptake porters, and the two increase in parallel to promote pathogenesis.
- Low affinity iron uptake systems are present in invariant numbers and serve housekeeping functions unrelated to pathogenesis.
- Distinct nutrient uptake systems are present in intra- vs. extracellular pathovars, and these may serve as diagnostic tools in medicine.

1  
2  
3  
4 **Transport Proteins Promoting *E. coli* Pathogenesis**  
5  
6  
7

8  
9  
10  
11  
12  
13  
14 **Fengyi Tang and Milton H. Saier Jr.<sup>1</sup>**  
15  
16  
17

18  
19  
20  
21 Department of Molecular Biology  
22  
23 Division of Biological Sciences, University of California at San Diego  
24  
25  
26 La Jolla, CA 92093-0116  
27  
28  
29

30  
31  
32  
33 <sup>1</sup> Corresponding Author:  
34

35  
36 Telephone: (858) 534-4084  
37

38 Fax: (858) 534-7108  
39

40 E-mail: [msaier@ucsd.edu](mailto:msaier@ucsd.edu)  
41

42  
43 Fengyi Tang:  
44

45 Telephone: (408) 507-2686  
46

47 E-mail: [ftang@ucsd.edu](mailto:ftang@ucsd.edu)  
48  
49  
50  
51  
52

53 Key words: *E. coli*, pathogenesis, transporters, toxins, protein secretion, iron acquisition, intra-  
54  
55 versus extracellular pathogens  
56  
57  
58  
59  
60  
61  
62  
63  
64  
65

1  
2  
3  
4  
5  
6 ABSTRACT  
7  
8  
9

---

10  
11 ***Escherichia coli* is a genetically diverse species infecting hundreds of millions of people**  
12  
13 **worldwide annually. We examined seven well-characterized *E. coli* pathogens causing**  
14  
15 **urinary tract infections, gastroenteritis, pyelonephritis and haemorrhagic colitis. Their**  
16  
17 **transport proteins were identified and compared with each other and a non-pathogenic *E.***  
18  
19 ***coli* K12 strain to identify transport proteins related to pathogenesis. Each pathogen**  
20  
21 **possesses a unique set of protein secretion systems for export to the cell surface or for**  
22  
23 **injecting effector proteins into host cells. Pathogens have increased numbers of iron**  
24  
25 **siderophore receptors and ABC iron uptake transporters, but the numbers and types of**  
26  
27 **low-affinity secondary iron carriers were uniform in all strains. The presence of outer**  
28  
29 **membrane iron complex receptors and high-affinity ABC iron uptake systems correlated,**  
30  
31 **suggesting co-evolution. Each pathovar encodes a different set of pore-forming toxins and**  
32  
33 **virulence-related outer membrane proteins lacking in K12. Intracellular pathogens proved**  
34  
35 **to have a characteristically distinctive set of nutrient uptake porters, different from those**  
36  
37 **of extracellular pathogens. The results presented in this report provide information about**  
38  
39 **transport systems relevant to various types of *E. coli* pathogenesis that can be exploited in**  
40  
41 **future basic and applied studies.**  
42  
43  
44  
45  
46  
47  
48  
49  
50  
51  
52  
53  
54  
55  
56  
57  
58  
59  
60  
61  
62  
63  
64  
65

1  
2  
3  
4 **1. Introduction**  
5

6 *E. coli* is a major source of infant mortality, adult diarrhoea and urinary tract infections  
7  
8 worldwide [1] [2]. Uropathogenic strains are responsible for up to 80% of urinary tract infections  
9 (UTIs) and a majority of pyelonephritis cases [3]. Enterotoxigenic and enterotoxic pathogens  
10 have been the leading causes of travellers' diarrhoea, which has significantly contributed to  
11 infant mortality [4]. Enterohaemorrhagic serotypes are currently the leading cause of  
12 haemorrhagic colitis which can lead to fatalities [5].  
13  
14  
15  
16  
17  
18  
19  
20

21 Some probiotic strains of *E. coli* including the *E. coli* Nissle and O83 strains contribute  
22 beneficially to human physiology [7, 8]. Current research on probiotic *E. coli* in humans has  
23 proven to be clinically useful in the treatment of colitis and inflammatory bowel disease (IBD)  
24 syndromes and in combating pathogenic *E. coli* strains [9,10]. *E. coli* can have tremendously  
25 varied effects on humans and other animals, a consequence of its genetic diversity.  
26  
27  
28  
29  
30  
31  
32

33 Prominent types of *E. coli* pathogens have been identified based on varying mechanisms  
34 of infection. There are five types of diarrhoeagenic strains that pertain specifically to the  
35 alimentary system: enteropathogenic (EPEC), enterohaemorrhagic (EHEC), enterotoxigenic (ETEC),  
36 enteroinvasive (EIEC), and enterotoxigenic (EAEC). Diffusely adherent (DAEC) strains can  
37 infect both the urinary tract and the gastrointestinal tract due in part to their diverse mechanisms  
38 of host adhesion [6]. In our study, seven representative *E. coli* pathogens as well as *E. coli* K12  
39 were examined. We use the first three letters/numbers of these strain designations as  
40 abbreviations to refer to these strains. Table 1 presents these abbreviations as well as basic  
41 information about the eight strains of *E. coli* examined.  
42  
43  
44  
45  
46  
47  
48  
49  
50  
51  
52  
53  
54

55 The general paradigm of the pathogenic mechanism associated with *E. coli* virulence  
56 involves (1) adhesion, (2) protein injection into host cells, (3) subversion of signaling  
57  
58  
59  
60  
61  
62  
63  
64  
65

1  
2  
3  
4 mechanisms and (4) colonization leading to impaired immune responses, membrane potential  
5  
6 disruption and cytoskeletal manipulation [11]. During the injection stage, *E. coli* typically  
7  
8 secretes effectors into host cells using one or more protein secretion systems, either to escape the  
9  
10 immune response or to alter signaling pathways. Host membrane potential disruption and  
11  
12 apoptosis induction are employed by several pathovars.  
13  
14

15  
16 Virulence genes are often clustered in “pathogenicity islands” that reflect horizontal  
17  
18 transfer [13]. Horizontal gene transfer has allowed *E. coli* to survive under a variety of *in vivo*  
19  
20 conditions, increasing the virulence of existing pathogens and creating new ones [14]; [15].  
21  
22 Because the pan genome of *E. coli* far exceeds the core genome, perhaps by as much as 20-fold  
23  
24 [16], this increase in genetic plasticity allows for fluctuations in gene content, further  
25  
26 contributing to divergence of *E. coli* pathogenic mechanisms [17].  
27  
28  
29  
30  
31

## 32 33 **2. Methods**

### 34 35 *2.1. G-BLAST search of E. coli proteomes*

36  
37 The proteomes of eight *E. coli* strains were screened for homologues of all proteins  
38  
39 contained in the Transporter Classification Database (TCDB; [www.tcdb.org](http://www.tcdb.org)) as of September,  
40  
41 2012 using a program designed for this purpose, G-BLAST [18]. The program retrieves  
42  
43 information for both the genome query and the TC top hit sequences, TC#, protein size in  
44  
45 number of amino acyl residues, number of predicted TMSs using the HMMTop 2.0 Program, e-  
46  
47 value for the query and hit proteins, regions of sequence similarity and regions of TMS overlap.  
48  
49 FASTA-formatted protein sequences from the completed genome were used. Each putative  
50  
51 open-reading frame was used as a query in the BLASTP software to search for homologous  
52  
53 proteins in TCDB. The low complexity filter was not used as it is normally of value only for  
54  
55 larger datasets including proteins with multiple repeat elements. In addition, each open reading  
56  
57  
58  
59  
60  
61  
62  
63  
64  
65

1  
2  
3  
4 frame [19] was scanned with the HMMTOP 2.0 program [20] to predict the number of putative  
5 transmembrane segments (TMSs). The Web-based Hydrophathy, Amphipathicity and Topology  
6 (WHAT) program [21] was used with a window size of 19 residues and an angle of 100 degrees  
7 to display the hydrophathy plot for individual proteins in order to resolve the differences in the  
8 numbers of TMSs between the proteins retrieved and their TCDB homologues. The plot  
9 generated by WHAT allows the user to judge if a program such as HMMTOP has missed a TMS  
10 or has predicted a TMS inappropriately. A cut-off value of 0.0001 was used with the G-BLAST  
11 program so proteins retrieved with larger values (greater sequence divergence) were not  
12 recorded. Proteins with no predicted TMSs were eliminated so that only integral membrane  
13 proteins, primarily multispinning membrane proteins, were retrieved. Proteins with only an N-  
14 terminal signal sequence are numerous because these proteins include almost all periplasmic,  
15 outer membrane and secreted proteins that are exported via the general secretory pathway (Sec)  
16 or twin arginine translocase (TAT). The topological prediction programs often miss these TMSs,  
17 recording them to have zero TMSs. Consequently, the numbers retrieved were not reliable and  
18 were therefore not always recorded. For example, single TMS proteins such as extracytoplasmic  
19 solute binding receptors of ABC transport systems were often predicted to lack a TMS, and  
20 therefore these proteins were not included in our study of the integral membrane transport  
21 proteins.

## 22 23 24 25 26 27 28 29 30 31 32 33 34 35 36 37 38 39 40 41 42 43 44 45 46 47 48 49 *2.2. Identification of distant transport protein homologs*

50  
51  
52 Proteins retrieved between the values of 0.0001 and 0.1 were examined manually to  
53 determine the likelihood that these proteins were members of recognized transport protein  
54 families, or if they might comprise representatives of novel families of putative transport  
55 proteins. A total of 82 non-orthologous homologous proteins were retrieved using the 0.0001 to  
56  
57  
58  
59  
60  
61  
62  
63  
64  
65



1  
2  
3  
4 0.1 cutoff, but only 10 proved to be recognizable transport proteins. These were incorporated  
5  
6 into TCDB. The 10 proteins were manually examined by conducting searches as follows. (1) TC-  
7  
8 BLAST searches provided preliminary evidence for family assignment. (2) NCBI BLAST  
9  
10 searches provided confirmation or refutation of family assignment based on the conserved  
11  
12 domain database (CDD) and hits obtained with values to the query sequence of less than  $1 \times 10^{-7}$ .  
13  
14 (3) Topological analyses revealed similarities and differences between the query sequence and  
15  
16 members of the assigned family. (4) Proteins proving to represent new potential families were  
17  
18 included in TC subclass 9.B.  
19  
20  
21  
22  
23

24 Candidate proteins were subsequently examined in greater detail to estimate their  
25  
26 substrate specificities. On the basis of the numbers and locations of TMSs as well as degrees of  
27  
28 sequence similarity with entries of known function in TCDB, transport proteins were classified  
29  
30 into families and subfamilies of homologous transporters according to the classification system  
31  
32 presented in TCDB. Regions of sequence similarity were examined using the WHAT program  
33  
34 which shows hydropathy plots to ensure that homology was in a transmembrane region of 3 or  
35  
36 more TMSs and not only in hydrophilic domains. Proteins encoded within single multi-cistronic  
37  
38 operons were often identified in order to gain evidence for multicomponent systems and to help  
39  
40 deduce functions. Operon analyses (genome context, a.k.a., synteny analyses) were performed  
41  
42 for candidate proteins with assigned or unassigned transport functions as described in Castillo  
43  
44 and Saier (2010) and Reddy et al. (2012) [22] and [23].  
45  
46  
47  
48  
49  
50  
51

### 52 *2.3. Overview of programs used*

53  
54

55 Transport proteins thus obtained were systematically analyzed for unusual properties  
56  
57 using published [18] and unpublished in-house software. Among the programs described by  
58  
59 Reddy and Saier [18], used in this report, were the GSAT, Protocol1, Protocol2, TSSearch,  
60  
61  
62  
63  
64  
65

1  
2  
3  
4 SSearch and GBlast programs. Unpublished software was used to tabulate information according  
5  
6 to TC# or other criteria such as substrate type. Unusual characteristics of the query *E. coli*  
7  
8 sequences were identified based in part on topologies that differed from corresponding family  
9  
10 members in TCDB as well as e-values obtained with G-BLAST. Unusual properties can result  
11  
12 from events such as genetic deletion and fusion, sometimes resulting in the gain or loss of extra  
13  
14 domains or the generation of multifunctional proteins. Such results can be reflective of the actual  
15  
16 protein sequence, but they can also be artifactual, due to sequencing errors or incorrect initiation  
17  
18 codon assignment. In the latter cases, but not the former, the protein sequences were either  
19  
20 corrected when possible or eliminated from our study.  
21  
22  
23  
24  
25  
26

27 Orthologous relationships among homologues were estimated by measuring the percent  
28  
29 identities. We initially used an arbitrary cutoff of 95% identity, a value appropriate in view of the  
30  
31 similarities of the strains considered. Homologues with lower percent identities were examined  
32  
33 manually, revealing occasional sets of orthologs that exhibited less than 95% identity (See Table  
34  
35 S1 for orthologous assignments).  
36  
37  
38  
39

### 40 **3. Results**

#### 41 *3.1 Overview of Transporter Types*

42  
43 According to the transporter classification system, there are five defined classes of  
44  
45 transport systems (classes 1-5) as well as a class of transporter auxiliary proteins (class 8) and a  
46  
47 class of incompletely defined transporters (class 9). These will be considered in sequence.  
48  
49  
50  
51  
52  
53

##### 54 *3.1.1 Pore-forming Proteins*

55  
56 Eight *E. coli* genomes were analyzed for the occurrence of transport proteins using the  
57  
58 Transporter Classification Database (TCDB; [www.tcdb.org](http://www.tcdb.org), [24]) and the G-Blast program [18].  
59  
60  
61  
62  
63  
64  
65

1  
2  
3  
4 The results are summarized according to TC subclass in Table 2 and Table S1. Examining the  
5 total number of transport proteins present in these 8 genomes, we see that *E. coli* K12 has the  
6  
7 fewest at 1128. The most found in any genome is 1287, 159 more than in K12. However, the  
8  
9 seven pathogenic species combined contained 838 unique transport proteins lacking in K12.  
10  
11  
12

13  
14 TC subclass 1.A in TCDB includes  $\alpha$ -type channels. The eight strains have 37-42 such  
15  
16 channel proteins. Surprisingly, however, the pathogenic organisms possess 24 non-orthologous  
17  
18 channel proteins lacking in K12 (Table 2). It appears unlikely that  $\alpha$ -type channels are major  
19  
20 contributors to *E. coli* pathogenesis.  
21  
22

23  
24 TC subclass 1.B includes outer membrane  $\beta$ -type porins. In this subclass, we find striking  
25  
26 differences between the organisms, where K12 has far fewer than any of the other strains. The  
27  
28 largest number of these porins is 108 observed in ABU, and the seven pathogens possess 151  
29  
30 porin proteins non-orthologous to those in K12 (Table 2). This observation suggests that porins  
31  
32 contribute to pathogenesis as confirmed and explained below.  
33  
34

35  
36 TC subclass 1.C includes pore-forming toxins. K12 has only nine such proteins, and E24  
37  
38 has just two more, but all the others have between 15-20 such toxins, and 51 toxins, non-  
39  
40 orthologous to those in K12, were identified (Table 2). As expected, an array of toxins  
41  
42 characterizes each of the pathogens. It should be noted that toxins that do not form  
43  
44 transmembrane pores were not included in our study.  
45  
46  
47

48  
49 Small  $\alpha$ -type channel-forming holins (TC subclass 1.E.) function in release of auto-lysins  
50  
51 which allow phage particle release when phage-encoded, or self-destruction by a suicide-type  
52  
53 process when chromosomally encoded [18]. The *E. coli* strains have 3-7 holins each. However,  
54  
55 19 of these proteins are non-orthologous to those found in K12 (Table 2). It is possible therefore  
56  
57 that chromosomally encoded holins play important roles in pathogenicity, possibly in  
58  
59  
60  
61  
62  
63  
64  
65

1  
2  
3  
4 programmed cell death as an aid to biofilm formation and communal life ([25]; [26]; [27]).  
5  
6  
7

### 8 9 *3.1.2 Secondary Carriers*

10  
11 The largest number of transport systems, but not the largest number of transport proteins,  
12 includes secondary carriers belonging to TC subclass 2.A. The eight strains have anywhere from  
13 309 to 325 such systems. K12 has 311, and 96 proteins non-orthologous to those in K12 were  
14 identified, many of which are likely to contribute to specific types of pathogenicity.  
15  
16  
17  
18  
19  
20  
21  
22

### 23 *3.1.3 Primary Active Transporters*

24  
25 TC subclass 3.A are pyrophosphate-hydrolysis driven primary active transporters, usually  
26 multi-component systems. K12 has the fewest such systems (340), while UMN has the most  
27 (390), and 155 proteins found in pathogens appear to have no orthologs in K12. Many of these  
28 systems play essential roles in virulence. The strains examined have 3-5 decarboxylation driven  
29 sodium pumps, which probably play a housekeeping function in the maintenance of ionic  
30 homeostasis. Subclass 3.D, ion ( $H^+$  or  $Na^+$ )-pumping electron carriers, also exhibit little variation  
31 with only seven proving to be non-orthologous to those of K12.  
32  
33  
34  
35  
36  
37  
38  
39  
40  
41  
42  
43  
44

### 45 *3.1.4 Group Translocators*

46  
47 TC class 4 includes group translocators that modify their substrates during transport.  
48  
49 Subclass 4.A includes the proteins of the multi-component sugar transporting phosphotransferase  
50 system (PTS) [28]. While K12 has the fewest such systems (49), both CFT and ABU have 13  
51 more (62). In fact, 43 PTS proteins proved to be non-orthologous to those found in K12. These  
52 systems, likely to be important virulence factors, will be analyzed below.  
53  
54  
55  
56  
57  
58  
59  
60  
61  
62  
63  
64  
65

1  
2  
3  
4 . Each of the eight different strains has between 7-12 TC subclass 4D group translocating  
5  
6 glycosyl transferases (4.D; [30]; [31]). Interestingly, the pathogens possess eight sets of  
7  
8 orthologs not found in K12, suggesting that unique glycosyl transferases may serve different  
9  
10 functions in the different pathogens. Some of them could function in the production of capsules,  
11  
12 known to be virulence factors in many pathogenic bacteria [32].  
13  
14  
15  
16  
17

### 18 *3.1.5 Transmembrane Electron Carriers*

19  
20  
21 Electron-carriers (TC Class 5) that transfer electrons from one side of the membrane to  
22  
23 the other, thereby influencing cellular energetics [33], do not vary in numbers appreciably  
24  
25 between the eight strains.  
26  
27  
28  
29

### 30 *3.1.7 Poorly Characterized Transporters*

31  
32  
33 Tremendous variation is observed between the numbers of poorly characterized  
34  
35 transporters found in subclass 9.A. K12 has the fewest, with only 42 such proteins while 559 has  
36  
37 over twice this number with 87. Most of the pathogens have between 60-70 such proteins, and 94  
38  
39 of these proteins are lacking in K12. This shows that the pathogens possess large variable  
40  
41 numbers of poorly characterized transporters that are likely to serve highly specific functions  
42  
43 within the cell. It is probable that they remain poorly characterized because they are not found in  
44  
45 *E. coli* K12 and other commonly studied model bacteria. Elucidation of their functions and  
46  
47 mechanisms of action is likely to prove particularly interesting and important for specific aspects  
48  
49 of *E. coli* pathogenesis. In contrast to the situation observed for subclass 9.A, the strains  
50  
51 examined have relatively little variation in the numbers of subclass 9B members. The smallest  
52  
53 number is found in O15 (81), and the largest number is found in CFT (91) with K12 having 90.  
54  
55  
56  
57 Nevertheless, the pathogens collectively have 26 such proteins lacking in K12.  
58  
59  
60  
61  
62  
63  
64  
65

1  
2  
3  
4  
5  
6  
7  
8  
9  
10  
11  
12  
13  
14  
15  
16  
17  
18  
19  
20  
21  
22  
23  
24  
25  
26  
27  
28  
29  
30  
31  
32  
33  
34  
35  
36  
37  
38  
39  
40  
41  
42  
43  
44  
45  
46  
47  
48  
49  
50  
51  
52  
53  
54  
55  
56  
57  
58  
59  
60  
61  
62  
63  
64  
65

### 3.2 Pathogenicity-related Transport Protein Analyses

Transport proteins likely to be important in pathogenicity include (1) toxins, (2) trans-envelope protein secretion systems, (3) outer membrane protein secretion systems, and (4) outer membrane iron-siderophore receptors that function with cytoplasmic membrane ABC-type iron uptake porters. The transport proteins that fall into these four classes are summarized in Tables 3 through 6, respectively.

#### 3.2.1 Toxins identified in *E. coli* strains

Table 3 summarizes the toxins identified in the eight *E. coli* strains included in this study. In addition to the pore-forming subunits that function in conjunction with type III secretion systems (IITCP), seven families of toxins are represented. These will be discussed sequentially according to their TC numbers.

HlyE is a well-characterized toxin found in *E. coli*, *Salmonella* and *Shigella* species. Its high resolution X-ray structure is available, and models of its membrane-inserted homooligomeric pore complex have been proposed [34, 35]. Five of the eight *E. coli* strains examined possess this toxin.

Another haemolysin is the *E. coli* Haemolysin A (HlyA), part of the RTX superfamily of pore-forming proteins [36]. The general mechanism proposed for HlyA is as follows: the toxin (1) recognizes and binds to  $\beta$  2-integrin receptors on host cell membranes, (2) inserts into the host membrane forming nonselective pores, and (3) transports a toxin that inhibits host protein kinase B, leading to apoptosis of the host cell [37]. This toxin was found only in two intracellular strains, both of which have HlyE as well.

1  
2  
3  
4 Type 3 Secretion System (T3SS) pore-forming proteins (IIITCP) are typically involved in  
5  
6 attaching/effacing mechanisms in enteropathogenic strains [16]. The EspB/D complex and other  
7  
8 homologous pore-forming protein pairs are secreted into the host cell and oligomerize to form  
9  
10 translocation pores at the site of contact. EspB with EspD, for example, provide translocation  
11  
12 functions for *E. coli* effector proteins and inhibit host phagocytosis by altering host cell  
13  
14 cytoskeletal functions [38]. IIITCP family proteins were found in two pathovars.  
15  
16  
17

18  
19 The prophage-encoded shiga toxin (Stx) is a heteromeric protein with a glycolipid-  
20  
21 recognizing, pore-forming, pentameric B subunit and a single A chain with N-glycosidase  
22  
23 activity that results in cleavage of a single adenine in the 28S rRNA, resulting in blockage of  
24  
25 protein synthesis [40]. Two StxB pore-forming toxins appear to be encoded in the O15 genome,  
26  
27 although no such toxin was identified in the other strains.  
28  
29  
30

31 Clostridial cytotoxins (CCT) are tripartite proteins with N-terminal catalytic domains, C-  
32  
33 terminal receptor regions and central channel-forming domains [41]. Upon endocytosis into the  
34  
35 host cell, the channel-forming domain is activated by acidic pH which induces conformational  
36  
37 changes promoting insertion into the endosomal membrane, concomitant with channel formation.  
38  
39 The catalytic domain of CCT is translocated across the membrane, resulting in inactivation of  
40  
41 Rho family GTPases and reorganization of the host actin cytoskeleton [42]. Two homologs of  
42  
43 the clostridial cytotoxin were identified (see Table 3).  
44  
45  
46  
47

48 *Serratia* pore-forming toxins (S-PFT) (1.C.75) are exported through a two partner  
49  
50 secretion system (TPS; TC # 1.B.20) [43]. Three organisms possess this type of pore-forming  
51  
52 haemolysin, ABU, CFT and O15. The former two have huge toxins of 3216 amino acids that are  
53  
54 nearly identical. By contrast, the O15 homolog is 1270 amino acids in length and corresponds in  
55  
56 sequence to the N-terminal portion of the larger toxins.  
57  
58  
59  
60  
61  
62  
63  
64  
65

1  
2  
3  
4 Toxins of the Cytolethal Distending Toxin (CDT) family are tripartite protein complexes,  
5  
6 CdtABC, that induce DNA cleavage, cell cycle arrest, and apoptosis in host epithelial and  
7  
8 immune cells [45]. The catalytic subunit of the complex possesses phosphodiesterase activity  
9  
10 that cleaves the host DNA, causing G2/M cell cycle arrest [46]. CdtA and C are dimeric subunits  
11  
12 that deliver CdtB to the host cell cytoplasm [47]. The complete CdtA/B/C trimeric toxin system  
13  
14 (1.C.98.1.1) was found in only one of the eight *E. coli* strains, APE.  
15  
16  
17  
18  
19  
20

### 21 *3.2.2 Trans-envelope Protein Secretion Systems in Pathogenicity*

22

23 Table 4 summarizes the various protein secretion systems present in the *E. coli* strains  
24  
25 examined. These include (1) type I secretion systems (T1SS; ABC; TC#3.A.1), (2) type II  
26  
27 secretion systems (T2SS; SEC-SRP complexes; TC#3.A.5) for secretion across the inner  
28  
29 membrane, acting together with the Main Terminal Branch (MTB; TC# 3.A.15) for secretion  
30  
31 across the outer membrane, (3) type III secretion systems (T3SS; Fla; Path; TC #3.A.6), (4) type  
32  
33 IV secretion systems (T4SS; Conj; Vir; TC# 3.A.7), and (5) type VI secretion systems (T6SS;  
34  
35 TC# 3.A.23) [48].  
36  
37  
38  
39

40 Type I secretion systems (T1SSs) identified are members of the ABC Protein Exporter-1  
41  
42 (TC#3.A.1.109) and Protein Exporter-2 (TC#3.A.1.110) families within the ABC functional  
43  
44 superfamily [49]. ABC exporters consist of two transmembrane domains and two cytosolic ATP-  
45  
46 hydrolyzing domains. T1SS efflux involves ATP hydrolysis-coupled translocation of the  
47  
48 substrate across the two bacterial membranes in a single energy-coupled step, utilizing an outer  
49  
50 membrane factor (OMF; TC#1.B.17) and a membrane fusion protein (MFP; TC#8.A.1) to couple  
51  
52 cytoplasmic membrane transport with that across the periplasm and outer membrane ([50], [51]).  
53  
54 Protein exporter families of this type were found in abundance in the pathovars.  
55  
56  
57  
58  
59  
60  
61  
62  
63  
64  
65



1  
2  
3  
4 Type III secretion systems are found in numerous Gram-negative bacterial strains and are  
5  
6 used for secretion of flagellar and pathogenicity effector proteins. Effector proteins can be  
7  
8 exported across both bacterial membranes as well as the host cell membrane in a single  
9  
10 step. The type III protein secretion system includes a needle complex, the injectisome, which  
11  
12 attaches to the host cell membrane [52, 53, 54, 55]. Several of these systems were present in *E.*  
13  
14  
15  
16 *coli* pathogens (Table 4).  
17

18  
19 As expected, the complete general secretory pathway (TC#2.A.5.1.1) and the complete  
20  
21 flagellar protein export complex (TC #3.A.6.2.1) were found in all strains. The UMN pathovar  
22  
23 appears to possess six additional key components of the flagellar system (Table 4).  
24

25  
26 T4SSs vary tremendously with respect to sequence divergence and numbers of  
27  
28 constituents required for function. An examination of potential T4SS components in the eight *E.*  
29  
30 *coli* strains revealed the presence of potential subunits, suggesting that some of these organisms  
31  
32 utilize this mechanism to promote pathogenesis.  
33  
34

35  
36 Type VI secretion systems are found in multiple Gram-negative bacteria. Key  
37  
38 constituents include an ATPase protein, ClpV, a phage tail-like protein that spans the outer  
39  
40 membrane, and a “tail-spike” protein, VgrG, which penetrates the host membrane and dissociates  
41  
42 from the complex to allow contact-dependent translocation of proteins into the host cell  
43  
44 cytoplasm [59]. In the *E. coli* strains studied here, two sets of complete T6SS complex homologs  
45  
46 were identified (VasA-L of 3.A.23.1.1 and EvpA-P of 3.A.23.2.1) in several strains.  
47  
48  
49  
50

### 51 52 53 *3.2.3 Outer membrane protein secretion systems*

54  
55 Table 5 summarizes the outer membrane protein secretion systems present in the eight *E.*  
56  
57 *coli* strains studied. These include members of the following families: Autotransporter-1  
58  
59  
60  
61  
62  
63  
64  
65

1  
2  
3  
4 (TC#1.B.12), Autotransporter-2 (TC#1.B.40), outer membrane factors (OMF; TC#1.B.17),  
5  
6 fimbrial usher proteins (FUP; TC#1.B.11), two partner secretion systems (TPS; TC#1.B.20),  
7  
8 secretins (TC#1.B.22), outer membrane protein insertion porins (OmpIP; TC#1.B.33), curli fiber  
9  
10 subunits (CsgA; TC#1.B.48), and putative autotransporter-3 (Invasins; TC#1.B.54).  
11  
12

13  
14 Autotransporters are virulence factors that insert into the outer bacterial membrane to  
15  
16 form transmembrane  $\beta$ -barrels that export their extracellular protein domains. An  
17  
18 Autotransporter-1 protein consists of an N-terminal cleavable secretory signal, an exported  
19  
20 passenger domain of variable lengths, and a C-terminal 250-300 amino acid residue domain that  
21  
22 inserts into the outer membrane, giving rise to a 12 TMS  $\beta$ -barrel structure [60].  
23  
24

25  
26 Autotransporter adhesins (e.g., AidA; TC#1.B.12.1.1) were present in all eight *E. coli*  
27  
28 strains examined, but virulence factor-associated autotransporters were present in only certain  
29  
30 pathogens. For example, fibronectin binding proteins and a tracheal colonization factor  
31  
32 autotransporter were identified only in pathovars (Table 5). Overall, the most autotransporter-1  
33  
34 proteins were found in ABU with sixteen homologs; fourteen were found in 559, twelve in CFT  
35  
36 and UMN, ten in APE and E24, eight in O15, and only five in K12.  
37  
38

39  
40 Autotransporter-2 family proteins have trimeric structures organized into three domains:  
41  
42 an N-terminal head that adheres to the host cell membrane, a stalk, and a C-terminal anchor, rich  
43  
44 in glycine, which forms a  $\beta$ -strand domain that oligomerizes to form a pore for auto-transport  
45  
46 [63]. Haemagglutinins, a dissimilar adhesin, YadB [64], and other autotransporter-2 family  
47  
48 members were identified in specific pathovars (Table 5). Interestingly, AT-2 family proteins are  
49  
50 far less prevalent than AT-1 family proteins in all strains and are lacking in K12.  
51  
52

53  
54 Invasins or intimins are also called Autotransporters-3, but a function in autotransport is  
55  
56 not well established [65]. The N-terminal domain serves as an anchor and inserts a pore-like  $\beta$ -  
57  
58  
59  
60  
61  
62  
63  
64  
65

1  
2  
3  
4 barrel in the outer membrane. The C-terminus contains folds that bind to Tir (translocated  
5  
6 intimin receptor) and  $\beta$ -1 integrins on host cells, leading to pathogenesis in enterohaemorrhagic  
7  
8 and enteropathogenic strains [66, 67]. In our study, intimin/invasin proteins were identified  
9  
10 across all serotypes and were found in abundance in six of the seven pathogens. The UPEC  
11  
12 strains have more intimins/invasins than the enteropathogenic strains.  
13  
14

15  
16 Outer membrane factors (OMFs; 1.B.17) and membrane fusion proteins (MFPs; TC#  
17  
18 8.A.1) function with Major Facilitator Superfamily (MFS) type porters, Resistance-Nodulation  
19  
20 Cell-Division [68] family proteins (2.A.6), ATP-Binding Cassette (ABC) porters and Aromatic  
21  
22 Acid Exporters (AAE, TC#2.A.85) to form complexes that export various drugs,  
23  
24 oligosaccharides, proteins, aromatic acids and siderophores across both the inner and outer  
25  
26 membranes in a single energy-coupled step ([69], [70], [71], [72], [73]). OMF proteins form  
27  
28 homotrimeric, 12-stranded  $\beta$ -barrel complexes that form holes in the outer membrane for  
29  
30 translocation. The OMF component, TolC (TC #1.B.17.1.1), was identified in all eight strains.  
31  
32 TolC-dependent exporters mediate translocation of hemolysins, drugs and various siderophores  
33  
34 [74, 75]. Additional TolC-like proteins were found in the pathogens but not in K12.  
35  
36  
37  
38  
39

40  
41 The Fimbrial Usher Proteins of the FUP family function in conjunction with periplasmic  
42  
43 chaperone proteins in fimbrial assembly [76]. The usher proteins contain central domains that  
44  
45 span the outer membrane 24 times to form  $\beta$ -barrel pores. The C-terminal domains act as “plugs”  
46  
47 that lie within the lumen of the  $\beta$ -barrels [77]. These plug domains, along with helical folds,  
48  
49 regulate channel opening and export of proteins that contribute to fimbrial assembly [78]. FUPs  
50  
51 were identified in all strains of *E. coli* but were present in greater numbers in the pathovars  
52  
53  
54  
55 (Table 5).  
56  
57  
58  
59  
60  
61  
62  
63  
64  
65

1  
2  
3  
4 Homologs of a single two-partner secretion (TPS) system (ShlB; TC#1.B.20.1.1) were  
5 identified. The oligomeric  $\beta$ -barrel channel of ShlB serves in secretion of the effector protein  
6 across the outer membrane [80]. These TPS systems were found exclusively in O15, where two  
7 paralogues were present, and in ABU, where a single protein was identified.  
8  
9

10  
11 A Secretin (TC#1.B.22) consists of an N-terminal periplasmic domain and a C-terminal  
12 domain responsible for forming large channels via homomultimeric ring structures [81].  
13  
14 Secretins participate in various transport processes such as fimbrial protein export, T2SS, T3SS,  
15 and phage export [82, 83], and as expected, a number of these were identified in the pathogens  
16 (Table 5). Also as expected, outer membrane protein (OMP) insertion porins (OmpIP or BAM,  
17 TC #1.B.33), required for OMP insertion, were ubiquitously present, and all six required  
18 subunits were identified in all eight strains.  
19  
20  
21  
22  
23  
24  
25  
26  
27  
28  
29  
30  
31  
32

### 3.2.4 Iron Scavenging Outer Membrane Receptors

33 Table 6 lists outer membrane receptors of TC family 1.B.14, most of which are involved  
34 in the uptake of iron-siderophore complexes. This table also includes a cobalamin receptor and a  
35 copper receptor and indicates the occurrence of the TonB protein, which together with other  
36 proteins, is involved in OMR energization. TolA homologs, involved in outer membrane  
37 stabilization and colicin uptake, are also tabulated. For some of the OMRs, a single ortholog was  
38 found in all eight organisms (e.g., receptors for ferric copragen, ferrichrome, catecholate and  
39 cobalamin). Some organisms possess more than one gene encoding a specific type of iron  
40 complex uptake receptor. These include: 1.B.14.1.4 (catecholate) where four of the organisms  
41 have a single gene encoding this system, but three organisms have two, and one (CFT) has three  
42 (Table 6). A similar situation was observed for 1.B.14.7.2, an iron pesticin uptake receptor. Six  
43 additional types of outer membrane receptors specific for iron complexes were found in some of  
44  
45  
46  
47  
48  
49  
50  
51  
52  
53  
54  
55  
56  
57  
58  
59  
60  
61  
62  
63  
64  
65

1  
2  
3  
4 these *E. coli* strains but not others. Similarly, only four of the pathovars possess the copper  
5  
6 receptor (TC#1.B.14.4.1). All in all, each of these organisms possesses nine to fifteen iron uptake  
7  
8 receptors except for K12 and E24, which have only six. Interestingly, the uropathogenic strains  
9  
10 all possess more (ten to fifteen) iron complex receptors than the other serovars.  
11  
12  
13

14 Table 6 also includes the energizing modules of family 2.C.1, TonB, which energizes  
15  
16 OMR-mediated uptake, and TolA, which provides outer membrane stability and mediates colicin  
17  
18 uptake [Table S1; 85]. It can be seen that while *E. coli* K12 has just one of each of these two  
19  
20 proteins, four of the pathogens have two TonB's, five of them have two TolA's, and one (559)  
21  
22 has three TolA's. TonB, but not TolA, associates with ExbB-ExbD or TolQ-TolR to energize  
23  
24 uptake of iron-siderophore complexes and other large molecules across the outer membranes of  
25  
26 Gram-negative bacteria via outer membrane receptors (OMR; TC# 1.B.14; 17370038,  
27  
28 23443998). The dissimilar Tol complex includes six proteins, TolA, TolB, YbgF, Pal and the  
29  
30 pmf-dependent energizer, TolQR. This complex is involved in the maintenance of outer  
31  
32 membrane stability and facilitates late stages of cell division (19075020, 21285349).  
33  
34  
35  
36  
37  
38  
39

### 40 3.2.5 Inner membrane Iron Uptake Systems

41  
42 Table 7 summarizes inner membrane iron uptake systems identified in the eight *E. coli*  
43  
44 strains. These systems function to transport iron from the periplasm into the cytoplasm of the  
45  
46 bacterium, cooperating with the outer membrane iron-scavenging OMR complexes, which  
47  
48 import iron from the surrounding extracellular environment into the periplasm. Various  
49  
50 mechanisms are employed for inner membrane transport of iron/iron-chelate complexes. These  
51  
52 include the CorA heavy metal ion uptake channels (1.A.35), the zinc-iron permeases (ZIP  
53  
54 (2.A.5)), metal ion transporters (Nramp (2.A.55)), GTPase-coupled ferrous iron uptake systems  
55  
56 (FeoB (9.A.8)), and ATP-binding Cassette (ABC (3.A.1)) transporters.  
57  
58  
59  
60  
61  
62  
63  
64  
65

1  
2  
3  
4 Zinc-Iron Porters (ZIP) have about of eight TMSs with histidine-rich repeats near the N-  
5 and C-termini [86]; a cation symport mechanism may be operative [89]. A single such transport  
6 protein was found in each of the eight strains examined (Table 7). Metal ion transporter (Nramp)  
7 homologues generally function by a symport mechanism in a 1:1 ratio of ferrous ion and H<sup>+</sup>  
8 although stoichiometrics have been reported to be variable [90]. A single Nramp protein was  
9 found in each of the eight strains of *E. coli* examined (Table 7). Another iron influx system,  
10 FeoB (TC#9.A.8), has N-terminal catalytic domains with sequences homologous to GTP-binding  
11 domains [91]. Their C-termini catalyze transport, possibly coupled to K<sup>+</sup>-activated GTPase  
12 activity. GTP hydrolysis has been reported to be required for transport, and if there is direct  
13 energy coupling, the mechanism may resemble that of ABC transporters ([92]; [93]; [94]; [95]).  
14 Two FeoB homologues were identified in each of the eight strains of *E. coli*.

15  
16  
17  
18  
19  
20  
21  
22  
23  
24  
25  
26  
27  
28  
29  
30  
31 Four types of inner membrane ABC iron-uptake systems were identified: ferric porters  
32 (TC#3.A.1.10), iron chelate porters (TC#3.A.1.14), manganese/zinc/iron chelate porters  
33 (TC#3.A.1.15), and homologs of the *Brachyspira* iron transporters (TC#3.A.1.20). A complete  
34 four-subunit ferric-citrate uptake system (TC#3.A.1.14.1) was identified in five of the eight  
35 strains. Complete ferric-enterobactin and ferric-hydroxamate uptake systems were identified in  
36 all eight strains of *E. coli* examined. However, a second complete ferric-enterobactin system  
37 (TC#3.A.1.14.2) was identified in two strains.

38  
39  
40  
41  
42  
43  
44  
45  
46  
47  
48 Homologs of the *Shigella* heme uptake system (ShuTUV (3.A.1.14.18)) were present in  
49 five pathogenic strains as complete systems. Complete systems corresponding to the *Salmonella*  
50 Mn<sup>2+</sup> and Fe<sup>2+</sup> uptake system (3.A.1.15.7) were identified in four pathovars.

51  
52  
53  
54  
55  
56  
57  
58  
59  
60  
61  
62  
63  
64  
65  
66  
67  
68  
69  
70  
71  
72  
73  
74  
75  
76  
77  
78  
79  
80  
81  
82  
83  
84  
85  
86  
87  
88  
89  
90  
91  
92  
93  
94  
95  
96  
97  
98  
99  
100  
101  
102  
103  
104  
105  
106  
107  
108  
109  
110  
111  
112  
113  
114  
115  
116  
117  
118  
119  
120  
121  
122  
123  
124  
125  
126  
127  
128  
129  
130  
131  
132  
133  
134  
135  
136  
137  
138  
139  
140  
141  
142  
143  
144  
145  
146  
147  
148  
149  
150  
151  
152  
153  
154  
155  
156  
157  
158  
159  
160  
161  
162  
163  
164  
165  
166  
167  
168  
169  
170  
171  
172  
173  
174  
175  
176  
177  
178  
179  
180  
181  
182  
183  
184  
185  
186  
187  
188  
189  
190  
191  
192  
193  
194  
195  
196  
197  
198  
199  
200  
201  
202  
203  
204  
205  
206  
207  
208  
209  
210  
211  
212  
213  
214  
215  
216  
217  
218  
219  
220  
221  
222  
223  
224  
225  
226  
227  
228  
229  
230  
231  
232  
233  
234  
235  
236  
237  
238  
239  
240  
241  
242  
243  
244  
245  
246  
247  
248  
249  
250  
251  
252  
253  
254  
255  
256  
257  
258  
259  
260  
261  
262  
263  
264  
265  
266  
267  
268  
269  
270  
271  
272  
273  
274  
275  
276  
277  
278  
279  
280  
281  
282  
283  
284  
285  
286  
287  
288  
289  
290  
291  
292  
293  
294  
295  
296  
297  
298  
299  
300  
301  
302  
303  
304  
305  
306  
307  
308  
309  
310  
311  
312  
313  
314  
315  
316  
317  
318  
319  
320  
321  
322  
323  
324  
325  
326  
327  
328  
329  
330  
331  
332  
333  
334  
335  
336  
337  
338  
339  
340  
341  
342  
343  
344  
345  
346  
347  
348  
349  
350  
351  
352  
353  
354  
355  
356  
357  
358  
359  
360  
361  
362  
363  
364  
365  
366  
367  
368  
369  
370  
371  
372  
373  
374  
375  
376  
377  
378  
379  
380  
381  
382  
383  
384  
385  
386  
387  
388  
389  
390  
391  
392  
393  
394  
395  
396  
397  
398  
399  
400  
401  
402  
403  
404  
405  
406  
407  
408  
409  
410  
411  
412  
413  
414  
415  
416  
417  
418  
419  
420  
421  
422  
423  
424  
425  
426  
427  
428  
429  
430  
431  
432  
433  
434  
435  
436  
437  
438  
439  
440  
441  
442  
443  
444  
445  
446  
447  
448  
449  
450  
451  
452  
453  
454  
455  
456  
457  
458  
459  
460  
461  
462  
463  
464  
465  
466  
467  
468  
469  
470  
471  
472  
473  
474  
475  
476  
477  
478  
479  
480  
481  
482  
483  
484  
485  
486  
487  
488  
489  
490  
491  
492  
493  
494  
495  
496  
497  
498  
499  
500  
501  
502  
503  
504  
505  
506  
507  
508  
509  
510  
511  
512  
513  
514  
515  
516  
517  
518  
519  
520  
521  
522  
523  
524  
525  
526  
527  
528  
529  
530  
531  
532  
533  
534  
535  
536  
537  
538  
539  
540  
541  
542  
543  
544  
545  
546  
547  
548  
549  
550  
551  
552  
553  
554  
555  
556  
557  
558  
559  
560  
561  
562  
563  
564  
565  
566  
567  
568  
569  
570  
571  
572  
573  
574  
575  
576  
577  
578  
579  
580  
581  
582  
583  
584  
585  
586  
587  
588  
589  
590  
591  
592  
593  
594  
595  
596  
597  
598  
599  
600  
601  
602  
603  
604  
605  
606  
607  
608  
609  
610  
611  
612  
613  
614  
615  
616  
617  
618  
619  
620  
621  
622  
623  
624  
625  
626  
627  
628  
629  
630  
631  
632  
633  
634  
635  
636  
637  
638  
639  
640  
641  
642  
643  
644  
645  
646  
647  
648  
649  
650  
651  
652  
653  
654  
655  
656  
657  
658  
659  
660  
661  
662  
663  
664  
665  
666  
667  
668  
669  
670  
671  
672  
673  
674  
675  
676  
677  
678  
679  
680  
681  
682  
683  
684  
685  
686  
687  
688  
689  
690  
691  
692  
693  
694  
695  
696  
697  
698  
699  
700  
701  
702  
703  
704  
705  
706  
707  
708  
709  
710  
711  
712  
713  
714  
715  
716  
717  
718  
719  
720  
721  
722  
723  
724  
725  
726  
727  
728  
729  
730  
731  
732  
733  
734  
735  
736  
737  
738  
739  
740  
741  
742  
743  
744  
745  
746  
747  
748  
749  
750  
751  
752  
753  
754  
755  
756  
757  
758  
759  
760  
761  
762  
763  
764  
765  
766  
767  
768  
769  
770  
771  
772  
773  
774  
775  
776  
777  
778  
779  
780  
781  
782  
783  
784  
785  
786  
787  
788  
789  
790  
791  
792  
793  
794  
795  
796  
797  
798  
799  
800  
801  
802  
803  
804  
805  
806  
807  
808  
809  
810  
811  
812  
813  
814  
815  
816  
817  
818  
819  
820  
821  
822  
823  
824  
825  
826  
827  
828  
829  
830  
831  
832  
833  
834  
835  
836  
837  
838  
839  
840  
841  
842  
843  
844  
845  
846  
847  
848  
849  
850  
851  
852  
853  
854  
855  
856  
857  
858  
859  
860  
861  
862  
863  
864  
865  
866  
867  
868  
869  
870  
871  
872  
873  
874  
875  
876  
877  
878  
879  
880  
881  
882  
883  
884  
885  
886  
887  
888  
889  
890  
891  
892  
893  
894  
895  
896  
897  
898  
899  
900  
901  
902  
903  
904  
905  
906  
907  
908  
909  
910  
911  
912  
913  
914  
915  
916  
917  
918  
919  
920  
921  
922  
923  
924  
925  
926  
927  
928  
929  
930  
931  
932  
933  
934  
935  
936  
937  
938  
939  
940  
941  
942  
943  
944  
945  
946  
947  
948  
949  
950  
951  
952  
953  
954  
955  
956  
957  
958  
959  
960  
961  
962  
963  
964  
965  
966  
967  
968  
969  
970  
971  
972  
973  
974  
975  
976  
977  
978  
979  
980  
981  
982  
983  
984  
985  
986  
987  
988  
989  
990  
991  
992  
993  
994  
995  
996  
997  
998  
999  
1000

1  
2  
3  
4 and CFT, contain the greatest numbers of both OMRs and inner membrane iron-siderophore  
5  
6  
7 transporters. E24 and K12 contain the smallest numbers of both types of systems. A clear  
8  
9 correlation between the numbers of iron-siderophore OMRs and inner membrane transporters is  
10  
11 evident for the eight strains of *E. coli* (RSQ value = 0.90). The slope of the trendline (SLOPE =  
12  
13 1.85) confirms the positive correlation between the two sets of values.  
14  
15  
16  
17

### 18 *3.2.6 Nutrient Transporters: Intracellular vs. Extracellular Pathogens*

19  
20 We identified numerous nutrient uptake porters that are uniquely found only in the three  
21  
22 intracellular pathogens or only in the extracellular pathogens (Table 8). Transporters found  
23  
24 exclusively in the intracellular pathovars include certain  $\alpha$ -type channels (TC#1.A),  $\beta$ -barrel  
25  
26 porins (1.B), holins (1.E), MFS porters (2.A.1), multidrug resistance (MDR) RND-type efflux  
27  
28 pumps (2.A.6), ABC porters (3.A.1), PTS sugar uptake transporters (4.A), and various TC class  
29  
30 9.B proteins. Thus, the APE, CFT and ABU strains, all primarily intracellular pathogens, possess  
31  
32 many transport systems that take up metabolic products produced via host intracellular metabolic  
33  
34 processes. Examples include a phosphoglycerate:Pi antiporter (2.A.1.4.2) that takes up glycolytic  
35  
36 intermediates, 2- and 3-phosphoglycerates as well as phosphoenolpyruvate, a pmf-dependent  
37  
38 acetate uptake system (TC#1.A.14.2.2), an ATP-dependent ribose porter (3.A.1.2.1) and a  
39  
40 phosphoenolpyruvate (PEP)-dependent D-tagatose/D-psicose/D-sorbose PTS uptake system  
41  
42 (4.A.2.1.9). While ribose is a substrate of RNA biosynthesis and a product of RNA degradation,  
43  
44 the latter 2-keto hexoses are intermediates of several intracellular metabolic pathways and of  
45  
46 nutritional value ([96]; [97]). These intracellular pathogens also uniquely possess a citrate:H<sup>+</sup>  
47  
48 symporter (2.A.1.6.1), a fumarate-malate transporter (2.A.13.1.2), a citrate:succinate antiporter  
49  
50 (2.A.47.3.2), a tripartite tricarboxylate (citrate, isocitrate and cis-aconitate) transporter  
51  
52 (2.A.80.1.1), and a putative C4-dicarboxylate transporter (9.B.50.1.2), all of which are specific  
53  
54  
55  
56  
57  
58  
59  
60  
61  
62  
63  
64  
65

1  
2  
3  
4 for intermediates in the Krebs (TCA) cycle, and none of which are found in the extracellular  
5  
6 pathovars. In addition to Krebs cycle metabolism, C4-dicarboxylates can be generated via  
7  
8 multiple pathways including amino acid deamination and lipolysis.  
9

10  
11 Two of the intracellular pathogens, APE and CFT, possess an arginine/agmatine  
12  
13 antiporter (2.A.3.2.7), which allows these cells to survive under acidic conditions, for example,  
14  
15 as exist inside lysosomes [98]. These intracellular pathogens also possess a probable  
16  
17 antimonite/arsenite resistance exporter (2.A.47.4.2). Arsenite can be passively taken up by host  
18  
19 cells via aquaglyceroporins (TC # 1.A.8) [99]. Additionally, an ATP-dependent nucleoside group  
20  
21 translocator (4.B.1.1.1) that synthesizes NMN, an intermediate in NAD synthesis, and a thiamin  
22  
23 porter (4.B.1.1.4), involved in the synthesis of thiamin pyrophosphate (TPP), were found in these  
24  
25 strains but not in the extracellular pathogens (Table 8).  
26  
27  
28  
29  
30

31 Surprisingly, the intracellular pathogens possess a glucuronate/galacturonate porter  
32  
33 (2.A.1.14.2), which is absent in the extracellular pathogens (Table 8). These metabolic products  
34  
35 have been shown to be generated intracellularly when exogenous sugars such as lactose are  
36  
37 metabolized by *E. coli* [100]. These compounds are present intracellularly in numerous organs of  
38  
39 animals, and these *E. coli* strains utilize cytoplasmic UDP-glucuronyltransferases for  
40  
41 mucopolysaccharide biosynthesis [101]. Additionally, a sialic acid uptake porter (2.A.56.1.6) is  
42  
43 found exclusively in the intracellular pathogens. Although sialic acids are found in abundance in  
44  
45 cell surface glycolipids and extracellular glycoproteins, *N*-acetylneuraminic acid, the main  
46  
47 mammalian sialic acid, can be found intracellularly where it participates in glycolipid and  
48  
49 glycoprotein biosynthesis [102]. Sialic acid-containing polysaccharide capsules are virulence  
50  
51 factors in *E. coli* urinary tract infections and contribute to biofilm formation [103].  
52  
53  
54  
55  
56  
57  
58  
59  
60  
61  
62  
63  
64  
65



1  
2  
3  
4 Intracellular *E. coli* strains lack various transporters present in extracellular pathogens  
5  
6 that take up metabolites normally found extracellularly. For example, the latter, but not the  
7  
8 former strains possess a rhamnose oligosaccharide porter (3.A.1.5.12), a melibiose permease  
9  
10 (2.A.2.1.1) and a 2-O- $\alpha$ -mannosyl-D-glycerate porter (4.A.2.1.3). These first two  
11  
12 oligosaccharides are constituents of glycolipid and glycoproteins found on the external surfaces  
13  
14 of intestinal villus cells, while the last compound is a known intracellular osmolyte in some  
15  
16 bacteria [104]. The extracellular strains, but not the intracellular strains, also have a xylose:H<sup>+</sup>  
17  
18 symporter (2.A.1.1.3), a mannose PTS porter (4.A.2.1.6), a glucitol PTS transporter (4.A.4.1.2),  
19  
20 and a galactitol PTS permease (4.A.5.1.3). The former two sugars are found in abundance in cell  
21  
22 surface polysaccharides [105, 106] while the hexitols are common osmolytes in animals [107].  
23  
24 The  $\alpha$ -glucoside-specific IICB permease of the PTS (4.A.1.1.10), which transports many  
25  
26 glucosides is similarly found in the extracellular pathogens but lacking in intracellular strains  
27  
28 (Table 9).  
29  
30  
31  
32  
33  
34

35  
36 Other transporters lacking in intracellular but present in extracellular pathogens include  
37  
38 an uptake system for the folate catabolite, p-aminobenzoyl-glutamate (2.A.68.1.1), and a  
39  
40 cyanate/thiocyanate porter (2.A.1.17.1) [108, 109]). Thiocyanate and cyanate are found in  
41  
42 extracellular environments, and although toxic, they can be used as a nitrogen source following  
43  
44 destruction by cyanase, CynS [108]. *E. coli* cells lacking the *cyn* operon are more sensitive to the  
45  
46 toxic effects of cyanate and thiocyanate than strains that possess it [110].  
47  
48  
49

50  
51 A putrescine uptake porter (2.A.3.1.13) was found to be present only in extracellular  
52  
53 strains. Putrescine, like other positively charged polyamines, stabilizes the negatively charged  
54  
55 DNA during replication, but it is also found in abundance in extracellular environments in  
56  
57 mammals such as seminal fluid and urine, especially during episodes of protein breakdown [111,  
58  
59  
60  
61  
62  
63  
64  
65

1  
2  
3  
4 112]. Several MDR and iron-siderophore transporters are found exclusively in intracellular  
5  
6 pathogens, while others are present in extracellular pathogens exclusively. These facts may  
7  
8 reflect the natural cellular substrates of MDR pumps currently not recognized.  
9

### 10 11 12 13 *3.3 Proteins with e-values between 0.1 and 0.0001*

14  
15 Several proteins were identified that gave poor scores in the G-BLAST search, but which  
16  
17 nevertheless proved to be members of TC families. Some of these are presented here in order of  
18  
19 their TC numbers. (1) A putative invasin with similarity to proteins in the OmpA family  
20  
21 (TC#1.B.6) was identified and given the TC number 1.B.6.2.13. (2) A homolog of pore-forming  
22  
23 phage coat protein A was identified and assigned TC# 1.B.53.1.4. (3) Several proteins proved to  
24  
25 be homologous to the cytotoxic pore-forming oligomeric fimbrial subunit, MrxA. One such  
26  
27 protein has been entered into TCDB under TC#1.C.80.1.2. (4) A holin of 108 aas was identified  
28  
29 and entered into TCDB with TC#1.E.2.1.10. This protein was encoded by a gene within a  
30  
31 prophage segment of the genome of UMN with two adjacent genes, a lysozyme inhibitor, and a  
32  
33 lytic protein, probably a lysozyme. (5) An ABC porter, YnjBCD, was assigned TC#3.A.1.19.4.  
34  
35 Although it is annotated as a sulfate/thiosulfate transporter, other members of this family  
36  
37 transport vitamins. (6) Another protein designated YjiG proved to be a distant member of the  
38  
39 FeoB family (TC#9.A.8). A nucleoside-recognition domain may be present in some of these  
40  
41 homologs. YjiG was entered into TCDB with TC# 9.B.156.1.1.  
42  
43  
44  
45  
46  
47  
48  
49  
50  
51

### 52 *3.4 Unique characteristics of enterohaemorrhagic (EHEC) strain, O15*

53  
54 Strain O15 exhibited a number of characteristics that distinguished it from the other six  
55  
56 pathogenic strains of *E. coli* examined. It has two-partner secretion (TPS) systems corresponding  
57  
58 to TC# 1.B.20.1.3 and 1.B.20.1.4. The former system plays a role in contact inhibition of growth  
59  
60  
61  
62  
63  
64  
65

1  
2  
3  
4 [68] while the latter protein is a ShlB-type protein that contains a domain critical for substrate  
5  
6 recognition and folding [113]. It probably secretes a haemolysin-like virulence factor [114] and  
7  
8 has been entered into the database under 1.B.20.1.7.  
9

10  
11 This strain uniquely has an AT-2 type adhesin, most closely related to TC# 1.B.40.1.3, as  
12  
13 well as an intimin, most closely related to TC# 1.B.54.1.1. These proteins were found in no  
14  
15 other *E. coli* strain examined. Most surprisingly, we identified 14 hits of 1.B.6.2.1 and 1.B.6.2.2,  
16  
17 all related to OmpX of the OmpA family. These proteins are in the Ail/Lom family, which in  
18  
19 *Yersinia* species are multifunctional virulence factors that protect against complement [115].  
20  
21 Equally surprising was the unique discovery of 12 putative holins corresponding to TC#  
22  
23 1.E.1.1.3. These holins may be related to phage-encoded shiga-toxins [116].  
24  
25  
26  
27  
28  
29

#### 30 31 **4. Discussion**

32  
33 *4.1 Iron siderophore receptors and transporters contribute to E. coli pathogenesis in a host*  
34  
35 *organism.*  
36

37  
38 *E. coli* is a facultative anaerobe that utilizes iron primarily for electron transport and  
39  
40 cellular respiration. Succinate dehydrogenase and various cytochromes as well as NADH and  
41  
42 ferric oxidase activities are diminished with an iron deficiency [117]. In humans, iron  
43  
44 sequestration plays an important role in host defense against pathogens. Certain conserved  
45  
46 eukaryotic genes encode siderophore/iron-uptake complexes that allow the host to upregulate  
47  
48 iron sequestration in response to inflammatory signals accompanying infection [118]. Some of  
49  
50 these genes play pivotal roles in host defense in Crohn's disease, for their upregulation allows  
51  
52 the host intestinal epithelial cells to sequester more iron [119]. In our study, the pathogenic *E.*  
53  
54 *coli* strains examined proved to have greater numbers of iron-siderophore receptor-encoding  
55  
56 genes than the nonpathogenic K12 strain.  
57  
58  
59  
60  
61  
62  
63  
64  
65

1  
2  
3  
4 Certain iron-siderophore receptors and ABC iron uptake systems are abundant only in  
5  
6 pathovars (Tables 6 and 7). These receptors include a Fe<sup>3+</sup>-catecholate receptor (1.B.14.1.4) and  
7  
8 the ferric-yersiniabactin uptake receptor (1.B.14.7.2). The ferric-yersiniabactin uptake receptor is  
9  
10 known to be required for biofilm production in UPEC strains [120], possibly relevant to host  
11  
12 inflammatory signaling. Ferri-enterobactin receptors (1.B.14.1.3) and ferrichrome receptors  
13  
14 (1.B.14.1.15) were identified exclusively in UPEC strains (ABU and CFT). These receptors may  
15  
16  
17  
18  
19 serve specific functions in UPEC pathogenicity.  
20

21 The increased numbers of iron-complex receptors in pathovars indicate targets for  
22  
23 combating *E. coli* pathogenicity. Increases in siderophore receptor complexes may serve as  
24  
25 compensatory mechanisms in response to host defense. Increased ferrichrome sequestration  
26  
27 undoubtedly allows these pathovars to take up iron more readily, leading to increased survival in  
28  
29 the host.  
30  
31

32  
33 As shown in Figure 2, increases in numbers of iron-sequestering outer membrane  
34  
35 receptors correlate with increases in inner membrane iron ABC transport systems. The UPEC  
36  
37 strains (ABU, CFT and UMN) have larger numbers of both iron-siderophore OMRs and inner  
38  
39 membrane transporters. We speculate that because UPEC strains must survive in both the  
40  
41 gastrointestinal and the urogenital tracts, they must possess a greater number of iron-siderophore  
42  
43 transporters for cellular respiration and survival.  
44  
45  
46  
47

48 It has been shown that ABC porters (3.A.1) in general possess higher affinities for their  
49  
50 substrates than secondary carriers (TC#2.A). Secondary carriers transporting metal cations  
51  
52 typically exhibit Km values of ~ 20-800 uM [121] while primary active transporters may exhibit  
53  
54 Km values ≤ 1 uM [122]. Interestingly, the majority of ABC iron transporters were found either  
55  
56  
57  
58 exclusively in pathogenic strains or in increased numbers (Table 7), and the same strains possess  
59  
60  
61  
62  
63  
64  
65

1  
2  
3  
4 the largest numbers of iron-siderophore OMRs. TC subclass 2.A iron uptake secondary carriers  
5  
6 appear to be present in invariant numbers in all eight *E. coli* strains although the ABC iron-  
7  
8 specific transporters differ greatly among the different serovars (Table 7). This suggests that the  
9  
10 low affinity secondary iron carriers serve housekeeping functions outside of the body, where iron  
11  
12 concentrations are relatively high, while the ABC transporters function in pathogenesis in the *in*  
13  
14  
15  
16 *vivo* environment, where competition with the host is an important factor.  
17  
18  
19  
20

#### 21 *4.2 Pore-forming Toxins.*

22  
23 EHEC and EPEC pathovars typically operate by attaching and effacing (A/E) mechanisms. This  
24  
25 type of invasion includes utilizing a Type III secretion system to inject effector proteins into host  
26  
27 cells. One effector, EspF, plays an important role in tight junction disruption as well as inhibition  
28  
29 of sodium and water uptake [123]. The EspB/D complex was identified in UMN (UPEC) and  
30  
31 O15 (EHEC) and serves to initiate pore formation in the host cell plasma membrane as well as  
32  
33 translocation of EspF into the cell. UPEC strains typically utilize Type I Secretion Systems for  
34  
35 adhesion and entry through manipulating the host cell cytoskeleton using effectors that stimulate  
36  
37 Rho-family GTPases and kinases [124]. Nevertheless, a complete T3SS was identified in UMN,  
38  
39 suggesting that an A/E mechanism of invasion may occur in this pathovar.  
40  
41  
42  
43  
44

45 The identification of Haemolysin A (HlyA) exclusively in the UPEC strains supports a  
46  
47 previous finding that these strains can utilize haemolysins to inhibit protein kinase B signaling  
48  
49 and lead to apoptosis of host cells [37]. Similarly, the exclusive presence of shiga toxin in O15  
50  
51 supports previous findings of EHEC pathogenicity [125]. The Stx pathway may provide an  
52  
53 alternative pathway by which the EHEC strain can inhibit chemical signaling and immune  
54  
55 responses in the host cell.  
56  
57  
58  
59  
60  
61  
62  
63  
64  
65

1  
2  
3  
4 Homologs of the clostridial cytotoxin (CCT) form channels and inactivate Rho-type  
5  
6 GTPases, leading to manipulation of the host cytoskeleton [42]. Predictably, such a toxin was  
7  
8 identified in the UPEC strain, ABU, but more surprisingly, it was also found in O15. This may  
9  
10 suggest an alternative mechanism by which EHEC strains manipulate the host's cytoskeletal  
11  
12 machinery since these pathogens typically utilize the mitochondrial-associated protein [78] to  
13  
14 inhibit the host cell control protein 42 (CDC42), which provides regulatory functions in host cell  
15  
16 actin dynamic control [126]. Since the homologs in ABU and O15 are 85% identical, the same  
17  
18 mechanism is likely to be operative.  
19  
20  
21  
22

23  
24 AIEC strains such as APE, have been cited in 36% of Crohn's disease. These pathogens  
25  
26 operate through necrosis factors that impair host immune responses, allowing the bacteria to  
27  
28 colonize the ileal mucosa and lamina propria [127]. We identified the active subunit of  
29  
30 Cytotoxic Distending Toxin (CdtB) only in APE. The CdtB active subunit induces DNA double-  
31  
32 strand breakage, leading to host cell cycle arrest in the G2/M phase [128]. This is preferable in  
33  
34 the AIEC pathotype, presumably because pauses and irregularities in host cell cycle give the  
35  
36 bacteria time to proliferate and colonize host cells. Rapid proliferation of these AIEC cells can  
37  
38 then induce secretion of Tumor Necrosis Factor Alpha (TNF- $\alpha$ ) that causes inflammation in host  
39  
40 cells.  
41  
42  
43  
44

45  
46 *Serratia*-type pore-forming toxins (S-PFT) were identified in ABU (UPEC), CFT  
47  
48 (UPEC) and O15 (EHEC). These toxins exhibit properties vastly different from those of RTX  
49  
50 pore-forming haemolysins, which are exported via two-partner secretion systems and are much  
51  
52 larger in size [43]. The presence of two-partner secretion system(s) in both ABU and O15  
53  
54 confirmed the possibility of a novel *Serratia*-type Pore-forming Toxin (S-PFT) in both UPEC  
55  
56 and EHEC strains (see Table 3).  
57  
58  
59  
60  
61  
62  
63  
64  
65

#### 4.3 Outer Membrane Protein Secretion Systems.

Many autotransporter-1 systems were identified in the seven pathovars examined. Examples include the fibronectin binding protein (1.B.12.1.3), a tracheal colonization factor (1.B.12.2.2), a firmicute homolog (1.B.12.2.4), and a *Salmonella* BigA homolog (1.B.12.5.5) (see Table 5). Fibronectin binding protein is known to assist in host cell adhesion by *S. typhimurium* [129], providing evidence that a similar mechanism of adhesion may be utilized by UPEC, AIEC, ETEC and EAEC strains for host cell targeting. Interestingly, homologs of the *B. pertussis* tracheal colonization factor were identified in all pathovars except for O15, providing clues as to how such strains target cilia-rich epithelia in the intestines.

Several autotransporter-2 systems were found exclusively in the pathovars. Homologs of the membrane-anchored haemagglutinin, identified in UMN and O15, may play roles in bacterium-host cell adhesion [19]. Trimeric adhesins such as Cha (1.B.40.1.5) and UpaG (1.B.40.2.3) were also identified exclusively in pathovars, and they are known to function in adhesion to the host extracellular matrix [131]. YadB homologs (1.B.40.1.3) function by a similar mechanism, and one was identified in O15, suggesting that it may function specifically in EHEC strains.

EHEC and EPEC strains have been shown to use invasins/intimins to target translocated intimin receptors (Tir) and  $\beta$ -1 integrins on host extracellular matrices for adhesion purposes followed by stimulation of actin rearrangements via the N-Wasp pathway ([132]; [133]). UPEC strains, however, utilize type I pili to bind  $\beta$ -1 integrin on host cell extracellular matrices to initiate actin rearrangements [124]. The presence of invasins/intimins to target  $\beta$ -1 integrins reveals a potential novel mechanism of cell-adhesion and actin rearrangement utilized by these UPEC pathovars.

1  
2  
3  
4 The MdtP outer membrane factor (OMF; TC# 1.B.17.3.9) functions with the MdtO  
5 aromatic acid/drug exporter (2.A.85.6.1) and the auxiliary MFP protein, MdtN (8.A.1.1.3). This  
6  
7 OMF was found in all pathovars but not in K12. This may indicate a multi-drug resistance  
8  
9 mechanism found exclusively in the pathogenic strains that contributes to their resistance to  
10  
11 antibiotics.  
12  
13  
14

15  
16 Fimbrial usher proteins (FUPs) serve important functions in the assembly of fimbriae  
17  
18 [76]. As expected, these proteins were found ubiquitously in all strains including K12. However,  
19  
20 greater numbers of the encoding genes were observed in all pathovars compared to K12,  
21  
22 presumably contributing to pathogenesis by promoting bacterium-host cell adhesion [79].  
23  
24

#### 25 26 *4.4 Multiple pathovars contain T6SS constituents*

27

28 Potentially complete VasA-L T6SSs were identified in multiple pathovars. Protein  
29  
30 products of the *icmF*, *hlc* and *clpV* genes play essential roles in biofilm assembly and general  
31  
32 motility [134]. In recent studies, the T6SS present in *P. aeruginosa* and other bacterial cells was  
33  
34 shown to engage in “T6SS dueling” with surrounding bacteria in competition for survival in the  
35  
36 microbiome [135, 136].  
37  
38

39  
40 With the discovery of T6SSs in *E. coli* pathovars, we speculate that *E. coli* cells engage  
41  
42 in T6SS-mediated competition in the human body. It is possible that pathovars of *E. coli* can  
43  
44 utilize T6SSs both for offense and for defense in the host microbiome. Such a mechanism may  
45  
46 prove valuable during invasion of the colon, where microbes are densely packed with other types  
47  
48 of facultative/obligate anaerobes competing for limited metabolic resources.  
49  
50

#### 51 52 *4.5 Transporters in intracellular vs. extracellular pathogens*

53

54  
55 An interesting pattern revealed by our studies was the existence of different sets of  
56  
57 nutrient uptake transporters, depending on the organismal site of proliferation. Intracellular  
58  
59  
60



1  
2  
3  
4 versus extracellular organisms were distinguishable on the basis of the nature of the substrates  
5  
6 transported. In general, the intracellular pathovar-specific strains take up metabolites expected to  
7  
8 be found inside host cells while the extracellular pathovars transport substrates that are normally  
9  
10 found in abundance outside of host cells. Examples of this can be seen in transporters for  
11  
12 glycolytic and Krebs cycle intermediates found only in intracellular pathogens as well as  
13  
14 transporters for oligosaccharides found only in extracellular pathogens (Table 9). These facts  
15  
16 indicate that these organisms have acquired transport systems through the frequent gain and loss  
17  
18 of the encoding genes probably via horizontal transfer, to take advantage of nutrients available in  
19  
20 their specific environments. Since intracellularity may be a relatively recent development, this  
21  
22 suggests that the gain and loss of genes may have occurred with high frequency in response to  
23  
24 immediate need. It seems probable that such characteristics (e.g., predilection for certain types of  
25  
26 nutrient transporters) can be used for diagnostic purposes.  
27  
28  
29  
30  
31  
32  
33  
34

#### 35 *4.6 Unique characteristics of O15*

36  
37  
38 In screening the data, we noticed that each strain examined has characteristics that  
39  
40 distinguish it from all others. Particularly noteworthy was strain O15, which had numerous  
41  
42 characteristics lacking in the other seven strains. One such example includes extra two-partner  
43  
44 secretion systems as well as a unique AT-2 adhesin and an intimin. More striking was the  
45  
46 occurrence of large numbers of OmpA-like Ail/Lom family proteins that probably serve multiple  
47  
48 virulence functions, including protection against complement as has been documented in  
49  
50 *Yersinia* species [115]. Additionally, this strain possessed numerous holins, all homologous to  
51  
52 1.E.1.1.3, a unique characteristic.  
53  
54  
55  
56  
57  
58

#### 59 **Acknowledgement**

1  
2  
3  
4 We thank Vamsee Reddy for writing a program for tabulating the results summarized in  
5  
6 supplementary Table S1 as well as several of the programs used in this study. This work was  
7  
8 supported by NIH grant GM077402. We also appreciate the support of the research associates of  
9  
10 the Saier Laboratory Group. Finally, we thank the reviewers of this paper for their valuable  
11  
12 suggestions for improvement.  
13  
14  
15  
16  
17  
18

## 19 5. References

- 20  
21 [1] J.H. Peterson, P. Tian, R. Ieva, N. Dautin, H.D. Bernstein, Secretion of a bacterial virulence  
22 factor is driven by the folding of a C-terminal segment, *Proceedings of the National*  
23 *Academy of Sciences of the United States of America* 107 (2010) 17739-17744.  
24  
25 [2] E.J. Williams, N.D. Embleton, M. Bythell, M.P. Ward Platt, J.E. Berrington, The changing  
26 profile of infant mortality from bacterial, viral and fungal infection over two  
27 decades, *Acta paediatrica* 102 (2013) 999-1004.  
28  
29 [3] L. Zhang, B. Foxman, S.D. Manning, P. Tallman, C.F. Marrs, Molecular epidemiologic  
30 approaches to urinary tract infection gene discovery in uropathogenic *Escherichia*  
31 *coli*, *Infection and immunity* 68 (2000) 2009-2015.  
32  
33 [4] F. Qadri, A.M. Svennerholm, A.S. Faruque, R.B. Sack, Enterotoxigenic *Escherichia coli* in  
34 developing countries: epidemiology, microbiology, clinical features, treatment, and  
35 prevention, *Clinical microbiology reviews* 18 (2005) 465-483.  
36  
37 [5] M.B. Cohen, R.A. Giannella, Hemorrhagic colitis associated with *Escherichia coli*  
38 O157:H7, *Advances in internal medicine* 37 (1992) 173-195.  
39  
40 [6] J.B. Kaper, J.P. Nataro, H.L. Mobley, Pathogenic *Escherichia coli*, *Nature reviews.*  
41 *Microbiology* 2 (2004) 123-140.  
42  
43 [7] A. Kokesova, L. Frolova, M. Kverka, D. Sokol, P. Rossmann, J. Bartova, H. Tlaskalova-  
44 Hogenova, Oral administration of probiotic bacteria (*E. coli* Nissle, *E. coli* O83,  
45 *Lactobacillus casei*) influences the severity of dextran sulfate-induced colitis  
46 in BALB/c mice, *Folia microbiologica* 51 (2006) 478-484.  
47  
48 [8] C. Huebner, Y. Ding, I. Petermann, C. Knapp, L.R. Ferguson, The probiotic *Escherichia*  
49 *coli* Nissle 1917 reduces pathogen invasion and modulates cytokine expression in  
50 Caco-2 cells infected with Crohn's disease-associated *E. coli* LF82, *Applied and*  
51 *environmental microbiology* 77 (2011) 2541-2544.  
52  
53 [9] D. Jonkers, J. Penders, A. Masclee, M. Pierik, Probiotics in the management of  
54 inflammatory bowel disease: a systematic review of intervention studies in adult  
55 patients, *Drugs* 72 (2012) 803-823.  
56  
57 [10] V. Hancock, R.M. Vejborg, P. Klemm, Functional genomics of probiotic *Escherichia coli*  
58 Nissle 1917 and 83972, and UPEC strain CFT073: comparison of transcriptomes,  
59 growth and biofilm formation, *Molecular genetics and genomics* : MGG 284 (2010)  
60 437-454.  
61  
62  
63  
64  
65

- 1  
2  
3  
4 [11] A.P. Bhavsar, J.A. Guttman, B.B. Finlay, Manipulation of host-cell pathways by bacterial  
5 pathogens, *Nature* 449 (2007) 827-834.  
6 [12] G.N. Schroeder, H. Hilbi, Molecular pathogenesis of *Shigella* spp.: controlling host cell  
7 signaling, invasion, and death by type III secretion, *Clinical microbiology reviews* 21  
8 (2008) 134-156.  
9 [13] T.K. McDaniel, K.G. Jarvis, M.S. Donnenberg, J.B. Kaper, A genetic locus of enterocyte  
10 effacement conserved among diverse enterobacterial pathogens, *Proceedings of the*  
11 *National Academy of Sciences of the United States of America* 92 (1995) 1664-1668.  
12 [14] E.V. Sokurenko, R. Gomulkiewicz, D.E. Dykhuizen, Source-sink dynamics of virulence  
13 evolution, *Nature reviews. Microbiology* 4 (2006) 548-555.  
14 [15] B.R. Levin, J.J. Bull, Short-sighted evolution and the virulence of pathogenic  
15 microorganisms, *Trends in microbiology* 2 (1994) 76-81.  
16 [16] M.A. Croxen, B.B. Finlay, Molecular mechanisms of *Escherichia coli* pathogenicity,  
17 *Nature reviews. Microbiology* 8 (2010) 26-38.  
18 [17] H. Ochman, R.K. Selander, Standard reference strains of *Escherichia coli* from natural  
19 populations, *Journal of bacteriology* 157 (1984) 690-693.  
20 [18] V.S. Reddy, M.H. Saier, Jr., BioV Suite--a collection of programs for the study of  
21 transport protein evolution, *The FEBS journal* 279 (2012) 2036-2046.  
22 [19] J. Mancini, B. Weckselblatt, Y.K. Chung, J.C. Durante, S. Andelman, J. Glaubman, J.D.  
23 Dorff, S. Bhargava, R.S. Lijek, K.P. Unger, I.N. Okeke, The heat-resistant agglutinin  
24 family includes a novel adhesin from enteroaggregative *Escherichia coli* strain 60A,  
25 *Journal of bacteriology* 193 (2011) 4813-4820.  
26 [20] M. Ikeda, M. Arai, D.M. Lao, T. Shimizu, Transmembrane topology prediction methods:  
27 a re-assessment and improvement by a consensus method using a dataset of  
28 experimentally-characterized transmembrane topologies, *In silico biology* 2 (2002)  
29 19-33.  
30 [21] Y. Zhai, M.H. Saier, Jr., A web-based program (WHAT) for the simultaneous prediction  
31 of hydrophathy, amphipathicity, secondary structure and transmembrane topology  
32 for a single protein sequence, *Journal of molecular microbiology and biotechnology*  
33 3 (2001) 501-502.  
34 [22] V.S. Reddy, M.A. Shlykov, R. Castillo, E.I. Sun, M.H. Saier, Jr., The major facilitator  
35 superfamily (MFS) revisited, *The FEBS journal* 279 (2012) 2022-2035.  
36 [23] R. Castillo, M.H. Saier, Functional Promiscuity of Homologues of the Bacterial Arsa  
37 ATPases, *International journal of microbiology* 2010 (2010) 187373.  
38 [24] M.H. Saier, Jr., M.R. Yen, K. Noto, D.G. Tamang, C. Elkan, The Transporter Classification  
39 Database: recent advances, *Nucleic acids research* 37 (2009) D274-278.  
40 [25] C. Schwarzer, Z. Fu, M. Patanwala, L. Hum, M. Lopez-Guzman, B. Illek, W. Kong, S.V.  
41 Lynch, T.E. Machen, *Pseudomonas aeruginosa* biofilm-associated homoserine  
42 lactone C12 rapidly activates apoptosis in airway epithelia, *Cellular microbiology* 14  
43 (2012) 698-709.  
44 [26] S.H. Hong, X. Wang, T.K. Wood, Controlling biofilm formation, prophage excision and  
45 cell death by rewiring global regulator H-NS of *Escherichia coli*, *Microbial*  
46 *biotechnology* 3 (2010) 344-356.  
47 [27] J.W. Durkee, Jr., P.P. Antich, C.E. Lee, Exact solutions to the multiregion time-dependent  
48 bioheat equation. I: Solution development, *Physics in medicine and biology* 35  
49 (1990) 847-867.  
50  
51  
52  
53  
54  
55  
56  
57  
58  
59  
60  
61  
62  
63  
64  
65

- 1  
2  
3  
4 [28] R.D. Barabote, M.H. Saier, Jr., Comparative genomic analyses of the bacterial  
5 phosphotransferase system, *Microbiology and molecular biology reviews* : MMBR  
6 69 (2005) 608-634.  
7  
8 [29] T.H. Walther, C. Gottselig, S.L. Grage, M. Wolf, A.V. Vargiu, M.J. Klein, S. Vollmer, S.  
9 Prock, M. Hartmann, S. Afonin, E. Stockwald, H. Heinzmann, O.V. Nolandt, W. Wenzel,  
10 P. Ruggerone, A.S. Ulrich, Folding and self-assembly of the TatA translocation pore  
11 based on a charge zipper mechanism, *Cell* 152 (2013) 316-326.  
12  
13 [30] J.K. Davis, Combining polysaccharide biosynthesis and transport in a single enzyme:  
14 dual-function cell wall glycan synthases, *Frontiers in plant science* 3 (2012) 138.  
15  
16 [31] C. Hubbard, J.T. McNamara, C. Azumaya, M.S. Patel, J. Zimmer, The hyaluronan  
17 synthase catalyzes the synthesis and membrane translocation of hyaluronan,  
18 *Journal of molecular biology* 418 (2012) 21-31.  
19  
20 [32] P.L. DeAngelis, Microbial glycosaminoglycan glycosyltransferases, *Glycobiology* 12  
21 (2002) 9R-16R.  
22  
23 [33] K. Denoncin, J.F. Collet, Disulfide bond formation in the bacterial periplasm: major  
24 achievements and challenges ahead, *Antioxidants & redox signaling* 19 (2013) 63-  
25 71.  
26  
27 [34] S.B. Tzokov, N.R. Wyborn, T.J. Stillman, S. Jamieson, N. Czudnochowski, P.J. Artymiuk, J.  
28 Green, P.A. Bullough, Structure of the hemolysin E (HlyE, ClyA, and SheA) channel in  
29 its membrane-bound form, *The Journal of biological chemistry* 281 (2006) 23042-  
30 23049.  
31  
32 [35] S. Hunt, A.J. Moir, S. Tzokov, P.A. Bullough, P.J. Artymiuk, J. Green, The formation and  
33 structure of *Escherichia coli* K-12 haemolysin E pores, *Microbiology* 154 (2008)  
34 633-642.  
35  
36 [36] R.L. Davies, T.S. Whittam, R.K. Selander, Sequence diversity and molecular evolution of  
37 the leukotoxin (lktA) gene in bovine and ovine strains of *Mannheimia* (*Pasteurella*)  
38 *haemolytica*, *Journal of bacteriology* 183 (2001) 1394-1404.  
39  
40 [37] T.J. Wiles, B.K. Dhakal, D.S. Eto, M.A. Mulvey, Inactivation of host Akt/protein kinase B  
41 signaling by bacterial pore-forming toxins, *Molecular biology of the cell* 19 (2008)  
42 1427-1438.  
43  
44 [38] Y. Iizumi, H. Sagara, Y. Kabe, M. Azuma, K. Kume, M. Ogawa, T. Nagai, P.G. Gillespie, C.  
45 Sasakawa, H. Handa, The enteropathogenic *E. coli* effector EspB facilitates  
46 microvillus effacing and antiphagocytosis by inhibiting myosin function, *Cell host &*  
47 *microbe* 2 (2007) 383-392.  
48  
49 [39] L. Aguilera, E. Ferreira, R. Gimenez, F.J. Fernandez, M. Taules, J. Aguilar, M.C. Vega, J.  
50 Badia, L. Baldoma, Secretion of the housekeeping protein glyceraldehyde-3-  
51 phosphate dehydrogenase by the LEE-encoded type III secretion system in  
52 enteropathogenic *Escherichia coli*, *The international journal of biochemistry & cell*  
53 *biology* 44 (2012) 955-962.  
54  
55 [40] H. Nakao, T. Takeda, *Escherichia coli* Shiga toxin, *Journal of natural toxins* 9 (2000)  
56 299-313.  
57  
58 [41] R.N. Pruitt, M.G. Chambers, K.K. Ng, M.D. Ohi, D.B. Lacy, Structural organization of the  
59 functional domains of *Clostridium difficile* toxins A and B, *Proceedings of the*  
60 *National Academy of Sciences of the United States of America* 107 (2010) 13467-  
61 13472.  
62  
63  
64  
65

- 1  
2  
3  
4 [42] E. Oswald, M. Sugai, A. Labigne, H.C. Wu, C. Fiorentini, P. Boquet, A.D. O'Brien, Cytotoxic  
5 necrotizing factor type 2 produced by virulent *Escherichia coli* modifies the small  
6 GTP-binding proteins Rho involved in assembly of actin stress fibers, *Proceedings of*  
7 *the National Academy of Sciences of the United States of America* 91 (1994) 3814-  
8 3818.  
9  
10 [43] R. Hertle, The family of Serratia type pore forming toxins, *Current protein & peptide*  
11 *science* 6 (2005) 313-325.  
12  
13 [44] J. Banerjee, J. Singh, M.C. Joshi, S. Ghosh, N. Banerjee, The cytotoxic fimbrial structural  
14 subunit of *Xenorhabdus nematophila* is a pore-forming toxin, *Journal of bacteriology*  
15 188 (2006) 7957-7962.  
16  
17 [45] A. Eshraghi, F.J. Maldonado-Arocho, A. Gargi, M.M. Cardwell, M.G. Prouty, S.R. Blanke,  
18 K.A. Bradley, Cytolethal distending toxin family members are differentially affected  
19 by alterations in host glycans and membrane cholesterol, *The Journal of biological*  
20 *chemistry* 285 (2010) 18199-18207.  
21  
22 [46] C.A. Elwell, L.A. Dreyfus, DNase I homologous residues in CdtB are critical for  
23 cytolethal distending toxin-mediated cell cycle arrest, *Molecular microbiology* 37  
24 (2000) 952-963.  
25  
26 [47] J.L. Smith, D.O. Bayles, The contribution of cytolethal distending toxin to bacterial  
27 pathogenesis, *Critical reviews in microbiology* 32 (2006) 227-248.  
28  
29 [48] M.H. Saier, C.H. Ma, L. Rodgers, D.G. Tamang, M.R. Yen, Protein secretion and  
30 membrane insertion systems in bacteria and eukaryotic organelles, *Advances in*  
31 *applied microbiology* 65 (2008) 141-197.  
32  
33 [49] B. Wang, M. Dukarevich, E.I. Sun, M.R. Yen, M.H. Saier, Jr., Membrane porters of ATP-  
34 binding cassette transport systems are polyphyletic, *The Journal of membrane*  
35 *biology* 231 (2009) 1-10.  
36  
37 [50] M.R. Yen, C.R. Peabody, S.M. Partovi, Y. Zhai, Y.H. Tseng, M.H. Saier, Protein-  
38 translocating outer membrane porins of Gram-negative bacteria, *Biochimica et*  
39 *biophysica acta* 1562 (2002) 6-31.  
40  
41 [51] I.T. Paulsen, J.H. Park, P.S. Choi, M.H. Saier, Jr., A family of gram-negative bacterial  
42 outer membrane factors that function in the export of proteins, carbohydrates,  
43 drugs and heavy metals from gram-negative bacteria, *FEMS microbiology letters*  
44 156 (1997) 1-8.  
45  
46 [52] M.H. Saier, Jr., Protein secretion and membrane insertion systems in gram-negative  
47 bacteria, *The Journal of membrane biology* 214 (2006) 75-90.  
48  
49 [53] C.A. Mueller, P. Broz, G.R. Cornelis, The type III secretion system tip complex and  
50 translocon, *Molecular microbiology* 68 (2008) 1085-1095.  
51  
52 [54] S. Woestyn, A. Allaoui, P. Wattiau, G.R. Cornelis, YscN, the putative energizer of the  
53 *Yersinia* Yop secretion machinery, *Journal of bacteriology* 176 (1994) 1561-1569.  
54  
55 [55] A. Clements, J.C. Young, N. Constantinou, G. Frankel, Infection strategies of enteric  
56 pathogenic *Escherichia coli*, *Gut microbes* 3 (2012) 71-87.  
57  
58 [56] A. Diepold, U. Wiesand, G.R. Cornelis, The assembly of the export apparatus  
59 (YscR,S,T,U,V) of the *Yersinia* type III secretion apparatus occurs independently of  
60 other structural components and involves the formation of an YscV oligomer,  
61 *Molecular microbiology* 82 (2011) 502-514.  
62  
63 [57] C.E. Alvarez-Martinez, P.J. Christie, Biological diversity of prokaryotic type IV secretion  
64 systems, *Microbiology and molecular biology reviews* : *MMBR* 73 (2009) 775-808.  
65

- 1  
2  
3  
4 [58] A. Verma, D.L. Burns, Requirements for assembly of PtlH with the pertussis toxin  
5 transporter apparatus of *Bordetella pertussis*, *Infection and immunity* 75 (2007)  
6 2297-2306.  
7  
8 [59] S. Pukatzki, A.T. Ma, A.T. Revel, D. Sturtevant, J.J. Mekalanos, Type VI secretion system  
9 translocates a phage tail spike-like protein into target cells where it cross-links  
10 actin, *Proceedings of the National Academy of Sciences of the United States of*  
11 *America* 104 (2007) 15508-15513.  
12  
13 [60] B.J. Loveless, M.H. Saier, Jr., A novel family of channel-forming, autotransporting,  
14 bacterial virulence factors, *Molecular membrane biology* 14 (1997) 113-123.  
15 [61] A. Lauri, B. Castiglioni, P. Mariani, Comprehensive analysis of *Salmonella* sequence  
16 polymorphisms and development of a LDR-UA assay for the detection and  
17 characterization of selected serotypes, *Applied microbiology and biotechnology* 91  
18 (2011) 189-210.  
19  
20 [62] A.I. Etcheverria, N.L. Padola, Shiga toxin-producing *Escherichia coli*: factors involved in  
21 virulence and cattle colonization, *Virulence* 4 (2013) 366-372.  
22  
23 [63] A. Roggenkamp, N. Ackermann, C.A. Jacobi, K. Truelzsch, H. Hoffmann, J. Heesemann,  
24 Molecular analysis of transport and oligomerization of the *Yersinia enterocolitica*  
25 adhesin YadA, *Journal of bacteriology* 185 (2003) 3735-3744.  
26  
27 [64] S. Forman, C.R. Wulff, T. Myers-Morales, C. Cowan, R.D. Perry, S.C. Straley, yadBC of  
28 *Yersinia pestis*, a new virulence determinant for bubonic plague, *Infection and*  
29 *immunity* 76 (2008) 578-587.  
30  
31 [65] J.C. Leo, I. Grin, D. Linke, Type V secretion: mechanism(s) of autotransport through the  
32 bacterial outer membrane, *Philosophical transactions of the Royal Society of*  
33 *London. Series B, Biological sciences* 367 (2012) 1088-1101.  
34  
35 [66] O. Gal-Mor, D.L. Gibson, D. Baluta, B.A. Vallance, B.B. Finlay, A novel secretion pathway  
36 of *Salmonella enterica* acts as an antivirulence modulator during salmonellosis,  
37 *PLoS pathogens* 4 (2008) e1000036.  
38  
39 [67] A. Wentzel, A. Christmann, T. Adams, H. Kolmar, Display of passenger proteins on the  
40 surface of *Escherichia coli* K-12 by the enterohemorrhagic *E. coli* intimin EaeA,  
41 *Journal of bacteriology* 183 (2001) 7273-7284.  
42  
43 [68] S.K. Aoki, R. Pamma, A.D. Hernday, J.E. Bickham, B.A. Braaten, D.A. Low, Contact-  
44 dependent inhibition of growth in *Escherichia coli*, *Science* 309 (2005) 1245-1248.  
45  
46 [69] K.T. Harley, M.H. Saier, Jr., A novel ubiquitous family of putative efflux transporters,  
47 *Journal of molecular microbiology and biotechnology* 2 (2000) 195-198.  
48  
49 [70] T.T. Tseng, K.S. Gratwick, J. Kollman, D. Park, D.H. Nies, A. Goffeau, M.H. Saier, Jr., The  
50 RND permease superfamily: an ancient, ubiquitous and diverse family that includes  
51 human disease and development proteins, *Journal of molecular microbiology and*  
52 *biotechnology* 1 (1999) 107-125.  
53  
54 [71] T. Dinh, I.T. Paulsen, M.H. Saier, Jr., A family of extracytoplasmic proteins that allow  
55 transport of large molecules across the outer membranes of gram-negative bacteria,  
56 *Journal of bacteriology* 176 (1994) 3825-3831.  
57  
58 [72] K.K. Wong, F.S. Brinkman, R.S. Benz, R.E. Hancock, Evaluation of a structural model of  
59 *Pseudomonas aeruginosa* outer membrane protein OprM, an efflux component  
60 involved in intrinsic antibiotic resistance, *Journal of bacteriology* 183 (2001) 367-  
61 374.  
62  
63  
64  
65

- 1  
2  
3  
4 [73] S. Letoffe, P. Delepelaire, C. Wandersman, Protein secretion in gram-negative bacteria:  
5 assembly of the three components of ABC protein-mediated exporters is ordered  
6 and promoted by substrate binding, *The EMBO journal* 15 (1996) 5804-5811.
- 7 [74] C. Bleuel, C. Grosse, N. Taudte, J. Scherer, D. Wesenberg, G.J. Krauss, D.H. Nies, G. Grass,  
8 TolC is involved in enterobactin efflux across the outer membrane of *Escherichia*  
9 *coli*, *Journal of bacteriology* 187 (2005) 6701-6707.
- 10 [75] M.C. Sulavik, C. Houseweart, C. Cramer, N. Jiwani, N. Murgolo, J. Greene, B. DiDomenico,  
11 K.J. Shaw, G.H. Miller, R. Hare, G. Shimer, Antibiotic susceptibility profiles of  
12 *Escherichia coli* strains lacking multidrug efflux pump genes, *Antimicrobial agents*  
13 *and chemotherapy* 45 (2001) 1126-1136.
- 14 [76] S. Clegg, J. Wilson, J. Johnson, More than one way to control hair growth: regulatory  
15 mechanisms in enterobacteria that affect fimbriae assembled by the  
16 chaperone/usher pathway, *Journal of bacteriology* 193 (2011) 2081-2088.
- 17 [77] N.S. Henderson, S.S. So, C. Martin, R. Kulkarni, D.G. Thanassi, Topology of the outer  
18 membrane usher PapC determined by site-directed fluorescence labeling, *The*  
19 *Journal of biological chemistry* 279 (2004) 53747-53754.
- 20 [78] O.S. Mapingire, N.S. Henderson, G. Duret, D.G. Thanassi, A.H. Delcour, Modulating  
21 effects of the plug, helix, and N- and C-terminal domains on channel properties of  
22 the PapC usher, *The Journal of biological chemistry* 284 (2009) 36324-36333.
- 23 [79] S.P. Nuccio, A.J. Baumler, Evolution of the chaperone/usher assembly pathway:  
24 fimbrial classification goes Greek, *Microbiology and molecular biology reviews* :  
25 *MMBR* 71 (2007) 551-575.
- 26 [80] S. Guedin, E. Willery, J. Tommassen, E. Fort, H. Drobecq, C. Locht, F. Jacob-Dubuisson,  
27 Novel topological features of FhaC, the outer membrane transporter involved in the  
28 secretion of the *Bordetella pertussis* filamentous hemagglutinin, *The Journal of*  
29 *biological chemistry* 275 (2000) 30202-30210.
- 30 [81] R. Brok, P. Van Gelder, M. Winterhalter, U. Ziese, A.J. Koster, H. de Cock, M. Koster, J.  
31 Tommassen, W. Bitter, The C-terminal domain of the *Pseudomonas* secretin XcpQ  
32 forms oligomeric rings with pore activity, *Journal of molecular biology* 294 (1999)  
33 1169-1179.
- 34 [82] K.V. Korotkov, T. Gonen, W.G. Hol, Secretins: dynamic channels for protein transport  
35 across membranes, *Trends in biochemical sciences* 36 (2011) 433-443.
- 36 [83] L.S. McLaughlin, R.J. Haft, K.T. Forest, Structural insights into the Type II secretion  
37 nanomachine, *Current opinion in structural biology* 22 (2012) 208-216.
- 38 [84] D. Sun, X. Zhang, L. Wang, M. Prudhomme, Z. Xie, B. Martin, J.P. Claverys, Transforming  
39 DNA uptake gene orthologs do not mediate spontaneous plasmid transformation in  
40 *Escherichia coli*, *Journal of bacteriology* 191 (2009) 713-719.
- 41 [85] K.S. Jakes, W.A. Cramer, Border crossings: colicins and transporters, *Annual review of*  
42 *genetics* 46 (2012) 209-231.
- 43 [86] R.J. Cousins, J.P. Liuzzi, L.A. Lichten, Mammalian zinc transport, trafficking, and signals,  
44 *The Journal of biological chemistry* 281 (2006) 24085-24089.
- 45 [87] S. Nishida, Y. Morinaga, H. Obata, T. Mizuno, Identification of the N-terminal region of  
46 TjZNT2, a Zrt/Irt-like protein family metal transporter, as a novel functional region  
47 involved in metal ion selectivity, *The FEBS journal* 278 (2011) 851-858.
- 48  
49  
50  
51  
52  
53  
54  
55  
56  
57  
58  
59  
60  
61  
62  
63  
64  
65

- 1  
2  
3  
4 [88] J.E. Karlinsey, M.E. Maguire, L.A. Becker, M.L. Crouch, F.C. Fang, The phage shock  
5 protein PspA facilitates divalent metal transport and is required for virulence of  
6 *Salmonella enterica* sv. Typhimurium, *Molecular microbiology* 78 (2010) 669-685.
- 7 [89] L.A. Gaither, D.J. Eide, The human ZIP1 transporter mediates zinc uptake in human  
8 K562 erythroleukemia cells, *The Journal of biological chemistry* 276 (2001) 22258-  
9 22264.
- 10 [90] M.E. Techau, J. Valdez-Taubas, J.F. Popoff, R. Francis, M. Seaman, J.M. Blackwell,  
11 Evolution of differences in transport function in Slc11a family members, *The Journal*  
12 *of biological chemistry* 282 (2007) 35646-35656.
- 13 [91] T.C. Marlovits, W. Haase, C. Herrmann, S.G. Aller, V.M. Unger, The membrane protein  
14 FeoB contains an intramolecular G protein essential for Fe(II) uptake in bacteria,  
15 *Proceedings of the National Academy of Sciences of the United States of America* 99  
16 (2002) 16243-16248.
- 17 [92] S. Koster, M. Wehner, C. Herrmann, W. Kuhlbrandt, O. Yildiz, Structure and function of  
18 the FeoB G-domain from *Methanococcus jannaschii*, *Journal of molecular biology*  
19 392 (2009) 405-419.
- 20 [93] M.R. Ash, A. Guilfoyle, R.J. Clarke, J.M. Guss, M.J. Maher, M. Jormakka, Potassium-  
21 activated GTPase reaction in the G Protein-coupled ferrous iron transporter B, *The*  
22 *Journal of biological chemistry* 285 (2010) 14594-14602.
- 23 [94] C.N. Deshpande, A.P. McGrath, J. Font, A.P. Guilfoyle, M.J. Maher, M. Jormakka, Structure  
24 of an atypical FeoB G-domain reveals a putative domain-swapped dimer, *Acta*  
25 *crystallographica. Section F, Structural biology and crystallization communications*  
26 69 (2013) 399-404.
- 27 [95] M.R. Ash, M.J. Maher, J.M. Guss, M. Jormakka, The initiation of GTP hydrolysis by the G-  
28 domain of FeoB: insights from a transition-state complex structure, *PloS one* 6  
29 (2011) e23355.
- 30 [96] W. Mu, W. Zhang, Y. Feng, B. Jiang, L. Zhou, Recent advances on applications and  
31 biotechnological production of D-psicose, *Applied microbiology and biotechnology*  
32 94 (2012) 1461-1467.
- 33 [97] S. Boudebouze, E. Maguin, M. Rhimi, Bacterial L-arabinose isomerases: industrial  
34 application for D-tagatose production, *Recent patents on DNA & gene sequences* 5  
35 (2011) 194-201.
- 36 [98] R. Iyer, C. Williams, C. Miller, Arginine-arginine antiporter in extreme acid resistance  
37 in *Escherichia coli*, *Journal of bacteriology* 185 (2003) 6556-6561.
- 38 [99] S. Mathews, B. Rathinasabapathi, L.Q. Ma, Uptake and translocation of arsenite by  
39 *Pteris vittata* L.: effects of glycerol, antimonite and silver, *Environmental pollution*  
40 159 (2011) 3490-3495.
- 41 [100] M. Rothe, C. Alpert, G. Loh, M. Blaut, Novel insights into *E. coli*'s hexuronate  
42 metabolism: KduI facilitates the conversion of galacturonate and glucuronate under  
43 osmotic stress conditions, *PloS one* 8 (2013) e56906.
- 44 [101] C.D. King, G.R. Rios, M.D. Green, T.R. Tephly, UDP-glucuronosyltransferases, *Current*  
45 *drug metabolism* 1 (2000) 143-161.
- 46 [102] E. Severi, D.W. Hood, G.H. Thomas, Sialic acid utilization by bacterial pathogens,  
47 *Microbiology* 153 (2007) 2817-2822.
- 48  
49  
50  
51  
52  
53  
54  
55  
56  
57  
58  
59  
60  
61  
62  
63  
64  
65



- 1  
2  
3  
4 [103] C.C. Goller, P.C. Seed, Revisiting the Escherichia coli polysaccharide capsule as a  
5 virulence factor during urinary tract infection: contribution to intracellular biofilm  
6 development, *Virulence* 1 (2010) 333-337.  
7  
8 [104] F. Robicsek, D.S. Citron, F.H. Taylor, P.W. Sanger, The Treatment of Malignant  
9 Hypertension Due to Ischemia of the Solitary Functioning Kidney, *Angiology* 14  
10 (1963) 377-380.  
11  
12 [105] P.M. Rudd, M.R. Wormald, R.A. Dwek, Sugar-mediated ligand-receptor interactions in  
13 the immune system, *Trends in biotechnology* 22 (2004) 524-530.  
14  
15 [106] J. Peter-Katalinic, Methods in enzymology: O-glycosylation of proteins, *Methods in*  
16 *enzymology* 405 (2005) 139-171.  
17  
18 [107] S.D. Edmands, K.S. Hughs, S.Y. Lee, S.D. Meyer, E. Saari, P.H. Yancey, Time-dependent  
19 aspects of osmolyte changes in rat kidney, urine, blood and lens with sorbinil and  
20 galactose feeding, *Kidney international* 48 (1995) 344-353.  
21  
22 [108] P.M. Anderson, Y.C. Sung, J.A. Fuchs, The cyanase operon and cyanate metabolism,  
23 *FEMS microbiology reviews* 7 (1990) 247-252.  
24  
25 [109] Y.C. Sung, J.A. Fuchs, Identification and characterization of a cyanate permease in  
26 *Escherichia coli* K-12, *Journal of bacteriology* 171 (1989) 4674-4678.  
27  
28 [110] N. Pedemonte, E. Caci, E. Sondo, A. Caputo, K. Rhoden, U. Pfeffer, M. Di Candia, R.  
29 Bandettini, R. Ravazzolo, O. Zegarra-Moran, L.J. Galiotta, Thiocyanate transport in  
30 resting and IL-4-stimulated human bronchial epithelial cells: role of pendrin and  
31 anion channels, *Journal of immunology* 178 (2007) 5144-5153.  
32  
33 [111] A.A. Abdulhussein, H.M. Wallace, Polyamines and membrane transporters, *Amino*  
34 *acids* (2013).  
35  
36 [112] A.C. Andersson, S. Henningsson, E. Rosengren, Increased formation of diamines and  
37 polyamines in the pregnant rat, *The Journal of physiology* 285 (1978) 311-324.  
38  
39 [113] P.Z. Gatzeva-Topalova, T.A. Walton, M.C. Sousa, Crystal structure of YaeT:  
40 conformational flexibility and substrate recognition, *Structure* 16 (2008) 1873-  
41 1881.  
42  
43 [114] P.S. Choi, A.J. Dawson, H.D. Bernstein, Characterization of a novel two-partner  
44 secretion system in *Escherichia coli* O157:H7, *Journal of bacteriology* 189 (2007)  
45 3452-3461.  
46  
47 [115] A.M. Kolodziejek, C.J. Hovde, S.A. Minnich, *Yersinia pestis* Ail: multiple roles of a single  
48 protein, *Frontiers in cellular and infection microbiology* 2 (2012) 103.  
49  
50 [116] M.N. Neely, D.I. Friedman, Functional and genetic analysis of regulatory regions of  
51 coliphage H-19B: location of shiga-like toxin and lysis genes suggest a role for phage  
52 functions in toxin release, *Molecular microbiology* 28 (1998) 1255-1267.  
53  
54 [117] D.J. Rainnie, P.D. Bragg, The effect of iron deficiency on respiration and energy-  
55 coupling in *Escherichia coli*, *Journal of general microbiology* 77 (1973) 339-349.  
56  
57 [118] L. Wang, B.J. Cherayil, Ironing out the wrinkles in host defense: interactions between  
58 iron homeostasis and innate immunity, *Journal of innate immunity* 1 (2009) 455-  
59 464.  
60  
61 [119] G. Semrin, D.S. Fishman, A. Bousvaros, A. Zholudev, A.C. Saunders, C.E. Correia, E.  
62 Nemeth, R.J. Grand, D.A. Weinstein, Impaired intestinal iron absorption in Crohn's  
63 disease correlates with disease activity and markers of inflammation, *Inflammatory*  
64 *bowel diseases* 12 (2006) 1101-1106.  
65

- 1  
2  
3  
4 [120] V. Hancock, L. Ferrieres, P. Klemm, The ferric yersiniabactin uptake receptor FyuA is  
5 required for efficient biofilm formation by urinary tract infectious *Escherichia coli* in  
6 human urine, *Microbiology* 154 (2008) 167-175.
- 7 [121] R. Cailliatte, A. Schikora, J.F. Briat, S. Mari, C. Curie, High-affinity manganese uptake  
8 by the metal transporter NRAMP1 is essential for *Arabidopsis* growth in low  
9 manganese conditions, *The Plant cell* 22 (2010) 904-917.
- 10 [122] D.S. Anderson, P. Adhikari, A.J. Nowalk, C.Y. Chen, T.A. Mietzner, The hFbpABC  
11 transporter from *Haemophilus influenzae* functions as a binding-protein-dependent  
12 ABC transporter with high specificity and affinity for ferric iron, *Journal of*  
13 *bacteriology* 186 (2004) 6220-6229.
- 14 [123] K. Hodges, N.M. Alto, K. Ramaswamy, P.K. Dudeja, G. Hecht, The enteropathogenic  
15 *Escherichia coli* effector protein EspF decreases sodium hydrogen exchanger 3  
16 activity, *Cellular microbiology* 10 (2008) 1735-1745.
- 17 [124] D.S. Eto, T.A. Jones, J.L. Sundsbak, M.A. Mulvey, Integrin-mediated host cell invasion  
18 by type 1-piliated uropathogenic *Escherichia coli*, *PLoS pathogens* 3 (2007) e100.
- 19 [125] A.P. Gobert, M. Vareille, A.L. Glasser, T. Hindre, T. de Sablet, C. Martin, Shiga toxin  
20 produced by enterohemorrhagic *Escherichia coli* inhibits PI3K/NF-kappaB signaling  
21 pathway in globotriaosylceramide-3-negative human intestinal epithelial cells,  
22 *Journal of immunology* 178 (2007) 8168-8174.
- 23 [126] Z. Huang, S.E. Sutton, A.J. Wallenfang, R.C. Orchard, X. Wu, Y. Feng, J. Chai, N.M. Alto,  
24 Structural insights into host GTPase isoform selection by a family of bacterial GEF  
25 mimics, *Nature structural & molecular biology* 16 (2009) 853-860.
- 26 [127] N. Rolhion, A. Darfeuille-Michaud, Adherent-invasive *Escherichia coli* in  
27 inflammatory bowel disease, *Inflammatory bowel diseases* 13 (2007) 1277-1283.
- 28 [128] M. Thelestam, T. Frisan, Cytotoxic distending toxins, *Reviews of physiology,*  
29 *biochemistry and pharmacology* 152 (2004) 111-133.
- 30 [129] C. Tukel, M. Akcelik, M.F. de Jong, O. Simsek, R.M. Tsolis, A.J. Baumler, MarT activates  
31 expression of the MisL autotransporter protein of *Salmonella enterica* serotype  
32 Typhimurium, *Journal of bacteriology* 189 (2007) 3922-3926.
- 33 [130] J.K. Kim, V. Vinarsky, J. Wain, R. Zhao, K. Jung, J. Choi, A. Lam, A. Pardo-Saganta, S.  
34 Breton, J. Rajagopal, S.H. Yun, In vivo imaging of tracheal epithelial cells in mice  
35 during airway regeneration, *American journal of respiratory cell and molecular*  
36 *biology* 47 (2012) 864-868.
- 37 [131] K.K. Koretke, P. Szczesny, M. Gruber, A.N. Lupas, Model structure of the prototypical  
38 non-fimbrial adhesin YadA of *Yersinia enterocolitica*, *Journal of structural biology*  
39 155 (2006) 154-161.
- 40 [132] A.I. Swimm, D. Kalman, Cytosolic extract induces Tir translocation and pedestals in  
41 EPEC-infected red blood cells, *PLoS pathogens* 4 (2008) e4.
- 42 [133] S. Schuller, Y. Chong, J. Lewin, B. Kenny, G. Frankel, A.D. Phillips, Tir phosphorylation  
43 and Nck/N-WASP recruitment by enteropathogenic and enterohaemorrhagic  
44 *Escherichia coli* during ex vivo colonization of human intestinal mucosa is different  
45 to cell culture models, *Cellular microbiology* 9 (2007) 1352-1364.
- 46 [134] F. de Pace, J. Boldrin de Paiva, G. Nakazato, M. Lancellotti, M.P. Sircili, E. Guedes  
47 Stehling, W. Dias da Silveira, V. Sperandio, Characterization of IcmF of the type VI  
48 secretion system in an avian pathogenic *Escherichia coli* (APEC) strain,  
49 *Microbiology* 157 (2011) 2954-2962.
- 50  
51  
52  
53  
54  
55  
56  
57  
58  
59  
60  
61  
62  
63  
64  
65

1  
2  
3  
4  
5  
6  
7  
8  
9  
10  
11  
12  
13  
14  
15  
16  
17  
18  
19  
20  
21  
22  
23  
24  
25  
26  
27  
28  
29  
30  
31  
32  
33  
34  
35  
36  
37  
38  
39  
40  
41  
42  
43  
44  
45  
46  
47  
48  
49  
50  
51  
52  
53  
54  
55  
56  
57  
58  
59  
60  
61  
62  
63  
64  
65

[135] M. Basler, B.T. Ho, J.J. Mekalanos, Tit-for-tat: type VI secretion system counterattack during bacterial cell-cell interactions, *Cell* 152 (2013) 884-894.

[136] L.G. Pell, V. Kanelis, L.W. Donaldson, P.L. Howell, A.R. Davidson, The phage lambda major tail protein structure reveals a common evolution for long-tailed phages and the type VI bacterial secretion system, *Proceedings of the National Academy of Sciences of the United States of America* 106 (2009) 4160-4165.

[137] N. Barnich, F.A. Carvalho, A.L. Glasser, C. Darcha, P. Jantscheff, M. Allez, H. Peeters, G. Bommelaer, P. Desreumaux, J.F. Colombel, A. Darfeuille-Michaud, CEACAM6 acts as a receptor for adherent-invasive *E. coli*, supporting ileal mucosa colonization in Crohn disease, *The Journal of clinical investigation* 117 (2007) 1566-1574.

1  
2  
3  
4 **6. Tables**  
5  
6

7 **Table 1. Seven *E. coli* pathovars, the non-virulent *E. coli* K12 strain, and their basic traits.**  
8

9  
10  
11  
12  
13  
14  
15  
16  
17  
18  
19  
20  
21  
22  
23  
24  
25  
26  
27  
28  
29  
30  
31  
32  
33  
34  
35  
36  
37  
38  
39  
40  
41  
42  
43  
44  
45  
46  
47  
48  
49  
50  
51  
52  
53  
54  
55  
56  
57  
58  
59  
60  
61  
62  
63  
64  
65

| Strain     | Abbr. | Genome size (Mbp) | # of Proteins | Host Location        | Pathological condition                   | Pathovar Type |
|------------|-------|-------------------|---------------|----------------------|------------------------------------------|---------------|
| 55989      | 559   | 5.15              | 4,759         | Extracellular        | Diarrhoea                                | EAEC          |
| ABU 83972  | ABU   | 5.13              | 4,796         | Intracellular        | Bacteremia                               | UPEC          |
| APEC O1    | APE   | 5.50              | 4,853         | Intracellular        | Respiratory infection (avians)           | AIEC          |
| CFT073     | CFT   | 5.23              | 5,369         | Intracellular        | Urinary tract infection & pyelonephritis | UPEC          |
| E24377A    | E24   | 5.25              | 4,991         | Extracellular        | Enterotoxicity                           | ETEC          |
| UMN026     | UMN   | 5.36              | 5,014         | Extra/Intra-cellular | Urinary tract infection                  | UPEC          |
| O157:H7    | O15   | 5.70              | 5,477         | Extracellular        | Haemorrhagic colitis                     | EHEC          |
| K12 MG1655 | K12   | 4.64              | 4,290         | Extracellular        | None                                     | Non-virulent  |

**Table 2. Numbers of proteins (even numbered columns) and percent distribution of subclasses by TC number (odd numbered columns) for all eight strains of *E. coli* as well as numbers of transport proteins per strain (bottom) and all strains combined, with and without K12 (last four columns).**

| Subclass | 559  | %    | CFT  | %    | ABU  | %    | APE  | %    | E24  | %    | UMN  | %    | O15  | %     | K12  | %    | all  | %    | All-K12 | %    |
|----------|------|------|------|------|------|------|------|------|------|------|------|------|------|-------|------|------|------|------|---------|------|
| 9.A      | 42   | 3.4  | 37   | 2.9  | 41   | 3.2  | 41   | 3.3  | 42   | 3.5  | 39   | 3.1  | 42   | 3.47  | 39   | 3.5  | 323  | 3.3  | 284     | 3.3  |
| 10.B     | 94   | 7.6  | 103  | 8.0  | 108  | 8.4  | 91   | 7.3  | 89   | 7.4  | 95   | 7.5  | 96   | 7.93  | 67   | 5.9  | 743  | 7.5  | 676     | 7.7  |
| 11.C     | 15   | 1.2  | 18   | 1.4  | 20   | 1.6  | 15   | 1.2  | 11   | 0.9  | 15   | 1.2  | 21   | 1.74  | 9    | 0.8  | 124  | 1.3  | 115     | 1.3  |
| 12.E     | 5    | 0.4  | 6    | 0.5  | 4    | 0.3  | 6    | 0.5  | 3    | 0.2  | 7    | 0.6  | 14   | 1.16  | 4    | 0.4  | 49   | 0.5  | 45      | 0.5  |
| 13.A     | 318  | 25.6 | 325  | 25.4 | 319  | 24.8 | 315  | 25.3 | 309  | 25.7 | 319  | 25.2 | 299  | 24.71 | 311  | 27.6 | 2515 | 25.5 | 2204    | 25.2 |
| 15.C     | 5    | 0.4  | 5    | 0.4  | 4    | 0.3  | 4    | 0.3  | 3    | 0.2  | 4    | 0.3  | 3    | 0.25  | 4    | 0.4  | 32   | 0.3  | 28      | 0.3  |
| 16.A     | 358  | 28.8 | 378  | 29.5 | 386  | 30.0 | 369  | 29.7 | 353  | 29.4 | 390  | 30.8 | 369  | 30.50 | 340  | 30.1 | 2943 | 29.8 | 2603    | 29.8 |
| 18.B     | 4    | 0.3  | 3    | 0.2  | 5    | 0.4  | 5    | 0.4  | 5    | 0.4  | 4    | 0.3  | 4    | 0.33  | 4    | 0.4  | 34   | 0.3  | 30      | 0.3  |
| 19.D     | 69   | 5.5  | 66   | 5.2  | 64   | 5.0  | 59   | 4.7  | 69   | 5.7  | 72   | 5.7  | 68   | 5.62  | 69   | 6.1  | 536  | 5.4  | 467     | 5.3  |
| 20.A     | 56   | 4.5  | 62   | 4.8  | 62   | 4.8  | 61   | 4.9  | 55   | 4.6  | 61   | 4.8  | 51   | 4.21  | 49   | 4.3  | 457  | 4.6  | 408     | 4.7  |
| 22.B     | 2    | 0.2  | 4    | 0.3  | 4    | 0.3  | 4    | 0.3  | 2    | 0.2  | 2    | 0.2  | 2    | 0.17  | 2    | 0.2  | 22   | 0.2  | 20      | 0.2  |
| 23.C     | 10   | 0.8  | 17   | 1.3  | 16   | 1.2  | 11   | 0.9  | 9    | 0.7  | 11   | 0.9  | 7    | 0.58  | 8    | 0.7  | 89   | 0.9  | 81      | 0.9  |
| 24.D     | 9    | 0.7  | 10   | 0.8  | 12   | 0.9  | 9    | 0.7  | 8    | 0.7  | 7    | 0.6  | 9    | 0.74  | 8    | 0.7  | 72   | 0.7  | 64      | 0.7  |
| 26.A     | 43   | 3.5  | 44   | 3.4  | 44   | 3.4  | 45   | 3.6  | 42   | 3.5  | 43   | 3.4  | 43   | 3.55  | 45   | 4.0  | 349  | 3.5  | 304     | 3.5  |
| 27.B     | 3    | 0.2  | 2    | 0.2  | 2    | 0.2  | 2    | 0.2  | 2    | 0.2  | 4    | 0.3  | 3    | 0.25  | 3    | 0.3  | 21   | 0.2  | 18      | 0.2  |
| 28.A     | 37   | 3.0  | 45   | 3.5  | 43   | 3.3  | 40   | 3.2  | 39   | 3.2  | 42   | 3.3  | 37   | 3.06  | 33   | 2.9  | 316  | 3.2  | 283     | 3.2  |
| 30.B     | 1    | 0.1  | 1    | 0.1  | 1    | 0.1  | 1    | 0.1  | 1    | 0.1  | 1    | 0.1  | 1    | 0.08  | 1    | 0.1  | 8    | 0.1  | 7       | 0.1  |
| 31.A     | 87   | 7.0  | 64   | 5.0  | 63   | 4.9  | 77   | 6.2  | 71   | 5.9  | 66   | 5.2  | 60   | 4.96  | 42   | 3.7  | 530  | 5.4  | 488     | 5.6  |
| 32.B     | 86   | 6.9  | 91   | 7.1  | 89   | 6.9  | 88   | 7.1  | 89   | 7.4  | 85   | 6.7  | 81   | 6.69  | 90   | 8.0  | 699  | 7.1  | 609     | 7.0  |
| 34.Total | 1244 | 100  | 1281 | 100  | 1287 | 100  | 1243 | 100  | 1202 | 100  | 1267 | 100  | 1210 | 100   | 1128 | 100  | 9862 | 100  | 8734    | 100  |

1  
2  
3  
4  
5  
6  
7  
8  
9  
10  
11  
12  
13  
14  
15  
16  
17  
18  
19  
20  
21  
22  
23  
24  
25  
26  
27  
28  
29  
30  
31  
32  
33  
34  
35  
36  
37  
38  
39  
40  
41  
42  
43  
44  
45  
46  
47  
48  
49

**Table 3. Toxins identified in *E. coli* pathovars and K12.**

| Family                                   | TC ID      | Function                              | 559 | ABU | APE | CFT | E24 | UMN | O15 | K12 |
|------------------------------------------|------------|---------------------------------------|-----|-----|-----|-----|-----|-----|-----|-----|
| HlyE                                     | 1.C.10.1.1 | Pore-forming haemolysin, HlyE         | 0   | 1   | 0   | 1   | 0   | 1   | 1   | 1   |
| RTX toxin                                | 1.C.11.1.3 | Pore-forming haemolysin, HlyA         | 0   | 2   | 0   | 1   | 0   | 0   | 0   | 0   |
| IIITCP                                   | 1.C.36.1.1 | T3SS: pore-forming complex, EspBD     | 0   |     | 0   | 0   | 0   | 0   | 2   | 0   |
| IIITCP                                   | 1.C.36.3.1 | T3SS: pore-forming complex, SipBD     | 0   | 0   | 0   | 0   | 0   | 2   | 0   | 0   |
| IIITCP                                   | and 3.2    | T3SS: pore-forming complex, SipBD     | 0   | 0   | 0   | 0   | 0   | 0   | 1   | 0   |
| IIITCP                                   | 1.C.36.5.1 | T3SS: pore-forming complex, SseBCD    | 0   | 0   | 0   | 0   | 0   | 0   | 2   | 0   |
| Shiga toxin B                            | 1.C.54.1.1 | Shiga toxin B, St-B                   | 0   | 0   | 0   | 0   | 0   | 0   | 1   | 0   |
|                                          | 1.C.57.3.2 |                                       |     |     |     |     |     |     |     |     |
| Clostridial cytotoxin                    | and 3.3    | Pore formation; necrosis in host, Cnf | 0   | 1   | 0   | 0   | 0   | 0   | 1   | 0   |
| S-PFT                                    | 1.C.75.1.1 | Pore-forming haemolysin, ShlA         | 0   | 1   | 0   | 1   | 0   | 0   | 1   | 0   |
| Cytotoxic major fimbrial subunit (Mrx-A) | 1.C.80.1.1 | Adhesive fimbriae (pore formation)    | 2   | 4   | 3   | 5   | 2   | 2   | 4   | 2   |
| Cytolethal distending toxin              | 1.C.98.1.1 | Cell cycle arrest/apoptosis, CdtABC   | 0   | 0   | 3   | 0   | 0   | 0   | 0   | 0   |

1  
2  
3  
4  
5  
6  
7  
8  
9  
10  
11  
12  
13  
14  
15  
16  
17  
18  
19  
20  
21  
22  
23  
24  
25  
26  
27  
28  
29  
30  
31  
32  
33  
34  
35  
36  
37  
38  
39  
40  
41  
42  
43  
44  
45  
46  
47  
48  
49

**Table 4. Pathogenicity-related transenvelope protein secretion systems.**

| Family | TC ID                 | Function                                          | 559 | ABU | APE | CFT | E24 | UMN | O15 | K12 |
|--------|-----------------------|---------------------------------------------------|-----|-----|-----|-----|-----|-----|-----|-----|
| T1SS   | 3.A.1.105.3 and 105.4 | Drug Exporter 1                                   | 8   | 8   | 8   | 8   | 7   | 8   | 8   | 8   |
|        | 3.A.1.109.4           | Protein Exporter 1                                | 0   | 4   | 0   | 4   | 0   | 2   | 2   | 0   |
|        | 3.A.1.110.1           | Protein Exporter 2                                | 0   | 3   | 0   | 4   | 0   | 0   | 0   | 0   |
|        | 3.A.1.113.3           | Peptide 3 Exporter                                | 1   | 1   | 1   | 1   | 1   | 1   | 1   | 1   |
|        | 3.A.1.134.7           | Peptide 7 Exporter                                | 15  | 14  | 13  | 14  | 13  | 13  | 14  | 13  |
| T2SS   | 3.A.5.1.1             | SEC-SRP complex                                   | 7   | 7   | 7   | 7   | 7   | 7   | 7   | 7   |
| GSP    |                       |                                                   |     |     |     |     |     |     |     |     |
| MTB    | 3.A.15.1.1            | Pullulanase secretion system                      | 8   | 13  | 14  | 8   | 8   | 7   | 0   | 8   |
|        | 3.A.15.2.1            | Pilin secretion/fimbrial assembly system          | 5   | 4   | 4   | 3   | 4   | 5   | 4   | 4   |
|        | 3.A.15.3.1            | LSP/ fimbrial assembly system                     | 0   | 0   | 0   | 1   | 0   | 1   | 0   | 0   |
| T3SS   | 3.A.6.1.1             | Type III Secretion System Complex                 | 4   | 1   | 1   | 1   | 6   | 8   | 13  | 1   |
|        | 3.A.6.2.1             | Flagellar Protein Export Complex                  | 11  | 11  | 11  | 11  | 11  | 17  | 11  | 10  |
| T4SS   | 3.A.7.3.1             | Pertussis Toxin Exporter                          | 0   | 0   | 0   | 0   | 0   | 4   | 0   | 0   |
|        | 3.A.7.7.1             | Trs DNA Transfer Protein Complex                  | 2   | 2   | 2   | 2   | 2   | 2   | 2   | 2   |
|        | 3.A.7.11.1            | Type IV Beta-Proteobacterial DNA Secretion System | 2   | 1   | 4   | 1   | 2   | 2   | 3   | 1   |
|        | 3.A.7.13.2            | Plasmid pLS20 Conjugation System                  | 1   | 2   | 2   | 1   | 1   | 2   | 1   | 1   |
|        | 3.A.7.14.2            | Conjugation System Plasmid DNA IntP/TcpA-J        | 5   | 4   | 3   | 5   | 5   | 4   | 5   | 5   |
| T6SS   | 3.A.23.1.1            | T6SS VasA-L                                       | 19  | 8   | 18  | 7   | 17  | 13  | 13  | 0   |
|        | 3.A.23.2.1            | T6SS EvpA-P                                       | 19  | 5   | 6   | 5   | 6   | 2   | 2   | 1   |

1  
2  
3  
4  
5  
6  
7  
8  
9  
10  
11  
12  
13  
14  
15  
16  
17  
18  
19  
20  
21  
22  
23  
24  
25  
26  
27  
28  
29  
30  
31  
32  
33  
34  
35  
36  
37  
38  
39  
40  
41  
42  
43  
44  
45  
46  
47  
48  
49

**Table 5. Outer membrane protein secretion systems.**

| Family   | TC ID                             | Function                                                               | 559 | ABU | APE | CFT | E24 | UMN | O15 | K12 |
|----------|-----------------------------------|------------------------------------------------------------------------|-----|-----|-----|-----|-----|-----|-----|-----|
| FUP      | 1.B.11.2.1 and 2.2                | Type $\pi$ fimbrial usher protein, PapC and YbgQ                       | 3   | 3   | 3   | 4   | 3   | 3   | 2   | 1   |
|          | 1.B.11.3.2, 3.3, 3.5, 3.6 and 3.9 | Type $\gamma$ fimbrial usher protein, MrkC, EcpC, YcbS, YraJ, and FimD | 8   | 8   | 5   | 6   | 6   | 8   | 7   | 6   |
| AT-1     | 1.B.11.4.1                        | Type $\alpha$ fimbrial usher protein, CfaC                             | 2   | 1   | 1   | 1   | 2   | 1   | 1   | 1   |
|          | 1.B.12.1.1                        | Adhesin, AidA                                                          | 1   | 1   | 1   | 1   | 1   | 1   | 1   | 2   |
|          | 1.B.12.1.2                        | Virulence factor, IcsA (VirG)                                          | 2   | 2   | 0   | 2   | 2   | 0   | 1   | 0   |
|          | 1.B.12.1.3                        | Fibronectin binding protein, MisL                                      | 1   | 0   | 1   | 1   | 1   | 2   | 1   | 0   |
|          | 1.B.12.2.1                        | Pertactin, Ptt                                                         | 1   | 0   | 0   | 0   | 1   | 1   | 0   | 1   |
|          | 1.B.12.2.2                        | Tracheal colonization factor, TcfA                                     | 1   | 1   | 1   | 1   | 1   | 1   | 0   | 0   |
|          | 1.B.12.2.3                        | Resistance to killing proteins, BrkA                                   | 0   | 0   | 1   | 0   | 0   | 0   | 0   | 0   |
|          | 1.B.12.2.4                        | Putative adhesin/protease/pertactin                                    | 2   | 3   | 1   | 3   | 0   | 1   | 0   | 0   |
|          | 1.B.12.4.2 and 4.3                | Serine proteases, EspP and Tsh                                         | 3   | 3   | 1   | 3   | 0   | 1   | 1   | 0   |
|          | 1.B.12.5.5                        | Virulence factor, BigA                                                 | 0   | 1   | 1   | 0   | 0   | 1   | 0   | 0   |
|          | 1.B.12.8.2                        | Auto-aggregation adhesin, Flu                                          | 1   | 3   | 1   | 3   | 2   | 1   | 1   | 1   |
|          | 1.B.12.8.3                        | Adhesin, TibA                                                          | 2   | 2   | 2   | 1   | 2   | 3   | 3   | 1   |
| OMF      | 1.B.17.1.1 and 1.4                | Hemolysin, drug and siderophore export protein, TolC                   | 1   | 1   | 1   | 1   | 1   | 2   | 2   | 1   |
|          | 1.B.17.3.9                        | Multidrug resistance outer membrane export protein, MdtP               | 1   | 1   | 1   | 1   | 1   | 1   | 1   | 0   |
| TPS      | 1.B.20.1.3 and 1.4                | Two-partner secretion exporter, CdiB and OptB                          | 0   | 1   | 0   | 0   | 0   | 0   | 2   | 0   |
| Secretin | 1.B.22.1.1                        | PulD secretin                                                          | 1   | 2   | 2   | 1   | 1   | 1   | 0   | 1   |
|          | 1.B.22.3.3                        | YscC secretin                                                          | 0   | 0   | 0   | 0   | 0   | 1   | 2   | 0   |
|          | 1.B.22.4.2                        | HofQ secretin                                                          | 1   | 1   | 1   | 1   | 1   | 1   | 1   | 1   |
|          | 1.B.22.5.1                        | Phage gene IV protein secretin                                         | 0   | 0   | 0   | 0   | 1   | 0   | 0   | 0   |
| OMIP     | 1.B.33.1.3                        | Outer membrane insertion complex                                       | 6   | 6   | 6   | 6   | 6   | 6   | 6   | 6   |
| AT-2     | 1.B.40.1.2                        | Haemagglutinin                                                         | 0   | 0   | 0   | 0   | 0   | 1   | 1   | 0   |



1  
2  
3  
4  
5  
6  
7  
8  
9  
10  
11  
12  
13  
14  
15  
16  
17  
18  
19  
20  
21  
22  
23  
24  
25  
26  
27  
28  
29  
30  
31  
32  
33  
34  
35  
36  
37  
38  
39  
40  
41  
42  
43  
44  
45  
46  
47  
48  
49

|      |            |                                                   |   |   |   |   |   |   |   |   |
|------|------------|---------------------------------------------------|---|---|---|---|---|---|---|---|
| CsgA | 1.B.40.1.3 | Adhesin, YadB                                     | 0 | 0 | 0 | 0 | 0 | 0 | 1 | 0 |
|      | 1.B.40.1.5 | Adhesin, Cha                                      | 0 | 0 | 1 | 0 | 0 | 1 | 0 | 0 |
|      | 1.B.40.2.3 | Adhesin, UpaG                                     | 1 | 1 | 1 | 1 | 1 | 0 | 1 | 0 |
|      | 1.B.48.1.1 | Curli fiber subunit, CsgA                         | 1 | 1 | 1 | 1 | 1 | 1 | 1 | 1 |
| AT-3 | 1.B.54.1.1 | Intimin/Invasin (putative autotransporter-3), Eae | 2 | 5 | 4 | 4 | 4 | 5 | 4 | 2 |

1  
2  
3  
4  
5  
6  
7  
8  
9  
10  
11  
12  
13  
14  
15  
16  
17  
18  
19  
20  
21  
22  
23  
24  
25  
26  
27  
28  
29  
30  
31  
32  
33  
34  
35  
36  
37  
38  
39  
40  
41  
42  
43  
44  
45  
46  
47  
48  
49

**Table 6. Outer membrane iron-siderophore receptors.**

| Family | TC ID       | Receptor Specificity         | 559 | ABU | APE | CFT | E24 | UMN | O15 | K12 |
|--------|-------------|------------------------------|-----|-----|-----|-----|-----|-----|-----|-----|
| OMR    | 1.B.14.1.1  | Ferric coprogen, FhuE        | 1   | 1   | 1   | 1   | 1   | 1   | 1   | 1   |
|        | 1.B.14.1.2  | Ferrichrome, FhuA            | 1   | 1   | 1   | 1   | 1   | 1   | 1   | 1   |
|        | 1.B.14.1.3  | Ferric enterobactin, IroN    | 0   | 1   | 0   | 1   | 0   | 0   | 0   | 0   |
|        | 1.B.14.1.4  | Catecholate, CirA            | 1   | 2   | 2   | 3   | 1   | 1   | 2   | 1   |
|        | 1.B.14.1.9  | Catecholate, Flu             | 1   | 1   | 1   | 1   | 1   | 1   | 1   | 1   |
|        | 1.B.14.1.10 | Ferroxamine, FoxA            | 0   | 1   | 1   | 1   | 0   | 0   | 1   | 0   |
|        | 1.B.14.1.12 | Ferric citrate, FecA         | 1   | 1   | 0   | 0   | 1   | 1   | 0   | 1   |
|        | 1.B.14.1.13 | Ferric receptor, CfrA        | 1   | 1   | 0   | 1   | 0   | 1   | 1   | 0   |
|        | 1.B.14.1.15 | Ferrichrome, FcuA            | 0   | 1   | 0   | 1   | 0   | 0   | 0   | 0   |
|        | 1.B.14.2.2  | Heme, Hema                   | 0   | 2   | 1   | 2   | 0   | 1   | 1   | 0   |
|        | 1.B.14.3.1  | Cobalamin, BtuB              | 1   | 1   | 1   | 1   | 1   | 1   | 1   | 1   |
|        | 1.B.14.4.1  | Cupric ion, OprC             | 0   | 1   | 1   | 1   | 0   | 1   | 0   | 0   |
|        | 1.B.14.7.2  | Ferric-yersinabactin, FyuA   | 2   | 2   | 2   | 1   | 1   | 2   | 1   | 1   |
|        | 1.B.14.9.3  | Ferrichrome/Aerobactin, IutA | 1   | 1   | 0   | 1   | 0   | 1   | 0   | 0   |
|        | 2.C.1.1.1   | TonB                         | 1   | 2   | 2   | 2   | 1   | 2   | 1   | 1   |
|        | 2.C.1.2.1   | TolA                         | 3   | 2   | 2   | 1   | 2   | 2   | 2   | 1   |

1  
2  
3  
4  
5  
6  
7  
8  
9  
10  
11  
12  
13  
14  
15  
16  
17  
18  
19  
20  
21  
22  
23  
24  
25  
26  
27  
28  
29  
30  
31  
32  
33  
34  
35  
36  
37  
38  
39  
40  
41  
42  
43  
44  
45  
46  
47  
48  
49

| <b>Table 7. Inner membrane iron uptake systems.</b> |                   |                                              |           |           |           |           |           |           |           |           |
|-----------------------------------------------------|-------------------|----------------------------------------------|-----------|-----------|-----------|-----------|-----------|-----------|-----------|-----------|
| Family                                              | TC ID             | Function                                     | 559       | ABU       | APE       | CFT       | E24       | UMN       | O15       | K12       |
| CorA                                                | 1.A.35.2.1        | Divalent cation transport                    | 2         | 2         | 2         | 2         | 2         | 2         | 2         | 2         |
| ZIP                                                 | 2.A.5.5.1         | Pmf-mediated M <sup>2+</sup> uptake          | 1         | 1         | 1         | 1         | 1         | 1         | 1         | 1         |
| Nramp                                               | 2.A.55.3.1        | Divalent cation:H <sup>+</sup> symport       | 1         | 1         | 1         | 1         | 1         | 1         | 1         | 1         |
| FeoB                                                | 9.A.8.1.1 and 1.9 | GTPase-coupled ferrous iron uptake           | 2         | 2         | 2         | 2         | 2         | 2         | 2         | 2         |
| FeT                                                 | 3.A.1.10.3        | Ferric iron uptake                           | 1         | 1         | 1         | 1         | 1         | 1         | 1         | 1         |
| FeCT                                                | 3.A.1.14.1        | Ferric iron-dicitrate uptake                 | 4         | 4         | 0         | 0         | 4         | 4         | 0         | 4         |
|                                                     | 3.A.1.14.2        | Ferric iron-enterobactin uptake              | 4         | 8         | 4         | 8         | 4         | 4         | 4         | 4         |
|                                                     | 3.A.1.14.3        | Ferric iron-hydroxamate uptake               | 3         | 3         | 3         | 3         | 3         | 3         | 3         | 3         |
|                                                     | 3.A.1.14.8        | Ferric-vibrioferrin uptake                   | 0         | 2         | 2         | 2         | 0         | 1         | 1         | 0         |
|                                                     | 3.A.1.14.18       | Heme uptake                                  | 0         | 3         | 3         | 3         | 0         | 3         | 3         | 0         |
|                                                     | 3.A.1.14.21       | Heme uptake                                  | 0         | 2         | 0         | 2         | 0         | 0         | 0         | 0         |
| MZT                                                 | 3.A.1.15.7        | Mn <sup>2+</sup> and Fe <sup>2+</sup> uptake | 0         | 5         | 4         | 5         | 0         | 4         | 0         | 0         |
| BIT                                                 | 3.A.1.20.1        | Iron uptake complex                          | 0         | 0         | 0         | 0         | 0         | 0         | 3         | 0         |
| <b>Total</b>                                        |                   |                                              | <b>16</b> | <b>32</b> | <b>21</b> | <b>30</b> | <b>16</b> | <b>24</b> | <b>19</b> | <b>16</b> |

1  
2  
3  
4  
5  
6  
7  
8  
9  
10  
11  
12  
13  
14  
15  
16  
17  
18  
19  
20  
21  
22  
23  
24  
25  
26  
27  
28  
29  
30  
31  
32  
33  
34  
35  
36  
37  
38  
39  
40  
41  
42  
43  
44  
45  
46  
47  
48  
49

**Table 8. Metabolite transporters unique to intracellular vs. extracellular pathogens.**

| Family    | TCID         | Function                            | Exclusively in 2 of 3 intracellular pathovars | Exclusively in all 3 intracellular pathovars | Exclusively in extracellular pathovars |
|-----------|--------------|-------------------------------------|-----------------------------------------------|----------------------------------------------|----------------------------------------|
| E-CIC     | 1.A.13.2.3   | Chloride efflux                     |                                               | x                                            |                                        |
| TEGT      | 1.A.14.2.2   | Acetate transport                   |                                               | x                                            |                                        |
| FNT       | 1.A.16.1.2   | Formate transport                   |                                               |                                              | x                                      |
| OMF porin | 1.B.6.1.2    | Solute diffusion                    |                                               | x                                            |                                        |
| Tsx       | 1.B.10.1.1   | Nucleoside-specific channel         |                                               | x                                            |                                        |
| FUP       | 1.B.11.2.1   | Type $\pi$ fimbrial export          |                                               | x                                            |                                        |
|           | 1.B.11.2.2   | Putative fimbrial export            |                                               | x                                            |                                        |
|           | 1.B.11.3.3   | Type $\gamma$ fimbrial export       |                                               | x                                            |                                        |
|           | 1.B.11.3.5   | Type $\gamma$ fimbrial export       |                                               | x                                            |                                        |
|           | AT-1         | 1.B.12.1.1**                        | Adhesin export                                |                                              | x                                      |
| AT-1      | 1.B.12.2.1   | Pertactin (adhesin) export          |                                               |                                              | x                                      |
|           | 1.B.12.2.2** | Tracheal colonization factor export |                                               | x                                            |                                        |
|           | 1.B.12.4.1   | Protease export                     |                                               | x                                            |                                        |
|           | 1.B.12.8.2** | Adhesin export                      |                                               |                                              | x                                      |
| AT-1      | 1.B.12.8.3   | Adhesin/invasin export              |                                               | x                                            |                                        |
|           | OMF          | 1.B.17.3.4*                         | Metal cation (Ag <sup>+</sup> )               |                                              | x                                      |

1  
2  
3  
4  
5  
6  
7  
8  
9  
10  
11  
12  
13  
14  
15  
16  
17  
18  
19  
20  
21  
22  
23  
24  
25  
26  
27  
28  
29  
30  
31  
32  
33  
34  
35  
36  
37  
38  
39  
40  
41  
42  
43  
44  
45  
46  
47  
48  
49

|                        |              |                                   |   |   |   |
|------------------------|--------------|-----------------------------------|---|---|---|
|                        |              | export                            |   |   |   |
| OMA                    | 1.B.18.1.2   | Polysaccharide export             |   |   | x |
| Gene IV secretin (OMS) | 1.B.22.5.1*  | Phage export                      |   |   | x |
| OmpL porin             | 1.B.35.2.2   | Small molecule transport          |   |   | x |
| AT-2                   | 1.B.40.1.2*  | Haemagglutinin export             |   |   | x |
|                        | 1.B.40.1.3*  | Adhesin (YadB) export             |   |   | x |
| AT-3 (Int/Inv)         | 1.B.54.1.1*  | $\gamma$ -Intimin export          |   |   | x |
|                        | 1.B.54.1.2** | Invasin export                    |   | x |   |
| IIITCP (EspB/D)        | 1.C.36.1.1   | Host pore for T3SS                |   |   | x |
| ST-B                   | 1.C.54.1.1*  | STX pore-forming virulence factor |   |   | x |
| Cnt2                   | 1.C.57.3.3*  | Pore-forming virulence factor     |   |   | x |
| Lambda holin           | 1.E.2.1.4*   | Holin; autolysis                  |   |   | x |
| OMR                    | 1.E.14.1.9   | Holin; autolysis                  |   | x |   |
| MFS, SP                | 2.A.1.1.3    | Monosaccharide uptake             |   |   | x |
| MFS; DHA1              | 2.A.1.2.7    | Drug efflux                       |   | x |   |
| MFS; DHA1              | 2.A.1.2.52   | Drug efflux                       |   |   | x |
| MFS; DHA2              | 2.A.1.3.18   | Efflux of signaling molecules     | x |   |   |

1  
2  
3  
4  
5  
6  
7  
8  
9  
10  
11  
12  
13  
14  
15  
16  
17  
18  
19  
20  
21  
22  
23  
24  
25  
26  
27  
28  
29  
30  
31  
32  
33  
34  
35  
36  
37  
38  
39  
40  
41  
42  
43  
44  
45  
46  
47  
48  
49

|                                     |             |                                          |   |   |   |
|-------------------------------------|-------------|------------------------------------------|---|---|---|
| MFS; OPA                            | 2.A.1.4.2   | Glycolytic intermediate uptake           | x |   |   |
| MFS; MHS                            | 2.A.1.6.1*  | Tricarboxylate uptake                    |   | x |   |
|                                     | 2.A.1.6.9   | Metabolite uptake                        |   | x |   |
| MFS; ACS                            | 2.A.1.14.2  | Hexuronate uptake                        |   | x |   |
| MFS; AAHS                           | 2.A.1.15.2  | Aromatic acid uptake                     |   |   | x |
| MFS; CP                             | 2.A.1.17.1  | Cyanate uptake                           |   |   | x |
| GPH                                 | 2.A.2.1.1   | Disaccharide uptake                      |   |   | x |
|                                     | 2.A.2.3.9*  | Glycoside uptake                         |   |   | x |
| APC                                 | 2.A.3.1.13  | Putrescine (polyamine) uptake            |   |   | x |
|                                     | 2.A.3.2.7   | Arginine uptake; acid homeostasis        | x |   |   |
|                                     | 2.A.3.7.2   | Glutamate uptake; acid homeostasis       |   |   | x |
|                                     | 2.A.3.8.17  | Amino acid derivative uptake             |   |   | x |
| RND                                 | 2.A.6.2.19* | Drug export                              |   | x |   |
|                                     | 2.A.6.2.6   | Drug/autoinducer efflux                  | x |   |   |
| Betaine/carnitine/choline symporter | 2.A.15.2.3  | Organoamine uptake                       |   |   | x |
| CPA1                                | 2.A.36.3.1  | Na <sup>+</sup> :H <sup>+</sup> antiport |   | x |   |
| CNT                                 | 2.A.41.2.10 | Nucleoside uptake                        |   |   | x |
| DASS                                | 2.A.47.3.2  | Citrate uptake; succinate export         |   | x |   |
|                                     | 2.A.47.4.2  | Arsenite/antimonite                      |   | x |   |

1  
2  
3  
4  
5  
6  
7  
8  
9  
10  
11  
12  
13  
14  
15  
16  
17  
18  
19  
20  
21  
22  
23  
24  
25  
26  
27  
28  
29  
30  
31  
32  
33  
34  
35  
36  
37  
38  
39  
40  
41  
42  
43  
44  
45  
46  
47  
48  
49

|           |              |  |                                                       |   |   |   |
|-----------|--------------|--|-------------------------------------------------------|---|---|---|
|           |              |  | export                                                |   |   |   |
| SulP      | 2.A.53.3.8   |  | Bicarbonate uptake                                    |   |   | X |
| TRAP-T    | 2.A.56.1.5** |  | Rhamnogalacturonide uptake                            |   | X |   |
|           | 2.A.56.1.6   |  | Sialic acid uptake                                    |   | X |   |
| DcuC      | 2.A.61.1.2*  |  | Dicarboxylate antiport                                |   |   | X |
| PST       | 2.A.66.2.10  |  | Lipopolysaccharide precursor export                   | X |   |   |
| AbgT      | 2.A.68.1.1   |  | p-Aminobenzoyl-glutamate uptake                       |   |   | X |
| TTT       | 2.A.80.1.1   |  | Tricarboxylate uptake                                 |   | X |   |
| ABC; CUT2 | 3.A.1.2.1**  |  | Ribose uptake                                         |   | X |   |
|           | 3.A.1.2.8    |  | Sugar uptake                                          |   |   | X |
|           | 3.A.1.2.11** |  | Sugar alcohol uptake                                  |   | X |   |
|           | 3.A.1.2.13   |  | Autoinducer-2 uptake                                  |   | X |   |
| ABC; PepT | 3.A.1.5.12   |  | Rhamnose oligosaccharide uptake                       |   |   | X |
|           | 3.A.1.5.20   |  | Oligopeptide uptake                                   |   | X |   |
| ABC; LPT  | 3.A.1.125.2  |  | Lipoprotein export                                    |   |   | X |
| ArsAB     | 3.A.4.1.1*   |  | Arsenite export                                       |   |   | X |
| NDH       | 3.D.1.9.1*   |  | H <sup>+</sup> /K <sup>+</sup> exchange (Hydrogenase) |   |   | X |
|           |              |  | H <sup>+</sup> export;                                |   |   |   |
| NFO       | 3.D.6.1.2    |  | NADH:ferridoxin oxido-reductase                       |   |   | X |
| PTS; Glc  | 4.A.1.1.3    |  | Maltose uptake                                        |   | X |   |
|           | 4.A.1.1.9    |  | Glucose uptake                                        |   | X |   |
|           | 4.A.1.1.10   |  | Glucose uptake                                        |   |   | X |

1  
2  
3  
4  
5  
6  
7  
8  
9  
10  
11  
12  
13  
14  
15  
16  
17  
18  
19  
20  
21  
22  
23  
24  
25  
26  
27  
28  
29  
30  
31  
32  
33  
34  
35  
36  
37  
38  
39  
40  
41  
42  
43  
44  
45  
46  
47  
48  
49

|                   |              |                                                      |   |  |   |
|-------------------|--------------|------------------------------------------------------|---|--|---|
| PTS; Fru          | 4.A.2.1.3*   | 2-O- $\alpha$ -<br>Mannosyl-D<br>glycerate<br>uptake |   |  | x |
|                   | 4.A.2.1.6*   | Mannose<br>uptake                                    |   |  | x |
|                   | 4.A.2.1.9    | Keto sugar<br>uptake                                 | x |  |   |
| PTS; Gut          | 4.A.4.1.2    | Sugar<br>alcohol<br>(glucitol)<br>uptake             |   |  | x |
| PTS; Gat          | 4.A.5.1.3    | Sugar<br>alcohol<br>(galactitol)<br>uptake           |   |  | x |
| PnuC              | 4.B.1.1.4    | Coenzyme<br>precursor<br>(thiamin)<br>uptake         | x |  |   |
| DUF318            | 9.B.28.1.1*  | Unknown                                              |   |  | x |
| YiaW;<br>DUF3302  | 9.B.32.1.2*  | Unknown                                              |   |  | x |
| UIT3              | 9.B.50.1.2** | Possible<br>dicarboxylate<br>uptake                  | x |  |   |
| DUF805            | 9.B.124.1.1* | Unknown                                              |   |  | x |
| DUF805<br>protein | 9.B.124.1.4  | Unknown                                              | x |  |   |



1  
2  
3  
4  
5  
6  
7  
8  
9  
10  
11  
12  
13  
14  
15  
16  
17  
18  
19  
20  
21  
22  
23  
24  
25  
26  
27  
28  
29  
30  
31  
32  
33  
34  
35  
36  
37  
38  
39  
40  
41  
42  
43  
44  
45  
46  
47  
48  
49

**Table S1. Occurrence of homologues of recognized transport proteins in the eight strains of *E. coli* included in this study. Blue boxes indicate orthologous relationships for any one protein. Yellow boxes indicate comparison scores that are too low to establish substrate specificity.**

| NCBI Acc. #    | 559 | ABU | APEC | CFT | E243 | UMN | O157 | K12 | TCID #     | E-Value | Acc #                  | # orthologs (blue) | Substrate |
|----------------|-----|-----|------|-----|------|-----|------|-----|------------|---------|------------------------|--------------------|-----------|
| YP_002401928.1 | +   | +   | +    | +   | +    | +   | +    | +   | 1.A.1.4.1  | e-06    | <a href="#">Q38998</a> | 8                  | Unknown   |
| YP_006108792.1 | -   | -   | -    | -   | +    | -   | -    | -   | 1.A.1.4.4  | e-07    | <a href="#">Q94A76</a> | 1                  | Unknown   |
| YP_002401751.1 | +   | +   | +    | +   | +    | +   | +    | +   | 1.A.12.3.1 | e-06    | <a href="#">P0ACA3</a> | 8                  | Unknown   |
| YP_002404007.1 | +   | +   | +    | +   | +    | +   | +    | +   | 1.A.12.3.1 | e-06    | <a href="#">P0ACA3</a> | 8                  | Unknown   |
| YP_002404845.1 | -   | -   | -    | -   | +    | -   | +    | -   | 1.A.12.3.1 | e-07    | <a href="#">P0ACA3</a> | 2                  | Unknown   |
| YP_002403089.1 | -   | -   | -    | -   | -    | -   | +    | +   | 1.A.14.2.2 | e-05    | <a href="#">P0AAC4</a> | 2                  | Unknown   |
| YP_002401281.1 | -   | -   | -    | -   | +    | -   | -    | -   | 1.A.14.2.2 | e-05    | <a href="#">P0AAC4</a> | 1                  | Unknown   |
| YP_002401831.1 | +   | -   | -    | -   | -    | -   | -    | -   | 1.A.14.2.2 | e-06    | <a href="#">P0AAC4</a> | 1                  | Unknown   |
| YP_002403920.1 | -   | +   | -    | -   | -    | -   | -    | -   | 1.A.28.2.1 | e-05    | <a href="#">Q9S408</a> | 1                  | Unknown   |
| YP_006106303.1 | +   | -   | -    | -   | +    | +   | -    | +   | 1.A.30.1.5 | e-07    | <a href="#">Q8EAG6</a> | 4                  | Unknown   |
| YP_002403828.1 | +   | +   | +    | +   | +    | +   | +    | +   | 1.A.34.1.1 | e-05    | <a href="#">P71044</a> | 8                  | Unknown   |
| YP_002402711.1 | +   | -   | -    | -   | -    | -   | -    | -   | 1.A.34.1.1 | e-06    | <a href="#">P71044</a> | 1                  | Unknown   |
| YP_002269341.1 | +   | +   | +    | +   | +    | +   | +    | +   | 1.A.34.1.1 | e-07    | <a href="#">P71044</a> | 8                  | Unknown   |
| YP_002331260.1 | +   | +   | +    | +   | +    | +   | +    | +   | 1.A.78.1.1 | e-07    | Q9YS30                 | 8                  | Unknown   |
| YP_002401660.1 | +   | +   | +    | +   | +    | +   | +    | +   | 1.B.12.1.1 | 0.0281  | <a href="#">Q03155</a> | 8                  | Unknown   |
| YP_002403605.1 | +   | -   | -    | -   | -    | -   | -    | -   | 1.B.12.1.1 | e-06    | <a href="#">Q03155</a> | 1                  | Unknown   |
| YP_002401809.1 | -   | +   | +    | +   | -    | -   | -    | -   | 1.B.54.1.2 | e-05    | <a href="#">P11922</a> | 3                  | Unknown   |
| YP_006105298.1 | +   | -   | +    | -   | +    | +   | +    | +   | 1.C.57.3.4 | e-06    | <a href="#">Q7MDK6</a> | 6                  | Unknown   |
| YP_002402085.1 | +   | +   | +    | +   | -    | +   | +    | -   | 1.C.80.1.1 | e-05    | <a href="#">Q8KRT4</a> | 6                  | Unknown   |
| YP_002403600.1 | -   | -   | -    | -   | -    | -   | +    | -   | 1.C.80.1.1 | e-05    | <a href="#">Q8KRT4</a> | 7                  | Unknown   |
| YP_002403249.1 | +   | -   | -    | -   | +    | +   | +    | +   | 1.C.80.1.1 | e-06    | <a href="#">Q8KRT4</a> | 5                  | Unknown   |
| YP_002404399.1 | +   | -   | -    | -   | +    | -   | -    | +   | 1.C.80.1.1 | e-06    | <a href="#">Q8KRT4</a> | 3                  | Unknown   |
| YP_002405494.1 | +   | -   | -    | -   | +    | +   | -    | -   | 1.C.80.1.1 | e-06    | Q8KRT4                 | 3                  | Unknown   |
| YP_002401727.1 | -   | +   | -    | +   | -    | -   | -    | -   | 1.C.80.1.1 | e-06    | <a href="#">Q8KRT4</a> | 2                  | Unknown   |
| YP_002404401.1 | +   | -   | -    | -   | +    | -   | +    | +   | 1.C.80.1.1 | e-07    | <a href="#">Q8KRT4</a> | 4                  | Unknown   |

1  
2  
3  
4  
5  
6  
7  
8  
9  
10  
11  
12  
13  
14  
15  
16  
17  
18  
19  
20  
21  
22  
23  
24  
25  
26  
27  
28  
29  
30  
31  
32  
33  
34  
35  
36  
37  
38  
39  
40  
41  
42  
43  
44  
45  
46  
47  
48  
49

|                |   |   |   |   |   |   |   |   |             |      |                        |   |         |
|----------------|---|---|---|---|---|---|---|---|-------------|------|------------------------|---|---------|
| YP_002402041.1 | + | - | - | - | - | - | - | - | 1.C.80.1.1  | e-07 | <a href="#">Q8KRT4</a> | 1 | Unknown |
| YP_002405801.1 | + | - | - | - | - | - | - | - | 1.C.80.1.1  | e-07 | <a href="#">Q8KRT4</a> | 1 | Unknown |
| YP_002403334.1 | + | + | + | + | - | + | - | - | 2.A.1.25.6  | e-05 | <a href="#">Q9HWG8</a> | 5 | Unknown |
| YP_002331338.1 | + | + | + | + | + | + | + | + | 2.A.21.9.1  | e-05 | <a href="#">Q9HV74</a> | 8 | Unknown |
| YP_002403932.1 | + | + | + | + | + | + | + | + | 2.A.21.9.1  | e-05 | <a href="#">Q9HV74</a> | 8 | Unknown |
| YP_006108894.1 | + | + | + | + | + | + | + | + | 2.A.21.9.1  | e-07 | <a href="#">Q9HV74</a> | 8 | Unknown |
| YP_001463382.1 | + | + | + | + | + | + | + | + | 2.A.37.1.1  | e-05 | <a href="#">P0A754</a> | 8 | Unknown |
| YP_002403325.1 | + | - | - | - | + | - | - | + | 2.A.37.1.1  | e-07 | <a href="#">P0A754</a> | 3 | Unknown |
| YP_006106351.1 | + | - | - | - | + | - | - | - | 2.A.38.4.5  | e-05 | <a href="#">P73948</a> | 2 | Unknown |
| YP_854266.1    | + | + | + | + | + | + | + | + | 2.A.38.4.5  | e-06 | <a href="#">P73948</a> | 8 | Unknown |
| YP_006104401.1 | + | + | + | + | + | + | + | + | 2.A.53.3.4  | e-06 | <a href="#">B9LX9</a>  | 8 | Unknown |
| YP_006106368.1 | - | + | + | + | - | - | - | - | 2.A.56.1.3  | e-07 | <a href="#">P44543</a> | 3 | Unknown |
| YP_002402404.1 | - | - | - | - | + | - | - | - | 2.A.66.4.2  | e-06 | <a href="#">Q65ZW3</a> | 1 | Unknown |
| YP_002403115.1 | + | - | - | - | - | - | - | - | 2.A.66.6.2  | e-05 | <a href="#">A3RZV8</a> | 1 | Unknown |
| YP_002403121.1 | - | + | + | + | - | - | - | - | 2.A.7.21.4  | e-07 | <a href="#">Q3SAW5</a> | 3 | Unknown |
| YP_002401665.1 | - | - | + | + | - | - | - | - | 3.A.1.10.1  | e-07 | <a href="#">P21408</a> | 2 | Unknown |
| YP_002404115.1 | - | - | - | - | + | - | - | - | 3.A.1.105.4 | e-07 | <a href="#">Q4VWD0</a> | 1 | Unknown |
| YP_002413866.1 | - | + | - | + | - | - | - | - | 3.A.1.13.1  | e-05 | <a href="#">Q8ZRP7</a> | 2 | Unknown |
| YP_002402415.1 | - | + | - | + | - | - | - | - | 3.A.1.13.1  | e-05 | <a href="#">Q8ZRP7</a> | 2 | Unknown |
| YP_002403116.1 | + | + | + | + | + | + | + | + | 3.A.1.134.7 | e-05 | <a href="#">A6QEW8</a> | 8 | Unknown |
| YP_006105557.1 | + | + | + | + | + | + | + | + | 3.A.1.134.7 | e-05 | <a href="#">A6QEW8</a> | 8 | Unknown |
| YP_002401216.1 | + | + | + | + | + | + | + | + | 3.A.1.134.7 | e-05 | <a href="#">A6QEW9</a> | 8 | Unknown |
| YP_002403429.1 | + | - | - | - | + | + | + | + | 3.A.1.134.7 | e-05 | <a href="#">A6QEW8</a> | 5 | Unknown |
| YP_002405315.1 | + | - | - | - | + | - | + | + | 3.A.1.134.7 | e-05 | <a href="#">A6QEW8</a> | 4 | Unknown |
| YP_002404100.1 | - | - | - | - | - | + | - | - | 3.A.1.134.7 | e-05 | <a href="#">A6QEW8</a> | 1 | Unknown |
| YP_002404789.1 | + | + | + | + | + | + | + | + | 3.A.1.134.7 | e-06 | <a href="#">A6QEW8</a> | 8 | Unknown |
| YP_002404441.1 | + | + | + | + | + | + | + | + | 3.A.1.134.7 | e-07 | <a href="#">A6QEW8</a> | 8 | Unknown |
| YP_002413661.1 | - | + | + | + | - | + | - | - | 3.A.1.14.1  | e-05 | <a href="#">P15028</a> | 4 | Unknown |

1  
2  
3  
4  
5  
6  
7  
8  
9  
10  
11  
12  
13  
14  
15  
16  
17  
18  
19  
20  
21  
22  
23  
24  
25  
26  
27  
28  
29  
30  
31  
32  
33  
34  
35  
36  
37  
38  
39  
40  
41  
42  
43  
44  
45  
46  
47  
48  
49

|                |   |   |   |   |   |   |   |   |            |        |                        |   |         |
|----------------|---|---|---|---|---|---|---|---|------------|--------|------------------------|---|---------|
| YP_002413646.1 | + | + | + | + | + | + | + | + | 3.A.1.2.1  | e-06   | <a href="#">P02925</a> | 8 | Unknown |
| YP_002404757.1 | + | + | + | + | + | + | + | + | 3.A.1.2.1  | e-06   | <a href="#">P02925</a> | 8 | Unknown |
| YP_006107717.1 | + | + | + | + | + | + | + | + | 3.A.1.2.1  | e-06   | <a href="#">P02925</a> | 8 | Unknown |
| YP_006107352.1 | + | + | + | + | + | + | + | + | 3.A.1.2.1  | e-07   | <a href="#">P02925</a> | 8 | Unknown |
| YP_002327703.1 | + | + | + | + | + | + | + | + | 3.A.1.2.1  | e-07   | <a href="#">P02925</a> | 8 | Unknown |
| YP_854402.1    | + | + | + | + | + | + | + | + | 3.A.1.21.2 | e-06   | <a href="#">P63391</a> | 8 | Unknown |
| YP_002414104.1 | - | - | - | - | - | + | - | - | 3.A.1.5.3  | e-05   | <a href="#">P33590</a> | 1 | Unknown |
| YP_002404335.1 | - | - | - | - | - | + | - | - | 3.A.11.1.1 | e-05   | <a href="#">P39695</a> | 1 | Unknown |
| YP_002403093.1 | + | + | + | + | + | + | + | + | 3.A.11.1.1 | e-06   | <a href="#">P39694</a> | 8 | Unknown |
| YP_002401340.1 | - | + | + | + | - | - | - | + | 3.A.15.1.1 | e-05   | <a href="#">P15643</a> | 4 | Unknown |
| YP_002403852.1 | - | + | - | - | - | - | - | - | 3.A.15.1.1 | e-07   | <a href="#">P15752</a> | 1 | Unknown |
| YP_002332057.1 | - | - | + | - | - | - | - | - | 3.A.15.3.1 | e-05   | <a href="#">Q9XD69</a> | 1 | Unknown |
| YP_002405040.1 | - | - | - | - | - | + | - | - | 3.A.15.3.1 | e-07   | <a href="#">Q9XD69</a> | 1 | Unknown |
| YP_002401919.1 | + | + | - | - | + | - | - | - | 3.A.15.3.1 | e-07   | <a href="#">Q9XD69</a> | 3 | Unknown |
| YP_002404236.1 | + | + | + | + | + | + | + | + | 3.A.16.1.2 | e-07   | <a href="#">P25694</a> | 8 | Unknown |
| YP_002404537.1 | + | + | + | + | + | + | + | + | 3.A.17.1.1 | e-05   | <a href="#">P03726</a> | 8 | Unknown |
| YP_002401851.1 | + | + | + | + | + | + | + | + | 3.A.17.1.1 | e-05   | <a href="#">P03726</a> | 8 | Unknown |
| YP_002403929.1 | + | + | + | + | + | + | + | + | 3.A.17.1.1 | e-06   | <a href="#">P03726</a> | 8 | Unknown |
| YP_002402202.1 | + | + | + | + | + | + | + | + | 3.A.18.1.1 | e-05   | <a href="#">P38919</a> | 8 | Unknown |
| YP_002401157.1 | + | + | + | + | + | + | + | + | 3.A.18.1.1 | e-07   | <a href="#">P38919</a> | 8 | Unknown |
| YP_002401194.1 | + | - | - | - | + | - | - | - | 3.A.18.1.1 | e-07   | <a href="#">P38919</a> | 2 | Unknown |
| YP_002413874.1 | + | + | + | + | + | + | + | + | 3.A.20.1.1 | 0.0007 | <a href="#">O09012</a> | 8 | Unknown |
| YP_002413882.1 | + | + | + | + | + | + | + | + | 3.A.3.2.24 | e-05   | <a href="#">O66938</a> | 8 | Unknown |
| YP_001464198.1 | + | + | + | + | + | + | + | + | 3.A.3.2.29 | e-07   | <a href="#">D5C355</a> | 8 | Unknown |
| YP_001462754.1 | + | + | + | + | + | + | + | + | 3.A.5.8.1  | e-05   | <a href="#">P14906</a> | 8 | Unknown |
| YP_001464359.1 | + | + | + | + | + | + | + | + | 3.A.5.8.1  | e-06   | <a href="#">P14906</a> | 8 | Unknown |
| YP_002405004.1 | + | + | + | + | + | + | + | + | 3.A.5.8.1  | e-06   | <a href="#">P14906</a> | 8 | Unknown |
| YP_002413009.1 | - | - | - | - | - | + | + | - | 3.A.6.1.1  | e-05   | <a href="#">Q93KS8</a> | 2 | Unknown |
| YP_002328231.1 | - | - | - | - | - | + | - | - | 3.A.6.1.1  | e-07   | <a href="#">Q9ZA78</a> | 1 | Unknown |
| YP_002330051.1 | - | - | - | - | + | - | - | - | 3.A.6.1.1  | e-07   | <a href="#">Q9ZA78</a> | 1 | Unknown |

1  
2  
3  
4  
5  
6  
7  
8  
9  
10  
11  
12  
13  
14  
15  
16  
17  
18  
19  
20  
21  
22  
23  
24  
25  
26  
27  
28  
29  
30  
31  
32  
33  
34  
35  
36  
37  
38  
39  
40  
41  
42  
43  
44  
45  
46  
47  
48  
49

|                |   |   |   |   |   |   |   |   |            |      |                        |   |         |
|----------------|---|---|---|---|---|---|---|---|------------|------|------------------------|---|---------|
| YP_002273860.1 | - | - | - | - | - | + | - | - | 3.A.6.2.1  | e-06 | <a href="#">P0A1L5</a> | 1 | Unknown |
| YP_002401248.1 | - | - | - | - | + | - | - | - | 3.A.7.1.1  | e-05 | <a href="#">P13464</a> | 1 | Unknown |
| YP_002401317.1 | - | - | - | - | + | - | - | - | 3.A.7.11.1 | e-05 | <a href="#">Q5EPC7</a> | 1 | Unknown |
| YP_002404526.1 | + | + | + | + | + | + | + | + | 3.A.7.13.2 | e-05 | <a href="#">E9RJ10</a> | 8 | Unknown |
| YP_006105187.1 | - | - | - | - | - | + | - | - | 3.A.7.3.1  | e-07 | <a href="#">Q91UX1</a> | 1 | Unknown |
| YP_002403846.1 | - | - | - | - | - | - | + | - | 3.A.7.9.1  | e-05 | <a href="#">Q5ZYC1</a> | 1 | Unknown |
| YP_002405230.1 | + | + | + | - | + | + | + | + | 3.B.1.1.3  | e-07 | <a href="#">Q9ZAA7</a> | 7 | Unknown |
| YP_002402194.1 | + | + | + | + | + | + | + | + | 3.B.1.1.5  | e-05 | <a href="#">Q9V0A4</a> | 8 | Unknown |
| YP_002401432.1 | + | + | + | + | + | + | + | + | 3.D.1.6.3  | e-05 | <a href="#">Q9SK66</a> | 8 | Unknown |
| YP_002403425.1 | - | + | - | + | - | + | - | - | 3.D.1.6.3  | e-06 | <a href="#">Q80800</a> | 3 | Unknown |
| YP_002401642.1 | + | - | - | + | + | + | + | + | 3.D.1.6.3  | e-07 | <a href="#">Q80800</a> | 6 | Unknown |
| YP_002403484.1 | - | - | - | - | - | - | + | - | 3.D.1.9.1  | e-06 | <a href="#">P23481</a> | 1 | Unknown |
| YP_002404584.1 | + | + | + | + | + | + | + | + | 3.D.5.1.1  | e-06 | <a href="#">Q56584</a> | 8 | Unknown |
| YP_002413653.1 | + | + | + | + | + | + | + | + | 3.D.5.1.1  | e-06 | <a href="#">Q56584</a> | 8 | Unknown |
| YP_002405784.1 | + | - | - | - | - | - | - | - | 3.D.6.1.1  | e-05 | <a href="#">Q07394</a> | 1 | Unknown |
| NP_754326.1    | + | + | + | + | + | + | + | + | 3.D.7.1.1  | e-07 | <a href="#">P96797</a> | 8 | Unknown |
| YP_002403323.1 | + | - | - | - | - | - | + | - | 3.D.8.1.1  | e-05 | <a href="#">Q59574</a> | 2 | Unknown |
| YP_002271280.1 | + | + | + | + | + | + | - | + | 3.D.8.1.1  | e-06 | <a href="#">Q27599</a> | 7 | Unknown |
| YP_006105183.1 | + | + | + | + | + | + | + | + | 3.D.8.1.2  | e-07 | <a href="#">Q48941</a> | 8 | Unknown |
| YP_002403349.1 | + | + | + | + | + | + | + | + | 3.D.8.1.2  | e-07 | <a href="#">Q48943</a> | 8 | Unknown |
| NP_754451.1    | - | - | - | - | - | + | - | - | 4.A.4.1.1  | e-07 | <a href="#">P05706</a> | 1 | Unknown |
| YP_006107346.1 | + | + | - | + | - | - | - | - | 4.A.7.1.1  | e-05 | <a href="#">P69822</a> | 3 | Unknown |
| YP_002271990.1 | - | - | - | + | - | - | - | - | 4.C.1.1.4  | e-05 | <a href="#">P69451</a> | 1 | Unknown |
| YP_006105705.1 | + | - | - | - | - | - | - | - | 4.D.1.1.2  | e-05 | <a href="#">Q54066</a> | 1 | Unknown |
| YP_006107221.1 | - | - | - | - | - | - | + | - | 4.D.1.1.2  | e-05 | <a href="#">Q54066</a> | 1 | Unknown |
| YP_001463948.1 | - | + | - | + | - | + | + | - | 4.D.1.1.3  | e-05 | <a href="#">P75905</a> | 4 | Unknown |
| YP_002402356.1 | + | + | + | + | + | + | + | + | 4.D.1.1.3  | e-07 | <a href="#">P75905</a> | 8 | Unknown |
| YP_002329079.1 | - | - | - | + | - | - | - | - | 4.D.1.1.3  | e-07 | <a href="#">P75905</a> | 1 | Unknown |
| YP_006107887.1 | - | + | - | - | - | - | - | - | 4.D.1.1.3  | e-07 | <a href="#">P75905</a> | 1 | Unknown |
| YP_002404955.1 | - | - | - | - | - | - | + | - | 5.A.3.3.1  | e-06 | <a href="#">P76173</a> | 1 | Unknown |

1  
2  
3  
4  
5  
6  
7  
8  
9  
10  
11  
12  
13  
14  
15  
16  
17  
18  
19  
20  
21  
22  
23  
24  
25  
26  
27  
28  
29  
30  
31  
32  
33  
34  
35  
36  
37  
38  
39  
40  
41  
42  
43  
44  
45  
46  
47  
48  
49

|                |   |   |   |   |   |   |   |   |             |        |                        |   |         |
|----------------|---|---|---|---|---|---|---|---|-------------|--------|------------------------|---|---------|
| YP_002402552.1 | - | + | + | + | - | - | - | - | 8.A.1.1.3   | e-07   | <a href="#">B1LPP9</a> | 3 | Unknown |
| YP_006105676.1 | - | + | + | + | - | + | - | - | 8.A.21.2.1  | e-07   | <a href="#">Q59180</a> | 4 | Unknown |
| YP_002404392.1 | - | - | - | - | + | - | - | - | 8.A.28.1.1  | e-05   | <a href="#">Q01484</a> | 1 | Unknown |
| YP_002401256.1 | + | + | + | + | + | + | + | + | 8.A.3.2.2   | 0.0052 | <a href="#">Q93NW3</a> | 8 | Unknown |
| YP_002404095.1 | - | + | + | + | - | + | + | - | 8.A.8.1.1   | e-05   | <a href="#">P0AA04</a> | 5 | Unknown |
| YP_002401568.1 | + | + | + | + | + | + | + | + | 8.A.9.1.1   | e-07   | <a href="#">Q05839</a> | 8 | Unknown |
| YP_002401569.1 | + | - | - | - | + | - | - | + | 8.A.9.1.2   | e-07   | <a href="#">Q07837</a> | 3 | Unknown |
| YP_002404287.1 | - | + | + | + | - | - | - | - | 8.A.9.1.2   | e-07   | <a href="#">Q07837</a> | 3 | Unknown |
| YP_002404291.1 | + | + | + | + | + | + | + | + | 9.A.10.1.1  | 0.0002 | <a href="#">P38993</a> | 8 | Unknown |
| YP_854268.1    | + | + | + | + | + | + | + | + | 9.A.10.1.1  | e-06   | <a href="#">P38993</a> | 8 | Unknown |
| YP_002404282.1 | + | + | - | + | + | + | + | + | 9.A.10.2.3  | e-05   | <a href="#">P31545</a> | 7 | Unknown |
| YP_851425.1    | + | + | + | + | + | + | + | + | 9.A.30.1.3  | e-06   | <a href="#">B5UIP4</a> | 8 | Unknown |
| YP_002404542.1 | + | + | + | + | + | + | + | + | 9.A.34.1.1  | e-05   | <a href="#">Q9KN49</a> | 8 | Unknown |
| YP_002403861.1 | + | + | + | + | + | + | - | + | 9.A.34.1.1  | e-05   | <a href="#">Q9KN49</a> | 7 | Unknown |
| YP_002402384.1 | + | - | - | - | - | - | - | - | 9.A.34.1.1  | e-05   | <a href="#">Q9KN52</a> | 1 | Unknown |
| YP_002404758.1 | + | - | - | - | - | - | - | - | 9.A.34.1.1  | e-05   | <a href="#">Q9KN46</a> | 1 | Unknown |
| YP_002405096.1 | - | - | + | + | - | - | - | - | 9.A.34.1.1  | e-06   | <a href="#">Q9KN48</a> | 2 | Unknown |
| YP_002403754.1 | + | - | - | - | - | - | - | - | 9.A.34.1.1  | e-06   | <a href="#">Q9KN44</a> | 1 | Unknown |
| YP_002405589.1 | - | - | + | - | - | + | - | - | 9.A.34.2.1  | e-06   | <a href="#">Q6EE17</a> | 2 | Unknown |
| YP_002401959.1 | + | + | + | + | + | + | + | + | 9.A.8.1.1   | 0.7176 | <a href="#">P33650</a> | 8 | Unknown |
| YP_002402551.1 | + | + | + | + | + | + | + | + | 9.A.8.1.1   | e-07   | <a href="#">P33650</a> | 8 | Unknown |
| YP_006105921.1 | + | + | + | + | + | + | + | + | 9.A.8.1.3   | e-06   | <a href="#">P73182</a> | 8 | Unknown |
| YP_002405302.1 | + | + | - | + | + | + | + | + | 9.A.8.1.6   | e-06   | <a href="#">Q7MV19</a> | 7 | Unknown |
| YP_002403415.1 | + | + | + | + | + | + | + | + | 9.A.8.1.7   | e-05   | <a href="#">A9P5Q3</a> | 8 | Unknown |
| YP_858924.1    | + | + | + | - | + | + | + | + | 9.A.8.1.8   | e-05   | <a href="#">Q29993</a> | 7 | Unknown |
| YP_002412045.1 | + | + | + | + | + | + | + | + | 9.A.8.1.8   | e-06   | <a href="#">Q29993</a> | 8 | Unknown |
| YP_002402432.1 | + | + | + | + | + | + | + | + | 9.B.10.1.1  | e-05   | <a href="#">C0SP99</a> | 8 | Unknown |
| YP_002401581.1 | + | + | + | + | + | + | + | + | 9.B.102.4.1 | e-05   | <a href="#">A0LFK9</a> | 8 | Unknown |
| YP_002404595.1 | - | + | - | - | - | - | - | - | 9.B.11.1.1  | e-05   | <a href="#">P13332</a> | 1 | Unknown |
| YP_006106641.1 | + | + | + | + | + | + | + | + | 9.B.124.1.1 | e-06   | <a href="#">P64592</a> | 8 | Unknown |

1  
2  
3  
4  
5  
6  
7  
8  
9  
10  
11  
12  
13  
14  
15  
16  
17  
18  
19  
20  
21  
22  
23  
24  
25  
26  
27  
28  
29  
30  
31  
32  
33  
34  
35  
36  
37  
38  
39  
40  
41  
42  
43  
44  
45  
46  
47  
48  
49

|                |   |   |   |   |   |   |   |   |            |       |                        |   |                       |
|----------------|---|---|---|---|---|---|---|---|------------|-------|------------------------|---|-----------------------|
| YP_002402112.1 | + | + | + | + | + | + | + | + | 9.B.27.2.1 | e-06  | <a href="#">P0AA60</a> | 8 | Unknown               |
| YP_006104938.1 | - | - | + | - | - | - | - | - | 9.B.42.1.1 | e-06  | <a href="#">P45754</a> | 1 | Unknown               |
| YP_002401927.1 | - | - | - | - | - | + | - | - | 9.B.97.1.2 | e-05  | <a href="#">Q28622</a> | 1 | Unknown               |
| YP_002401926.1 | + | + | + | + | + | + | + | + | 1.A.1.13.1 | 0     | <a href="#">P31069</a> | 8 | cation                |
| YP_002404650.1 | + | + | + | + | + | + | + | + | 1.A.11.1.1 | 0     | <a href="#">P69681</a> | 8 | amine (ammonia)       |
| YP_002401594.1 | + | + | + | + | + | + | + | + | 1.A.12.3.1 | e-121 | <a href="#">P0ACA3</a> | 8 | anion                 |
| YP_002405578.1 | - | + | + | + | - | - | - | - | 1.A.13.2.3 | 0     | <a href="#">P76481</a> | 3 | anion                 |
| YP_002404184.1 | + | + | + | + | + | + | + | + | 1.A.14.2.1 | e-118 | <a href="#">P0AAC6</a> | 8 | Unknown               |
| YP_002401949.1 | - | + | + | + | - | - | - | - | 1.A.14.2.2 | e-09  | <a href="#">P0AAC4</a> | 3 | putative acetate      |
| YP_002402572.1 | + | - | - | - | - | - | - | - | 1.A.14.2.2 | e-10  | <a href="#">P0AAC4</a> | 1 | putative acetate      |
| YP_002401684.1 | + | + | + | + | + | + | + | + | 1.A.14.2.2 | e-118 | <a href="#">P0AAC4</a> | 8 | putative acetate      |
| YP_002403123.1 | + | + | + | + | + | + | + | + | 1.A.22.1.1 | e-60  | P0A742                 | 8 | nonselective          |
| YP_002403122.1 | + | + | + | + | + | + | + | + | 1.A.23.1.1 | 0     | <a href="#">P77338</a> | 8 | nonselective          |
| YP_002401382.1 | + | + | + | + | + | + | + | + | 1.A.23.1.3 | 0     | <a href="#">P39285</a> | 8 | nonselective          |
| YP_002411063.1 | + | + | + | + | + | + | + | + | 1.A.23.2.1 | e-129 | <a href="#">P0C0S1</a> | 8 | nonselective          |
| YP_002404382.1 | + | + | + | + | + | + | + | + | 1.A.23.3.2 | 0     | <a href="#">P75783</a> | 8 | putative nonselective |
| YP_002404381.1 | + | + | + | + | + | + | + | + | 1.A.23.4.3 | e-179 | <a href="#">P0AEB5</a> | 8 | putative nonselective |
| YP_002401828.1 | + | + | + | + | + | + | + | + | 1.A.23.4.5 | 0     | <a href="#">P0AAT4</a> | 8 | putative nonselective |
| YP_002401829.1 | + | + | + | + | + | + | + | + | 1.A.30.1.1 | e-163 | <a href="#">P09348</a> | 8 | M+ cation             |
| YP_002401156.1 | + | + | + | + | + | + | + | + | 1.A.30.1.1 | e-175 | <a href="#">P0AF06</a> | 8 | M+ cation             |
| YP_002405200.1 | + | + | + | + | + | + | + | - | 1.A.30.1.1 | e-26  | <a href="#">P0AF06</a> | 7 | M+ cation             |
| YP_002273337.1 | - | - | - | - | - | + | - | - | 1.A.30.1.1 | e-47  | <a href="#">P09348</a> | 1 | M+ cation             |
| YP_002405203.1 | + | + | + | + | + | + | + | + | 1.A.30.2.1 | e-133 | <a href="#">P0ABU7</a> | 8 | M+ cation             |
| YP_002402584.1 | + | + | + | + | + | + | + | + | 1.A.30.2.1 | e-77  | <a href="#">P0ABV2</a> | 8 | M+ cation             |
| YP_002403625.1 | + | + | + | + | + | + | + | + | 1.A.30.2.2 | e-126 | <a href="#">P0ABU9</a> | 8 | M+ cation             |
| YP_853458.1    | + | + | + | + | + | + | + | + | 1.A.30.2.2 | e-67  | <a href="#">P0ABV8</a> | 8 | M+ cation             |
| YP_006104496.1 | + | + | + | + | + | + | + | + | 1.A.35.1.1 | e-175 | <a href="#">P0ABI4</a> | 8 | M2+ cation            |
| YP_002271841.1 | + | + | + | + | + | + | + | + | 1.A.35.4.1 | e-165 | <a href="#">Q9EYX5</a> | 8 | M2+ cation            |
| YP_006104497.1 | - | + | - | - | - | - | - | - | 1.A.45.1.1 | e-43  | <a href="#">Q01146</a> | 1 | M2+ cation            |
| YP_002271840.1 | - | + | - | - | - | - | - | - | 1.A.45.1.1 | e-36  | <a href="#">Q01074</a> | 1 | M2+ cation            |

1  
2  
3  
4  
5  
6  
7  
8  
9  
10  
11  
12  
13  
14  
15  
16  
17  
18  
19  
20  
21  
22  
23  
24  
25  
26  
27  
28  
29  
30  
31  
32  
33  
34  
35  
36  
37  
38  
39  
40  
41  
42  
43  
44  
45  
46  
47  
48  
49

|    |                |   |   |   |   |   |   |   |                   |       |                        |   |                            |
|----|----------------|---|---|---|---|---|---|---|-------------------|-------|------------------------|---|----------------------------|
| 4  | YP_853457.1    | - | + | - | - | - | - | - | 1.A.45.1.1        | e-36  | <a href="#">Q01076</a> | 1 | DNA                        |
| 5  | YP_853459.1    | - | - | - | - | - | - | + | 1.A.45.1.1        | e-49  | <a href="#">Q01076</a> | 1 | DNA                        |
| 6  | YP_002403626.1 | + | - | - | - | - | - | - | 1.A.45.1.1        | e-106 | <a href="#">Q01076</a> | 1 | DNA                        |
| 7  | YP_002402725.1 | - | - | + | - | - | - | - | 1.A.45.1.1        | e-143 | <a href="#">Q01076</a> | 1 | DNA                        |
| 8  | YP_002405034.1 | - | - | - | - | - | - | + | 1.A.45.1.1        | e-39  | <a href="#">Q01074</a> | 1 | DNA                        |
| 9  | YP_002401290.1 | - | - | + | - | - | - | - | 1.A.45.1.1        | e-59  | <a href="#">Q01146</a> | 1 | DNA                        |
| 10 | YP_002402621.1 | - | - | + | - | - | - | - | 1.A.45.1.1        | e-60  | <a href="#">Q01074</a> | 1 | DNA                        |
| 11 | YP_002405308.1 | + | - | - | - | - | - | - | 1.A.45.1.1        | e-60  | <a href="#">Q01074</a> | 1 | DNA                        |
| 12 | YP_001463339.1 | + | + | + | + | + | + | + | <b>1.A.46.3.4</b> | e-173 | <a href="#">B2NOW4</a> | 8 | DNA                        |
| 13 | YP_002402016.1 | + | + | + | + | + | + | + | <b>1.A.62.2.1</b> | e-21  | <a href="#">A0M015</a> | 8 | DNA                        |
| 14 | YP_002402071.1 | + | + | + | + | + | + | + | <b>1.A.62.2.1</b> | e-24  | <a href="#">A0M015</a> | 8 | Anions                     |
| 15 | YP_002328485.1 | + | + | + | + | + | + | + | <b>1.A.8.1.1</b>  | e-150 | <a href="#">POAERO</a> | 8 | unknown                    |
| 16 | YP_002401391.1 | - | - | - | - | + | + | - | <b>1.A.8.1.1</b>  | e-97  | POAERO                 | 2 | unknown                    |
| 17 | YP_853015.1    | + | + | + | + | + | + | + | <b>1.A.8.3.1</b>  | e-100 | <a href="#">P60844</a> | 8 | water                      |
| 18 | YP_002403495.1 | + | + | + | + | + | + | + | <b>1.B.1.1.1</b>  | 0     | <a href="#">P02931</a> | 8 | polyols                    |
| 19 | YP_002329865.1 | + | + | + | + | + | + | + | <b>1.B.1.1.2</b>  | 0     | <a href="#">P02932</a> | 8 | water                      |
| 20 | YP_002412976.1 | - | - | + | - | - | - | - | <b>1.B.1.1.2</b>  | e-96  | <a href="#">P02932</a> | 1 | nonselective               |
| 21 | YP_002402589.1 | + | - | + | - | + | + | + | <b>1.B.1.1.3</b>  | 0     | <a href="#">P06996</a> | 6 | nonselective               |
| 22 | YP_006106282.1 | - | - | - | - | - | + | - | <b>1.B.1.1.3</b>  | e-116 | <a href="#">P06996</a> | 1 | anion selective            |
| 23 | YP_006105475.1 | + | + | + | + | + | + | - | <b>1.B.1.1.3</b>  | e-130 | <a href="#">P06996</a> | 7 | nonselective               |
| 24 | YP_002401880.1 | + | - | - | - | + | + | + | 1.B.1.1.3         | e-29  | P06996                 | 4 | nonselective               |
| 25 | YP_001463266.1 | - | + | - | + | - | - | - | <b>1.B.1.1.4</b>  | e-101 | <a href="#">P21420</a> | 2 | nonselective               |
| 26 | YP_002403908.1 | - | + | + | + | - | + | - | <b>1.B.1.1.5</b>  | 0     | <a href="#">P07238</a> | 4 | nonselective               |
| 27 |                | + | + | + | + | + | - | - | <b>1.B.1.1.5</b>  | 0     | <a href="#">P07238</a> | 4 | nonselective               |
| 28 |                | - | - | - | - | + | - | - | <b>1.B.1.1.5</b>  | e-98  | <a href="#">P07238</a> | 1 | nonselective               |
| 29 |                | + | + | - | + | + | + | + | <b>1.B.1.2.1</b>  | e-12  | <a href="#">P97056</a> | 7 | nonselective               |
| 30 | YP_006108391.1 | - | + | + | + | - | - | - | <b>1.B.10.1.1</b> | e-105 | <a href="#">P0A927</a> | 3 | nucleoside                 |
| 31 | YP_002401539.1 | + | + | + | + | + | + | + | <b>1.B.10.1.1</b> | e-176 | <a href="#">P0A927</a> | 8 | nucleoside                 |
| 32 |                |   |   |   |   |   |   |   | <b>1.B.11.2.1</b> |       |                        |   | protein usher (PapC pores) |
| 33 | YP_002271749.1 | - | - | - | - | - | - | + | <b>1.B.11.2.1</b> | 0     | <a href="#">P07110</a> | 1 |                            |

1  
2  
3  
4  
5  
6  
7  
8  
9  
10  
11  
12  
13  
14  
15  
16  
17  
18  
19  
20  
21  
22  
23  
24  
25  
26  
27  
28  
29  
30  
31  
32  
33  
34  
35  
36  
37  
38  
39  
40  
41  
42  
43  
44  
45  
46  
47  
48  
49

|                |   |   |   |   |   |   |   |   |            |       |                        |   |                            |
|----------------|---|---|---|---|---|---|---|---|------------|-------|------------------------|---|----------------------------|
| YP_006108762.1 | - | + | + | + | - | + | - | - | 1.B.11.2.1 | 0     | <a href="#">P07110</a> | 4 | protein usher (PapC pores) |
| YP_002329981.1 | - | - | - | - | - | + | - | - | 1.B.11.2.1 | 0     | <a href="#">P07110</a> | 1 | protein usher (PapC pores) |
| YP_002403604.1 | + | - | - | - | + | - | - | - | 1.B.11.2.1 | 0     | <a href="#">P07110</a> | 2 | protein usher (PapC pores) |
| NP_755465.1    | - | - | - | + | - | - | - | - | 1.B.11.2.1 | 0     | <a href="#">P07110</a> | 1 | protein usher (PapC pores) |
| YP_006106705.1 | - | + | + | + | - | - | - | - | 1.B.11.2.1 | e-171 | <a href="#">P07110</a> | 3 | protein usher (PapC pores) |
| YP_002401808.1 | + | - | - | - | + | + | - | + | 1.B.11.2.2 | 0     | <a href="#">P75750</a> | 4 | protein usher (PapC pores) |
| YP_002269340.1 | - | - | - | - | - | - | + | - | 1.B.11.2.2 | 0     | <a href="#">P75750</a> | 1 | unknown                    |
| YP_002404417.1 | + | - | - | - | + | - | - | - | 1.B.11.2.2 | 0     | <a href="#">P75750</a> | 2 | unknown                    |
| YP_006107455.1 | - | + | + | + | - | - | - | - | 1.B.11.2.2 | 0     | <a href="#">P75750</a> | 3 | unknown                    |
| YP_002403394.1 | + | + | + | + | + | + | - | + | 1.B.11.3.2 | e-119 | <a href="#">P21647</a> | 7 | fimbrial protein usher     |
| YP_002271391.1 | - | - | - | - | - | - | + | - | 1.B.11.3.2 | e-122 | <a href="#">P21647</a> | 1 | fimbrial protein usher     |
| YP_002401272.1 | + | - | - | - | + | - | - | + | 1.B.11.3.3 | 0     | <a href="#">P33129</a> | 3 | fimbrial protein usher     |
| YP_002268748.1 | - | - | - | - | - | - | + | - | 1.B.11.3.3 | 0     | <a href="#">P33129</a> | 1 | fimbrial protein usher     |
| YP_002410914.1 | - | - | - | - | - | + | - | - | 1.B.11.3.3 | 0     | <a href="#">P33129</a> | 1 | fimbrial protein usher     |
| YP_006104298.1 | - | + | + | + | - | - | - | - | 1.B.11.3.3 | 0     | <a href="#">P33129</a> | 3 | fimbrial protein usher     |
| YP_002410798.1 | - | - | - | - | - | + | - | - | 1.B.11.3.3 | e-115 | <a href="#">P33129</a> | 1 | fimbrial protein usher     |
| YP_006108775.1 | - | + | - | - | - | - | - | - | 1.B.11.3.3 | e-133 | <a href="#">P33129</a> | 1 | fimbrial protein usher     |
| YP_002414540.1 | - | - | - | - | - | + | - | - | 1.B.11.3.5 | 0     | <a href="#">Q8CVM4</a> | 1 | fimbrial protein usher     |
| YP_006107825.1 | - | + | + | + | - | - | - | - | 1.B.11.3.5 | 0     | <a href="#">Q8CVM4</a> | 3 | fimbrial protein usher     |
| YP_002404518.1 | + | - | - | - | + | - | + | + | 1.B.11.3.6 | 0     | <a href="#">P42915</a> | 4 | fimbrial protein usher     |
| YP_006108861.1 | - | + | + | + | + | + | + | + | 1.B.11.3.9 | 0     | <a href="#">P30130</a> | 7 | fimbrial protein usher     |
| YP_006108861.1 | + | - | - | - | - | + | + | + | 1.B.11.3.9 | 0     | <a href="#">P30130</a> | 4 | fimbrial protein usher     |
| YP_002402082.1 | + | - | - | - | + | - | - | + | 1.B.11.3.9 | 0     | <a href="#">P30130</a> | 3 | fimbrial protein usher     |
| YP_002402709.1 | + | + | + | + | - | + | + | - | 1.B.11.3.9 | 0     | <a href="#">P30130</a> | 6 | fimbrial protein usher     |



1  
2  
3  
4  
5  
6  
7  
8  
9  
10  
11  
12  
13  
14  
15  
16  
17  
18  
19  
20  
21  
22  
23  
24  
25  
26  
27  
28  
29  
30  
31  
32  
33  
34  
35  
36  
37  
38  
39  
40  
41  
42  
43  
44  
45  
46  
47  
48  
49

|                |   |   |   |   |   |   |   |   |                 |       |                        |   |                          |
|----------------|---|---|---|---|---|---|---|---|-----------------|-------|------------------------|---|--------------------------|
| YP_002404928.1 | + | - | - | - | - | - | - | - | 1.B.11.3.9      | 0     | <a href="#">P30130</a> | 1 | fimbrial protein usher   |
| YP_006105297.1 | - | + | - | + | - | - | - | - | 1.B.11.3.9      | e-146 | <a href="#">P30130</a> | 2 | fimbrial protein usher   |
| YP_002273255.1 | - | - | - | - | - | - | + | - | 1.B.11.3.9      | e-164 | <a href="#">P30130</a> | 1 | fimbrial protein usher   |
| YP_006105227.1 | - | + | - | - | - | - | - | - | 1.B.11.3.9      | e-167 | <a href="#">P30130</a> | 1 | fimbrial protein usher   |
| YP_002405119.1 | + | - | - | - | + | + | - | - | 1.B.11.3.9      | e-173 | <a href="#">P30130</a> | 3 | fimbrial protein usher   |
| YP_002401420.1 | + | + | + | + | + | + | + | + | 1.B.11.4.1      | e-12  | <a href="#">P25733</a> | 8 | fimbrial protein usher   |
| YP_002404466.1 | + | - | - | - | + | - | - | - | 1.B.11.4.1      | e-83  | <a href="#">P25733</a> | 2 | fimbrial protein usher   |
| YP_002271639.1 | - | - | - | - | - | - | + | + | 1.B.12.1.1      | e-50  | <a href="#">Q03155</a> | 2 | protein adhesins         |
| YP_002403506.1 | + | - | - | - | + | - | - | + | 1.B.12.1.1      | e-50  | <a href="#">Q03155</a> | 3 | protein adhesins         |
| YP_002413282.1 | - | - | - | - | - | + | - | - | 1.B.12.1.1      | e-52  | <a href="#">Q03155</a> | 1 | protein adhesins         |
| YP_006106605.1 | - | + | + | + | - | - | - | - | 1.B.12.1.1      | e-58  | <a href="#">Q03155</a> | 3 | protein adhesins         |
| YP_006106715.1 | - | + | - | + | - | - | - | - | 1.B.12.1.2      | e-103 | <a href="#">Q7BCK4</a> | 2 | protein virulence factor |
| YP_002401441.1 | + | - | - | - | + | - | + | - | 1.B.12.1.2      | e-115 | <a href="#">Q7BCK4</a> | 3 | protein virulence factor |
| YP_002402351.1 | + | + | - | + | + | - | - | - | 1.B.12.1.2      | e-95  | <a href="#">Q7BCK4</a> | 4 | protein virulence factor |
| YP_002402715.1 | + | - | - | - | - | + | + | - | 1.B.12.1.3      | e-105 | <a href="#">Q9Z625</a> | 3 | protein virulence factor |
| YP_001462797.1 | - | - | - | - | + | - | - | - | 1.B.12.1.3      | e-105 | <a href="#">Q9Z625</a> | 1 | protein virulence factor |
| YP_852298.1    | - | - | + | - | - | + | - | - | 1.B.12.1.3      | e-27  | <a href="#">Q9Z625</a> | 2 | protein virulence factor |
| NP_754776.1    | - | - | - | + | - | - | - | - | 1.B.12.1.3      | e-85  | <a href="#">Q9Z625</a> | 1 | protein virulence factor |
| YP_002402383.1 | + | - | - | - | + | + | - | + | 1.B.12.2.1      | e-38  | <a href="#">P14283</a> | 4 | protein virulence factor |
| YP_001461547.1 | - | - | - | - | + | + | - | - | 1.B.12.2.2      | e-24  | <a href="#">Q45343</a> | 2 | protein virulence factor |
| YP_006104584.1 | - | + | + | + | - | - | - | - | 1.B.12.2.2      | e-24  | <a href="#">Q45343</a> | 3 | protein virulence factor |
| YP_002401499.1 | + | - | - | - | - | - | - | - | 1.B.12.2.2      | e-24  | <a href="#">Q45343</a> | 1 | protein virulence factor |
| YP_853299.1    | - | - | + | - | - | - | - | - | 1.B.12.2.3      | e-09  | <a href="#">Q45340</a> | 1 | protein virulence factor |
| YP_006107283.1 | - | + | - | + | - | + | - | - | 1.B.12.4 family |       |                        | 3 | protein virulence factor |
| YP_006104502.1 | - | + | + | + | - | - | - | - | 1.B.12.4 family |       |                        | 3 | protein virulence factor |
| YP_002404249.1 | + | + | - | + | - | - | - | - | 1.B.12.4 family |       |                        | 3 | protein virulence factor |
| YP_002405532.1 | + | - | - | - | - | - | - | - | 1.B.12.4 family |       |                        | 1 | protein virulence factor |



1  
2  
3  
4  
5  
6  
7  
8  
9  
10  
11  
12  
13  
14  
15  
16  
17  
18  
19  
20  
21  
22  
23  
24  
25  
26  
27  
28  
29  
30  
31  
32  
33  
34  
35  
36  
37  
38  
39  
40  
41  
42  
43  
44  
45  
46  
47  
48  
49

|                |   |   |   |   |   |   |   |   |                   |       |                        |   |                             |
|----------------|---|---|---|---|---|---|---|---|-------------------|-------|------------------------|---|-----------------------------|
| YP_002401946.1 | + | + | + | + | + | + | + | + | <b>1.B.14.1.9</b> | 0     | <a href="#">P75780</a> | 8 | siderophore                 |
| YP_006107909.1 | - | + | + | + | - | + | + | - | <b>1.B.14.2.2</b> | 0     | <a href="#">P31499</a> | 5 | siderophore                 |
| YP_006105316.1 | - | + | - | + | - | - | - | - | <b>1.B.14.2.2</b> | e-144 | <a href="#">P31499</a> | 2 | siderophore (heme)          |
| YP_002405349.1 | + | + | + | + | + | + | + | + | <b>1.B.14.3.1</b> | 0     | <a href="#">P06129</a> | 8 | enzyme cofactor (cobalamin) |
| YP_006105552.1 | - | + | + | + | - | + | - | - | <b>1.B.14.4.1</b> | e-13  | <a href="#">P72121</a> | 4 | cation (Cu 2+)              |
| YP_002403258.1 | + | + | + | + | - | + | - | - | <b>1.B.14.7.2</b> | 0     | <a href="#">P0C2M9</a> | 5 | protein (pesticin)          |
| YP_002402660.1 | + | + | + | - | + | + | + | + | <b>1.B.14.7.2</b> | e-26  | <a href="#">P0C2M9</a> | 7 | protein (pesticin)          |
| YP_002405516.1 | + | - | - | + | - | + | - | - | <b>1.B.14.9.3</b> | 0     | <a href="#">Q7CGN6</a> | 3 | siderophore                 |
| YP_006107282.1 | - | + | - | - | - | - | - | - | <b>1.B.14.9.3</b> | 0     | <a href="#">Q7CGN6</a> | 1 | siderophore                 |
| YP_001464382.1 | - | - | - | - | + | - | - | - | <b>1.B.15.1.1</b> | 0     | <a href="#">P77076</a> | 1 | sugar                       |
| YP_006108347.1 | - | + | - | - | - | - | - | - | <b>1.B.15.1.1</b> | e-84  | <a href="#">P77076</a> | 1 | sugar                       |
| YP_006108348.1 | - | + | + | + | - | + | + | - | <b>1.B.15.1.1</b> | e-97  | <a href="#">P77076</a> | 5 | sugar                       |
| YP_002404408.1 | + | + | + | + | + | + | + | + | <b>1.B.17.1.1</b> | 0     | <a href="#">P02930</a> | 8 | nonselective                |
| YP_002411289.1 | - | - | - | - | - | + | + | - | <b>1.B.17.1.4</b> | e-19  | <a href="#">Q92Q38</a> | 2 | nonselective                |
| YP_002404851.1 | + | - | - | - | - | - | - | - | <b>1.B.17.3.4</b> | 0     | <a href="#">Q9ZHD2</a> | 1 | cation                      |
| YP_002401679.1 | + | + | + | + | + | + | + | + | <b>1.B.17.3.5</b> | 0     | <a href="#">P77211</a> | 8 | cation                      |
| YP_002405456.1 | + | + | + | + | + | + | + | + | <b>1.B.17.3.9</b> | 0     | <a href="#">P32714</a> | 8 | multidrug                   |
| YP_002403417.1 | + | + | + | + | + | + | + | - | <b>1.B.17.3.9</b> | e-62  | <a href="#">P32714</a> | 7 | multidrug                   |
| YP_006107341.1 | - | + | + | + | - | + | - | - | <b>1.B.18.1.2</b> | 0     | <a href="#">Q03961</a> | 4 | polysaccharide              |
| YP_002403352.1 | + | + | + | + | + | + | + | + | <b>1.B.18.3.1</b> | 0     | <a href="#">P0A930</a> | 8 | colanic exopolysaccharide   |
| YP_002402183.1 | + | - | - | - | + | - | + | + | <b>1.B.18.3.1</b> | e-145 | <a href="#">P0A930</a> | 4 | colanic exopolysaccharide   |
| NP_754476.1    | - | - | - | + | - | - | - | + | <b>1.B.18.3.1</b> | e-92  | <a href="#">P0A930</a> | 2 | colanic exopolysaccharide   |
| YP_006104440.1 | - | + | - | - | - | - | - | - | <b>1.B.20.1.3</b> | 0     | <a href="#">Q3YL97</a> | 1 | protein TPS                 |
| YP_002269854.1 | - | - | - | - | - | - | + | - | <b>1.B.20.1.3</b> | e-12  | <a href="#">Q3YL97</a> | 1 | protein TPS                 |
| YP_002269765.1 | - | - | - | - | - | - | + | - | <b>1.B.20.1.4</b> | 0     | <a href="#">Q8XAN8</a> | 1 | protein TPS                 |
| YP_002402561.1 | + | + | + | + | + | - | + | + | <b>1.B.21.1.1</b> | 0     | <a href="#">P76045</a> | 7 | nonselective porin          |
| YP_002273391.1 | - | - | - | - | - | - | + | - | <b>1.B.21.2.1</b> | e-123 | <a href="#">P76773</a> | 1 | polyol porin                |
| YP_001465359.1 | - | - | - | - | + | + | - | + | <b>1.B.21.2.1</b> | e-131 | <a href="#">P76773</a> | 3 | polyol porin                |

1  
2  
3

|    |                |   |   |   |   |   |   |   |   |             |       |                        |   |                         |
|----|----------------|---|---|---|---|---|---|---|---|-------------|-------|------------------------|---|-------------------------|
| 4  | YP_006107718.1 | - | + | + | + | - | - | - | + | 1.B.22.1.1  | 0     | <a href="#">P15644</a> | 4 | protein                 |
| 5  | YP_002404340.1 | + | + | + | - | + | + | - | - | 1.B.22.1.1  | e-147 | <a href="#">P15644</a> | 5 | protein                 |
| 6  | YP_002413888.1 | - | - | - | - | - | + | + | - | 1.B.22.3.2  | e-151 | <a href="#">P35672</a> | 2 | protein (invasin)       |
| 7  | YP_002331417.1 | - | - | - | - | - | - | + | - | 1.B.22.3.3  | e-72  | <a href="#">Q01244</a> | 1 | protein                 |
| 8  | YP_002404738.1 | + | + | + | + | + | + | + | + | 1.B.22.4.2  | 0     | <a href="#">Q1R5P6</a> | 8 | DNA                     |
| 9  | YP_001462784.1 | - | - | - | - | + | - | - | - | 1.B.22.5.1  | e-13  | <a href="#">P03666</a> | 1 | Protein                 |
| 10 | YP_002401776.1 | + | + | + | + | + | + | - | + | 1.B.25.1.13 | 0     | <a href="#">P75733</a> | 7 | chitosugar              |
| 11 | YP_002402844.1 | + | + | + | + | + | + | - | + | 1.B.25.1.5  | 0     | <a href="#">Q47706</a> | 7 | chitosugar              |
| 12 | YP_002405410.1 | + | + | + | + | + | + | + | + | 1.B.3.1.1   | 0     | <a href="#">P02943</a> | 8 | sugar                   |
| 13 | YP_002405110.1 | + | + | + | + | + | - | - | + | 1.B.3.1.3   | 0     | <a href="#">P26218</a> | 6 | sugar derivative        |
| 14 | YP_002402738.1 | + | + | + | + | + | - | - | - | 1.B.3.1.3   | e-161 | <a href="#">P26218</a> | 5 | sugar derivative        |
| 15 | YP_002405639.1 | + | + | + | + | + | + | + | + | 1.B.33.1.2  | e-10  | <a href="#">P46024</a> | 8 | protein (OMP)           |
| 16 | YP_002401309.1 | + | + | + | + | + | + | + | + | 1.B.33.1.3  | 0     | P0A943                 | 8 | protein (OMP)           |
| 17 | YP_002403806.1 | + | + | + | + | + | + | + | + | 1.B.33.1.3  | 0     | <a href="#">P77774</a> | 8 | protein (OMP)           |
| 18 | YP_002403887.1 | + | + | + | + | + | + | + | + | 1.B.33.1.3  | e-140 | <a href="#">P0AC02</a> | 8 | protein (OMP)           |
| 19 | YP_002403773.1 | + | + | + | + | + | + | + | + | 1.B.33.1.3  | e-160 | <a href="#">P0A903</a> | 8 | protein (OMP)           |
| 20 | YP_002403907.1 | + | + | + | + | + | + | + | + | 1.B.33.1.3  | e-53  | <a href="#">P0A937</a> | 8 | protein (OMP)           |
| 21 | YP_006108860.1 | - | + | + | + | + | + | + | + | 1.B.35.2.1  | e-144 | <a href="#">P69856</a> | 8 | anion selective porin   |
| 22 | YP_006107305.1 | - | + | - | + | - | + | - | - | 1.B.35.2.1  | e-84  | <a href="#">P69856</a> | 3 | anion selective porin   |
| 23 | YP_002402438.1 | + | + | + | + | + | + | + | + | 1.B.39.1.1  | e-93  | <a href="#">Q8ZP50</a> | 8 | nonselective porin      |
| 24 | YP_002411290.1 | - | - | - | - | - | + | + | - | 1.B.40.1.2  | e-72  | <a href="#">Q13U92</a> | 2 | protein (hemagglutinin) |
| 25 | YP_002269145.1 | - | - | - | - | - | - | + | - | 1.B.40.1.3  | e-08  | <a href="#">Q7CHJ4</a> | 1 | protein (adhesin)       |
| 26 | YP_851662.1    | - | - | + | - | - | - | - | - | 1.B.40.1.5  | e-09  | <a href="#">B3FNS7</a> | 1 | protein (adhesin)       |
| 27 | YP_002411296.1 | - | - | - | - | - | + | - | - | 1.B.40.1.5  | e-15  | <a href="#">B3FNS7</a> | 1 | protein (adhesin)       |
| 28 | YP_002404993.1 | + | - | - | - | + | - | + | - | 1.B.40.2.3  | 0     | <a href="#">A8A667</a> | 3 | trimeric adhesin        |
| 29 | YP_006108010.1 | - | + | - | + | - | - | - | - | 1.B.40.2.3  | 0     | <a href="#">A8A667</a> | 2 | trimeric adhesin        |
| 30 | YP_859203.1    | - | - | + | - | - | - | - | - | 1.B.40.2.3  | 0     | <a href="#">A8A667</a> | 1 | trimeric adhesin        |
| 31 | YP_002401193.1 | + | + | + | + | + | + | + | + | 1.B.42.1.2  | 0     | <a href="#">P31554</a> | 8 | polysaccharide (LPS)    |
| 32 | YP_002405677.1 | + | + | + | + | + | + | + | + | 1.B.42.1.2  | 0     | <a href="#">P0ADC6</a> | 8 | polysaccharide (LPS)    |

45  
46  
47  
48  
49

1  
2  
3  
4  
5  
6  
7  
8  
9  
10  
11  
12  
13  
14  
15  
16  
17  
18  
19  
20  
21  
22  
23  
24  
25  
26  
27  
28  
29  
30  
31  
32  
33  
34  
35  
36  
37  
38  
39  
40  
41  
42  
43  
44  
45  
46  
47  
48  
49

|                |   |   |   |   |   |   |   |   |                   |       |                        |   |                           |
|----------------|---|---|---|---|---|---|---|---|-------------------|-------|------------------------|---|---------------------------|
| YP_002404571.1 | + | + | + | + | + | + | + | + | <b>1.B.42.1.2</b> | e-106 | <a href="#">P0ADW0</a> | 8 | polysaccharide (LPS)      |
| YP_002404573.1 | + | + | + | + | + | + | + | + | <b>1.B.42.1.2</b> | e-128 | <a href="#">P0A9V1</a> | 8 | polysaccharide (LPS)      |
| YP_854457.1    | - | - | + | - | - | - | - | - | <b>1.B.42.1.2</b> | e-35  | <a href="#">P0ADC6</a> | 1 | polysaccharide (LPS)      |
| YP_002404355.1 | + | + | - | + | + | - | - | - | <b>1.B.42.1.2</b> | e-36  | <a href="#">P0ADC6</a> | 4 | polysaccharide (LPS)      |
| YP_002401748.1 | + | + | + | + | + | + | + | + | <b>1.B.42.1.2</b> | e-84  | <a href="#">P0ADC1</a> | 8 | polysaccharide (LPS)      |
| YP_002404572.1 | + | + | + | + | + | + | + | + | <b>1.B.42.1.2</b> | e-94  | <a href="#">P0ADV1</a> | 8 | polysaccharide (LPS)      |
| YP_002402031.1 | + | + | + | + | + | + | + | + | <b>1.B.46.1.1</b> | e-104 | <a href="#">P61316</a> | 8 | protein (lipoprotein)     |
| YP_002402390.1 | + | + | + | + | + | + | + | + | <b>1.B.46.1.1</b> | e-113 | <a href="#">P61320</a> | 8 | protein (lipoprotein)     |
| YP_002402239.1 | + | + | + | + | + | + | + | + | <b>1.B.48.1.1</b> | e-151 | <a href="#">P0A204</a> | 8 | protein (amyloid fiber)   |
| YP_002273158.1 | - | - | - | - | - | - | + | - | <b>1.B.54.1.1</b> | 0     | <a href="#">P43261</a> | 1 | protein (intimin/invasin) |
| YP_001464361.1 | - | - | - | - | + | - | - | - | <b>1.B.54.1.2</b> | e-104 | <a href="#">P11922</a> | 1 | protein (intimin/invasin) |
| YP_002401426.1 | + | - | - | - | + | + | + | - | <b>1.B.54.1.2</b> | e-107 | <a href="#">P11922</a> | 4 | protein (intimin/invasin) |
| YP_006104524.1 | - | + | + | + | - | - | - | - | <b>1.B.54.1.2</b> | e-109 | <a href="#">P11922</a> | 3 | protein (intimin/invasin) |
| YP_006106304.1 | - | + | + | - | - | - | - | - | <b>1.B.54.1.2</b> | e-14  | <a href="#">P11922</a> | 2 | protein (intimin/invasin) |
| YP_002402403.1 | + | + | + | + | + | + | + | + | <b>1.B.54.1.2</b> | e-53  | <a href="#">P11922</a> | 8 | protein (intimin/invasin) |
| YP_853652.1    | - | - | + | - | - | - | - | - | <b>1.B.54.1.2</b> | e-67  | <a href="#">P11922</a> | 1 | protein (intimin/invasin) |
| YP_006106838.1 | - | + | - | + | - | + | - | - | <b>1.B.54.1.2</b> | e-71  | <a href="#">P11922</a> | 3 | protein (intimin/invasin) |
| YP_002413033.1 | - | - | - | - | - | + | + | - | <b>1.B.54.1.2</b> | e-88  | <a href="#">P11922</a> | 2 | protein (intimin/invasin) |
| YP_001463325.1 | - | - | - | - | + | - | - | + | <b>1.B.54.1.2</b> | e-89  | <a href="#">P11922</a> | 2 | protein (intimin/invasin) |
| YP_002414820.1 | - | - | - | - | - | + | - | - | <b>1.B.54.1.2</b> | e-96  | <a href="#">P11922</a> | 1 | protein (intimin/invasin) |
| YP_006104455.1 | - | + | - | + | - | - | - | - | <b>1.B.54.1.5</b> | e-16  | <a href="#">Q7W286</a> | 2 | putative intimin/invasin  |
| YP_002402227.1 | + | + | + | + | + | - | + | + | <b>1.B.55.1.1</b> | 0     | <a href="#">P69434</a> | 7 | putative intimin/invasin  |
| YP_002402099.1 | + | + | + | + | + | + | + | + | <b>1.B.6.1.1</b>  | 0     | <a href="#">P0A910</a> | 8 | anion selective porin     |
| YP_006107096.1 | - | + | + | + | - | - | - | - | <b>1.B.6.1.2</b>  | e-11  | <a href="#">P13794</a> | 3 | nonselective porin        |
| YP_002401832.1 | + | + | + | + | + | + | + | + | <b>1.B.6.1.2</b>  | e-12  | <a href="#">P13794</a> | 8 | nonselective porin        |
| YP_001464142.1 | - | - | - | - | + | - | - | - | <b>1.B.6.1.2</b>  | e-12  | <a href="#">P13794</a> | 1 | nonselective porin        |
| YP_002404302.1 | + | - | - | - | - | - | - | - | <b>1.B.6.1.2</b>  | e-13  | <a href="#">P13794</a> | 1 | nonselective porin        |
| YP_002404936.1 | + | + | + | + | + | + | + | + | <b>1.B.6.1.3</b>  | e-20  | <a href="#">P65593</a> | 8 | putative porin            |
| YP_002403896.1 | + | + | + | + | + | + | + | + | <b>1.B.6.1.4</b>  | e-15  | <a href="#">Q8KWW6</a> | 8 | nonselective porin        |
| YP_002402760.1 | + | - | + | - | + | + | + | - | <b>1.B.6.2.1</b>  | e-19  | <a href="#">P0A917</a> | 5 | nonselective porin        |

1  
2  
3  
4  
5  
6  
7  
8  
9  
10  
11  
12  
13  
14  
15  
16  
17  
18  
19  
20  
21  
22  
23  
24  
25  
26  
27  
28  
29  
30  
31  
32  
33  
34  
35  
36  
37  
38  
39  
40  
41  
42  
43  
44  
45  
46  
47  
48  
49

|                |   |   |   |   |   |   |   |   |            |       |                        |   |                         |
|----------------|---|---|---|---|---|---|---|---|------------|-------|------------------------|---|-------------------------|
| YP_002270304.1 | - | - | - | - | - | - | + | - | 1.B.6.2.1  | e-19  | P0A917                 | 1 | nonselective porin      |
| YP_002271473.1 | - | - | - | - | - | - | + | - | 1.B.6.2.1  | e-19  | P0A917                 | 1 | nonselective porin      |
| YP_002270238.1 | - | - | - | - | - | - | + | - | 1.B.6.2.1  | e-20  | <a href="#">P0A917</a> | 1 | nonselective porin      |
| YP_002401907.1 | + | - | - | - | - | - | + | - | 1.B.6.2.1  | e-20  | <a href="#">P0A917</a> | 2 | nonselective porin      |
| YP_002271095.1 | - | - | - | - | - | - | + | - | 1.B.6.2.1  | e-21  | <a href="#">P0A917</a> | 1 | nonselective porin      |
| YP_002271189.1 | - | - | - | - | - | - | + | - | 1.B.6.2.1  | e-21  | <a href="#">P0A917</a> | 1 | nonselective porin      |
| YP_002271413.1 | - | - | - | - | - | - | + | - | 1.B.6.2.1  | e-21  | <a href="#">P0A917</a> | 1 | nonselective porin      |
| YP_002273579.1 | - | - | - | - | - | - | + | - | 1.B.6.2.1  | e-21  | <a href="#">P0A917</a> | 1 | nonselective porin      |
| YP_002269436.1 | - | - | - | - | - | - | + | - | 1.B.6.2.1  | e-22  | <a href="#">P0A917</a> | 1 | nonselective porin      |
| YP_002328284.1 | - | - | - | - | - | - | + | - | 1.B.6.2.1  | e-22  | <a href="#">P0A917</a> | 1 | nonselective porin      |
| YP_002328598.1 | - | - | - | - | - | - | + | - | 1.B.6.2.1  | e-22  | <a href="#">P0A917</a> | 1 | nonselective porin      |
| YP_002402490.1 | + | - | + | - | - | + | - | - | 1.B.6.2.1  | e-22  | <a href="#">P0A917</a> | 3 | nonselective porin      |
| YP_002402169.1 | + | + | - | + | - | - | - | - | 1.B.6.2.1  | e-22  | <a href="#">P0A917</a> | 3 | nonselective porin      |
| YP_852551.1    | - | - | + | - | - | - | - | - | 1.B.6.2.1  | e-22  | <a href="#">P0A917</a> | 1 | nonselective porin      |
| NP_753376.1    | - | - | - | + | - | - | - | - | 1.B.6.2.1  | e-23  | <a href="#">P0A917</a> | 1 | nonselective porin      |
| YP_002401955.1 | + | + | + | + | + | + | + | + | 1.B.6.2.1  | e-88  | <a href="#">P0A917</a> | 8 | nonselective porin      |
| YP_002271766.1 | - | - | - | - | - | - | + | - | 1.B.6.2.2  | e-19  | <a href="#">Q0WCZ9</a> | 1 | unknown                 |
| YP_002330699.1 | - | - | - | - | - | - | + | - | 1.B.6.2.2  | e-24  | <a href="#">Q0WCZ9</a> | 1 | unknown                 |
| YP_002405688.1 | + | - | - | - | - | - | - | - | 1.B.6.2.9  | e-08  | <a href="#">G4CMU4</a> | 1 | unknown                 |
| YP_002403610.1 | + | - | + | - | + | + | + | + | 1.B.9.1.1  | 0     | <a href="#">P10384</a> | 6 | lipids (FFA) porin      |
| YP_006106711.1 | - | + | - | + | - | - | - | - | 1.B.9.1.1  | 0     | <a href="#">P10384</a> | 2 | lipids (FFA) porin      |
| YP_006105201.1 | - | + | - | + | - | - | - | - | 1.C.1.2.2  | e-23  | <a href="#">P02978</a> | 2 | cation channel (coclin) |
| YP_006104265.1 | - | + | - | - | - | - | - | - | 1.C.1.4.1  | e-08  | <a href="#">P04419</a> | 1 | nonselective channel    |
| YP_006104263.1 | - | + | - | - | - | - | - | - | 1.C.1.4.1  | e-23  | <a href="#">P09883</a> | 1 | nonselective channel    |
| YP_851309.1    | - | - | + | - | - | - | - | - | 1.C.1.4.1  | e-27  | <a href="#">P09883</a> | 1 | nonselective channel    |
| YP_002412216.1 | - | - | - | - | - | + | + | + | 1.C.10.1.1 | e-159 | <a href="#">P77335</a> | 3 | nonselective porin      |
| YP_006105538.1 | - | + | - | + | - | - | - | - | 1.C.10.1.1 | e-45  | <a href="#">P77335</a> | 2 | nonselective porin      |
| YP_006108795.1 | - | + | - | - | - | - | - | - | 1.C.11.1.3 | 0     | <a href="#">P09983</a> | 1 | cation selective porin  |
| YP_006108796.1 | - | + | - | + | - | - | - | - | 1.C.11.1.3 | e-72  | <a href="#">P09983</a> | 2 | cation selective porin  |
| YP_002273154.1 | - | - | - | - | - | - | + | - | 1.C.36.1.1 | e-168 | <a href="#">O69413</a> | 1 | protein (T3Pore)        |

1  
2  
3  
4  
5  
6  
7  
8  
9  
10  
11  
12  
13  
14  
15  
16  
17  
18  
19  
20  
21  
22  
23  
24  
25  
26  
27  
28  
29  
30  
31  
32  
33  
34  
35  
36  
37  
38  
39  
40  
41  
42  
43  
44  
45  
46  
47  
48  
49

|    |                |   |   |   |   |   |   |   |   |            |      |                        |   |                       |
|----|----------------|---|---|---|---|---|---|---|---|------------|------|------------------------|---|-----------------------|
| 4  | YP_002273153.1 | - | - | - | - | - | - | + | - | 1.C.36.1.1 | e-80 | <a href="#">Q8XC86</a> | 1 | protein (T3Pore)      |
| 5  | YP_002414816.1 | - | - | - | - | - | + | - | - | 1.C.36.3.1 | e-12 | <a href="#">Q03945</a> | 1 | protein (T3Pore)      |
| 6  | YP_002414818.1 | - | - | - | - | - | + | - | - | 1.C.36.3.2 | e-24 | <a href="#">Q56026</a> | 1 | protein (T3Pore)      |
| 7  | YP_002273155.1 | - | - | - | - | - | - | + | - | 1.C.36.5.1 | e-09 | <a href="#">Q7BVH7</a> | 1 | protein (T3Pore)      |
| 8  | YP_002271220.1 | - | - | - | - | - | - | + | - | 1.C.54.1.1 | e-23 | <a href="#">P69178</a> | 1 | protein (shiga toxin) |
| 9  | YP_002271796.1 | - | - | - | - | - | - | + | - | 1.C.54.1.1 | e-24 | <a href="#">P69178</a> | 1 | protein (shiga toxin) |
| 10 | YP_006108791.1 | - | + | - | - | - | - | - | - | 1.C.57.3.2 | 0    | <a href="#">Q8KTM3</a> | 1 | putative nonselective |
| 11 | YP_002270020.1 | - | - | - | - | - | - | + | - | 1.C.57.3.3 | e-17 | <a href="#">Q47107</a> | 1 | putative nonselective |
| 12 | YP_002269764.1 | - | - | - | - | - | - | + | - | 1.C.75.1.1 | e-34 | <a href="#">P15320</a> | 1 | nonselective          |
| 13 | YP_006104441.1 | - | + | - | + | - | - | - | - | 1.C.75.1.1 | e-41 | <a href="#">P15320</a> | 2 | nonselective          |
| 14 | YP_002271750.1 | - | - | - | - | - | - | + | - | 1.C.80.1.1 | e-08 | <a href="#">Q8KRT4</a> | 1 | nonselective          |
| 15 | YP_001463678.1 | - | - | - | - | + | - | - | - | 1.C.80.1.1 | e-08 | <a href="#">Q8KRT4</a> | 1 | nonselective          |
| 16 | YP_006107264.1 | - | + | - | - | - | - | - | - | 1.C.80.1.1 | e-08 | <a href="#">Q8KRT4</a> | 1 | nonselective          |
| 17 | YP_002332069.1 | - | - | - | - | - | + | + | + | 1.C.80.1.1 | e-09 | <a href="#">Q8KRT4</a> | 3 | nonselective          |
| 18 | NP_757241.1    | - | - | - | + | - | - | - | - | 1.C.80.1.1 | e-10 | <a href="#">Q8KRT4</a> | 1 | nonselective          |
| 19 | YP_002404416.1 | + | - | - | - | + | - | - | + | 1.C.80.1.1 | e-11 | <a href="#">Q8KRT4</a> | 3 | nonselective          |
| 20 | YP_002271743.1 | - | - | - | - | - | - | + | - | 1.C.80.1.1 | e-11 | <a href="#">Q8KRT4</a> | 1 | nonselective          |
| 21 | YP_859945.1    | - | - | + | - | - | - | - | - | 1.C.80.1.1 | e-11 | <a href="#">Q8KRT4</a> | 1 | nonselective          |
| 22 | NP_755467.1    | - | - | - | + | - | - | - | - | 1.C.80.1.1 | e-13 | <a href="#">Q8KRT4</a> | 1 | nonselective          |
| 23 | YP_006108764.1 | - | + | - | - | - | - | - | - | 1.C.80.1.1 | e-13 | <a href="#">Q8KRT4</a> | 1 | nonselective          |
| 24 | YP_002404930.1 | + | - | - | - | - | - | - | - | 1.C.80.1.1 | e-13 | <a href="#">Q8KRT4</a> | 1 | nonselective          |
| 25 | YP_002273032.1 | - | - | - | - | - | - | + | - | 1.C.80.1.1 | e-14 | <a href="#">Q8KRT4</a> | 1 | nonselective          |
| 26 | YP_006107454.1 | - | + | + | + | - | - | - | - | 1.C.80.1.1 | e-14 | <a href="#">Q8KRT4</a> | 3 | nonselective          |
| 27 | NP_757036.1    | - | - | - | + | - | - | - | - | 1.C.80.1.1 | e-15 | <a href="#">Q8KRT4</a> | 1 | nonselective          |
| 28 | YP_002414017.1 | - | - | - | - | - | + | - | - | 1.C.80.1.1 | e-18 | <a href="#">Q8KRT4</a> | 1 | nonselective          |
| 29 | YP_854256.1    | - | - | + | - | - | - | - | - | 1.C.80.1.1 | e-18 | <a href="#">Q8KRT4</a> | 1 | nonselective          |
| 30 | YP_006105224.1 | - | + | - | + | - | - | - | - | 1.C.80.1.1 | e-20 | <a href="#">Q8KRT4</a> | 2 | nonselective          |
| 31 | YP_002402825.1 | + | + | + | + | + | + | + | + | 1.C.82.1.1 | e-52 | <a href="#">Q9ZK21</a> | 8 | nonselective          |
| 32 | YP_002403628.1 | + | - | - | - | - | - | - | - | 1.C.87.1.1 | e-41 | <a href="#">P35837</a> | 1 | DNA                   |
| 33 | YP_853461.1    | - | - | + | - | - | - | - | - | 1.C.87.1.1 | e-74 | <a href="#">P35837</a> | 1 | DNA                   |

1  
2  
3  
4  
5  
6  
7  
8  
9  
10  
11  
12  
13  
14  
15  
16  
17  
18  
19  
20  
21  
22  
23  
24  
25  
26  
27  
28  
29  
30  
31  
32  
33  
34  
35  
36  
37  
38  
39  
40  
41  
42  
43  
44  
45  
46  
47  
48  
49

|    |                |   |   |   |   |   |   |   |   |             |      |                        |   |                           |
|----|----------------|---|---|---|---|---|---|---|---|-------------|------|------------------------|---|---------------------------|
| 4  | YP_852558.1    | - | - | + | - | - | - | - | - | 1.C.98.1.1  | e-18 | <a href="#">Q46670</a> | 1 | CdtB subunit              |
| 5  | YP_852556.1    | - | - | + | - | - | - | - | - | 1.C.98.1.1  | e-40 | <a href="#">Q46668</a> | 1 | CdtB subunit              |
| 6  | YP_852557.1    | - | - | + | - | - | - | - | - | 1.C.98.1.1  | e-77 | <a href="#">Q46669</a> | 1 | CdtB subunit              |
| 7  |                |   |   |   |   |   |   |   |   |             |      |                        |   |                           |
| 8  |                |   |   |   |   |   |   |   |   |             |      |                        |   | protein holin             |
| 9  | YP_002412159.1 | - | - | - | - | - | + | - | - | 1.E.1.1.1   | e-90 | <a href="#">P27360</a> | 1 | (murein hydrolase)        |
| 10 | YP_002402784.1 | + | + | + | + | + | + | - | + | 1.E.1.1.2   | e-33 | <a href="#">P77237</a> | 7 | protein holin             |
| 11 | YP_002401881.1 | + | - | - | - | - | - | - | + | 1.E.1.1.2   | e-34 | <a href="#">P77237</a> | 2 | protein holin             |
| 12 | NP_755064.1    | - | - | - | + | + | + | - | + | 1.E.1.1.2   | e-35 | <a href="#">P77237</a> | 4 | protein holin             |
| 13 | YP_002269671.1 | - | - | - | - | - | - | + | - | 1.E.1.1.3   | e-12 | <a href="#">O48430</a> | 1 | protein holin             |
| 14 | YP_002402144.1 | + | + | + | + | - | + | + | - | 1.E.1.1.3   | e-20 | <a href="#">O48430</a> | 6 | protein holin             |
| 15 | YP_002270281.1 | - | - | - | - | - | - | + | - | 1.E.1.1.3   | e-20 | <a href="#">O48430</a> | 1 | protein holin             |
| 16 | YP_002271496.1 | - | - | - | - | - | - | + | - | 1.E.1.1.3   | e-20 | O48430                 | 1 | protein holin             |
| 17 | YP_002271791.1 | - | - | - | - | - | - | + | - | 1.E.1.1.3   | e-20 | <a href="#">O48430</a> | 1 | protein holin             |
| 18 | YP_002270568.1 | - | - | - | - | - | - | + | - | 1.E.1.1.3   | e-21 | <a href="#">O48430</a> | 1 | protein holin             |
| 19 | YP_002270628.1 | - | - | - | - | - | - | + | - | 1.E.1.1.3   | e-21 | <a href="#">O48430</a> | 1 | protein holin             |
| 20 | YP_002328258.1 | - | - | - | - | - | - | + | - | 1.E.1.1.3   | e-21 | <a href="#">O48430</a> | 1 | protein holin             |
| 21 | YP_002328796.1 | - | - | - | - | - | - | + | - | 1.E.1.1.3   | e-21 | <a href="#">O48430</a> | 1 | protein holin             |
| 22 | YP_002269991.1 | - | - | - | - | - | - | + | - | 1.E.1.1.3   | e-22 | <a href="#">O48430</a> | 1 | protein holin             |
| 23 | YP_002271119.1 | - | - | - | - | - | - | + | - | 1.E.1.1.3   | e-22 | <a href="#">O48430</a> | 1 | protein holin             |
| 24 | YP_002328577.1 | - | - | - | - | - | - | + | - | 1.E.1.1.3   | e-33 | <a href="#">O48430</a> | 1 | protein holin             |
| 25 | YP_002403419.1 | + | + | + | + | + | + | + | + | 1.E.14.1.4  | e-56 | <a href="#">F4V3T5</a> | 8 | protein holin             |
| 26 | YP_006108535.1 | - | + | + | + | - | - | - | - | 1.E.14.1.9  | e-58 | <a href="#">E7UC95</a> | 3 | protein holin (autolysin) |
| 27 | YP_853473.1    | - | - | + | - | - | - | - | - | 1.E.2.1.1   | e-55 | <a href="#">P03705</a> | 1 | protein holin             |
| 28 | YP_002403164.1 | + | - | - | - | - | - | - | - | 1.E.2.1.4   | e-08 | <a href="#">Q9RIH4</a> | 1 | protein holin             |
| 29 | YP_002411737.1 | - | - | - | - | - | + | - | - | 1.E.3.1.1   | e-15 | <a href="#">P51773</a> | 1 | protein holin             |
| 30 | YP_852011.1    | - | - | + | - | - | - | + | - | 1.E.3.1.1   | e-45 | <a href="#">P51773</a> | 2 | protein holin             |
| 31 | NP_752886.1    | - | - | - | + | - | - | - | - | 1.E.7.1.3   | e-11 | <a href="#">Q54418</a> | 1 | protein holin (nuclease)  |
| 32 | YP_002404208.1 | + | + | + | + | + | + | + | + | 2.A.1.1.1   | 0    | <a href="#">P0AEP1</a> | 8 | sugar                     |
| 33 | YP_002401184.1 | + | + | + | + | + | + | + | + | 2.A.1.1.114 | 0    | <a href="#">P31679</a> | 8 | sugar                     |
| 34 | YP_002403001.1 | + | + | + | + | + | + | + | + | 2.A.1.1.115 | 0    | <a href="#">P76230</a> | 8 | sugar                     |



1  
2  
3  
4  
5  
6  
7  
8  
9  
10  
11  
12  
13  
14  
15  
16  
17  
18  
19  
20  
21  
22  
23  
24  
25  
26  
27  
28  
29  
30  
31  
32  
33  
34  
35  
36  
37  
38  
39  
40  
41  
42  
43  
44  
45  
46  
47  
48  
49

|                |   |   |   |   |   |   |   |   |             |       |                        |   |                        |
|----------------|---|---|---|---|---|---|---|---|-------------|-------|------------------------|---|------------------------|
| YP_002404104.1 | + | + | + | + | + | + | + | + | 2.A.1.1.2   | 0     | <a href="#">P0AE24</a> | 8 | sugar                  |
| YP_002405405.1 | + | - | - | - | + | - | + | + | 2.A.1.1.3   | 0     | <a href="#">P0AGF4</a> | 4 | sugar                  |
| YP_002402995.1 | + | + | + | + | + | + | + | + | 2.A.1.1.92  | 0     | <a href="#">P38055</a> | 8 | sugar                  |
| YP_002404037.1 | + | + | - | + | + | + | - | + | 2.A.1.1.95  | 0     | <a href="#">Q46909</a> | 6 | sugar                  |
| YP_002405261.1 | + | + | + | + | - | - | - | - | 2.A.1.1.95  | e-16  | <a href="#">Q46909</a> | 4 | sugar                  |
| YP_853986.1    | - | - | + | - | - | - | - | - | 2.A.1.1.95  | e-166 | <a href="#">Q46909</a> | 1 | sugar                  |
| YP_002404229.1 | + | + | + | + | + | + | + | + | 2.A.1.10.1  | 0     | <a href="#">P0AFF4</a> | 8 | nucleoside             |
| YP_002403708.1 | + | + | + | + | - | - | - | + | 2.A.1.10.2  | 0     | <a href="#">P45562</a> | 5 | nucleoside             |
| YP_002403383.1 | + | + | + | + | + | + | + | + | 2.A.1.10.4  | 0     | <a href="#">P76417</a> | 8 | nucleoside             |
| YP_002404931.1 | + | + | + | + | + | + | + | + | 2.A.1.11.3  | e-177 | <a href="#">P37662</a> | 8 | di carboxylate         |
| YP_002404590.1 | + | + | + | + | + | + | + | + | 2.A.1.12.1  | 0     | <a href="#">P41036</a> | 8 | sugar derivative       |
| YP_006107307.1 | - | + | - | + | - | + | - | - | 2.A.1.12.1  | 0     | <a href="#">P41036</a> | 3 | sugar derivative       |
| YP_002415427.1 | - | - | - | - | - | + | - | + | 2.A.1.12.1  | e-76  | <a href="#">P41036</a> | 2 | sugar derivative       |
| YP_002404055.1 | + | + | + | + | + | + | + | + | 2.A.1.14.1  | e-171 | <a href="#">P42237</a> | 8 | di carboxylate         |
| YP_002404499.1 | + | + | + | + | + | + | + | + | 2.A.1.14.14 | 0     | <a href="#">Q8FDB7</a> | 8 | di carboxylate         |
| YP_002404464.1 | + | + | + | + | + | + | + | + | 2.A.1.14.2  | 0     | <a href="#">P0AA78</a> | 8 | di carboxylate         |
| NP_756357.1    | - | - | - | + | - | - | - | - | 2.A.1.14.2  | e-103 | <a href="#">P0AA78</a> | 1 | di carboxylate         |
| YP_006108681.1 | - | + | + | + | - | - | - | - | 2.A.1.14.2  | e-120 | <a href="#">P0AA78</a> | 3 | di carboxylate         |
| YP_002411759.1 | - | - | - | - | - | + | - | - | 2.A.1.14.2  | e-99  | <a href="#">P0AA78</a> | 1 | di carboxylate         |
| YP_002405861.1 | + | - | - | - | + | - | + | + | 2.A.1.14.33 | 0     | <a href="#">P39398</a> | 4 | di carboxylate         |
| YP_002405343.1 | + | + | + | + | + | - | - | - | 2.A.1.14.33 | e-132 | <a href="#">P39398</a> | 4 | di carboxylate         |
| YP_006106617.1 | - | + | + | + | - | + | + | + | 2.A.1.14.35 | 0     | <a href="#">P76470</a> | 6 | unknown                |
| YP_002271658.1 | - | - | - | - | - | - | + | + | 2.A.1.14.35 | e-95  | <a href="#">P76470</a> | 2 | unknown                |
| YP_002405080.1 | + | + | + | + | + | + | - | + | 2.A.1.14.7  | 0     | <a href="#">P0AA76</a> | 7 | di carboxylate         |
| YP_002415545.1 | - | - | - | - | - | + | - | - | 2.A.1.14.9  | 0     | <a href="#">Q9RPV1</a> | 1 | aromatic carboxylate   |
| YP_001463490.1 | - | - | - | - | + | - | + | - | 2.A.1.15.1  | e-82  | <a href="#">Q51955</a> | 2 | aromatic acid          |
| YP_002402918.1 | + | + | + | + | + | + | + | + | 2.A.1.15.12 | 0     | <a href="#">P76197</a> | 8 | putative aromatic acid |
| YP_002402919.1 | + | + | + | + | + | + | + | + | 2.A.1.15.13 | 0     | <a href="#">P76198</a> | 8 | putative aromatic acid |

1  
2  
3  
4  
5  
6  
7  
8  
9  
10  
11  
12  
13  
14  
15  
16  
17  
18  
19  
20  
21  
22  
23  
24  
25  
26  
27  
28  
29  
30  
31  
32  
33  
34  
35  
36  
37  
38  
39  
40  
41  
42  
43  
44  
45  
46  
47  
48  
49

|                |   |   |   |   |   |   |   |   |                    |       |                        |   |                    |
|----------------|---|---|---|---|---|---|---|---|--------------------|-------|------------------------|---|--------------------|
| YP_002401484.1 | + | - | - | - | + | + | + | + | <b>2.A.1.15.2</b>  | e-180 | <a href="#">P77589</a> | 5 | aromatic acid      |
| YP_002401472.1 | + | - | - | - | + | + | + | + | <b>2.A.1.17.1</b>  | e-165 | <a href="#">P17583</a> | 5 | anion              |
| YP_002403017.1 | + | + | + | + | + | + | + | + | <b>2.A.1.17.3</b>  | 0     | <a href="#">P76242</a> | 8 | putative anion     |
| YP_002401523.1 | + | + | + | + | + | + | + | + | <b>2.A.1.2.14</b>  | 0     | <a href="#">P23910</a> | 8 | sugar              |
| YP_002402732.1 | + | + | + | + | + | + | + | + | <b>2.A.1.2.15</b>  | 0     | <a href="#">P31122</a> | 8 | sugar              |
| YP_002401983.1 | + | + | + | + | + | + | + | + | <b>2.A.1.2.19</b>  | 0     | <a href="#">P0AEY8</a> | 8 | multidrug          |
| YP_002402255.1 | + | + | + | + | + | + | - | + | <b>2.A.1.2.20</b>  | 0     | <a href="#">P25744</a> | 7 | multidrug          |
| YP_002402266.1 | + | + | + | + | + | + | + | + | <b>2.A.1.2.21</b>  | 0     | <a href="#">P69367</a> | 8 | multidrug          |
| YP_002405100.1 | + | + | + | + | + | + | + | + | <b>2.A.1.2.22</b>  | 0     | <a href="#">P31462</a> | 8 | specific drug      |
| YP_002405051.1 | + | + | + | + | + | + | - | + | <b>2.A.1.2.26</b>  | 0     | <a href="#">P0ADL1</a> | 7 | nucleoside         |
| YP_002411081.1 | - | - | - | - | - | + | + | - | <b>2.A.1.2.26</b>  | e-66  | P0ADL1                 | 2 | nucleoside         |
| YP_002405849.1 | + | - | - | - | + | + | + | + | <b>2.A.1.2.52</b>  | 0     | <a href="#">P39386</a> | 5 | multidrug          |
| YP_002402744.1 | + | + | + | + | + | + | + | + | <b>2.A.1.2.55</b>  | 0     | <a href="#">P31126</a> | 8 | peptide            |
| YP_002401554.1 | + | + | + | + | + | + | + | + | <b>2.A.1.2.60</b>  | 0     | <a href="#">P77726</a> | 8 | unknown            |
| YP_002402890.1 | + | + | + | + | + | + | + | + | <b>2.A.1.2.62</b>  | 0     | <a href="#">P37597</a> | 8 | unknown            |
| YP_002402887.1 | + | + | + | + | + | + | + | + | <b>2.A.1.2.65</b>  | 0     | <a href="#">P77389</a> | 8 | unknown            |
| YP_002405715.1 | + | - | - | - | - | - | - | - | <b>2.A.1.2.68</b>  | 0     | <a href="#">P02980</a> | 1 | specific drug      |
| YP_002403464.1 | + | + | + | + | + | + | + | + | <b>2.A.1.2.7</b>   | 0     | <a href="#">P28246</a> | 8 | multidrug          |
| YP_002270349.1 | - | - | - | - | - | - | + | - | <b>2.A.1.2.7</b>   | e-34  | <a href="#">P28246</a> | 1 | multidrug          |
| YP_006105663.1 | - | + | + | + | - | - | - | - | <b>2.A.1.2.7</b>   | e-35  | <a href="#">P28246</a> | 3 | multidrug          |
| YP_002405064.1 | + | + | + | + | + | + | + | + | <b>2.A.1.2.9</b>   | e-163 | <a href="#">P31442</a> | 8 | multidrug          |
| YP_002401207.1 | + | - | - | - | + | - | - | + | <b>2.A.1.20.1</b>  | 0     | <a href="#">P31675</a> | 3 | sugar              |
| YP_002403451.1 | + | + | + | + | + | + | + | + | <b>2.A.1.20.2</b>  | 0     | <a href="#">P33026</a> | 8 | sugar              |
| YP_002405047.1 | + | - | - | - | + | + | - | + | <b>2.A.1.20.3</b>  | 0     | <a href="#">P31436</a> | 4 | sugar              |
| YP_002415416.1 | - | - | - | - | - | + | - | - | <b>2.A.1.21.11</b> | e-23  | <a href="#">D3Q871</a> | 1 | unknown            |
| YP_002401563.1 | + | + | + | + | + | + | + | + | <b>2.A.1.25.2</b>  | 0     | <a href="#">P0AE16</a> | 8 | cofactor substrate |
| YP_002402038.1 | + | + | + | + | + | + | + | + | <b>2.A.1.26.1</b>  | 0     | <a href="#">P21503</a> | 8 | unknown            |
| YP_002403830.1 | + | + | + | + | + | + | + | + | <b>2.A.1.27.1</b>  | 0     | <a href="#">Q47142</a> | 8 | aromatic           |
| YP_002403061.1 | + | + | + | + | + | + | + | + | <b>2.A.1.3.17</b>  | 0     | <a href="#">P76269</a> | 8 | specific drug      |
| YP_002403545.1 | + | + | + | + | + | + | + | + | <b>2.A.1.3.17</b>  | e-31  | <a href="#">P76269</a> | 8 | specific drug      |

1  
2  
3  
4  
5  
6  
7  
8  
9  
10  
11  
12  
13  
14  
15  
16  
17  
18  
19  
20  
21  
22  
23  
24  
25  
26  
27  
28  
29  
30  
31  
32  
33  
34  
35  
36  
37  
38  
39  
40  
41  
42  
43  
44  
45  
46  
47  
48  
49

|                |   |   |   |   |   |   |   |   |            |       |                        |   |                  |
|----------------|---|---|---|---|---|---|---|---|------------|-------|------------------------|---|------------------|
| YP_852504.1    | - | - | + | + | - | - | - | - | 2.A.1.3.18 | e-70  | <a href="#">Q9KIH3</a> | 2 | multidrug        |
| YP_002403949.1 | + | + | + | + | + | + | + | + | 2.A.1.3.2  | 0     | <a href="#">P0AEJ0</a> | 8 | multidrug        |
| YP_002403366.1 | + | + | + | + | + | + | + | + | 2.A.1.3.26 | 0     | <a href="#">P36554</a> | 8 | multidrug        |
| YP_002403676.1 | + | + | + | + | + | + | + | + | 2.A.1.3.36 | 0     | <a href="#">C5W789</a> | 8 | multidrug        |
| YP_002403677.1 | + | + | + | + | + | + | + | + | 2.A.1.3.36 | 0     | <a href="#">C5W790</a> | 8 | multidrug        |
| YP_002405147.1 | + | + | + | + | + | + | + | + | 2.A.1.3.51 | 0     | <a href="#">P31474</a> | 8 | unknown          |
| YP_002401608.1 | + | + | + | + | + | + | + | + | 2.A.1.35.1 | 0     | <a href="#">P52067</a> | 8 | specific drug    |
| YP_002405358.1 | + | + | + | + | + | + | + | + | 2.A.1.36.1 | 0     | <a href="#">P43531</a> | 8 | aromatic amine   |
| YP_002403944.1 | + | + | + | + | + | + | + | - | 2.A.1.36.3 | 0     | <a href="#">P76628</a> | 7 | unknown          |
| YP_002401699.1 | + | + | + | + | + | + | + | + | 2.A.1.38.1 | e-163 | <a href="#">P24077</a> | 8 | siderophore      |
| YP_002405055.1 | + | + | + | + | + | + | + | + | 2.A.1.4.1  | 0     | <a href="#">P0AGC0</a> | 8 | anion            |
| YP_854265.1    | - | - | + | + | - | - | - | - | 2.A.1.4.2  | 0     | <a href="#">P12681</a> | 2 | anion            |
| YP_002403513.1 | + | + | + | + | + | + | + | + | 2.A.1.4.3  | 0     | <a href="#">P08194</a> | 8 | anion            |
| YP_002405056.1 | + | + | + | + | + | + | + | + | 2.A.1.4.4  | 0     | <a href="#">P09836</a> | 8 | anion            |
| YP_002269002.1 | - | - | - | - | - | - | + | - | 2.A.1.4.4  | e-96  | <a href="#">P09836</a> | 1 | anion            |
| YP_002404098.1 | + | + | + | + | + | + | + | + | 2.A.1.42.1 | 0     | <a href="#">P39196</a> | 8 | lysophospholipid |
| YP_002404099.1 | + | + | + | + | + | + | + | + | 2.A.1.42.2 | e-176 | <a href="#">Q89556</a> | 8 | lysophospholipid |
| YP_002413287.1 | - | - | - | - | - | + | + | - | 2.A.1.46.5 | e-52  | <a href="#">C2UR80</a> | 2 | unknown          |
| YP_002403588.1 | + | + | + | - | - | + | + | + | 2.A.1.46.6 | 0     | <a href="#">P77549</a> | 6 | unknown          |
| YP_001463667.1 | - | - | - | - | + | - | - | - | 2.A.1.46.6 | e-175 | <a href="#">P77549</a> | 1 | unknown          |
| YP_002404823.1 | + | + | + | + | + | + | + | + | 2.A.1.46.7 | 0     | <a href="#">P37621</a> | 8 | unknown          |
| YP_002401474.1 | + | + | + | + | + | + | + | + | 2.A.1.5.1  | 0     | <a href="#">P02920</a> | 8 | sugar            |
| YP_001464380.1 | - | - | - | - | + | - | - | - | 2.A.1.5.2  | 0     | <a href="#">P16552</a> | 1 | sugar            |
| YP_002403671.1 | + | - | - | - | + | + | - | - | 2.A.1.5.3  | 0     | <a href="#">P30000</a> | 3 | sugar            |
| YP_002405843.1 | + | + | + | + | + | + | - | + | 2.A.1.51.2 | e-162 | <a href="#">D6IHN4</a> | 7 | unknown          |
| YP_002273858.1 | - | - | - | - | - | - | + | - | 2.A.1.51.2 | e-174 | <a href="#">D6IHN4</a> | 1 | unknown          |
| YP_002405255.1 | + | + | - | + | + | + | + | + | 2.A.1.52.1 | 0     | <a href="#">P32135</a> | 7 | unknown          |
| YP_859960.1    | - | - | + | - | - | - | - | - | 2.A.1.52.1 | e-65  | <a href="#">P32135</a> | 1 | unknown          |
| YP_002404040.1 | + | + | + | + | + | + | + | + | 2.A.1.52.2 | 0     | <a href="#">F4TJX1</a> | 8 | unknown          |
| YP_006108420.1 | - | + | + | + | - | - | + | - | 2.A.1.6.1  | e-60  | <a href="#">P16482</a> | 4 | tri carboxylate  |

1  
2  
3  
4  
5  
6  
7  
8  
9  
10  
11  
12  
13  
14  
15  
16  
17  
18  
19  
20  
21  
22  
23  
24  
25  
26  
27  
28  
29  
30  
31  
32  
33  
34  
35  
36  
37  
38  
39  
40  
41  
42  
43  
44  
45  
46  
47  
48  
49

|                |   |   |   |   |   |   |   |   |             |       |                        |   |                                   |
|----------------|---|---|---|---|---|---|---|---|-------------|-------|------------------------|---|-----------------------------------|
| YP_002404899.1 | + | + | + | + | + | + | + | + | 2.A.1.6.10  | 0     | <a href="#">P37643</a> | 8 | unknown                           |
| YP_002403883.1 | + | + | + | + | + | + | + | + | 2.A.1.6.2   | 0     | <a href="#">POAEX3</a> | 8 | dicarboxylate                     |
| YP_002405480.1 | + | + | + | + | + | + | + | + | 2.A.1.6.4   | 0     | <a href="#">POCOL7</a> | 8 | nonspecific                       |
| YP_002403260.1 | + | + | + | + | + | + | + | + | 2.A.1.6.6   | 0     | <a href="#">P76350</a> | 8 | monocarboxylate                   |
| YP_002405262.1 | + | + | + | + | - | - | - | - | 2.A.1.6.6   | e-85  | <a href="#">P76350</a> | 4 | monocarboxylate                   |
| YP_002402753.1 | + | + | - | + | + | + | + | - | 2.A.1.6.9   | 0     | <a href="#">P77228</a> | 6 | unknown                           |
| YP_006108502.1 | - | + | + | + | - | - | - | - | 2.A.1.6.9   | e-60  | <a href="#">P77228</a> | 3 | unknown                           |
| YP_002401986.1 | + | + | + | + | + | + | + | + | 2.A.1.60.2  | 0     | <a href="#">P75810</a> | 8 | sugar derivative                  |
| YP_002404067.1 | + | + | + | + | + | + | + | + | 2.A.1.7.1   | 0     | <a href="#">P11551</a> | 8 | sugar                             |
| YP_002405788.1 | + | + | - | + | - | - | - | - | 2.A.1.7.5   | 0     | <a href="#">Q8XEV7</a> | 3 | sugar derivative                  |
| YP_002402406.1 | + | + | + | + | + | + | + | + | 2.A.1.8.1   | 0     | <a href="#">P10903</a> | 8 | anion (nitrate/nitrite)           |
| YP_002402675.1 | + | + | + | + | + | + | + | + | 2.A.1.8.10  | 0     | <a href="#">P37758</a> | 8 | anion                             |
| YP_002405291.1 | + | + | + | + | + | + | + | + | 2.A.10.1.2  | e-124 | <a href="#">POA712</a> | 8 | monocarboxylate                   |
| YP_002273395.1 | - | - | - | - | - | - | + | - | 2.A.102.2.2 | e-09  | <a href="#">Q2BM66</a> | 1 | aromatic<br>(4-toulene sulfonate) |
| YP_002403593.1 | + | + | + | + | + | + | + | + | 2.A.102.3.1 | e-142 | <a href="#">POAD30</a> | 8 | unknown                           |
| YP_002401225.1 | + | + | + | + | + | + | + | + | 2.A.103.1.1 | 0     | <a href="#">POABG4</a> | 8 | polysaccharide (murein)           |
| YP_002401741.1 | + | + | + | + | + | + | + | + | 2.A.103.1.2 | e-164 | <a href="#">POABG7</a> | 8 | polysaccharide (murein)           |
| YP_002403934.1 | + | + | + | + | + | + | + | + | 2.A.104.1.1 | e-72  | <a href="#">A8ANM6</a> | 8 | amino acid (L alanine)            |
| YP_002405555.1 | + | + | + | + | + | + | + | + | 2.A.13.1.1  | 0     | <a href="#">POABN5</a> | 8 | dicarboxylate                     |
| YP_002405492.1 | + | + | + | + | - | + | + | + | 2.A.13.1.2  | 0     | <a href="#">POABN9</a> | 7 | dicarboxylate                     |
| YP_002404994.1 | + | + | + | + | + | + | + | + | 2.A.14.1.1  | 0     | <a href="#">P33231</a> | 8 | monocarboxylate                   |
| YP_002404346.1 | + | + | + | + | + | + | - | + | 2.A.14.1.2  | 0     | <a href="#">Q46839</a> | 7 | monocarboxylate                   |
| YP_002401440.1 | + | + | + | + | + | + | + | + | 2.A.15.1.4  | 0     | <a href="#">POABC9</a> | 8 | amine                             |
| YP_002405797.1 | + | - | - | - | + | + | - | - | 2.A.15.1.9  | e-169 | <a href="#">Q6F754</a> | 3 | amine                             |
| YP_002401179.1 | + | + | + | + | + | + | + | + | 2.A.15.2.1  | 0     | <a href="#">P31553</a> | 8 | amine                             |
| YP_859962.1    | - | - | + | - | - | - | - | - | 2.A.15.2.2  | e-68  | <a href="#">B4EY22</a> | 1 | amine                             |
| YP_002403030.1 | + | - | - | - | + | + | + | + | 2.A.15.2.3  | 0     | <a href="#">POABD2</a> | 5 | unknown                           |
| YP_002402636.1 | + | + | + | + | + | + | + | + | 2.A.16.1.1  | e-178 | <a href="#">P25396</a> | 8 | anion                             |
| YP_006107836.1 | - | + | - | + | - | - | - | - | 2.A.16.2.2  | e-09  | <a href="#">Q5EAK4</a> | 2 | dicarboxylate                     |

1  
2  
3

|    |                |   |   |   |   |   |   |   |   |            |       |                        |   |                      |
|----|----------------|---|---|---|---|---|---|---|---|------------|-------|------------------------|---|----------------------|
| 4  | YP_002405210.1 | + | + | + | + | + | + | + | + | 2.A.16.2.2 | e-25  | <a href="#">Q5EAK4</a> | 8 | dicarboxylate        |
| 5  | YP_002402864.1 | + | + | + | + | + | + | + | + | 2.A.17.1.2 | 0     | <a href="#">P77304</a> | 8 | peptide              |
| 6  | YP_002404869.1 | + | + | + | + | + | + | + | + | 2.A.17.1.3 | 0     | <a href="#">P36837</a> | 8 | peptide              |
| 7  | YP_002401799.1 | + | + | + | + | + | + | + | + | 2.A.17.1.4 | 0     | <a href="#">P75742</a> | 8 | peptide              |
| 8  | YP_002405500.1 | + | + | + | + | + | + | + | + | 2.A.17.1.5 | 0     | <a href="#">P39276</a> | 8 | peptide              |
| 9  | YP_002402399.1 | + | + | + | + | + | + | + | + | 2.A.19.1.1 | e-166 | <a href="#">P31801</a> | 8 | cation (Ca 2+)       |
| 10 | YP_002404568.1 | + | + | + | + | + | + | + | + | 2.A.19.5.1 | e-149 | <a href="#">P45394</a> | 8 | cation (Ca 2+)       |
| 11 | YP_002405489.1 | + | - | - | - | + | + | + | + | 2.A.2.1.1  | 0     | <a href="#">A7ZU20</a> | 5 | sugar                |
| 12 | YP_002402845.1 | + | + | + | + | + | + | + | + | 2.A.2.3.1  | 0     | <a href="#">POCE45</a> | 8 | monocarboxylate      |
| 13 | YP_002405045.1 | + | + | + | + | + | + | + | + | 2.A.2.3.4  | 0     | <a href="#">P31435</a> | 8 | sugar                |
| 14 | YP_002414739.1 | - | - | - | - | + | + | - | + | 2.A.2.3.4  | e-72  | <a href="#">P31435</a> | 2 | sugar                |
| 15 | YP_001465361.1 | - | - | - | - | + | + | + | + | 2.A.2.3.9  | 0     | <a href="#">P32137</a> | 4 | unknown              |
| 16 | YP_001465360.1 | - | - | - | - | + | + | + | + | 2.A.2.3.9  | e-179 | <a href="#">P32137</a> | 4 | unknown              |
| 17 | YP_006104421.1 | - | + | - | + | - | - | - | - | 2.A.2.5.1  | e-153 | <a href="#">Q93KC2</a> | 2 | sugar derivative     |
| 18 | YP_002404866.1 | + | + | + | + | + | + | + | + | 2.A.20.1.1 | 0     | <a href="#">P0AFJ7</a> | 8 | anion                |
| 19 | YP_002404363.1 | + | + | + | + | + | + | + | + | 2.A.20.1.2 | 0     | <a href="#">P43676</a> | 8 | anion                |
| 20 | YP_002404624.1 | + | + | + | + | + | + | + | + | 2.A.21.1.1 | 0     | <a href="#">P16256</a> | 8 | enzyme cofactor (B5) |
| 21 | YP_002402218.1 | + | + | + | + | + | + | + | + | 2.A.21.2.1 | 0     | <a href="#">P07117</a> | 8 | amino acid (proline) |
| 22 | YP_002405070.1 | + | + | + | + | + | + | + | + | 2.A.21.3.9 | e-74  | <a href="#">A8H019</a> | 8 | sugar                |
| 23 | YP_002405443.1 | + | + | + | + | + | + | + | + | 2.A.21.7.2 | 0     | <a href="#">P32705</a> | 8 | monocarboxylate      |
| 24 | YP_002401677.1 | + | + | + | + | + | + | + | + | 2.A.21.9.1 | e-18  | <a href="#">Q9HV74</a> | 8 | unknown              |
| 25 | YP_002404754.1 | + | + | + | + | + | + | + | + | 2.A.21.9.1 | e-10  | <a href="#">Q9HV74</a> | 8 | unknown              |
| 26 | YP_002404838.1 | + | - | - | - | - | - | - | - | 2.A.21.9.1 | e-11  | <a href="#">Q9HV74</a> | 1 | unknown              |
| 27 | YP_002403367.1 | + | + | + | + | + | + | + | + | 2.A.21.9.1 | e-13  | <a href="#">Q9HV74</a> | 8 | unknown              |
| 28 | YP_002405481.1 | + | + | + | + | + | + | + | + | 2.A.21.9.1 | e-13  | <a href="#">Q9HV74</a> | 8 | unknown              |
| 29 | YP_002405902.1 | + | + | + | + | + | + | + | + | 2.A.21.9.1 | e-15  | <a href="#">Q9HV74</a> | 8 | unknown              |
| 30 | YP_854267.1    | - | - | + | + | - | - | - | - | 2.A.21.9.1 | e-16  | <a href="#">Q9HV74</a> | 2 | unknown              |
| 31 | YP_002405249.1 | + | + | + | + | + | + | + | + | 2.A.21.9.1 | e-19  | <a href="#">Q9HV74</a> | 8 | unknown              |
| 32 | YP_006108520.1 | - | + | + | + | - | - | - | - | 2.A.21.9.1 | e-19  | <a href="#">Q9HV74</a> | 3 | unknown              |
| 33 | YP_002404853.1 | + | - | - | - | - | - | - | - | 2.A.21.9.1 | e-21  | <a href="#">Q9HV74</a> | 1 | unknown              |

45  
46  
47  
48  
49

1  
2  
3  
4  
5  
6  
7  
8  
9  
10  
11  
12  
13  
14  
15  
16  
17  
18  
19  
20  
21  
22  
23  
24  
25  
26  
27  
28  
29  
30  
31  
32  
33  
34  
35  
36  
37  
38  
39  
40  
41  
42  
43  
44  
45  
46  
47  
48  
49

|                |   |   |   |   |   |   |   |   |                   |       |                        |   |                    |
|----------------|---|---|---|---|---|---|---|---|-------------------|-------|------------------------|---|--------------------|
| YP_002405378.1 | + | + | + | + | + | + | + | - | <b>2.A.21.9.1</b> | e-23  | <a href="#">Q9HV74</a> | 7 | unknown            |
| YP_002273636.1 | - | - | - | - | - | - | + | - | <b>2.A.21.9.1</b> | e-23  | <a href="#">Q9HV74</a> | 1 | unknown            |
| YP_006106592.1 | - | + | + | + | - | + | - | + | <b>2.A.21.9.1</b> | e-32  | <a href="#">Q9HV74</a> | 5 | unknown            |
| YP_002402330.1 | + | + | + | + | + | + | + | + | <b>2.A.21.9.2</b> | e-08  | <a href="#">Q93N33</a> | 8 | unknown            |
| YP_002403679.1 | + | + | + | + | + | + | + | + | <b>2.A.21.9.2</b> | e-09  | <a href="#">Q93N33</a> | 8 | unknown            |
| YP_002403240.1 | + | + | + | + | + | + | + | + | <b>2.A.21.9.2</b> | e-11  | <a href="#">Q93N33</a> | 8 | unknown            |
| YP_002403850.1 | + | + | + | + | + | + | + | + | <b>2.A.21.9.2</b> | e-12  | <a href="#">Q93N33</a> | 8 | unknown            |
| YP_002401527.1 | + | + | + | + | + | + | + | + | <b>2.A.21.9.2</b> | e-13  | <a href="#">Q93N33</a> | 8 | unknown            |
| YP_002405293.1 | + | + | + | + | + | + | + | + | <b>2.A.21.9.2</b> | e-13  | <a href="#">Q93N33</a> | 8 | unknown            |
| YP_002402838.1 | + | + | + | + | + | + | + | + | <b>2.A.21.9.2</b> | e-15  | <a href="#">Q93N33</a> | 8 | unknown            |
| YP_006108802.1 | - | + | - | + | - | - | - | - | <b>2.A.21.9.2</b> | e-15  | <a href="#">Q93N33</a> | 2 | unknown            |
| YP_002403498.1 | + | + | + | + | + | + | + | + | <b>2.A.21.9.2</b> | e-16  | <a href="#">Q93N33</a> | 8 | unknown            |
| YP_002404582.1 | + | + | + | + | + | + | + | + | <b>2.A.21.9.2</b> | e-18  | <a href="#">Q93N33</a> | 8 | unknown            |
| YP_002402195.1 | + | + | + | + | + | + | + | + | <b>2.A.21.9.2</b> | e-19  | <a href="#">Q93N33</a> | 8 | unknown            |
| YP_002404712.1 | + | + | + | + | + | + | + | + | <b>2.A.21.9.2</b> | e-20  | <a href="#">Q93N33</a> | 8 | unknown            |
| YP_006107064.1 | - | + | + | + | + | + | + | + | <b>2.A.21.9.2</b> | e-21  | <a href="#">Q93N33</a> | 7 | unknown            |
| YP_002405453.1 | + | + | + | + | + | + | + | + | <b>2.A.23.1.1</b> | 0     | <a href="#">P21345</a> | 8 | AA & dicarboxylate |
| YP_002411569.1 | - | - | - | - | - | + | + | - | <b>2.A.23.1.2</b> | e-77  | <a href="#">P24943</a> | 2 | AA & dicarboxylate |
| YP_002402955.1 | + | + | + | + | + | + | + | + | <b>2.A.23.1.4</b> | e-93  | <a href="#">P54596</a> | 8 | amino acid         |
| YP_002404905.1 | + | + | + | + | + | + | + | + | <b>2.A.23.1.7</b> | 0     | <a href="#">P0A830</a> | 8 | dicarboxylate      |
| YP_002404460.1 | + | + | + | + | + | + | + | + | <b>2.A.23.4.1</b> | e-177 | <a href="#">P0AGE4</a> | 8 | amino acid         |
| YP_002401150.1 | + | + | + | + | + | + | + | + | <b>2.A.25.1.5</b> | e-96  | <a href="#">Q45068</a> | 8 | amino acid         |
| YP_002401529.1 | + | + | + | + | + | + | + | + | <b>2.A.26.1.2</b> | e-158 | <a href="#">P25185</a> | 8 | amino acid         |
| YP_002405041.1 | + | + | + | + | + | + | + | + | <b>2.A.27.1.1</b> | e-178 | <a href="#">P0AER8</a> | 8 | amino acid         |
| YP_002405708.1 | + | - | - | - | - | - | - | - | <b>2.A.27.1.1</b> | e-28  | <a href="#">P0AER8</a> | 1 | amino acid         |
| YP_002405710.1 | + | - | - | - | - | - | - | - | <b>2.A.27.1.1</b> | e-63  | <a href="#">P0AER8</a> | 1 | amino acid         |
| YP_002401683.1 | + | + | + | + | + | + | + | + | <b>2.A.3.1.1</b>  | 0     | <a href="#">P24207</a> | 8 | amino acid         |
| YP_002402539.1 | + | - | - | - | + | + | + | + | <b>2.A.3.1.13</b> | 0     | <a href="#">P76037</a> | 5 | amine              |
| YP_002403306.1 | + | + | + | + | + | + | + | + | <b>2.A.3.1.14</b> | 0     | <a href="#">P0AA47</a> | 8 | amine              |
| YP_002405181.1 | + | + | + | + | + | + | + | + | <b>2.A.3.1.15</b> | 0     | <a href="#">P27837</a> | 8 | unknown            |

1  
2  
3  
4  
5  
6  
7  
8  
9  
10  
11  
12  
13  
14  
15  
16  
17  
18  
19  
20  
21  
22  
23  
24  
25  
26  
27  
28  
29  
30  
31  
32  
33  
34  
35  
36  
37  
38  
39  
40  
41  
42  
43  
44  
45  
46  
47  
48  
49

|                |   |   |   |   |   |   |   |   |   |            |       |                        |   |                         |
|----------------|---|---|---|---|---|---|---|---|---|------------|-------|------------------------|---|-------------------------|
| YP_002403437.1 | + | + | + | + | + | + | + | + | + | 2.A.3.1.2  | 0     | <a href="#">P25737</a> | 8 | amino acid              |
| YP_002401245.1 | + | + | + | + | + | + | + | + | + | 2.A.3.1.3  | 0     | <a href="#">P15993</a> | 8 | amino acid              |
| YP_002403927.1 | + | + | + | + | + | + | + | + | + | 2.A.3.1.4  | 0     | <a href="#">P25527</a> | 8 | amine                   |
| YP_002401530.1 | + | + | + | + | + | + | + | + | + | 2.A.3.1.6  | 0     | <a href="#">P37460</a> | 8 | amino acid              |
| YP_002405628.1 | + | + | + | + | + | + | + | + | + | 2.A.3.1.7  | 0     | <a href="#">P0AAE0</a> | 8 | amino acid              |
| YP_002402662.1 | + | + | + | + | + | + | + | + | + | 2.A.3.1.8  | 0     | <a href="#">P40812</a> | 8 | amino acid              |
| YP_002405558.1 | + | + | + | + | + | + | + | + | + | 2.A.3.13.1 | 0     | <a href="#">P39277</a> | 8 | amino acid              |
| YP_002401785.1 | + | + | + | + | + | - | + | + | + | 2.A.3.2.1  | 0     | <a href="#">P0AAF1</a> | 7 | amine                   |
| YP_002405502.1 | + | + | + | + | + | + | + | + | + | 2.A.3.2.2  | 0     | <a href="#">P0AAE8</a> | 8 | AA/amine antiport       |
| YP_002405484.1 | + | + | + | + | + | + | + | + | + | 2.A.3.2.5  | 0     | <a href="#">P60061</a> | 8 | AA/amine antiport       |
| YP_859798.1    | - | - | + | + | - | - | - | - | - | 2.A.3.2.7  | e-117 | <a href="#">Q9Z6M8</a> | 2 | AA/amine antiport       |
| YP_859796.1    | - | - | + | + | - | - | - | - | - | 2.A.3.2.7  | e-128 | <a href="#">Q9Z6M8</a> | 2 | AA/amine antiport       |
| YP_002402834.1 | + | + | + | + | + | + | + | + | + | 2.A.3.2.8  | 0     | <a href="#">P0AAE5</a> | 8 | AA/amine antiport       |
| YP_002401615.1 | + | + | + | + | + | + | + | + | + | 2.A.3.6.4  | 0     | <a href="#">P77400</a> | 8 | unknown                 |
| YP_002402039.1 | + | - | - | - | + | + | + | + | + | 2.A.3.7.2  | 0     | <a href="#">P75835</a> | 5 | unknown                 |
| YP_002402696.1 | + | + | + | + | + | + | + | + | + | 2.A.3.7.3  | 0     | <a href="#">C8U8G2</a> | 8 | glutamate /amine (GABA) |
| YP_002404449.1 | + | + | + | + | + | + | + | + | + | 2.A.3.7.4  | 0     | <a href="#">P42590</a> | 8 | unknown                 |
| YP_002405575.1 | + | + | + | + | + | + | + | + | + | 2.A.3.7.5  | 0     | <a href="#">P39282</a> | 8 | unknown                 |
| YP_002404718.1 | + | - | - | - | + | - | + | + | + | 2.A.3.8.17 | 0     | <a href="#">P45539</a> | 4 | amino acid              |
| YP_002401158.1 | + | + | + | + | + | + | + | + | + | 2.A.33.1.1 | e-174 | <a href="#">P13738</a> | 8 | cation (Na +)           |
| YP_002402367.1 | + | + | + | + | + | + | + | + | + | 2.A.34.1.1 | 0     | <a href="#">P0AFA7</a> | 8 | cation (Na +)           |
| YP_859969.1    | - | - | + | - | - | - | - | - | - | 2.A.35.1.1 | e-59  | <a href="#">P27611</a> | 1 | cation (Na +)           |
| YP_002405441.1 | + | + | + | + | + | + | + | + | + | 2.A.36.3.1 | 0     | <a href="#">P32703</a> | 8 | unknown                 |
| YP_006108896.1 | - | + | + | + | - | - | - | - | - | 2.A.36.3.1 | e-160 | <a href="#">P32703</a> | 3 | unknown                 |
| YP_002402372.1 | + | + | + | + | + | + | + | + | + | 2.A.36.6.3 | e-155 | <a href="#">Q87KV8</a> | 8 | cation                  |
| YP_002401186.1 | + | + | + | + | + | + | + | + | + | 2.A.37.1.1 | 0     | <a href="#">P03819</a> | 8 | cation                  |
| YP_002401185.1 | + | + | + | + | + | + | + | + | + | 2.A.37.1.1 | e-108 | <a href="#">P0A754</a> | 8 | cation                  |
| YP_002412502.1 | - | - | - | - | - | + | - | - | - | 2.A.37.1.1 | e-28  | <a href="#">P0A754</a> | 1 | cation                  |
| YP_002404697.1 | + | + | + | + | + | + | - | + | + | 2.A.37.1.2 | 0     | <a href="#">P45522</a> | 7 | cation                  |
| YP_002404698.1 | + | + | + | + | + | + | + | + | + | 2.A.37.1.2 | e-108 | <a href="#">P0A756</a> | 8 | cation                  |

1  
2  
3  
4  
5  
6  
7  
8  
9  
10  
11  
12  
13  
14  
15  
16  
17  
18  
19  
20  
21  
22  
23  
24  
25  
26  
27  
28  
29  
30  
31  
32  
33  
34  
35  
36  
37  
38  
39  
40  
41  
42  
43  
44  
45  
46  
47  
48  
49

|                |   |   |   |   |   |   |   |   |   |                    |       |                        |   |                       |
|----------------|---|---|---|---|---|---|---|---|---|--------------------|-------|------------------------|---|-----------------------|
| YP_002401607.1 | + | + | + | + | + | + | + | + | + | <b>2.A.37.1.5</b>  | 0     | <a href="#">P39830</a> | 8 | unknown               |
| YP_002404649.1 | + | + | + | + | + | + | + | + | + | <b>2.A.38.1.1</b>  | 0     | <a href="#">P0AGI8</a> | 8 | cation                |
| YP_002405235.1 | + | + | + | + | + | + | + | + | + | <b>2.A.38.1.1</b>  | 0     | <a href="#">P0AFZ7</a> | 8 | cation                |
| YP_852529.1    | - | - | + | - | - | - | - | + |   | <b>2.A.38.1.6</b>  | 0     | <a href="#">P23849</a> | 2 | cation                |
| NP_755569.1    | - | - | - | + | - | - | - | - |   | <b>2.A.38.4.5</b>  | e-10  | <a href="#">P73948</a> | 1 | cation                |
| YP_002401467.1 | + | + | + | + | + | + | + | + |   | <b>2.A.39.1.1</b>  | 0     | <a href="#">P0AA82</a> | 8 | nucleobase            |
| YP_006108271.1 | - | + | + | + | - | - | - | - |   | <b>2.A.39.1.1</b>  | e-26  | <a href="#">P0AA82</a> | 3 | nucleobase            |
| YP_002401641.1 | + | + | + | + | + | + | + | + |   | <b>2.A.39.3.8</b>  | 0     | <a href="#">P75712</a> | 8 | nucleobase derivative |
| YP_002401836.1 | + | + | + | + | + | + | + | + |   | <b>2.A.4.1.4</b>   | e-153 | <a href="#">P75757</a> | 8 | cation                |
| YP_002405296.1 | + | + | + | + | + | + | + | + |   | <b>2.A.4.7.1</b>   | e-160 | <a href="#">P69380</a> | 8 | cation                |
| YP_002403791.1 | + | + | + | + | + | + | + | + |   | <b>2.A.40.1.1</b>  | 0     | <a href="#">P0AGM7</a> | 8 | nucleobase            |
| YP_002402209.1 | + | + | + | + | + | + | + | + |   | <b>2.A.40.1.3</b>  | 0     | <a href="#">P75892</a> | 8 | putative nucleobase   |
| YP_852115.1    | - | - | + | - | - | - | - | + |   | <b>2.A.40.1.3</b>  | e-96  | <a href="#">P75892</a> | 2 | putative nucleobase   |
| YP_002404150.1 | + | + | + | + | + | + | + | + |   | <b>2.A.40.3.3</b>  | 0     | <a href="#">Q46821</a> | 8 | putative nucleobase   |
| YP_002405042.1 | + | + | + | + | + | + | + | + |   | <b>2.A.40.4.2</b>  | 0     | <a href="#">P0AGM9</a> | 8 | putative nucleobase   |
| YP_002404145.1 | + | + | + | + | + | + | + | + |   | <b>2.A.40.4.3</b>  | 0     | <a href="#">P67444</a> | 8 | putative nucleobase   |
| YP_002401643.1 | + | + | + | + | + | + | + | + |   | <b>2.A.40.4.4</b>  | 0     | <a href="#">P77328</a> | 8 | putative nucleobase   |
| YP_002405053.1 | + | + | + | + | + | + | - | + |   | <b>2.A.40.7.4</b>  | 0     | <a href="#">P31440</a> | 7 | unknown               |
| YP_002405440.1 | + | + | + | + | + | + | + | + |   | <b>2.A.40.7.5</b>  | 0     | <a href="#">P0AF52</a> | 8 | unknown               |
| YP_002404147.1 | + | + | + | + | + | + | + | + |   | <b>2.A.40.7.5</b>  | e-171 | <a href="#">P0AF52</a> | 8 | unknown               |
| YP_002405104.1 | + | + | + | + | + | + | + | + |   | <b>2.A.40.7.6</b>  | 0     | <a href="#">P31466</a> | 8 | putative nucleobase   |
| YP_002403702.1 | + | + | + | + | + | + | + | + |   | <b>2.A.41.1.1</b>  | 0     | <a href="#">P0AFF2</a> | 8 | nucleoside            |
| YP_002403442.1 | + | - | - | - | + | + | + | + |   | <b>2.A.41.2.10</b> | 0     | <a href="#">P33021</a> | 5 | nucleoside            |
| YP_002403445.1 | + | + | + | + | + | + | + | + |   | <b>2.A.41.2.9</b>  | 0     | <a href="#">P33024</a> | 8 | putative nucleoside   |
| YP_002403138.1 | + | + | + | + | + | + | + | + |   | <b>2.A.42.1.1</b>  | 0     | <a href="#">P0AAD4</a> | 8 | amino acid            |
| YP_002404535.1 | + | + | + | + | + | + | + | + |   | <b>2.A.42.1.2</b>  | 0     | <a href="#">P0AAD2</a> | 8 | amino acid            |
| YP_002405099.1 | + | + | + | + | + | + | + | + |   | <b>2.A.42.1.3</b>  | 0     | <a href="#">P23173</a> | 8 | amino acid            |
| YP_002404062.1 | + | + | + | + | + | + | + | + |   | <b>2.A.42.2.1</b>  | 0     | <a href="#">P0AAD6</a> | 8 | amino acid            |
| YP_002404489.1 | + | + | + | + | + | + | + | + |   | <b>2.A.42.2.2</b>  | 0     | <a href="#">P0AAD8</a> | 8 | amino acid            |



1  
2  
3  
4  
5  
6  
7  
8  
9  
10  
11  
12  
13  
14  
15  
16  
17  
18  
19  
20  
21  
22  
23  
24  
25  
26  
27  
28  
29  
30  
31  
32  
33  
34  
35  
36  
37  
38  
39  
40  
41  
42  
43  
44  
45  
46  
47  
48  
49

|                |   |   |   |   |   |   |   |   |            |       |                        |   |                 |
|----------------|---|---|---|---|---|---|---|---|------------|-------|------------------------|---|-----------------|
| YP_002404918.1 | + | + | + | + | + | + | + | + | 2.A.42.2.3 | 0     | <a href="#">P37660</a> | 8 | unknown         |
| YP_002404484.1 | + | + | + | - | + | + | + | + | 2.A.42.2.4 | 0     | <a href="#">P42628</a> | 7 | unknown         |
| YP_002404108.1 | + | + | + | + | + | + | + | + | 2.A.42.2.5 | 0     | <a href="#">P63340</a> | 8 | unknown         |
| YP_002402044.1 | + | + | + | + | + | + | + | + | 1.A.16.1.1 | e-157 | <a href="#">P0AC23</a> | 8 | monocarboxylate |
| YP_002403786.1 | + | - | - | - | + | + | + | + | 1.A.16.1.2 | e-129 | <a href="#">P77733</a> | 5 | anion           |
| YP_002404715.1 | + | + | + | + | + | + | + | + | 1.A.16.1.3 | e-147 | <a href="#">P0AC26</a> | 8 | anion           |
| YP_002403614.1 | + | + | + | + | + | + | + | + | 1.A.16.4.1 | e-149 | <a href="#">P37327</a> | 8 | unknown         |
| YP_002401958.1 | + | + | + | + | + | + | + | + | 2.A.45.3.2 | 0     | <a href="#">P75788</a> | 8 | unknown         |
| YP_002402642.1 | + | + | + | + | + | + | - | + | 2.A.46.1.1 | e-69  | <a href="#">P07775</a> | 7 | monocarboxylate |
| YP_002401855.1 | + | + | + | + | + | + | + | + | 2.A.47.3.1 | e-83  | <a href="#">Q41364</a> | 8 | anion           |
| YP_002401720.1 | + | + | + | + | + | + | + | + | 2.A.47.3.2 | 0     | <a href="#">P0AE74</a> | 8 | anion           |
| YP_006108517.1 | - | + | + | + | - | - | - | - | 2.A.47.3.2 | e-21  | <a href="#">P0AE74</a> | 3 | anion           |
| YP_002404435.1 | + | + | + | + | + | + | + | + | 2.A.47.3.3 | 0     | <a href="#">P39414</a> | 8 | anion           |
| YP_002403558.1 | + | + | + | + | + | + | + | + | 2.A.47.4.1 | e-52  | <a href="#">P72958</a> | 8 | anion           |
| YP_006104839.1 | - | + | + | + | - | - | - | - | 2.A.47.4.2 | e-11  | <a href="#">Q9HMC9</a> | 3 | anion           |
| YP_002401288.1 | + | + | + | + | + | + | + | + | 2.A.49.5.1 | 0     | <a href="#">P37019</a> | 8 | anion           |
| YP_002402821.1 | + | + | - | + | + | + | + | + | 2.A.49.5.3 | 0     | <a href="#">Q8FHC1</a> | 7 | anion           |
| YP_852691.1    | - | - | + | - | - | - | - | - | 2.A.49.5.3 | e-177 | <a href="#">Q8FHC1</a> | 1 | anion           |
| YP_002403699.1 | + | + | + | + | + | + | + | + | 2.A.49.7.1 | e-175 | <a href="#">H5KWQ5</a> | 8 | anion           |
| YP_002404412.1 | + | + | + | + | + | + | + | + | 2.A.5.5.1  | e-123 | <a href="#">P0A8H3</a> | 8 | cation          |
| YP_002415410.1 | - | - | - | - | - | + | - | - | 2.A.51.1.2 | e-26  | <a href="#">Q55027</a> | 1 | anion           |
| YP_002271388.1 | - | - | - | - | - | - | + | - | 2.A.52.2.1 | e-135 | <a href="#">P76425</a> | 1 | cation          |
| YP_002403391.1 | + | + | + | + | - | + | - | + | 2.A.52.2.1 | e-136 | <a href="#">P76425</a> | 6 | cation          |
| YP_002403392.1 | + | + | + | + | + | + | + | + | 2.A.52.2.1 | e-56  | <a href="#">P64534</a> | 8 | cation          |
| YP_002401470.1 | + | - | - | - | + | + | + | + | 2.A.53.3.8 | e-19  | <a href="#">Q8F8H7</a> | 5 | putative anion  |
| YP_002401259.1 | + | + | + | + | + | + | + | + | 2.A.53.3.8 | e-43  | <a href="#">Q8F8H7</a> | 8 | putative anion  |
| YP_002402387.1 | + | + | + | + | + | + | + | + | 2.A.53.3.9 | e-171 | <a href="#">A1JRS3</a> | 8 | putative anion  |
| YP_002403701.1 | + | + | + | + | + | + | + | + | 2.A.55.3.1 | 0     | <a href="#">P0A769</a> | 8 | anion           |
| YP_002404963.1 | + | + | + | + | + | + | - | + | 2.A.56.1.2 | 0     | <a href="#">P37676</a> | 7 | monocarboxylate |
| YP_002404962.1 | + | - | - | - | + | + | - | + | 2.A.56.1.2 | e-167 | <a href="#">P37675</a> | 4 | monocarboxylate |

1  
2  
3  
4  
5  
6  
7  
8  
9  
10  
11  
12  
13  
14  
15  
16  
17  
18  
19  
20  
21  
22  
23  
24  
25  
26  
27  
28  
29  
30  
31  
32  
33  
34  
35  
36  
37  
38  
39  
40  
41  
42  
43  
44  
45  
46  
47  
48  
49

|                |   |   |   |   |   |   |   |   |                |       |                        |   |                                         |
|----------------|---|---|---|---|---|---|---|---|----------------|-------|------------------------|---|-----------------------------------------|
| YP_006107990.1 | - | + | + | + | - | - | - | - | 2.A.56.1.2     | e-178 | <a href="#">P37675</a> | 3 | monocarboxylate                         |
| YP_006107989.1 | - | + | - | + | - | - | - | - | 2.A.56.1.2     | e-42  | <a href="#">P37674</a> | 2 | monocarboxylate                         |
| YP_002404961.1 | + | - | - | - | + | + | - | + | 2.A.56.1.2     | e-86  | <a href="#">P37674</a> | 4 | monocarboxylate                         |
| YP_001465705.1 | - | - | - | - | + | - | - | - | 2.A.56.1.5     | e-107 | <a href="#">Q8ZKS0</a> | 1 | polysaccharide<br>(rhamnogalacturonide) |
| YP_002413992.1 | - | - | - | - | - | + | - | - | 2.A.56.1.5     | e-110 | <a href="#">Q8ZKS0</a> | 1 | rhamnogalacturonide                     |
| YP_002413991.1 | - | - | - | - | - | + | - | - | 2.A.56.1.5     | e-17  | <a href="#">Q8ZKR9</a> | 1 | rhamnogalacturonide                     |
| YP_006107419.1 | - | + | + | + | - | - | - | - | 2.A.56.1.5     | e-20  | <a href="#">Q8ZKR9</a> | 3 | rhamnogalacturonide                     |
| YP_002413990.1 | - | - | - | - | - | + | - | - | 2.A.56.1.5     | e-57  | <a href="#">P43020</a> | 1 | rhamnogalacturonide                     |
| YP_006107418.1 | - | + | + | + | - | - | - | - | 2.A.56.1.5     | e-58  | <a href="#">P43020</a> | 3 | rhamnogalacturonide                     |
| YP_001465704.1 | - | - | - | - | + | - | - | - | 2.A.56.1.5     | e-63  | <a href="#">P43020</a> | 1 | rhamnogalacturonide                     |
| YP_006107420.1 | - | + | + | + | - | - | - | - | 2.A.56.1.5     | e-97  | <a href="#">Q8ZKS0</a> | 3 | rhamnogalacturonide                     |
| YP_006108895.1 | - | + | + | + | - | - | - | - | 2.A.56.1.6     | e-38  | <a href="#">Q9KR64</a> | 3 | monocarboxylate                         |
| YP_006108893.1 | - | + | + | + | - | - | - | - | 2.A.56.1.6     | e-59  | <a href="#">B9TSM9</a> | 3 | monocarboxylate                         |
| YP_002405389.1 | + | + | + | + | + | + | + | + | 2.A.58.2.1     | 0     | <a href="#">P0AF43</a> | 8 | anion                                   |
| YP_002404848.1 | + | - | - | - | - | - | - | - | 2.A.6.1.3      | 0     | <a href="#">Q9ZHC9</a> | 1 | cation                                  |
| YP_002401681.1 | + | + | + | + | + | + | + | + | 2.A.6.1.4      | 0     | <a href="#">P77239</a> | 8 | cation                                  |
| YP_002401682.1 | + | + | + | + | + | + | + | + | 2.A.6.1.4      | 0     | <a href="#">P38054</a> | 8 | cation                                  |
| YP_002404849.1 | + | - | - | - | - | - | - | - | 2.A.6.1.4      | e-154 | <a href="#">P77239</a> | 1 | cation                                  |
| YP_002404850.1 | + | - | - | - | - | - | - | - | 2.A.6.1.4      | e-22  | <a href="#">P77214</a> | 1 | cation                                  |
| YP_002401680.1 | + | + | + | + | + | + | + | + | 2.A.6.1.4      | e-58  | <a href="#">P77214</a> | 8 | cation                                  |
| YP_002404890.1 | + | + | + | + | + | + | + | + | 2.A.6.2 family | 0     | <a href="#">P37637</a> | 8 | multidrug                               |
| YP_002404632.1 | + | + | + | + | + | + | - | + | 2.A.6.2 family |       |                        | 7 | multidrug                               |
| YP_006105661.1 | - | + | + | + | - | - | - | - | 2.A.6.2 family |       |                        | 3 | multidrug                               |
| YP_002403364.1 | + | + | + | + | + | + | + | + | 2.A.6.2.12     | 0     | <a href="#">P76398</a> | 8 | multidrug                               |
| YP_002403365.1 | + | + | + | + | + | + | + | + | 2.A.6.2.14     | 0     | <a href="#">P76399</a> | 8 | multidrug                               |
| YP_006105662.1 | - | + | + | + | - | - | + | - | 2.A.6.2.19     | 0     | <a href="#">Q8GC82</a> | 4 | multidrug                               |
| YP_006105660.1 | - | + | + | + | - | - | + | - | 2.A.6.2.19     | e-157 | <a href="#">Q8GC84</a> | 4 | multidrug                               |

1  
2  
3  
4  
5  
6  
7  
8  
9  
10  
11  
12  
13  
14  
15  
16  
17  
18  
19  
20  
21  
22  
23  
24  
25  
26  
27  
28  
29  
30  
31  
32  
33  
34  
35  
36  
37  
38  
39  
40  
41  
42  
43  
44  
45  
46  
47  
48  
49

|                |   |   |   |   |   |   |   |   |                           |       |                        |   |                      |
|----------------|---|---|---|---|---|---|---|---|---------------------------|-------|------------------------|---|----------------------|
| YP_002401591.1 | + | + | + | + | + | + | + | + | <a href="#">2.A.6.2.2</a> | 0     | <a href="#">P31224</a> | 8 | multidrug            |
| YP_002404101.1 | + | + | + | + | + | + | + | + | <b>2.A.6.2.28</b>         | e-10  | <a href="#">A4KT88</a> | 8 | multidrug            |
| YP_859756.1    | - | - | + | + | - | - | - | - | <b>2.A.6.2.6</b>          | e-138 | <a href="#">P52002</a> | 2 | multidrug            |
| YP_002403763.1 | + | + | + | + | + | + | + | + | <b>2.A.6.2.7</b>          | 0     | <a href="#">P24177</a> | 8 | multidrug            |
| YP_006106806.1 | - | + | - | - | - | - | - | + | <b>2.A.6.2.7</b>          | e-27  | <a href="#">P24177</a> | 2 | multidrug            |
| YP_002401536.1 | + | + | + | + | + | + | + | + | <b>2.A.6.4.1</b>          | 0     | <a href="#">P0AG90</a> | 8 | protein              |
| YP_002401537.1 | + | + | + | + | + | + | + | + | <b>2.A.6.4.3</b>          | e-47  | <a href="#">Q5SKE6</a> | 8 | protein              |
| YP_006105180.1 | - | + | - | + | - | + | + | - | <b>2.A.6.8.1</b>          | e-10  | <a href="#">Q9EY29</a> | 4 | pigments             |
| YP_002401729.1 | + | + | + | + | + | + | + | + | <b>2.A.61.1.1</b>         | 0     | <a href="#">P0ABP3</a> | 8 | dicarboxylate        |
| YP_002404593.1 | + | - | - | - | + | + | - | + | <b>2.A.61.1.2</b>         | 0     | <a href="#">P45428</a> | 4 | dicarboxylate        |
| YP_002401734.1 | + | + | - | + | + | + | + | + | <b>2.A.64.1.1</b>         | e-12  | <a href="#">P0A843</a> | 7 | amino acid           |
| YP_002405226.1 | + | + | + | + | + | + | + | + | <b>2.A.64.1.1</b>         | e-129 | <a href="#">P69423</a> | 8 | amino acid           |
| YP_002405224.1 | + | + | + | + | + | + | + | + | <b>2.A.64.1.1</b>         | e-39  | <a href="#">P69428</a> | 8 | amino acid           |
| YP_002405225.1 | + | + | + | + | + | + | + | + | <b>2.A.64.1.1</b>         | e-84  | <a href="#">P69425</a> | 8 | amino acid           |
| YP_002403263.1 | + | + | - | + | + | + | + | + | <b>2.A.66.1.23</b>        | 0     | <a href="#">P76352</a> | 7 | multidrug            |
| YP_853088.1    | - | - | + | - | - | - | - | - | <b>2.A.66.1.23</b>        | 0     | <a href="#">P76352</a> | 1 | multidrug            |
| YP_006106319.1 | - | + | - | + | - | - | - | - | <b>2.A.66.1.26</b>        | e-44  | <a href="#">Q58119</a> | 2 | unknown              |
| YP_002402893.1 | + | + | + | + | + | + | + | + | <b>2.A.66.1.3</b>         | 0     | <a href="#">P37340</a> | 8 | multidrug            |
| YP_002405419.1 | + | + | + | + | + | + | + | + | <b>2.A.66.1.4</b>         | 0     | <a href="#">P28303</a> | 8 | unknown              |
| NP_754454.1    | - | - | - | + | - | - | - | - | <b>2.A.66.2.10</b>        | e-26  | <a href="#">Q26447</a> | 1 | polysaccharide       |
| YP_853146.1    | - | - | + | - | - | - | - | - | <b>2.A.66.2.10</b>        | e-41  | <a href="#">Q26447</a> | 1 | polysaccharide       |
| YP_002413088.1 | - | - | - | - | - | + | - | - | <b>2.A.66.2.12</b>        | 0     | <a href="#">Q1L811</a> | 1 | polysaccharide       |
| YP_002405177.1 | + | + | + | + | + | + | + | + | <b>2.A.66.2.3</b>         | 0     | <a href="#">P0AAA7</a> | 8 | polysaccharide       |
| YP_006106415.1 | - | + | - | - | - | - | - | - | <b>2.A.66.2.4</b>         | e-29  | <a href="#">Q44575</a> | 1 | polysaccharide       |
| YP_002403336.1 | + | + | + | + | + | + | + | + | <b>2.A.66.2.7</b>         | 0     | <a href="#">P77377</a> | 8 | polysaccharide (LPS) |
| YP_002402270.1 | + | + | + | + | + | + | + | + | <b>2.A.66.4.3</b>         | 0     | <a href="#">P0AF16</a> | 8 | unknown              |

1  
2  
3  
4  
5  
6  
7  
8  
9  
10  
11  
12  
13  
14  
15  
16  
17  
18  
19  
20  
21  
22  
23  
24  
25  
26  
27  
28  
29  
30  
31  
32  
33  
34  
35  
36  
37  
38  
39  
40  
41  
42  
43  
44  
45  
46  
47  
48  
49

|                |   |   |   |   |   |   |   |   |            |       |                        |   |                        |
|----------------|---|---|---|---|---|---|---|---|------------|-------|------------------------|---|------------------------|
| YP_002403324.1 | + | - | - | - | - | - | - | - | 2.A.66.5.3 | e-20  | <a href="#">A0YL48</a> | 1 | polysaccharide         |
| YP_002402577.1 | + | - | - | - | + | + | + | + | 2.A.68.1.1 | 0     | <a href="#">P46133</a> | 5 | amino acid             |
| YP_002403681.1 | + | + | + | + | + | + | + | + | 2.A.69.3.5 | e-159 | <a href="#">P0AA50</a> | 8 | unknown                |
| YP_002415412.1 | - | - | - | - | - | + | - | - | 2.A.7.1.11 | e-27  | <a href="#">Q2FD83</a> | 1 | multidrug              |
| YP_002403208.1 | + | - | - | - | - | - | + | + | 2.A.7.1.3  | e-60  | <a href="#">P23895</a> | 3 | multidrug              |
| YP_002401872.1 | + | + | + | + | + | - | + | + | 2.A.7.1.3  | e-61  | <a href="#">P23895</a> | 7 | multidrug              |
| YP_002405567.1 | + | + | + | + | + | + | + | + | 2.A.7.1.4  | e-42  | <a href="#">P69937</a> | 8 | multidrug              |
| YP_002402828.1 | + | + | + | + | + | + | + | + | 2.A.7.1.9  | e-48  | <a href="#">P69210</a> | 8 | amine                  |
| YP_002402829.1 | + | + | + | + | + | - | + | + | 2.A.7.1.9  | e-63  | <a href="#">P69213</a> | 7 | amine                  |
| YP_002402678.1 | + | + | + | + | + | + | + | + | 2.A.7.17.2 | e-145 | <a href="#">P46136</a> | 8 | amino acid             |
| YP_002415472.1 | - | - | - | - | - | + | - | - | 2.A.7.19.2 | e-13  | <a href="#">Q9ZPR7</a> | 1 | nucleobase             |
| YP_002402656.1 | + | + | + | + | + | + | + | + | 2.A.7.21.2 | e-79  | <a href="#">P76111</a> | 8 | unknown                |
| YP_002403527.1 | + | + | - | + | + | + | + | + | 2.A.7.22.1 | e-46  | <a href="#">Q47377</a> | 7 | multidrug              |
| YP_002403528.1 | + | + | + | + | + | + | + | + | 2.A.7.22.1 | e-51  | <a href="#">P76474</a> | 8 | multidrug              |
| YP_002402811.1 | + | + | + | + | + | + | + | + | 2.A.7.26.1 | e-61  | <a href="#">P76169</a> | 8 | unknown                |
| YP_002405215.1 | + | + | + | + | + | + | - | + | 2.A.7.3.1  | e-71  | <a href="#">O06933</a> | 7 | monocarboxylate        |
| YP_002405048.1 | + | + | + | + | + | + | + | + | 2.A.7.3.12 | e-138 | <a href="#">P31437</a> | 8 | unknown                |
| YP_002404556.1 | + | + | + | + | + | + | + | + | 2.A.7.3.18 | e-170 | <a href="#">E1ILD8</a> | 8 | unknown                |
| YP_002405630.1 | + | + | + | + | + | + | + | + | 2.A.7.3.19 | e-176 | <a href="#">P39314</a> | 8 | amino acid             |
| YP_002402743.1 | + | + | + | + | + | + | + | + | 2.A.7.3.2  | e-154 | <a href="#">P31125</a> | 8 | amino acid             |
| YP_002403230.1 | + | + | + | + | + | + | + | + | 2.A.7.3.22 | e-131 | <a href="#">p0aa70</a> | 8 | unknown                |
| YP_002405325.1 | + | + | + | + | + | + | + | + | 2.A.7.3.26 | e-153 | <a href="#">P0ABT9</a> | 8 | unknown                |
| YP_002401954.1 | + | + | + | + | + | + | + | + | 2.A.7.3.6  | e-148 | <a href="#">P0AA67</a> | 8 | unknown                |
| YP_002405289.1 | + | + | + | + | + | + | - | + | 2.A.7.6.1  | e-172 | <a href="#">P27125</a> | 7 | sugar                  |
| YP_002405207.1 | + | + | + | + | + | + | + | + | 2.A.7.7.2  | e-168 | <a href="#">P27844</a> | 8 | putative specific drug |
| YP_002405140.1 | + | + | + | + | + | + | + | + | 2.A.72.1.1 | 0     | <a href="#">P63183</a> | 8 | cation                 |
| YP_006106596.1 | - | + | + | + | - | + | - | + | 2.A.73.1.1 | 0     | <a href="#">P76460</a> | 5 | lipid (FFA)            |
| YP_002404183.1 | + | + | + | + | + | + | + | + | 2.A.75.1.2 | e-119 | <a href="#">P11667</a> | 8 | amino acid             |
| YP_002405212.1 | + | + | + | + | + | + | + | + | 2.A.76.1.1 | e-102 | <a href="#">P0AG34</a> | 8 | amino acid             |
| YP_002405211.1 | + | + | + | + | + | + | + | + | 2.A.76.1.2 | e-100 | <a href="#">P0AG38</a> | 8 | amino acid             |

1  
2  
3  
4  
5  
6  
7  
8  
9  
10  
11  
12  
13  
14  
15  
16  
17  
18  
19  
20  
21  
22  
23  
24  
25  
26  
27  
28  
29  
30  
31  
32  
33  
34  
35  
36  
37  
38  
39  
40  
41  
42  
43  
44  
45  
46  
47  
48  
49

|                |   |   |   |   |   |   |   |   |                   |       |                        |   |                         |
|----------------|---|---|---|---|---|---|---|---|-------------------|-------|------------------------|---|-------------------------|
| YP_002401459.1 | + | + | + | + | + | - | + | + | <b>2.A.76.1.3</b> | e-116 | <a href="#">P75693</a> | 7 | amino acid              |
| YP_002403873.1 | + | + | + | + | + | + | + | + | <b>2.A.76.1.4</b> | e-109 | <a href="#">P38101</a> | 8 | amino acid derivative   |
| YP_002403027.1 | + | + | + | + | + | + | + | + | <b>2.A.76.1.5</b> | e-116 | <a href="#">P76249</a> | 8 | amino acid              |
| YP_002403945.1 | + | + | + | + | + | + | + | + | <b>2.A.78.1.3</b> | e-129 | <a href="#">P76630</a> | 8 | amino acid              |
| YP_002403946.1 | + | + | + | + | + | + | + | + | <b>2.A.78.1.3</b> | e-52  | <a href="#">P43667</a> | 8 | amino acid              |
| YP_002405869.1 | + | + | + | + | + | + | + | + | <b>2.A.79.2.1</b> | e-144 | <a href="#">Q8FA71</a> | 8 | unknown                 |
| YP_002415475.1 | - | - | - | - | - | + | - | + | <b>2.A.8.1.1</b>  | e-107 | <a href="#">P12012</a> | 2 | monocarboxylate         |
| YP_002405680.1 | + | + | + | + | - | + | - | + | <b>2.A.8.1.2</b>  | 0     | <a href="#">P39344</a> | 6 | monocarboxylate         |
| YP_002405830.1 | + | + | - | + | + | + | + | + | <b>2.A.8.1.3</b>  | 0     | <a href="#">P0AC94</a> | 7 | monocarboxylate         |
| YP_002404765.1 | + | + | + | + | + | + | + | + | <b>2.A.8.1.4</b>  | 0     | <a href="#">P39835</a> | 8 | monocarboxylate         |
| YP_006106719.1 | - | + | + | + | + | - | + | + | <b>2.A.8.1.5</b>  | 0     | <a href="#">P08555</a> | 6 | amino acid              |
| YP_002404001.1 | + | + | + | + | + | - | - | + | <b>2.A.8.1.7</b>  | 0     | <a href="#">Q46892</a> | 6 | unknown                 |
| YP_002404787.1 | + | + | + | + | + | + | + | + | <b>2.A.8.1.8</b>  | 0     | <a href="#">P0AC96</a> | 8 | monocarboxylate         |
| YP_006108282.1 | - | + | + | + | - | - | - | - | <b>2.A.80.1.1</b> | e-21  | <a href="#">Q9FA46</a> | 3 | tri carboxylate         |
| YP_006108280.1 | - | + | + | + | - | - | - | - | <b>2.A.80.1.1</b> | e-72  | <a href="#">Q9FA44</a> | 3 | tri carboxylate         |
| YP_002401988.1 | + | + | + | + | + | + | + | + | <b>2.A.81.1.4</b> | 0     | <a href="#">a7zir5</a> | 8 | unknown                 |
| YP_002405074.1 | + | + | + | + | + | + | + | + | <b>2.A.81.1.5</b> | 0     | <a href="#">B7L824</a> | 8 | unknown                 |
| YP_002402102.1 | + | + | + | + | + | + | + | + | <b>2.A.85.1.1</b> | 0     | <a href="#">P75870</a> | 8 | aromatic acid           |
| YP_002404606.1 | + | + | + | + | + | + | + | + | <b>2.A.85.1.2</b> | 0     | <a href="#">P46481</a> | 8 | aromatic acid           |
| YP_002404706.1 | + | + | + | + | + | + | + | + | <b>2.A.85.1.3</b> | 0     | <a href="#">P45537</a> | 8 | unknown                 |
| YP_002402875.1 | + | + | + | + | + | + | + | + | <b>2.A.85.1.6</b> | 0     | <a href="#">Q8X638</a> | 8 | unknown                 |
| YP_002405457.1 | + | + | + | + | + | + | + | + | <b>2.A.85.6.1</b> | 0     | <a href="#">P32715</a> | 8 | multidrug               |
| YP_002403300.1 | + | + | + | + | + | + | + | + | <b>2.A.85.7.1</b> | 0     | <a href="#">P33011</a> | 8 | aromatic (furasic acid) |
| YP_002403787.1 | + | + | + | + | + | + | + | + | <b>2.A.86.1.1</b> | e-145 | <a href="#">P0AFI9</a> | 8 | unknown                 |
| YP_002404824.1 | + | + | + | + | + | + | + | + | <b>2.A.86.1.2</b> | 0     | <a href="#">P0AGM0</a> | 8 | unknown                 |
| YP_002402830.1 | + | + | + | + | + | + | + | + | <b>2.A.86.1.4</b> | e-159 | <a href="#">P0AFS5</a> | 8 | protein (AI2)           |
| YP_002403790.1 | + | + | + | + | + | + | + | + | <b>2.A.86.1.5</b> | e-06  | <a href="#">C9VRY8</a> | 8 | protein (AI2)           |
| YP_002415025.1 | - | - | - | - | - | + | - | - | <b>2.A.86.1.6</b> | e-22  | <a href="#">D3LPG3</a> | 1 | sugar                   |
| YP_001465363.1 | - | - | - | - | + | - | + | + | <b>2.A.86.1.6</b> | e-24  | <a href="#">D3LPG3</a> | 3 | sugar                   |
| YP_002402916.1 | + | + | + | + | + | + | + | + | <b>2.A.86.2.1</b> | e-169 | <a href="#">B1LE48</a> | 8 | nucleobase              |

1  
2  
3  
4  
5  
6  
7  
8  
9  
10  
11  
12  
13  
14  
15  
16  
17  
18  
19  
20  
21  
22  
23  
24  
25  
26  
27  
28  
29  
30  
31  
32  
33  
34  
35  
36  
37  
38  
39  
40  
41  
42  
43  
44  
45  
46  
47  
48  
49

|                |   |   |   |   |   |   |   |   |                   |       |                        |   |                      |
|----------------|---|---|---|---|---|---|---|---|-------------------|-------|------------------------|---|----------------------|
| YP_002404821.1 | + | + | + | + | + | + | + | + | <b>2.A.88.8.6</b> | e-125 | <a href="#">B3WJF3</a> | 8 | enzyme cofactor      |
|                |   |   |   |   |   |   |   |   | <b>2.A.9.3.1</b>  |       |                        | 8 | protein              |
| YP_002405095.1 | + | + | + | + | + | + | + | + |                   | 0     | <a href="#">P25714</a> | 8 | (cytochrome oxidase) |
| YP_002403712.1 | + | + | + | + | + | + | + | + | <b>2.A.93.1.4</b> | 0     | <a href="#">P39836</a> | 8 | putative auxin       |
| YP_002402733.1 | + | + | + | + | + | + | + | + | <b>2.A.95.1.1</b> | e-120 | <a href="#">P0AEY1</a> | 8 | unknown              |
| YP_002402423.1 | + | + | + | + | + | + | + | + | <b>2.A.95.1.4</b> | e-31  | <a href="#">Q8J305</a> | 8 | amino acid           |
| YP_002404786.1 | + | + | + | + | + | + | + | + | <b>2.A.95.1.5</b> | e-89  | <a href="#">P67143</a> | 8 | putative multidrug   |
| YP_002401153.1 | + | + | + | + | + | + | + | + | <b>2.A.96.1.1</b> | e-96  | <a href="#">P0AC98</a> | 8 | unknown              |
| YP_002403439.1 | + | + | - | + | + | + | + | + | <b>2.A.98.1.3</b> | e-160 | <a href="#">P62723</a> | 7 | unknown              |
| YP_006105480.1 | - | + | + | + | - | + | - | - | <b>2.C.1.1.1</b>  | e-13  | <a href="#">P02929</a> | 4 | nonspecific          |
| YP_002402434.1 | + | + | + | + | + | + | + | + | <b>2.C.1.1.1</b>  | e-79  | <a href="#">P02929</a> | 8 | nonspecific          |
| YP_002402785.1 | + | - | - | - | - | - | - | - | <b>2.C.1.2.1</b>  | e-08  | <a href="#">P19934</a> | 1 | unknown              |
| YP_002401833.1 | + | + | + | + | + | + | + | + | <b>2.C.1.2.1</b>  | e-108 | <a href="#">P45955</a> | 8 | unknown              |
| YP_002402786.1 | + | - | - | - | - | - | - | - | <b>2.C.1.2.1</b>  | e-24  | <a href="#">P19934</a> | 1 | unknown              |
| NP_752753.1    | - | - | - | + | - | - | - | + | <b>2.C.1.2.1</b>  | e-31  | <a href="#">P45955</a> | 2 | unknown              |
| YP_002401830.1 | + | + | + | + | + | + | + | + | <b>2.C.1.2.1</b>  | e-55  | <a href="#">P19934</a> | 8 | unknown              |
| YP_002405407.1 | + | + | + | + | + | + | + | + | <b>3.A.1.1.1</b>  | 0     | <a href="#">P02916</a> | 8 | sugar                |
| YP_002405408.1 | + | + | + | + | + | + | + | + | <b>3.A.1.1.1</b>  | 0     | <a href="#">P0AEX9</a> | 8 | sugar                |
| YP_002405409.1 | + | + | + | + | + | + | + | + | <b>3.A.1.1.1</b>  | 0     | <a href="#">P68187</a> | 8 | sugar                |
| YP_002405406.1 | + | + | + | + | + | + | + | + | <b>3.A.1.1.1</b>  | e-153 | <a href="#">P68183</a> | 8 | sugar                |
| YP_002402554.1 | + | + | + | + | + | - | + | + | <b>3.A.1.1.25</b> | e-32  | <a href="#">Q72H67</a> | 7 | sugar                |
| YP_002402560.1 | + | + | + | + | + | - | + | - | <b>3.A.1.1.26</b> | e-131 | <a href="#">P94360</a> | 6 | sugar                |
| YP_002402553.1 | + | + | + | + | + | - | - | + | <b>3.A.1.1.28</b> | e-13  | <a href="#">Q00749</a> | 6 | sugar                |
| YP_002404800.1 | + | + | + | + | + | + | + | + | <b>3.A.1.1.3</b>  | 0     | <a href="#">P10907</a> | 8 | polyol               |
| YP_002404803.1 | + | + | + | + | + | + | + | + | <b>3.A.1.1.3</b>  | 0     | <a href="#">P0AG80</a> | 8 | polyol               |
| YP_002404801.1 | + | + | + | + | + | + | + | + | <b>3.A.1.1.3</b>  | e-151 | <a href="#">P10906</a> | 8 | polyol               |
| YP_002404802.1 | + | + | + | + | + | + | + | + | <b>3.A.1.1.3</b>  | e-158 | <a href="#">P10905</a> | 8 | polyol               |
| YP_002402555.1 | + | + | + | + | + | - | + | + | <b>3.A.1.1.7</b>  | e-43  | <a href="#">O51925</a> | 7 | sugar                |
| YP_002270826.1 | - | - | - | - | - | - | + | + | <b>3.A.1.10.3</b> | e-23  | <a href="#">P44513</a> | 2 | cation (ferric)      |
| YP_002329404.1 | - | - | - | - | - | + | - | - | <b>3.A.1.10.3</b> | e-24  | <a href="#">P44513</a> | 1 | cation (ferric)      |

1  
2  
3  
4  
5  
6  
7  
8  
9  
10  
11  
12  
13  
14  
15  
16  
17  
18  
19  
20  
21  
22  
23  
24  
25  
26  
27  
28  
29  
30  
31  
32  
33  
34  
35  
36  
37  
38  
39  
40  
41  
42  
43  
44  
45  
46  
47  
48  
49

|                |   |   |   |   |   |   |   |   |             |       |                        |   |                      |
|----------------|---|---|---|---|---|---|---|---|-------------|-------|------------------------|---|----------------------|
| YP_006106081.1 | - | + | + | + | - | - | - | - | 3.A.1.10.3  | e-24  | <a href="#">P44513</a> | 3 | cation (ferric)      |
| YP_002402981.1 | + | - | - | - | + | - | - | - | 3.A.1.10.3  | e-25  | <a href="#">P44513</a> | 2 | cation (ferric)      |
| NP_755572.1    | - | - | - | + | - | - | - | - | 3.A.1.101.1 | e-102 | <a href="#">P24586</a> | 1 | polysaccharide       |
| YP_006107350.1 | - | + | - | - | - | - | - | - | 3.A.1.101.1 | e-117 | <a href="#">P24586</a> | 1 | polysaccharide       |
| YP_006107351.1 | - | + | + | + | - | + | - | - | 3.A.1.101.1 | e-137 | <a href="#">P24584</a> | 4 | polysaccharide       |
| YP_854396.1    | - | - | + | - | - | - | - | - | 3.A.1.101.1 | e-90  | <a href="#">P24586</a> | 1 | polysaccharide       |
| YP_002414096.1 | - | - | - | - | - | + | - | - | 3.A.1.101.1 | e-97  | <a href="#">P24586</a> | 1 | polysaccharide       |
| YP_002401261.1 | + | + | + | + | + | + | + | + | 3.A.1.102.1 | e-10  | <a href="#">P50333</a> | 8 | polysaccharide (LPS) |
| YP_002401260.1 | + | + | + | + | + | + | + | + | 3.A.1.105.3 | e-43  | <a href="#">Q70J75</a> | 8 | multidrug            |
| YP_002401935.1 | + | + | + | + | + | + | + | + | 3.A.1.105.4 | e-136 | <a href="#">Q4VWC9</a> | 8 | specific drug        |
| YP_002404835.1 | + | + | + | + | - | + | + | + | 3.A.1.105.4 | e-18  | <a href="#">Q4VWD0</a> | 7 | specific drug        |
| YP_002404833.1 | + | + | + | + | + | + | + | + | 3.A.1.105.4 | e-22  | <a href="#">Q4VWC7</a> | 8 | specific drug        |
| YP_002401936.1 | + | + | + | + | + | + | + | + | 3.A.1.105.4 | e-46  | <a href="#">Q4VWD0</a> | 8 | specific drug        |
| YP_002404834.1 | + | + | + | + | + | + | + | + | 3.A.1.105.4 | e-55  | <a href="#">Q4VWC9</a> | 8 | specific drug        |
| YP_002401934.1 | + | + | + | + | + | + | + | + | 3.A.1.105.4 | e-67  | <a href="#">Q4VWC8</a> | 8 | specific drug        |
| YP_002401933.1 | + | + | + | + | + | + | + | + | 3.A.1.105.4 | e-72  | <a href="#">Q4VWC7</a> | 8 | specific drug        |
| YP_002402054.1 | + | + | + | + | + | + | + | + | 3.A.1.106.1 | 0     | <a href="#">P60752</a> | 8 | lipid                |
| YP_002401578.1 | + | + | + | + | + | + | + | + | 3.A.1.106.5 | 0     | <a href="#">A7VN01</a> | 8 | multidrug            |
| YP_002401579.1 | + | + | + | + | + | + | + | + | 3.A.1.106.5 | 0     | <a href="#">A7VN02</a> | 8 | multidrug            |
| YP_006105307.1 | - | + | - | + | - | - | - | - | 3.A.1.106.7 | 0     | <a href="#">Q8RMB7</a> | 2 | siderophore          |
| YP_002403477.1 | + | + | - | + | + | + | + | + | 3.A.1.107.3 | e-12  | <a href="#">P0ABM7</a> | 7 | siderophore          |
| YP_002403479.1 | + | + | + | + | + | + | + | + | 3.A.1.107.3 | e-70  | <a href="#">P0ABM0</a> | 8 | siderophore          |
| YP_002403480.1 | + | + | + | + | + | + | + | + | 3.A.1.107.3 | e-99  | <a href="#">Q8XE58</a> | 8 | siderophore          |
| YP_006108794.1 | - | + | - | + | - | - | - | - | 3.A.1.109.1 | 0     | <a href="#">P08716</a> | 2 | protein              |

1  
2  
3  
4  
5  
6  
7  
8  
9  
10  
11  
12  
13  
14  
15  
16  
17  
18  
19  
20  
21  
22  
23  
24  
25  
26  
27  
28  
29  
30  
31  
32  
33  
34  
35  
36  
37  
38  
39  
40  
41  
42  
43  
44  
45  
46  
47  
48  
49

|    |                |   |   |   |   |   |   |   |             |       |                        |   |                    |
|----|----------------|---|---|---|---|---|---|---|-------------|-------|------------------------|---|--------------------|
| 4  | YP_006104453.1 | - | + | - | + | - | - | - | 3.A.1.109.3 | e-119 | <a href="#">Q88RG3</a> | 2 | protein            |
| 5  | YP_006104452.1 | - | + | - | + | - | - | - | 3.A.1.109.4 | e-09  | <a href="#">Q9I2M2</a> | 2 | putative protein   |
| 7  | YP_002411291.1 | - | - | - | - | - | + | + | 3.A.1.109.4 | e-115 | <a href="#">Q9I2M1</a> | 2 | putative protein   |
| 9  | YP_006104454.1 | - | + | - | + | - | - | - | 3.A.1.109.4 | e-65  | <a href="#">Q9I2M0</a> | 2 | putative protein   |
| 11 | YP_002411292.1 | - | - | - | - | - | + | + | 3.A.1.109.4 | e-73  | <a href="#">Q9I2M0</a> | 2 | putative protein   |
| 13 | YP_002402323.1 | + | + | + | + | + | + | + | 3.A.1.11.1  | 0     | <a href="#">P0AFK9</a> | 8 | amine              |
| 14 | YP_002402326.1 | + | + | + | + | + | + | + | 3.A.1.11.1  | 0     | <a href="#">P69874</a> | 8 | amine              |
| 15 | YP_002402324.1 | + | + | + | + | + | + | + | 3.A.1.11.1  | e-135 | <a href="#">P0AFK6</a> | 8 | amine              |
| 16 | YP_002402651.1 | + | + | + | + | + | + | + | 3.A.1.11.1  | e-14  | <a href="#">P0AFK6</a> | 8 | amine              |
| 18 | YP_002402325.1 | + | + | + | + | + | + | + | 3.A.1.11.1  | e-155 | <a href="#">P0AFK4</a> | 8 | amine              |
| 19 | YP_002402649.1 | + | + | + | + | + | + | + | 3.A.1.11.1  | e-55  | <a href="#">P69874</a> | 8 | amine              |
| 21 | YP_002401995.1 | + | + | + | + | + | + | + | 3.A.1.11.2  | 0     | <a href="#">P31133</a> | 8 | amine              |
| 22 | YP_002401996.1 | + | + | + | + | + | + | + | 3.A.1.11.2  | 0     | <a href="#">P31134</a> | 8 | amine              |
| 23 | YP_002401998.1 | + | + | + | + | + | + | + | 3.A.1.11.2  | e-133 | <a href="#">P0AFL1</a> | 8 | amine              |
| 24 | YP_002401997.1 | + | + | + | + | + | + | + | 3.A.1.11.2  | e-159 | <a href="#">P31135</a> | 8 | amine              |
| 25 | YP_002402648.1 | + | + | + | + | + | + | + | 3.A.1.11.2  | e-16  | <a href="#">P31133</a> | 8 | amine              |
| 26 | YP_002402650.1 | + | + | + | + | + | + | + | 3.A.1.11.2  | e-31  | <a href="#">P31135</a> | 8 | amine              |
| 28 | YP_006105216.1 | - | + | - | + | - | - | - | 3.A.1.110.1 | 0     | <a href="#">Q93GK4</a> | 2 | protein            |
| 29 | YP_006105217.1 | - | + | - | + | - | - | - | 3.A.1.110.1 | 0     | <a href="#">Q93GK5</a> | 2 | protein            |
| 30 | NP_752270.1    | - | - | - | + | - | - | - | 3.A.1.110.1 | e-49  | <a href="#">Q93GK6</a> | 1 | protein            |
| 31 | YP_006105219.1 | - | + | - | + | - | - | - | 3.A.1.110.1 | e-50  | <a href="#">Q93GK6</a> | 2 | protein            |
| 32 | YP_002403491.1 | + | + | + | + | + | + | + | 3.A.1.113.3 | 0     | <a href="#">P33941</a> | 8 | protein            |
| 33 | YP_002403941.1 | + | + | + | + | + | + | + | 3.A.1.12.1  | 0     | <a href="#">P14175</a> | 8 | amine              |
| 34 | YP_002403943.1 | + | + | + | + | + | + | + | 3.A.1.12.1  | 0     | <a href="#">P0AFM2</a> | 8 | amine              |
| 35 | YP_002403942.1 | + | + | + | + | + | + | + | 3.A.1.12.1  | e-169 | <a href="#">P14176</a> | 8 | amine              |
| 36 | YP_002403410.1 | + | + | + | + | + | + | + | 3.A.1.12.10 | e-31  | <a href="#">Q87WH3</a> | 8 | amine              |
| 37 | YP_002403408.1 | + | + | + | + | + | + | + | 3.A.1.12.4  | e-70  | <a href="#">Q34992</a> | 8 | amine              |
| 38 | YP_002403409.1 | + | + | + | + | + | + | + | 3.A.1.12.8  | e-13  | <a href="#">Q93A34</a> | 8 | amine / amino acid |
| 39 | YP_002403407.1 | + | + | + | + | + | + | + | 3.A.1.12.8  | e-28  | <a href="#">Q93A34</a> | 8 | amine / amino acid |



1  
2  
3  
4  
5  
6  
7  
8  
9  
10  
11  
12  
13  
14  
15  
16  
17  
18  
19  
20  
21  
22  
23  
24  
25  
26  
27  
28  
29  
30  
31  
32  
33  
34  
35  
36  
37  
38  
39  
40  
41  
42  
43  
44  
45  
46  
47  
48  
49

|                |   |   |   |   |   |   |   |   |             |       |                        |   |                       |
|----------------|---|---|---|---|---|---|---|---|-------------|-------|------------------------|---|-----------------------|
| YP_002402091.1 | + | + | + | + | + | + | + | + | 3.A.1.120.6 | 0     | <a href="#">P43672</a> | 8 | unknown               |
| YP_002405894.1 | + | + | + | + | + | + | + | + | 3.A.1.120.6 | e-74  | <a href="#">P43672</a> | 8 | unknown               |
| YP_002401960.1 | + | + | + | + | + | + | + | + | 3.A.1.121.4 | e-141 | <a href="#">Q83XH1</a> | 8 | multidrug             |
| YP_002404699.1 | + | + | + | + | + | + | + | + | 3.A.1.121.4 | e-74  | <a href="#">Q83XH1</a> | 8 | multidrug             |
| YP_002402019.1 | + | + | + | + | + | + | + | + | 3.A.1.122.1 | 0     | <a href="#">P75830</a> | 8 | multidrug             |
| YP_002402020.1 | + | + | + | + | - | + | + | + | 3.A.1.122.1 | 0     | <a href="#">P75831</a> | 7 | multidrug             |
| YP_002405466.1 | + | + | + | + | + | + | + | + | 3.A.1.122.2 | e-25  | <a href="#">O31711</a> | 8 | peptide               |
| YP_002402316.1 | + | + | + | + | + | + | + | + | 3.A.1.125.1 | 0     | <a href="#">P0ADC3</a> | 8 | protein (lipoprotein) |
| YP_002402318.1 | + | + | + | + | + | + | + | + | 3.A.1.125.1 | 0     | <a href="#">P75958</a> | 8 | protein (lipoprotein) |
| YP_002269776.1 | - | - | - | - | - | - | + | - | 3.A.1.125.1 | e-09  | <a href="#">P75958</a> | 1 | protein (lipoprotein) |
| YP_002402317.1 | + | + | + | + | + | + | + | + | 3.A.1.125.1 | e-129 | <a href="#">P75957</a> | 8 | protein (lipoprotein) |
| YP_002401624.1 | + | + | + | + | + | + | + | + | 3.A.1.125.1 | e-49  | <a href="#">P75957</a> | 8 | protein (lipoprotein) |
| YP_002269774.1 | - | - | - | - | - | - | + | - | 3.A.1.125.2 | e-50  | <a href="#">O53899</a> | 1 | putative lipoprotein  |
| YP_002402026.1 | + | + | + | + | + | + | + | + | 3.A.1.129.1 | 0     | <a href="#">P23886</a> | 8 | AA/ peptide (GSH)     |
| YP_002402027.1 | + | + | + | + | + | + | + | + | 3.A.1.129.1 | 0     | <a href="#">P29018</a> | 8 | AA/ peptide (GSH)     |
| YP_002401291.1 | + | + | + | + | + | + | + | + | 3.A.1.13.1  | e-123 | <a href="#">Q8ZRP7</a> | 8 | enzyme cofactor (B12) |
| YP_002402940.1 | + | + | + | + | + | + | + | + | 3.A.1.13.1  | e-136 | <a href="#">P06609</a> | 8 | enzyme cofactor (B12) |
| YP_002402938.1 | + | + | + | + | + | + | + | + | 3.A.1.13.1  | e-140 | <a href="#">P06611</a> | 8 | enzyme cofactor (B12) |
| YP_002403398.1 | + | + | + | + | + | + | + | + | 3.A.1.132.3 | e-53  | <a href="#">A0L4L0</a> | 8 | unknown               |
| YP_002402197.1 | + | + | + | + | + | + | + | + | 3.A.1.134.7 | e-17  | <a href="#">A6QEW8</a> | 8 | peptide               |
| YP_002402331.1 | + | + | + | + | + | + | + | + | 3.A.1.134.7 | e-25  | <a href="#">A6QEW8</a> | 8 | peptide               |
| YP_002273628.1 | - | - | - | - | - | - | + | - | 3.A.1.134.7 | e-10  | <a href="#">A6QEW8</a> | 1 | peptide               |
| YP_002402837.1 | + | + | + | + | + | + | + | + | 3.A.1.134.7 | e-15  | <a href="#">A6QEW8</a> | 8 | peptide               |
| YP_002405294.1 | + | + | + | + | + | + | + | + | 3.A.1.134.7 | e-16  | <a href="#">A6QEW8</a> | 8 | peptide               |
| YP_002401787.1 | + | + | + | + | + | + | + | + | 3.A.1.134.7 | e-17  | <a href="#">A6QEW8</a> | 8 | peptide               |
| YP_002403368.1 | + | + | + | + | + | + | + | + | 3.A.1.134.7 | e-18  | <a href="#">A6QEW8</a> | 8 | peptide               |

1  
2  
3  
4  
5  
6  
7  
8  
9  
10  
11  
12  
13  
14  
15  
16  
17  
18  
19  
20  
21  
22  
23  
24  
25  
26  
27  
28  
29  
30  
31  
32  
33  
34  
35  
36  
37  
38  
39  
40  
41  
42  
43  
44  
45  
46  
47  
48  
49

|    |                |   |   |   |   |   |   |   |   |             |       |                        |   |                          |
|----|----------------|---|---|---|---|---|---|---|---|-------------|-------|------------------------|---|--------------------------|
| 4  | YP_002405482.1 | + | + | + | + | + | + | + | + | 3.A.1.134.7 | e-18  | <a href="#">A6QEW8</a> | 8 | peptide                  |
| 5  | YP_002404398.1 | + | + | + | + | + | + | + | + | 3.A.1.134.7 | e-19  | <a href="#">A6QEW8</a> | 8 | peptide                  |
| 6  | YP_002405904.1 | + | + | + | + | + | + | + | + | 3.A.1.134.7 | e-19  | <a href="#">A6QEW8</a> | 8 | peptide                  |
| 7  | YP_006108801.1 | - | + | - | + | - | - | - | - | 3.A.1.134.7 | e-19  | <a href="#">A6QEW8</a> | 2 | peptide                  |
| 8  | YP_002404839.1 | + | - | - | - | - | - | - | - | 3.A.1.134.7 | e-19  | <a href="#">A6QEW8</a> | 1 | peptide                  |
| 9  | YP_002401678.1 | + | + | + | + | + | + | + | + | 3.A.1.134.7 | e-20  | <a href="#">A6QEW8</a> | 8 | peptide                  |
| 10 | YP_002403241.1 | + | + | + | + | + | + | + | + | 3.A.1.134.7 | e-20  | <a href="#">A6QEW8</a> | 8 | peptide                  |
| 11 | YP_002404852.1 | + | - | - | - | - | - | - | - | 3.A.1.134.7 | e-20  | <a href="#">A6QEW8</a> | 1 | peptide                  |
| 12 | YP_002404755.1 | + | + | + | + | + | + | + | + | 3.A.1.134.7 | e-22  | <a href="#">A6QEW8</a> | 8 | peptide                  |
| 13 | YP_002405901.1 | + | + | + | + | + | + | + | + | 3.A.1.134.7 | e-25  | <a href="#">A6QEW8</a> | 8 | peptide                  |
| 14 | YP_002401526.1 | + | + | + | + | + | + | + | + | 3.A.1.134.7 | e-27  | <a href="#">A6QEW8</a> | 8 | peptide                  |
| 15 | YP_002401620.1 | + | + | + | - | + | + | + | + | 3.A.1.139.2 | e-131 | <a href="#">P77307</a> | 7 | cofactor substrate (GDP) |
| 16 | YP_002405808.1 | + | + | - | - | + | + | - | + | 3.A.1.14.1  | e-131 | <a href="#">P15029</a> | 5 | siderophore              |
| 17 | YP_002405806.1 | + | + | - | - | + | + | - | + | 3.A.1.14.1  | e-137 | <a href="#">P15031</a> | 5 | siderophore              |
| 18 | YP_002405809.1 | + | + | - | - | + | + | - | + | 3.A.1.14.1  | e-145 | <a href="#">P15030</a> | 5 | siderophore              |
| 19 | YP_002405810.1 | + | + | - | - | + | + | - | + | 3.A.1.14.1  | e-166 | <a href="#">P15028</a> | 5 | siderophore              |
| 20 | YP_006105556.1 | - | + | + | + | - | + | - | - | 3.A.1.14.11 | e-47  | <a href="#">Q57130</a> | 4 | siderophore              |
| 21 | YP_006107437.1 | - | + | + | + | - | - | + | - | 3.A.1.14.13 | e-28  | <a href="#">Q9RK09</a> | 4 | siderophore              |
| 22 | YP_006107916.1 | - | + | + | + | - | + | + | - | 3.A.1.14.18 | e-129 | <a href="#">Q32AY3</a> | 5 | siderophore              |
| 23 | YP_006107915.1 | - | + | + | + | - | + | + | - | 3.A.1.14.18 | e-141 | <a href="#">Q32AY2</a> | 5 | siderophore              |
| 24 | YP_006107911.1 | - | + | + | + | - | + | + | - | 3.A.1.14.18 | e-164 | <a href="#">Q32AX9</a> | 5 | siderophore              |
| 25 | YP_002401698.1 | + | + | + | + | + | + | + | + | 3.A.1.14.2  | e-128 | <a href="#">P23876</a> | 8 | siderophore              |
| 26 | YP_002401697.1 | + | + | + | + | + | + | + | + | 3.A.1.14.2  | e-142 | <a href="#">P23877</a> | 8 | siderophore              |
| 27 | YP_002401696.1 | + | + | + | + | + | + | + | + | 3.A.1.14.2  | e-149 | <a href="#">P23878</a> | 8 | siderophore              |

1  
2  
3  
4  
5  
6  
7  
8  
9  
10  
11  
12  
13  
14  
15  
16  
17  
18  
19  
20  
21  
22  
23  
24  
25  
26  
27  
28  
29  
30  
31  
32  
33  
34  
35  
36  
37  
38  
39  
40  
41  
42  
43  
44  
45  
46  
47  
48  
49

|    |                |   |   |   |   |   |   |   |   |             |       |                        |   |                       |
|----|----------------|---|---|---|---|---|---|---|---|-------------|-------|------------------------|---|-----------------------|
| 4  | YP_002401700.1 | + | + | + | + | + | + | + | + | 3.A.1.14.2  | e-163 | <a href="#">C8U2V6</a> | 8 | siderophore           |
| 5  | YP_006104403.1 | - | + | - | + | - | - | - | - | 3.A.1.14.2  | e-29  | <a href="#">P23878</a> | 2 | siderophore           |
| 6  | YP_006106366.1 | - | + | - | + | - | - | - | - | 3.A.1.14.2  | e-29  | <a href="#">P23878</a> | 2 | siderophore           |
| 7  | YP_006104402.1 | - | + | - | + | - | - | - | - | 3.A.1.14.21 | e-18  | <a href="#">O68878</a> | 2 | siderophore           |
| 8  | YP_006106367.1 | - | + | - | + | - | - | - | - | 3.A.1.14.21 | e-18  | <a href="#">O68878</a> | 2 | siderophore           |
| 9  | YP_002401286.1 | + | + | + | + | + | + | + | + | 3.A.1.14.3  | 0     | <a href="#">P06972</a> | 8 | siderophore           |
| 10 | YP_002401284.1 | + | + | + | + | + | + | + | + | 3.A.1.14.3  | e-151 | <a href="#">P07821</a> | 8 | siderophore           |
| 11 | YP_002401285.1 | + | + | + | + | + | + | + | + | 3.A.1.14.3  | e-162 | <a href="#">P07822</a> | 8 | siderophore           |
| 12 | YP_006107438.1 | - | + | + | + | - | - | + | - | 3.A.1.14.6  | e-72  | <a href="#">Q9RCF3</a> | 4 | siderophore           |
| 13 | YP_006107435.1 | - | + | + | + | - | - | + | - | 3.A.1.14.7  | e-08  | <a href="#">Q93PN3</a> | 4 | siderophore           |
| 14 | YP_006107436.1 | - | + | + | + | - | - | + | - | 3.A.1.14.8  | e-30  | <a href="#">Q8GRB1</a> | 4 | siderophore           |
| 15 | YP_006105555.1 | - | + | + | + | - | + | - | - | 3.A.1.14.8  | e-33  | <a href="#">Q8GRB0</a> | 4 | siderophore           |
| 16 | YP_002404812.1 | + | + | + | + | + | + | + | + | 3.A.1.140.1 | e-180 | <a href="#">P0AC31</a> | 8 | protein (FstX enzyme) |
| 17 | YP_002403245.1 | + | + | + | + | + | + | + | + | 3.A.1.15.3  | e-45  | <a href="#">O05703</a> | 8 | cation                |
| 18 | YP_002405434.1 | + | + | + | + | + | + | + | + | 3.A.1.15.4  | e-09  | <a href="#">Q56953</a> | 8 | cation                |
| 19 | YP_002403091.1 | + | + | + | + | + | + | + | + | 3.A.1.15.5  | e-143 | <a href="#">P0A9X1</a> | 8 | cation                |
| 20 | YP_002403092.1 | + | + | + | + | + | + | + | + | 3.A.1.15.5  | e-106 | <a href="#">P39832</a> | 8 | cation                |
| 21 | YP_002403090.1 | + | + | + | + | + | + | + | + | 3.A.1.15.5  | e-150 | <a href="#">P39172</a> | 8 | cation                |
| 22 | YP_006105507.1 | - | + | + | + | - | + | - | - | 3.A.1.15.7  | e-113 | <a href="#">Q9XCS1</a> | 4 | cation                |
| 23 | YP_006105506.1 | - | + | + | + | - | + | - | - | 3.A.1.15.7  | e-115 | <a href="#">Q9XCS0</a> | 4 | cation                |
| 24 | YP_006105508.1 | - | + | + | + | - | + | - | - | 3.A.1.15.7  | e-134 | <a href="#">Q9XCS2</a> | 4 | cation                |
| 25 | YP_006105714.1 | - | + | - | + | - | - | - | - | 3.A.1.15.7  | e-35  | <a href="#">Q9XCR9</a> | 2 | cation                |
| 26 | YP_006105505.1 | - | + | + | + | - | + | - | - | 3.A.1.15.7  | e-91  | <a href="#">Q9XCR9</a> | 4 | cation                |
| 27 | YP_002401496.1 | + | + | + | + | + | + | + | + | 3.A.1.17.1  | e-137 | <a href="#">Q47539</a> | 8 | amine                 |
| 28 | YP_002401495.1 | + | + | + | + | - | + | + | + | 3.A.1.17.1  | e-142 | <a href="#">Q47538</a> | 7 | amine                 |
| 29 | YP_002401494.1 | + | + | + | + | + | + | + | + | 3.A.1.17.1  | e-171 | <a href="#">Q47537</a> | 8 | amine                 |
| 30 | YP_002402078.1 | + | + | + | + | + | + | + | + | 3.A.1.17.2  | e-72  | <a href="#">O85763</a> | 8 | amine                 |
| 31 | YP_002402075.1 | + | + | + | + | + | + | + | + | 3.A.1.17.2  | e-84  | <a href="#">Q8KZQ6</a> | 8 | amine                 |
| 32 | YP_002402076.1 | + | + | + | + | + | + | + | + | 3.A.1.17.2  | e-98  | <a href="#">O85765</a> | 8 | amine                 |



1  
2  
3  
4  
5  
6  
7  
8  
9  
10  
11  
12  
13  
14  
15  
16  
17  
18  
19  
20  
21  
22  
23  
24  
25  
26  
27  
28  
29  
30  
31  
32  
33  
34  
35  
36  
37  
38  
39  
40  
41  
42  
43  
44  
45  
46  
47  
48  
49

|                |   |   |   |   |   |   |   |   |   |                     |       |                        |   |                     |
|----------------|---|---|---|---|---|---|---|---|---|---------------------|-------|------------------------|---|---------------------|
| YP_002403427.1 | + | + | + | + | + | + | + | + | + | <b>3.A.1.2.3</b>    | 0     | <a href="#">P0AAG8</a> | 8 | sugar               |
| YP_002403842.1 | + | + | + | + | + | + | + | + | + | <b>3.A.1.2.3</b>    | e-13  | <a href="#">P0AEE5</a> | 8 | sugar               |
| YP_002403426.1 | + | + | + | + | + | + | + | + | + | <b>3.A.1.2.3</b>    | e-153 | <a href="#">P23200</a> | 8 | sugar               |
| YP_002403428.1 | + | + | + | + | + | + | + | + | + | <b>3.A.1.2.3</b>    | e-178 | <a href="#">P0AEE5</a> | 8 | sugar               |
| YP_002403841.1 | + | + | + | + | + | + | + | + | + | <b>3.A.1.2.3</b>    | e-93  | <a href="#">P0AAG8</a> | 8 | sugar               |
| YP_002404950.1 | + | + | + | + | + | + | + | + | + | <b>3.A.1.2.4</b>    | 0     | <a href="#">P37388</a> | 8 | sugar               |
| YP_002404951.1 | + | + | + | + | + | + | + | + | + | <b>3.A.1.2.4</b>    | e-172 | <a href="#">P0AGI4</a> | 8 | sugar               |
| YP_002404949.1 | + | + | + | + | + | + | + | + | + | <b>3.A.1.2.4</b>    | e-178 | <a href="#">P37387</a> | 8 | sugar               |
| YP_006108564.1 | - | + | + | + | - | - | - | + | + | <b>3.A.1.2.6</b>    | 0     | <a href="#">P32721</a> | 4 | sugar               |
| YP_006108563.1 | - | + | + | + | - | - | - | + | + | <b>3.A.1.2.6</b>    | e-157 | <a href="#">P32720</a> | 4 | sugar               |
| YP_006108565.1 | - | + | + | + | - | - | - | + | + | <b>3.A.1.2.6</b>    | e-162 | <a href="#">P39265</a> | 4 | sugar               |
| YP_002402718.1 | + | - | - | - | + | + | + | + | + | <b>3.A.1.2.8</b>    | 0     | <a href="#">P77257</a> | 5 | unknown             |
| YP_002402720.1 | + | - | - | - | + | + | + | + | + | <b>3.A.1.2.8</b>    | e-133 | <a href="#">P0AFS1</a> | 5 | unknown             |
| YP_002402719.1 | + | - | - | - | - | + | + | + | + | <b>3.A.1.2.8</b>    | e-156 | <a href="#">P77672</a> | 4 | unknown             |
| YP_002402721.1 | + | - | - | - | + | + | + | + | + | <b>3.A.1.2.8</b>    | e-174 | <a href="#">P76142</a> | 5 | unknown             |
| YP_002401453.1 | + | - | + | - | + | + | + | - | + | <b>3.A.1.2.9</b>    | e--87 | <a href="#">Q7BSH4</a> | 5 | sugar               |
| YP_002401452.1 | + | - | + | - | + | + | + | - | + | <b>3.A.1.2.9</b>    | e-25  | <a href="#">Q7BSH5</a> | 5 | sugar               |
| YP_002269001.1 | - | - | - | - | - | - | + | - | + | <b>3.A.1.20.1</b>   | e-26  | <a href="#">Q9Z4R9</a> | 1 | siderophore         |
| YP_002269000.1 | - | - | - | - | - | - | + | - | + | <b>3.A.1.20.1</b>   | e-28  | <a href="#">Q54372</a> | 1 | siderophore         |
| YP_002268999.1 | - | - | - | - | - | - | + | - | + | <b>3.A.1.20.1</b>   | e-70  | <a href="#">Q54370</a> | 1 | siderophore         |
| YP_002402910.1 | + | + | + | + | + | + | + | + | + | <b>3.A.1.201.10</b> | e-17  | <a href="#">B0Y3B6</a> | 8 | multidrug           |
| YP_002402700.1 | + | + | + | + | + | + | + | + | + | <b>3.A.1.203.4</b>  | e-55  | <a href="#">Q50614</a> | 8 | multidrug           |
| YP_002403250.1 | + | + | + | + | - | + | - | - | + | <b>3.A.1.21.1</b>   | 0     | <a href="#">Q9Z375</a> | 5 | siderophore         |
| YP_002403251.1 | + | + | + | + | - | + | - | - | + | <b>3.A.1.21.1</b>   | 0     | <a href="#">Q9R7V3</a> | 5 | siderophore         |
| YP_002401332.1 | + | + | + | + | + | + | + | + | + | <b>3.A.1.24.1</b>   | 0     | <a href="#">P30750</a> | 8 | amino acid          |
| YP_002401330.1 | + | + | + | + | + | + | + | + | + | <b>3.A.1.24.1</b>   | e-144 | <a href="#">P28635</a> | 8 | amino acid          |
| YP_002404813.1 | + | + | + | + | + | + | + | + | + | <b>3.A.1.24.1</b>   | e-44  | <a href="#">P30750</a> | 8 | amino acid          |
| YP_002405049.1 | + | + | + | + | + | + | + | + | + | <b>3.A.1.24.1</b>   | e-78  | <a href="#">P28635</a> | 8 | amino acid          |
| YP_002401331.1 | + | + | + | + | + | + | + | + | + | <b>3.A.1.24.1</b>   | e-91  | <a href="#">P31547</a> | 8 | amino acid          |
| YP_002401844.1 | + | + | + | + | + | + | + | + | + | <b>3.A.1.26.5</b>   | e-27  | <a href="#">A7NRG0</a> | 8 | putative amino acid |

1  
2  
3  
4  
5  
6  
7  
8  
9  
10  
11  
12  
13  
14  
15  
16  
17  
18  
19  
20  
21  
22  
23  
24  
25  
26  
27  
28  
29  
30  
31  
32  
33  
34  
35  
36  
37  
38  
39  
40  
41  
42  
43  
44  
45  
46  
47  
48  
49

|                |   |   |   |   |   |   |   |   |            |       |                        |   |                       |
|----------------|---|---|---|---|---|---|---|---|------------|-------|------------------------|---|-----------------------|
| YP_002404564.1 | + | + | + | + | + | + | + | + | 3.A.1.27.3 | e-119 | <a href="#">P0ADV7</a> | 8 | nontransport          |
| YP_002404566.1 | + | + | + | + | + | + | + | + | 3.A.1.27.3 | e-143 | <a href="#">P64606</a> | 8 | lipid (phospholipid)  |
| YP_002404567.1 | + | + | + | + | + | + | + | + | 3.A.1.27.3 | e-145 | <a href="#">P63386</a> | 8 | nontransport          |
| YP_002403612.1 | + | + | + | + | + | + | + | + | 3.A.1.27.3 | e-149 | <a href="#">P76506</a> | 8 | nontransport          |
| YP_002404563.1 | + | + | - | + | + | + | + | + | 3.A.1.27.3 | e-44  | <a href="#">P64602</a> | 7 | nontransport          |
| YP_002404565.1 | + | + | + | + | + | + | + | + | 3.A.1.27.3 | e-91  | <a href="#">P64604</a> | 8 | nontransport          |
| YP_002404190.1 | + | + | + | + | + | + | + | - | 3.A.1.28.1 | e-105 | <a href="#">Q8Z3V9</a> | 7 | nucleoside derivative |
| NP_755384.1    | - | - | - | + | - | - | - | - | 3.A.1.28.1 | e-64  | <a href="#">Q8Z3V8</a> | 1 | nucleoside derivative |
| YP_002404189.1 | + | + | + | + | + | + | + | - | 3.A.1.28.1 | e-74  | <a href="#">Q8XGV9</a> | 7 | nucleoside derivative |
| YP_002404192.1 | + | + | + | + | + | + | + | - | 3.A.1.28.1 | e-80  | <a href="#">Q8Z3V7</a> | 7 | nucleoside derivative |
| YP_002404191.1 | + | + | + | - | + | + | + | - | 3.A.1.28.1 | e-88  | <a href="#">Q8Z3V8</a> | 6 | nucleoside derivative |
| YP_002403574.1 | + | + | + | + | + | + | + | + | 3.A.1.3.1  | e-105 | <a href="#">P0A2I9</a> | 8 | amino acid            |
| YP_002403573.1 | + | + | + | + | + | + | + | + | 3.A.1.3.1  | e-106 | <a href="#">P0A2I7</a> | 8 | amino acid            |
| YP_002403572.1 | + | + | + | + | + | + | + | + | 3.A.1.3.1  | e-131 | <a href="#">P02915</a> | 8 | amino acid            |
| YP_002403575.1 | + | + | + | + | + | + | + | + | 3.A.1.3.1  | e-132 | <a href="#">P02910</a> | 8 | amino acid            |
| YP_002403576.1 | + | + | + | - | + | + | + | + | 3.A.1.3.1  | e-133 | <a href="#">P09551</a> | 7 | amino acid            |
| YP_002403192.1 | + | + | + | + | + | + | + | + | 3.A.1.3.10 | e-101 | <a href="#">P0AFT2</a> | 8 | amino acid            |
| YP_002403191.1 | + | + | + | + | + | + | + | + | 3.A.1.3.10 | e-121 | <a href="#">P37774</a> | 8 | amino acid            |
| YP_002403194.1 | + | + | + | + | + | + | + | + | 3.A.1.3.10 | e-130 | <a href="#">P0AEM9</a> | 8 | amino acid            |
| YP_002401951.1 | + | + | + | + | + | + | + | + | 3.A.1.3.2  | e-103 | <a href="#">P0AEQ6</a> | 8 | amino acid            |
| YP_002401950.1 | + | + | + | + | + | + | + | + | 3.A.1.3.2  | e-124 | <a href="#">P10346</a> | 8 | amino acid            |
| YP_002401952.1 | + | + | + | + | + | + | + | + | 3.A.1.3.2  | e-140 | <a href="#">P0AEQ3</a> | 8 | amino acid            |
| YP_002402002.1 | + | + | + | + | + | + | + | + | 3.A.1.3.3  | e-110 | <a href="#">P0AE30</a> | 8 | amino acid            |
| YP_002402003.1 | + | + | + | + | + | + | + | + | 3.A.1.3.3  | e-125 | <a href="#">P0AE34</a> | 8 | amino acid            |
| YP_002402005.1 | + | + | + | + | + | + | + | + | 3.A.1.3.3  | e-127 | <a href="#">P0AAF6</a> | 8 | amino acid            |
| YP_002402001.1 | + | + | + | + | + | + | + | + | 3.A.1.3.3  | e-128 | <a href="#">P30860</a> | 8 | amino acid            |
| YP_002402004.1 | + | + | + | + | + | + | + | + | 3.A.1.3.3  | e-139 | <a href="#">P30859</a> | 8 | amino acid            |
| YP_002401760.1 | + | + | + | + | + | + | + | + | 3.A.1.3.4  | e-122 | <a href="#">P0AER5</a> | 8 | amino acid            |
| YP_002401759.1 | + | + | + | + | + | + | + | + | 3.A.1.3.4  | e-126 | <a href="#">P0AAG3</a> | 8 | amino acid            |
| YP_002401761.1 | + | + | + | + | + | + | + | + | 3.A.1.3.4  | e-140 | <a href="#">P0AER3</a> | 8 | amino acid            |

1  
2  
3  
4  
5  
6  
7  
8  
9  
10  
11  
12  
13  
14  
15  
16  
17  
18  
19  
20  
21  
22  
23  
24  
25  
26  
27  
28  
29  
30  
31  
32  
33  
34  
35  
36  
37  
38  
39  
40  
41  
42  
43  
44  
45  
46  
47  
48  
49

|                |   |   |   |   |   |   |   |   |   |                   |       |                        |   |                    |
|----------------|---|---|---|---|---|---|---|---|---|-------------------|-------|------------------------|---|--------------------|
| YP_002401762.1 | + | + | + | + | + | + | + | + | + | <b>3.A.1.3.4</b>  | e-156 | <a href="#">P37902</a> | 8 | amino acid         |
| YP_002404637.1 | + | + | + | + | + | + | + | + | + | <b>3.A.1.3.8</b>  | e-102 | <a href="#">Q52814</a> | 8 | amino acid         |
| YP_002404638.1 | + | + | + | + | + | + | + | + | + | <b>3.A.1.3.8</b>  | e-107 | <a href="#">Q52815</a> | 8 | amino acid         |
| YP_002404635.1 | + | + | + | + | + | + | + | - | + | <b>3.A.1.3.8</b>  | e-109 | <a href="#">Q52812</a> | 7 | amino acid         |
| YP_002404636.1 | + | + | + | + | + | + | + | + | + | <b>3.A.1.3.8</b>  | e-93  | <a href="#">Q52813</a> | 8 | amino acid         |
| YP_002404806.1 | + | + | + | + | + | + | + | + | + | <b>3.A.1.4.1</b>  | 0     | <a href="#">P22729</a> | 8 | amino acid         |
| YP_002404808.1 | + | + | + | + | + | + | + | + | + | <b>3.A.1.4.1</b>  | 0     | <a href="#">P04816</a> | 8 | amino acid         |
| YP_002404810.1 | + | + | + | + | + | + | + | + | + | <b>3.A.1.4.1</b>  | 0     | <a href="#">P0AD96</a> | 8 | amino acid         |
| YP_002404804.1 | + | + | + | + | + | + | + | + | + | <b>3.A.1.4.1</b>  | e-132 | <a href="#">P22731</a> | 8 | amino acid         |
| YP_002404807.1 | + | + | + | + | + | + | + | + | + | <b>3.A.1.4.1</b>  | e-143 | <a href="#">P0AEX7</a> | 8 | amino acid         |
| YP_002404805.1 | + | + | + | + | + | + | + | + | + | <b>3.A.1.4.1</b>  | e-144 | <a href="#">P0A9S7</a> | 8 | amino acid         |
| YP_002402424.1 | + | + | + | + | + | + | + | + | + | <b>3.A.1.5.1</b>  | 0     | <a href="#">P06202</a> | 8 | peptide            |
| YP_002402428.1 | + | + | + | + | + | + | + | + | + | <b>3.A.1.5.1</b>  | 0     | <a href="#">P08007</a> | 8 | peptide            |
| YP_002402571.1 | + | + | + | + | + | + | + | + | + | <b>3.A.1.5.1</b>  | 0     | <a href="#">P77348</a> | 8 | peptide            |
| YP_002402426.1 | + | + | + | + | + | + | + | + | + | <b>3.A.1.5.1</b>  | e-128 | <a href="#">P08006</a> | 8 | peptide            |
| YP_006107424.1 | - | + | + | + | - | + | + | + | + | <b>3.A.1.5.1</b>  | e-133 | <a href="#">P06202</a> | 6 | peptide            |
| YP_002402425.1 | + | + | + | + | + | + | + | + | + | <b>3.A.1.5.1</b>  | e-166 | <a href="#">P08005</a> | 8 | peptide            |
| YP_002402427.1 | + | + | + | + | + | + | + | + | + | <b>3.A.1.5.1</b>  | e-177 | <a href="#">P04285</a> | 8 | peptide            |
| YP_002402688.1 | + | - | - | - | + | + | + | + | + | <b>3.A.1.5.1</b>  | e-76  | <a href="#">P04285</a> | 5 | peptide            |
| YP_002401970.1 | + | + | + | + | + | + | + | + | + | <b>3.A.1.5.11</b> | 0     | <a href="#">P75796</a> | 8 | peptide            |
| YP_002401971.1 | + | + | + | + | + | + | + | + | + | <b>3.A.1.5.11</b> | 0     | <a href="#">P75797</a> | 8 | peptide            |
| YP_851922.1    | - | - | + | - | - | - | - | + | + | <b>3.A.1.5.11</b> | e-129 | <a href="#">P75797</a> | 2 | peptide            |
| YP_002401972.1 | + | + | + | + | + | + | + | + | + | <b>3.A.1.5.11</b> | e-150 | <a href="#">P75798</a> | 8 | peptide            |
| YP_002401973.1 | + | + | + | + | + | + | + | + | + | <b>3.A.1.5.11</b> | e-157 | <a href="#">P75799</a> | 8 | peptide            |
| YP_006108554.1 | - | + | + | + | - | - | - | - | + | <b>3.A.1.5.11</b> | e-22  | <a href="#">P75797</a> | 3 | peptide            |
| YP_002402689.1 | + | - | - | - | + | + | + | + | + | <b>3.A.1.5.11</b> | e-49  | <a href="#">P75799</a> | 5 | peptide            |
| YP_002402687.1 | + | - | - | - | + | + | + | + | + | <b>3.A.1.5.12</b> | e-69  | <a href="#">Q9X0F3</a> | 5 | sugar              |
| YP_006108550.1 | - | + | + | + | - | - | - | - | + | <b>3.A.1.5.20</b> | e-43  | <a href="#">P42065</a> | 3 | peptide            |
| YP_002403459.1 | + | + | + | + | + | + | + | + | + | <b>3.A.1.5.21</b> | 0     | <a href="#">P33913</a> | 8 | peptide (microcin) |
| YP_002403460.1 | + | + | + | + | + | + | + | + | + | <b>3.A.1.5.21</b> | 0     | <a href="#">P0AFU1</a> | 8 | peptide (microcin) |

1  
2  
3  
4  
5  
6  
7  
8  
9  
10  
11  
12  
13  
14  
15  
16  
17  
18  
19  
20  
21  
22  
23  
24  
25  
26  
27  
28  
29  
30  
31  
32  
33  
34  
35  
36  
37  
38  
39  
40  
41  
42  
43  
44  
45  
46  
47  
48  
49

|                |   |   |   |   |   |   |   |   |            |       |                        |   |                    |
|----------------|---|---|---|---|---|---|---|---|------------|-------|------------------------|---|--------------------|
| YP_002403461.1 | + | + | + | + | + | + | + | + | 3.A.1.5.21 | 0     | <a href="#">P33915</a> | 8 | peptide (microcin) |
| YP_002403462.1 | + | + | + | + | + | + | + | + | 3.A.1.5.21 | 0     | <a href="#">Q8ZNJ8</a> | 8 | peptide (microcin) |
| YP_002404922.1 | + | + | + | + | + | + | + | + | 3.A.1.5.27 | e-114 | <a href="#">P45096</a> | 8 | peptide            |
| YP_002404920.1 | + | + | + | + | + | + | + | + | 3.A.1.5.27 | e-117 | <a href="#">P45095</a> | 8 | peptide            |
| YP_002404919.1 | + | + | + | + | + | + | + | + | 3.A.1.5.27 | e-143 | <a href="#">P45094</a> | 8 | peptide            |
| YP_002404924.1 | + | + | + | + | + | + | + | + | 3.A.1.5.27 | e-168 | <a href="#">P33950</a> | 8 | peptide            |
| YP_002402691.1 | + | - | - | - | - | + | + | + | 3.A.1.5.27 | e-40  | <a href="#">P33950</a> | 4 | peptide            |
| YP_006108551.1 | - | + | + | + | - | - | - | - | 3.A.1.5.27 | e-47  | <a href="#">P45095</a> | 3 | peptide            |
| YP_006108553.1 | - | + | + | + | - | - | - | - | 3.A.1.5.27 | e-56  | <a href="#">P45096</a> | 3 | peptide            |
| YP_002402690.1 | + | - | - | - | + | + | + | + | 3.A.1.5.27 | e-59  | <a href="#">P45096</a> | 5 | peptide            |
| YP_002404921.1 | + | + | + | + | + | + | + | + | 3.A.1.5.27 | e-92  | <a href="#">P51000</a> | 8 | peptide            |
| YP_002401206.1 | + | + | + | + | + | + | + | + | 3.A.1.5.28 | e-09  | <a href="#">Q0P844</a> | 8 | cation             |
| YP_002401575.1 | + | + | + | + | + | + | + | + | 3.A.1.5.28 | e-09  | <a href="#">Q0P844</a> | 8 | cation             |
| YP_002401619.1 | + | + | + | + | + | + | + | + | 3.A.1.5.28 | e-25  | <a href="#">Q0P848</a> | 8 | cation             |
| YP_002404826.1 | + | + | + | + | + | + | + | + | 3.A.1.5.3  | 0     | <a href="#">P33590</a> | 8 | cation             |
| YP_002404829.1 | + | + | + | + | + | + | + | + | 3.A.1.5.3  | e-140 | <a href="#">P33593</a> | 8 | cation             |
| YP_002404828.1 | + | + | + | + | + | + | + | + | 3.A.1.5.3  | e-141 | <a href="#">P0AFA9</a> | 8 | cation             |
| YP_002404830.1 | + | + | + | + | + | + | + | + | 3.A.1.5.3  | e-148 | <a href="#">P33594</a> | 8 | cation             |
| YP_002404827.1 | + | + | + | + | + | + | + | + | 3.A.1.5.3  | e-180 | <a href="#">P33591</a> | 8 | cation             |
| YP_006108552.1 | - | + | + | + | - | - | - | - | 3.A.1.5.3  | e-33  | <a href="#">P0AFA9</a> | 3 | cation             |
| YP_002402534.1 | + | + | + | + | + | + | + | + | 3.A.1.5.5  | 0     | <a href="#">P36636</a> | 8 | peptide            |
| YP_002402537.1 | + | + | + | + | + | + | + | + | 3.A.1.5.5  | 0     | <a href="#">P36634</a> | 8 | peptide            |
| YP_002402533.1 | + | + | + | + | + | + | + | + | 3.A.1.5.5  | e-148 | <a href="#">P36638</a> | 8 | peptide            |
| YP_002402535.1 | + | + | + | + | + | + | + | + | 3.A.1.5.5  | e-152 | <a href="#">P0A2J5</a> | 8 | peptide            |
| YP_002402536.1 | + | + | + | + | + | + | + | + | 3.A.1.5.5  | e-152 | <a href="#">P0A2J3</a> | 8 | peptide            |
| YP_002405467.1 | + | + | + | + | + | + | + | + | 3.A.1.5.8  | e-34  | <a href="#">Q97UG5</a> | 8 | sugar              |
| YP_002403724.1 | + | + | + | + | + | + | + | + | 3.A.1.6.1  | 0     | <a href="#">P16676</a> | 8 | anion              |
| YP_002405298.1 | + | + | + | + | + | + | + | + | 3.A.1.6.1  | 0     | <a href="#">P0AG78</a> | 8 | anion              |
| YP_002403726.1 | + | + | + | + | + | + | + | + | 3.A.1.6.1  | e-125 | <a href="#">P16701</a> | 8 | anion              |
| YP_002403725.1 | + | + | + | + | + | + | + | + | 3.A.1.6.1  | e-155 | <a href="#">P0AEB0</a> | 8 | anion              |



1  
2  
3  
4  
5  
6  
7  
8  
9  
10  
11  
12  
13  
14  
15  
16  
17  
18  
19  
20  
21  
22  
23  
24  
25  
26  
27  
28  
29  
30  
31  
32  
33  
34  
35  
36  
37  
38  
39  
40  
41  
42  
43  
44  
45  
46  
47  
48  
49

|                |   |   |   |   |   |   |   |   |                   |       |                        |   |                           |
|----------------|---|---|---|---|---|---|---|---|-------------------|-------|------------------------|---|---------------------------|
| YP_002403727.1 | + | + | + | + | + | + | + | + | <b>3.A.1.6.1</b>  | e-175 | <a href="#">P16700</a> | 8 | anion                     |
| YP_006108366.1 | - | + | - | - | - | - | - | + | <b>3.A.1.6.1</b>  | e-46  | <a href="#">P0AG78</a> | 2 | anion                     |
| YP_002405117.1 | + | + | + | + | + | + | + | + | <b>3.A.1.7.1</b>  | 0     | <a href="#">P0AG82</a> | 8 | anion                     |
| YP_002405114.1 | + | + | + | + | + | + | + | + | <b>3.A.1.7.1</b>  | e-139 | <a href="#">P0AAH0</a> | 8 | anion                     |
| YP_002405115.1 | + | + | + | + | + | + | + | + | <b>3.A.1.7.1</b>  | e-153 | <a href="#">P07654</a> | 8 | anion                     |
| YP_002405116.1 | + | + | + | + | + | + | + | + | <b>3.A.1.7.1</b>  | e-153 | <a href="#">P0AGH8</a> | 8 | anion                     |
| YP_002401850.1 | + | + | + | + | + | + | + | + | <b>3.A.1.8.1</b>  | 0     | <a href="#">P09833</a> | 8 | anion                     |
| YP_002401848.1 | + | + | + | + | + | + | + | + | <b>3.A.1.8.1</b>  | e-141 | <a href="#">P37329</a> | 8 | anion                     |
| YP_002401849.1 | + | + | + | + | + | + | + | + | <b>3.A.1.8.1</b>  | e-85  | <a href="#">P0AF01</a> | 8 | anion                     |
| YP_002405474.1 | + | + | + | + | + | + | + | + | <b>3.A.1.9.1</b>  | 0     | <a href="#">P16682</a> | 8 | anion                     |
| YP_002405473.1 | + | + | + | + | + | + | + | - | <b>3.A.1.9.1</b>  | e-119 | <a href="#">P16683</a> | 7 | anion                     |
| YP_002405475.1 | + | + | + | + | + | + | + | + | <b>3.A.1.9.1</b>  | e-146 | <a href="#">P16677</a> | 8 | anion                     |
| YP_006107835.1 | - | + | - | + | - | - | + | - | <b>3.A.11.1.3</b> | e-09  | <a href="#">Q8VRK4</a> | 3 | DNA                       |
| YP_853201.1    | - | - | + | - | - | - | - | - | <b>3.A.11.1.3</b> | e-14  | <a href="#">Q8VRK4</a> | 1 | DNA                       |
| YP_002404645.1 | + | + | + | + | + | + | + | + | <b>3.A.11.1.3</b> | e-33  | <a href="#">Q8VRK4</a> | 8 | DNA                       |
| YP_002402053.1 | + | + | + | + | + | + | + | + | <b>3.A.11.2.2</b> | e-81  | <a href="#">P44408</a> | 8 | DNA                       |
| YP_002401572.1 | + | + | + | + | + | + | + | + | <b>3.A.11.2.3</b> | e-14  | <a href="#">A1EMW4</a> | 8 | DNA                       |
| YP_002405316.1 | + | + | + | + | + | + | + | + | <b>3.A.11.3.1</b> | e-68  | <a href="#">Q9ZKE4</a> | 8 | DNA                       |
| YP_002402314.1 | + | + | + | + | + | + | + | + | <b>3.A.11.3.1</b> | e-08  | <a href="#">Q9ZKE4</a> | 8 | DNA                       |
| YP_002402030.1 | + | + | + | + | + | + | + | + | <b>3.A.12.1.2</b> | 0     | <a href="#">P46889</a> | 8 | putative DNA translocator |
| YP_001462785.1 | - | - | - | - | + | - | - | - | <b>3.A.13.1.1</b> | e-23  | <a href="#">P03657</a> | 1 | filamentous phage         |
| YP_002404339.1 | + | + | + | - | + | + | - | - | <b>3.A.15.1.1</b> | 0     | <a href="#">P15645</a> | 5 | protein                   |
| YP_006107724.1 | - | + | + | + | - | - | - | + | <b>3.A.15.1.1</b> | e-08  | <a href="#">P15749</a> | 4 | protein                   |
| YP_006107726.1 | - | + | + | + | - | - | - | + | <b>3.A.15.1.1</b> | e-09  | <a href="#">P15751</a> | 4 | protein                   |
| NP_755965.1    | - | - | - | + | - | - | - | + | <b>3.A.15.1.1</b> | e-09  | <a href="#">P15748</a> | 2 | protein                   |
| YP_858931.1    | - | - | + | - | - | - | - | - | <b>3.A.15.1.1</b> | e-09  | <a href="#">P15748</a> | 1 | protein                   |
| YP_002404331.1 | + | - | - | - | + | - | - | - | <b>3.A.15.1.1</b> | e-11  | <a href="#">P15752</a> | 2 | protein                   |
| YP_854398.1    | - | - | + | - | - | - | - | + | <b>3.A.15.1.1</b> | e-12  | <a href="#">P15752</a> | 2 | protein                   |
| YP_002404332.1 | + | + | - | - | + | - | - | - | <b>3.A.15.1.1</b> | e-13  | <a href="#">P15751</a> | 3 | protein                   |
| YP_002414101.1 | - | - | - | - | - | + | - | - | <b>3.A.15.1.1</b> | e-14  | <a href="#">P15751</a> | 1 | protein                   |

1  
2  
3  
4  
5  
6  
7  
8  
9  
10  
11  
12  
13  
14  
15  
16  
17  
18  
19  
20  
21  
22  
23  
24  
25  
26  
27  
28  
29  
30  
31  
32  
33  
34  
35  
36  
37  
38  
39  
40  
41  
42  
43  
44  
45  
46  
47  
48  
49

|    |                |   |   |   |   |   |   |   |   |                   |       |                        |   |         |
|----|----------------|---|---|---|---|---|---|---|---|-------------------|-------|------------------------|---|---------|
| 4  | YP_006107719.1 | - | + | + | + | - | - | - | + | <b>3.A.15.1.1</b> | e-148 | <a href="#">P15645</a> | 4 | protein |
| 5  | YP_002404341.1 | + | - | - | - | + | + | - | - | <b>3.A.15.1.1</b> | e-17  | <a href="#">P15643</a> | 3 | protein |
| 6  | YP_006107362.1 | - | + | + | - | - | - | - | - | <b>3.A.15.1.1</b> | e-17  | <a href="#">P15643</a> | 2 | protein |
| 7  | YP_002404334.1 | + | + | + | - | + | + | - | - | <b>3.A.15.1.1</b> | e-26  | <a href="#">P15749</a> | 5 | protein |
| 8  | YP_006107725.1 | - | + | + | + | - | - | - | + | <b>3.A.15.1.1</b> | e-31  | <a href="#">P15750</a> | 4 | protein |
| 9  | YP_002404333.1 | + | + | + | + | + | + | - | - | <b>3.A.15.1.1</b> | e-38  | <a href="#">P15750</a> | 6 | protein |
| 10 | YP_002404337.1 | + | + | + | - | + | + | - | - | <b>3.A.15.1.1</b> | e-50  | <a href="#">P15746</a> | 5 | protein |
| 11 | YP_006107721.1 | - | + | + | + | - | - | - | + | <b>3.A.15.1.1</b> | e-54  | <a href="#">P15746</a> | 4 | protein |
| 12 | YP_006107720.1 | - | + | + | + | - | - | - | + | <b>3.A.15.1.1</b> | e-71  | <a href="#">P15745</a> | 4 | protein |
| 13 | YP_002404338.1 | + | + | + | - | + | + | - | - | <b>3.A.15.1.1</b> | e-90  | <a href="#">P15745</a> | 5 | protein |
| 14 | YP_006107728.1 | - | + | + | + | - | - | - | + | <b>3.A.15.2.1</b> | e-21  | <a href="#">P22610</a> | 4 | protein |
| 15 | YP_002272778.1 | - | - | - | - | - | - | + | - | <b>3.A.15.2.1</b> | e-24  | <a href="#">P22610</a> | 1 | protein |
| 16 | YP_002404682.1 | + | - | - | - | + | + | - | - | <b>3.A.15.2.1</b> | e-24  | <a href="#">P22610</a> | 3 | protein |
| 17 | YP_002401239.1 | + | + | + | + | - | + | + | + | <b>3.A.15.2.1</b> | e-30  | <a href="#">P22609</a> | 7 | protein |
| 18 | YP_002404343.1 | + | + | + | - | + | + | - | + | <b>3.A.15.2.1</b> | e-35  | <a href="#">P22610</a> | 6 | protein |
| 19 | YP_002404215.1 | + | + | + | + | + | + | + | + | <b>3.A.15.2.1</b> | e-74  | <a href="#">P24559</a> | 8 | protein |
| 20 | YP_002401240.1 | + | + | + | + | + | + | + | + | <b>3.A.15.2.1</b> | e-90  | <a href="#">P22608</a> | 8 | protein |
| 21 | NP_755574.1    | - | - | - | + | - | + | - | - | <b>3.A.15.3.1</b> | e-11  | <a href="#">Q5ZUC9</a> | 2 | protein |
| 22 | YP_002404237.1 | + | - | - | - | + | - | - | - | <b>3.A.16.1.2</b> | e-25  | <a href="#">P25694</a> | 2 | protein |
| 23 | YP_002404550.1 | + | + | + | - | + | + | + | + | <b>3.A.16.1.2</b> | e-51  | <a href="#">P25694</a> | 7 | protein |
| 24 | YP_859985.1    | - | - | + | - | - | + | - | + | <b>3.A.17.1.1</b> | 0     | <a href="#">P08956</a> | 3 | DNA     |
| 25 | YP_002403466.1 | + | + | + | + | + | + | + | + | <b>3.A.17.1.1</b> | e-11  | <a href="#">P08956</a> | 8 | DNA     |
| 26 | YP_002405855.1 | + | + | - | + | - | - | + | - | <b>3.A.17.1.1</b> | e-40  | <a href="#">P08956</a> | 4 | DNA     |
| 27 | YP_002404536.1 | + | + | + | + | + | + | + | + | <b>3.A.18.1.1</b> | e-60  | <a href="#">P38919</a> | 8 | mRNA    |
| 28 | YP_002403871.1 | + | + | + | + | + | + | + | + | <b>3.A.18.1.1</b> | e-47  | <a href="#">P38919</a> | 8 | mRNA    |
| 29 | YP_002405164.1 | + | + | + | + | + | + | + | + | <b>3.A.18.1.1</b> | e-51  | <a href="#">P38919</a> | 8 | mRNA    |
| 30 | YP_002402586.1 | + | + | + | + | + | + | + | + | <b>3.A.18.1.1</b> | e-56  | <a href="#">P38919</a> | 8 | mRNA    |
| 31 | YP_002401938.1 | + | + | + | + | + | + | + | + | <b>3.A.18.1.1</b> | e-60  | <a href="#">P38919</a> | 8 | mRNA    |
| 32 | YP_002405125.1 | + | + | + | + | + | + | + | + | <b>3.A.2.1.1</b>  | 0     | <a href="#">P0ABB4</a> | 8 | cation  |
| 33 | YP_002405127.1 | + | + | - | + | + | + | + | + | <b>3.A.2.1.1</b>  | 0     | <a href="#">P0ABB0</a> | 7 | cation  |

1  
2  
3  
4  
5  
6  
7  
8  
9  
10  
11  
12  
13  
14  
15  
16  
17  
18  
19  
20  
21  
22  
23  
24  
25  
26  
27  
28  
29  
30  
31  
32  
33  
34  
35  
36  
37  
38  
39  
40  
41  
42  
43  
44  
45  
46  
47  
48  
49

|                |   |   |   |   |   |   |   |   |           |       |                        |   |         |
|----------------|---|---|---|---|---|---|---|---|-----------|-------|------------------------|---|---------|
| YP_002405131.1 | + | + | + | + | + | + | + | + | 3.A.2.1.1 | e-143 | <a href="#">P0AB98</a> | 8 | cation  |
| YP_002405126.1 | + | + | + | + | + | + | + | + | 3.A.2.1.1 | e-152 | <a href="#">P0ABA6</a> | 8 | cation  |
| YP_002405130.1 | + | + | - | + | + | + | + | + | 3.A.2.1.1 | e-21  | <a href="#">P68699</a> | 7 | cation  |
| YP_002405124.1 | + | + | - | + | + | + | + | + | 3.A.2.1.1 | e-65  | <a href="#">P0A6E6</a> | 7 | cation  |
| YP_002405129.1 | + | + | - | + | + | + | + | + | 3.A.2.1.1 | e-66  | <a href="#">P0ABA0</a> | 7 | cation  |
| YP_002405128.1 | + | + | - | + | + | + | + | + | 3.A.2.1.1 | e-93  | <a href="#">P0ABA4</a> | 7 | cation  |
| YP_002405659.1 | + | + | + | + | + | + | + | + | 3.A.3.4.1 | 0     | <a href="#">P36640</a> | 8 | cation  |
| YP_002404846.1 | + | - | - | - | - | - | - | - | 3.A.3.5.4 | 0     | <a href="#">Q9ZHC7</a> | 1 | cation  |
| YP_002401613.1 | + | + | + | + | + | + | + | + | 3.A.3.5.5 | 0     | <a href="#">Q59385</a> | 8 | cation  |
| YP_002404819.1 | + | + | + | + | + | + | + | + | 3.A.3.6.2 | 0     | <a href="#">P37617</a> | 8 | cation  |
| YP_002401790.1 | + | + | + | + | + | + | + | + | 3.A.3.7.1 | 0     | <a href="#">P03960</a> | 8 | cation  |
| YP_002401791.1 | + | + | + | + | + | + | + | + | 3.A.3.7.1 | 0     | <a href="#">P03959</a> | 8 | cation  |
| YP_002401789.1 | + | + | + | + | + | + | + | + | 3.A.3.7.1 | e-98  | <a href="#">P03961</a> | 8 | cation  |
| YP_002404877.1 | + | - | - | - | + | + | + | + | 3.A.4.1.1 | 0     | <a href="#">P0AB93</a> | 5 | anion   |
| YP_002414640.1 | - | - | - | - | - | + | - | - | 3.A.4.1.1 | 0     | <a href="#">P08690</a> | 1 | anion   |
| YP_002401234.1 | + | + | + | + | + | + | + | + | 3.A.5.1.1 | 0     | <a href="#">P10408</a> | 8 | protein |
| YP_002403901.1 | + | + | + | + | + | + | + | + | 3.A.5.1.1 | 0     | <a href="#">P0AGD7</a> | 8 | protein |
| YP_002404659.1 | + | + | + | + | + | + | + | + | 3.A.5.1.1 | 0     | <a href="#">P0AGA2</a> | 8 | protein |
| YP_002404814.1 | + | + | + | + | + | + | + | + | 3.A.5.1.1 | 0     | <a href="#">P10121</a> | 8 | protein |
| YP_002405355.1 | + | + | + | + | + | + | + | + | 3.A.5.1.1 | e-48  | <a href="#">P0AG96</a> | 8 | protein |
| YP_002404547.1 | + | + | + | + | + | + | + | + | 3.A.5.1.1 | e-57  | <a href="#">P0AG99</a> | 8 | protein |
| YP_002401585.1 | + | + | + | + | + | + | + | + | 3.A.5.1.1 | e-65  | <a href="#">P0AAQ6</a> | 8 | protein |
| YP_002331410.1 | - | - | - | - | - | - | + | - | 3.A.6.1.1 | e-108 | <a href="#">P40290</a> | 1 | protein |
| YP_002413886.1 | - | - | - | - | - | + | + | - | 3.A.6.1.1 | e-126 | <a href="#">P0C2V3</a> | 2 | protein |
| YP_002331411.1 | - | - | - | - | - | - | + | - | 3.A.6.1.1 | e-133 | <a href="#">P0C2V3</a> | 1 | protein |
| YP_001464196.1 | - | - | - | - | + | + | + | - | 3.A.6.1.1 | e-14  | <a href="#">Q7BFA7</a> | 3 | protein |
| YP_002405167.1 | + | + | + | + | + | + | + | + | 3.A.6.1.1 | e-15  | <a href="#">P40290</a> | 8 | protein |
| YP_002404120.1 | + | - | - | - | + | - | + | - | 3.A.6.1.1 | e-22  | <a href="#">Q7BFA4</a> | 3 | protein |
| YP_002404125.1 | + | - | - | - | + | + | - | - | 3.A.6.1.1 | e-23  | <a href="#">Q93KT5</a> | 3 | protein |
| YP_002413872.1 | - | - | - | - | - | + | - | - | 3.A.6.1.1 | e-23  | <a href="#">Q7BFA4</a> | 1 | protein |

1  
2  
3  
4  
5  
6  
7  
8  
9  
10  
11  
12  
13  
14  
15  
16  
17  
18  
19  
20  
21  
22  
23  
24  
25  
26  
27  
28  
29  
30  
31  
32  
33  
34  
35  
36  
37  
38  
39  
40  
41  
42  
43  
44  
45  
46  
47  
48  
49

|    |                |   |   |   |   |   |   |   |            |       |                        |   |         |
|----|----------------|---|---|---|---|---|---|---|------------|-------|------------------------|---|---------|
| 4  | YP_002331423.1 | - | - | - | - | - | + | - | 3.A.6.1.1  | e-24  | <a href="#">Q93KT5</a> | 1 | protein |
| 5  | YP_001464194.1 | - | - | - | - | + | + | + | 3.A.6.1.1  | e-26  | <a href="#">Q93KT4</a> | 3 | protein |
| 6  | YP_002331415.1 | - | - | - | - | - | + | - | 3.A.6.1.1  | e-29  | <a href="#">Q7BFA4</a> | 1 | protein |
| 7  | YP_002404126.1 | + | - | - | - | + | + | + | 3.A.6.1.1  | e-32  | <a href="#">Q9ZA77</a> | 4 | protein |
| 8  | YP_002331425.1 | - | - | - | - | - | + | - | 3.A.6.1.1  | e-47  | <a href="#">Q9ZA77</a> | 1 | protein |
| 9  | YP_002331422.1 | - | - | - | - | - | + | - | 3.A.6.1.1  | e-57  | <a href="#">Q93KT4</a> | 1 | protein |
| 10 | YP_002413885.1 | - | - | - | - | - | + | + | 3.A.6.1.1  | e-99  | <a href="#">P40290</a> | 2 | protein |
| 11 | YP_002403112.1 | + | + | + | + | + | + | + | 3.A.6.2.1  | 0     | <a href="#">P40729</a> | 8 | protein |
| 12 | YP_002403210.1 | + | + | + | + | + | + | + | 3.A.6.2.1  | 0     | <a href="#">P15928</a> | 8 | protein |
| 13 | YP_002403213.1 | + | + | + | + | + | + | + | 3.A.6.2.1  | 0     | <a href="#">P26465</a> | 8 | protein |
| 14 | YP_002403212.1 | + | + | + | + | + | + | + | 3.A.6.2.1  | e-89  | <a href="#">P15934</a> | 8 | protein |
| 15 | YP_002403222.1 | + | + | + | + | + | + | + | 3.A.6.2.1  | e-115 | <a href="#">P54702</a> | 8 | protein |
| 16 | YP_002411033.1 | - | - | - | - | - | + | - | 3.A.6.2.1  | e-118 | <a href="#">P26465</a> | 1 | protein |
| 17 | YP_002403220.1 | + | + | + | + | + | + | + | 3.A.6.2.1  | e-122 | <a href="#">P54700</a> | 8 | protein |
| 18 | YP_002411026.1 | - | - | - | - | - | + | - | 3.A.6.2.1  | e-13  | <a href="#">P26419</a> | 1 | protein |
| 19 | YP_002411023.1 | - | - | - | - | - | + | - | 3.A.6.2.1  | e-17  | <a href="#">P54702</a> | 1 | protein |
| 20 | YP_002403113.1 | + | + | + | + | + | + | + | 3.A.6.2.1  | e-174 | <a href="#">P40727</a> | 8 | protein |
| 21 | YP_002403219.1 | + | + | + | + | + | + | + | 3.A.6.2.1  | e-19  | <a href="#">P0A1L1</a> | 8 | protein |
| 22 | YP_002403221.1 | + | + | + | + | + | + | + | 3.A.6.2.1  | e-25  | <a href="#">P0A1L5</a> | 8 | protein |
| 23 | YP_002411030.1 | - | - | - | - | - | + | - | 3.A.6.2.1  | e-50  | <a href="#">P15928</a> | 1 | protein |
| 24 | YP_002411022.1 | - | - | - | - | - | + | - | 3.A.6.2.1  | e-53  | <a href="#">P40727</a> | 1 | protein |
| 25 | YP_002411025.1 | - | - | - | - | - | + | - | 3.A.6.2.1  | e-54  | <a href="#">P54700</a> | 1 | protein |
| 26 | YP_002403218.1 | + | + | + | + | + | + | + | 3.A.6.2.1  | e-67  | <a href="#">P26419</a> | 8 | protein |
| 27 | YP_002401381.1 | + | + | + | + | + | + | - | 3.A.6.2.1  | e-99  | <a href="#">P40729</a> | 7 | protein |
| 28 | YP_852012.1    | - | - | + | - | - | + | - | 3.A.7.11.1 | e-14  | <a href="#">Q30554</a> | 2 | DNA     |
| 29 | YP_002411637.1 | - | - | - | - | - | + | - | 3.A.7.11.1 | e-18  | <a href="#">Q30554</a> | 1 | DNA     |
| 30 | YP_853472.1    | - | - | + | - | - | - | - | 3.A.7.11.1 | e-18  | <a href="#">Q30554</a> | 1 | DNA     |
| 31 | YP_002405757.1 | + | - | - | - | - | - | - | 3.A.7.11.1 | e-18  | <a href="#">Q5EPC7</a> | 1 | DNA     |
| 32 | YP_002404155.1 | + | + | + | + | + | + | + | 3.A.7.11.1 | e-19  | <a href="#">Q5K698</a> | 8 | DNA     |
| 33 | YP_002270067.1 | - | - | - | - | - | + | - | 3.A.7.11.1 | e-19  | <a href="#">Q30554</a> | 1 | DNA     |

1  
2  
3  
4  
5  
6  
7  
8  
9  
10  
11  
12  
13  
14  
15  
16  
17  
18  
19  
20  
21  
22  
23  
24  
25  
26  
27  
28  
29  
30  
31  
32  
33  
34  
35  
36  
37  
38  
39  
40  
41  
42  
43  
44  
45  
46  
47  
48  
49

|                |   |   |   |   |   |   |   |   |            |       |                        |   |               |
|----------------|---|---|---|---|---|---|---|---|------------|-------|------------------------|---|---------------|
| YP_853783.1    | - | - | + | - | - | - | - | - | 3.A.7.11.1 | e-20  | <a href="#">Q30554</a> | 1 | DNA           |
| YP_001464376.1 | - | - | - | - | + | - | - | - | 3.A.7.11.1 | e-31  | Q5EP68                 | 1 | DNA           |
| YP_006104466.1 | - | + | + | - | - | + | - | - | 3.A.7.13.2 | e-11  | <a href="#">E9RJ18</a> | 3 | DNA           |
| YP_002403457.1 | + | + | + | + | + | + | + | + | 3.A.7.13.2 | e-13  | <a href="#">E9RJ18</a> | 8 | DNA           |
| NP_754289.1    | - | - | - | + | - | - | - | - | 3.A.7.14.1 | e-25  | <a href="#">Q52001</a> | 1 | DNA           |
| YP_002402937.1 | + | + | + | + | + | + | + | + | 3.A.7.14.2 | e-09  | <a href="#">Q15HU6</a> | 8 | DNA           |
| YP_002401378.1 | + | - | - | + | + | - | + | + | 3.A.7.14.2 | e-11  | <a href="#">Q15HU6</a> | 5 | DNA           |
| YP_002402954.1 | + | + | + | + | + | + | + | + | 3.A.7.14.2 | e-12  | <a href="#">Q15HU4</a> | 8 | DNA           |
| YP_002402885.1 | + | + | - | + | + | + | + | + | 3.A.7.14.2 | e-16  | <a href="#">Q15HU6</a> | 7 | DNA           |
| YP_002402282.1 | + | + | + | + | + | + | + | + | 3.A.7.14.2 | e-20  | <a href="#">Q15HU6</a> | 8 | DNA           |
| YP_002413012.1 | - | - | - | - | - | + | - | - | 3.A.7.2.1  | e-40  | <a href="#">Q50337</a> | 1 | DNA           |
| YP_002413004.1 | - | - | - | - | - | + | - | - | 3.A.7.3.1  | e-130 | <a href="#">Q7VSX9</a> | 1 | protein       |
| YP_002413010.1 | - | - | - | - | - | + | - | - | 3.A.7.3.1  | e-18  | <a href="#">Q91UR4</a> | 1 | protein       |
| YP_002413011.1 | - | - | - | - | - | + | - | - | 3.A.7.3.1  | e-39  | <a href="#">Q9RPX6</a> | 1 | protein       |
| YP_002413013.1 | - | - | - | - | - | + | - | - | 3.A.7.3.1  | e-60  | <a href="#">Q91UW6</a> | 1 | protein       |
| YP_002402513.1 | + | + | + | + | + | + | + | + | 3.A.7.7.1  | e-27  | <a href="#">Q07711</a> | 8 | DNA           |
| YP_002402987.1 | + | + | + | + | + | + | + | + | 3.A.7.7.1  | e-66  | <a href="#">Q07711</a> | 8 | DNA           |
| YP_002403904.1 | + | + | - | + | + | + | + | + | 3.A.8.1.1  | e-22  | <a href="#">P38523</a> | 7 | protein       |
| YP_852649.1    | - | - | + | + | - | - | - | - | 3.A.9.1.1  | e-08  | <a href="#">Q8SKU2</a> | 2 | protein       |
| YP_002403359.1 | + | + | + | + | + | + | + | + | 3.A.9.1.1  | e-14  | <a href="#">Q02028</a> | 8 | protein       |
| YP_001461820.1 | - | - | - | - | + | + | + | + | 3.A.9.1.1  | e-80  | <a href="#">Q02028</a> | 4 | protein       |
| YP_006106088.1 | - | + | - | + | - | - | - | - | 3.A.9.1.1  | e-85  | <a href="#">Q02028</a> | 2 | protein       |
| YP_002404621.1 | + | + | + | + | + | + | + | + | 3.B.1.1.5  | e-09  | <a href="#">Q9V0A6</a> | 8 | cation (Na +) |
| YP_002403582.1 | + | + | + | + | + | + | + | + | 3.B.1.1.5  | e-11  | <a href="#">Q9V0A4</a> | 8 | cation (Na +) |
| YP_002403542.1 | + | + | + | + | + | + | + | + | 3.D.1.1.1  | 0     | <a href="#">P0AFF0</a> | 8 | Cation (H+)   |
| YP_002403543.1 | + | + | + | + | + | + | + | + | 3.D.1.1.1  | 0     | <a href="#">P0AFE8</a> | 8 | Cation (H+)   |
| YP_002403544.1 | + | + | + | + | + | + | + | + | 3.D.1.1.1  | 0     | <a href="#">P33607</a> | 8 | Cation (H+)   |
| YP_002403549.1 | + | + | + | + | + | + | + | + | 3.D.1.1.1  | 0     | <a href="#">P33602</a> | 8 | Cation (H+)   |
| YP_002403550.1 | + | + | + | + | + | + | + | + | 3.D.1.1.1  | 0     | <a href="#">P31979</a> | 8 | Cation (H+)   |
| YP_002403552.1 | + | + | + | + | + | + | + | + | 3.D.1.1.1  | 0     | <a href="#">P33599</a> | 8 | Cation (H+)   |

1  
2  
3  
4  
5  
6  
7  
8  
9  
10  
11  
12  
13  
14  
15  
16  
17  
18  
19  
20  
21  
22  
23  
24  
25  
26  
27  
28  
29  
30  
31  
32  
33  
34  
35  
36  
37  
38  
39  
40  
41  
42  
43  
44  
45  
46  
47  
48  
49

|                |   |   |   |   |   |   |   |   |   |                  |       |                        |   |             |
|----------------|---|---|---|---|---|---|---|---|---|------------------|-------|------------------------|---|-------------|
| YP_002403547.1 | + | + | + | + | + | + | + | + | + | <b>3.D.1.1.1</b> | e-107 | <a href="#">P0AFD6</a> | 8 | Cation (H+) |
| YP_002403553.1 | + | + | + | + | + | + | + | + | + | <b>3.D.1.1.1</b> | e-129 | <a href="#">P0AFC7</a> | 8 | Cation (H+) |
| YP_002403548.1 | + | + | + | + | + | + | + | + | + | <b>3.D.1.1.1</b> | e-179 | <a href="#">P0AFD4</a> | 8 | Cation (H+) |
| YP_002401788.1 | + | + | + | + | + | + | + | + | + | <b>3.D.1.1.1</b> | e-31  | <a href="#">P0AFE4</a> | 8 | Cation (H+) |
| YP_002403554.1 | + | + | + | + | + | + | + | + | + | <b>3.D.1.1.1</b> | e-81  | <a href="#">P0AFC3</a> | 8 | Cation (H+) |
| YP_002403546.1 | + | + | + | + | + | + | + | + | + | <b>3.D.1.1.1</b> | e-84  | <a href="#">P0AFE0</a> | 8 | Cation (H+) |
| YP_002403551.1 | + | + | + | + | + | + | + | + | + | <b>3.D.1.1.1</b> | e-97  | <a href="#">P0AFD1</a> | 8 | Cation (H+) |
| YP_006107377.1 | - | + | + | + | + | - | - | - | - | <b>3.D.1.6.3</b> | e-10  | <a href="#">Q9SK66</a> | 4 | Cation (H+) |
| YP_002403856.1 | + | + | + | + | + | + | + | + | + | <b>3.D.1.6.4</b> | e-06  | <a href="#">Q6V9B1</a> | 8 | Cation (H+) |
| YP_002404711.1 | + | + | + | + | + | + | + | + | + | <b>3.D.1.8.1</b> | e-09  | <a href="#">F4K2G0</a> | 8 | Cation (H+) |
| YP_002401655.1 | + | - | - | + | + | + | + | + | + | <b>3.D.1.8.1</b> | e-13  | <a href="#">F4K2G0</a> | 6 | Cation (H+) |
| YP_002403781.1 | + | - | - | - | + | + | + | + | + | <b>3.D.1.9.1</b> | 0     | <a href="#">P77329</a> | 5 | Cation (H+) |
| YP_002413502.1 | - | - | - | - | - | + | + | + | + | <b>3.D.1.9.1</b> | 0     | <a href="#">P77416</a> | 3 | Cation (H+) |
| YP_002403778.1 | + | - | - | - | - | + | + | + | + | <b>3.D.1.9.1</b> | 0     | <a href="#">P23482</a> | 4 | Cation (H+) |
| YP_002403780.1 | + | - | - | - | - | + | + | + | + | <b>3.D.1.9.1</b> | 0     | <a href="#">P77437</a> | 4 | Cation (H+) |
| YP_859767.1    | - | - | + | + | - | - | - | - | - | <b>3.D.1.9.1</b> | e-09  | <a href="#">P77423</a> | 2 | Cation (H+) |
| YP_001463808.1 | - | - | - | - | + | + | - | + | + | <b>3.D.1.9.1</b> | e-104 | <a href="#">P0AEW1</a> | 3 | Cation (H+) |
| YP_002403777.1 | + | - | - | - | + | + | + | + | + | <b>3.D.1.9.1</b> | e-118 | <a href="#">P23481</a> | 5 | Cation (H+) |
| YP_001463807.1 | - | - | - | - | + | + | + | + | + | <b>3.D.1.9.1</b> | e-124 | <a href="#">P77858</a> | 4 | Cation (H+) |
| YP_002403783.1 | + | - | - | - | + | + | + | + | + | <b>3.D.1.9.1</b> | e-140 | <a href="#">P77668</a> | 5 | Cation (H+) |
| YP_002404148.1 | + | + | + | + | + | + | - | + | + | <b>3.D.1.9.1</b> | e-30  | <a href="#">P23481</a> | 7 | Cation (H+) |
| YP_002403782.1 | + | - | - | - | + | + | + | + | + | <b>3.D.1.9.1</b> | e-91  | <a href="#">P77423</a> | 5 | Cation (H+) |
| YP_002403982.1 | + | + | + | + | + | + | + | + | + | <b>3.D.1.9.2</b> | 0     | <a href="#">P16431</a> | 8 | Cation (H+) |
| YP_002403984.1 | + | + | + | + | + | + | + | + | + | <b>3.D.1.9.2</b> | 0     | <a href="#">P16429</a> | 8 | Cation (H+) |
| YP_002403981.1 | + | + | + | + | + | + | + | + | + | <b>3.D.1.9.2</b> | e-105 | <a href="#">P16432</a> | 8 | Cation (H+) |
| YP_002403985.1 | + | + | + | + | + | + | + | + | + | <b>3.D.1.9.2</b> | e-107 | <a href="#">P0AAK3</a> | 8 | Cation (H+) |
| YP_002403980.1 | + | + | + | + | + | + | + | + | + | <b>3.D.1.9.2</b> | e-148 | <a href="#">P16433</a> | 8 | Cation (H+) |
| YP_002403983.1 | + | + | + | + | + | + | + | + | + | <b>3.D.1.9.2</b> | e-148 | <a href="#">P16430</a> | 8 | Cation (H+) |
| YP_002404149.1 | + | + | + | + | + | + | + | + | + | <b>3.D.1.9.2</b> | e-30  | <a href="#">P0AAK3</a> | 8 | Cation (H+) |
| YP_002403971.1 | + | + | + | + | + | + | + | + | + | <b>3.D.1.9.2</b> | e-32  | <a href="#">P0AAK3</a> | 8 | Cation (H+) |

1  
2  
3  
4  
5  
6  
7  
8  
9  
10  
11  
12  
13  
14  
15  
16  
17  
18  
19  
20  
21  
22  
23  
24  
25  
26  
27  
28  
29  
30  
31  
32  
33  
34  
35  
36  
37  
38  
39  
40  
41  
42  
43  
44  
45  
46  
47  
48  
49

|                |   |   |   |   |   |   |   |   |           |       |                        |   |                 |
|----------------|---|---|---|---|---|---|---|---|-----------|-------|------------------------|---|-----------------|
| YP_002403761.1 | + | + | + | + | + | + | + | + | 3.D.1.9.2 | e-33  | <a href="#">P0AAK3</a> | 8 | Cation (H+)     |
| YP_002404957.1 | + | + | + | + | + | + | + | + | 3.D.1.9.2 | e-34  | <a href="#">P0AAK3</a> | 8 | Cation (H+)     |
| YP_002402831.1 | + | + | + | + | + | + | + | + | 3.D.2.1.1 | 0     | <a href="#">P0AB67</a> | 8 | Cation (H+)     |
| YP_002402832.1 | + | + | + | + | + | + | + | + | 3.D.2.1.1 | 0     | <a href="#">P07001</a> | 8 | Cation (H+)     |
| YP_002401824.1 | + | + | + | + | + | + | + | + | 3.D.4.3.2 | 0     | <a href="#">P0ABJ9</a> | 8 | Cation (H+)     |
| YP_002402178.1 | + | + | + | + | + | + | + | + | 3.D.4.3.2 | 0     | <a href="#">P0ABJ9</a> | 8 | Cation (H+)     |
| YP_002401825.1 | + | + | - | + | + | + | + | + | 3.D.4.3.2 | 0     | <a href="#">P0ABK2</a> | 7 | Cation (H+)     |
| YP_002402179.1 | + | + | + | + | + | + | + | + | 3.D.4.3.2 | e-118 | <a href="#">P0ABK2</a> | 8 | Cation (H+)     |
| YP_002401561.1 | + | + | + | + | + | + | + | + | 3.D.4.5.1 | 0     | <a href="#">P0ABI8</a> | 8 | Cation (H+)     |
| YP_002401562.1 | + | + | + | + | + | + | + | + | 3.D.4.5.1 | 0     | <a href="#">P0ABJ1</a> | 8 | Cation (H+)     |
| YP_002401560.1 | + | + | + | + | + | + | + | + | 3.D.4.5.1 | e-103 | <a href="#">P0ABJ3</a> | 8 | Cation (H+)     |
| YP_002401559.1 | + | + | + | + | + | + | + | + | 3.D.4.5.1 | e-60  | <a href="#">P0ABJ6</a> | 8 | Cation (H+)     |
| YP_002402858.1 | + | + | + | + | + | + | + | + | 3.D.6.1.1 | e-41  | <a href="#">Q07394</a> | 8 | putative cation |
| YP_002402857.1 | + | + | + | + | + | + | + | + | 3.D.6.1.1 | e-53  | <a href="#">Q07396</a> | 8 | putative cation |
| YP_002402861.1 | + | + | + | + | + | + | + | + | 3.D.6.1.1 | e-36  | <a href="#">P97054</a> | 8 | putative cation |
| YP_002402862.1 | + | + | + | + | + | + | + | + | 3.D.6.1.1 | e-37  | <a href="#">P97055</a> | 8 | putative cation |
| YP_002402860.1 | + | + | + | + | + | + | + | + | 3.D.6.1.1 | e-42  | <a href="#">Q52715</a> | 8 | putative cation |
| YP_006105958.1 | - | + | - | + | - | + | - | + | 3.D.6.1.1 | e-79  | <a href="#">Q52716</a> | 4 | putative cation |
| YP_002402859.1 | + | - | + | - | + | - | + | + | 3.D.6.1.1 | e-82  | <a href="#">Q52716</a> | 5 | putative cation |
| YP_001463354.1 | - | - | - | - | + | + | - | - | 3.D.6.1.2 | e-29  | <a href="#">C4N8U0</a> | 2 | putative cation |
| YP_002403516.1 | + | + | + | + | + | + | + | + | 3.D.7.1.1 | e-14  | <a href="#">P96797</a> | 8 | Cation (H+)     |
| YP_002404349.1 | + | + | - | - | + | + | - | + | 3.D.7.1.1 | e-14  | <a href="#">P96797</a> | 5 | Cation (H+)     |
| YP_002404371.1 | + | + | + | + | + | + | + | + | 3.D.7.2.1 | e-139 | <a href="#">O67092</a> | 8 | Cation (H+)     |
| YP_002402173.1 | + | + | + | + | + | + | + | + | 3.D.7.2.1 | e-161 | <a href="#">O67092</a> | 8 | Cation (H+)     |
| YP_002402172.1 | + | + | + | + | + | + | + | + | 3.D.7.2.1 | e-92  | <a href="#">O67095</a> | 8 | Cation (H+)     |
| YP_002402174.1 | + | + | + | + | + | + | + | + | 3.D.7.2.2 | e-15  | <a href="#">P31875</a> | 8 | Cation (H+)     |
| YP_002404374.1 | + | + | + | + | + | + | + | + | 3.D.7.2.2 | e-68  | <a href="#">P31884</a> | 8 | Cation (H+)     |
| YP_002403487.1 | + | + | + | + | + | + | + | + | 3.D.8.1.2 | e-08  | <a href="#">Q48941</a> | 8 | Cation (H+)     |
| YP_002402301.1 | + | + | + | + | + | + | + | + | 4.A.1.1.1 | 0     | <a href="#">P69786</a> | 8 | sugar           |
| YP_002403720.1 | + | + | + | + | + | + | + | + | 4.A.1.1.1 | e-82  | <a href="#">P69783</a> | 8 | sugar           |

1  
2  
3  
4  
5  
6  
7  
8  
9  
10  
11  
12  
13  
14  
15  
16  
17  
18  
19  
20  
21  
22  
23  
24  
25  
26  
27  
28  
29  
30  
31  
32  
33  
34  
35  
36  
37  
38  
39  
40  
41  
42  
43  
44  
45  
46  
47  
48  
49

|                |   |   |   |   |   |   |   |   |            |       |                        |   |                                         |
|----------------|---|---|---|---|---|---|---|---|------------|-------|------------------------|---|-----------------------------------------|
| YP_002405072.1 | + | - | - | - | + | + | + | - | 4.A.1.1.10 | 0     | <a href="#">Q9AGA7</a> | 4 | sugars and polyols                      |
| YP_002413660.1 | - | - | - | - | - | + | - | - | 4.A.1.1.13 | e-141 | <a href="#">Q57071</a> | 1 | sugar                                   |
| YP_002401774.1 | + | + | + | + | + | + | + | + | 4.A.1.1.2  | 0     | <a href="#">P09323</a> | 8 | amine                                   |
| YP_002402850.1 | + | + | + | + | + | + | + | + | 4.A.1.1.3  | 0     | <a href="#">P19642</a> | 8 | sugar                                   |
| YP_006107114.1 | - | + | + | + | - | - | - | - | 4.A.1.1.3  | e-93  | <a href="#">P19642</a> | 3 | sugar                                   |
| YP_006108267.1 | - | + | + | + | - | - | - | - | 4.A.1.1.9  | e-116 | <a href="#">P20166</a> | 3 | sugar                                   |
| YP_002405774.1 | + | - | - | - | - | - | - | - | 4.A.1.1.9  | e-98  | <a href="#">P20166</a> | 1 | sugar                                   |
| YP_002405112.1 | + | + | + | + | + | - | - | + | 4.A.1.2.2  | 0     | <a href="#">P08722</a> | 6 | sugar                                   |
| YP_002403973.1 | + | - | + | - | + | + | + | + | 4.A.1.2.3  | 0     | <a href="#">P24241</a> | 6 | sugar                                   |
| YP_002405657.1 | + | + | + | + | + | + | + | + | 4.A.1.2.4  | 0     | <a href="#">P36672</a> | 8 | sugar                                   |
|                |   |   |   |   |   |   |   |   | 4.A.1.2.7  |       |                        |   | monocarboxylate<br>(Acetylmuramic acid) |
| YP_002403731.1 | + | + | + | + | + | + | + | + |            | 0     | <a href="#">P77272</a> | 8 |                                         |
| YP_002403448.1 | + | + | + | + | + | + | + | + | 4.A.2.1.1  | 0     | <a href="#">P20966</a> | 8 | sugar                                   |
| YP_002404578.1 | + | + | + | + | + | + | + | + | 4.A.2.1.1  | e-6   | <a href="#">P69811</a> | 8 | sugar                                   |
| YP_002403450.1 | + | + | + | + | + | + | + | + | 4.A.2.1.1  | e-180 | <a href="#">P69811</a> | 8 | sugar                                   |
| YP_002405329.1 | + | + | + | + | + | + | + | + | 4.A.2.1.10 | 0     | <a href="#">P32670</a> | 8 | unknown                                 |
| YP_002405330.1 | + | + | + | + | + | + | + | + | 4.A.2.1.10 | e-173 | <a href="#">P32672</a> | 8 | unknown                                 |
| YP_002405331.1 | + | + | - | + | + | + | + | + | 4.A.2.1.10 | e-46  | <a href="#">P69816</a> | 7 | unknown                                 |
| YP_002405334.1 | + | + | + | + | + | + | + | + | 4.A.2.1.10 | e-59  | <a href="#">P32676</a> | 8 | unknown                                 |
| YP_002403693.1 | + | + | + | + | + | + | + | + | 4.A.2.1.11 | 0     | <a href="#">P77439</a> | 8 | unknown                                 |
| YP_002403696.1 | + | + | + | + | + | + | + | + | 4.A.2.1.11 | 0     | <a href="#">P77579</a> | 8 | unknown                                 |
| YP_002403697.1 | + | + | + | + | + | + | + | + | 4.A.2.1.11 | e-48  | <a href="#">P69808</a> | 8 | unknown                                 |
| YP_002404576.1 | + | + | + | + | + | + | + | + | 4.A.2.1.14 | e-15  | <a href="#">D2RXA7</a> | 8 | putative sugar transport                |
| YP_002273416.1 | - | - | - | - | - | - | + | + | 4.A.2.1.14 | e-16  | <a href="#">D2RXA7</a> | 2 | putative sugar transport                |
| YP_002405282.1 | + | - | - | - | + | - | - | - | 4.A.2.1.14 | e-16  | <a href="#">D2RXA7</a> | 2 | putative sugar transport                |
| YP_002404987.1 | + | + | + | + | + | + | + | + | 4.A.2.1.2  | 0     | <a href="#">P00550</a> | 8 | polyol                                  |
| YP_002401821.1 | + | - | - | - | + | - | - | + | 4.A.2.1.3  | 0     | <a href="#">P54745</a> | 3 | monocarboxylate                         |
| YP_002404197.1 | + | + | + | + | + | + | + | + | 4.A.2.1.5  | e-118 | <a href="#">P42956</a> | 8 | polyol                                  |
| YP_002405281.1 | + | - | - | - | + | - | + | + | 4.A.2.1.6  | e-66  | <a href="#">Q31645</a> | 4 | sugar                                   |
| YP_006108084.1 | - | + | + | + | - | - | - | - | 4.A.2.1.9  | 0     | <a href="#">Q1R4T1</a> | 3 | putative sugar transport                |



1  
2  
3  
4  
5  
6  
7  
8  
9  
10  
11  
12  
13  
14  
15  
16  
17  
18  
19  
20  
21  
22  
23  
24  
25  
26  
27  
28  
29  
30  
31  
32  
33  
34  
35  
36  
37  
38  
39  
40  
41  
42  
43  
44  
45  
46  
47  
48  
49

|                |   |   |   |   |   |   |   |   |           |       |                        |   |                                    |
|----------------|---|---|---|---|---|---|---|---|-----------|-------|------------------------|---|------------------------------------|
| YP_006108085.1 | - | + | + | + | - | - | - | - | 4.A.2.1.9 | e-53  | <a href="#">Q8FC73</a> | 3 | putative sugar transport           |
| YP_006108086.1 | - | + | + | + | - | - | - | - | 4.A.2.1.9 | e-84  | <a href="#">Q1R4S9</a> | 3 | putative sugar transport           |
| YP_002402962.1 | + | + | + | + | + | + | + | + | 4.A.3.2.1 | 0     | <a href="#">P17334</a> | 8 | N,N'-diacetylchitobiose            |
| YP_002402739.1 | + | + | + | + | + | - | - | - | 4.A.3.2.1 | e-21  | <a href="#">P69791</a> | 5 | sugar<br>(N,N'-diacetylchitobiose) |
| YP_002402963.1 | + | + | + | + | + | + | + | + | 4.A.3.2.1 | e-48  | <a href="#">P69795</a> | 8 | sugar                              |
| YP_002402961.1 | + | + | + | + | + | + | + | + | 4.A.3.2.1 | e-59  | <a href="#">P69791</a> | 8 | sugar                              |
| YP_002402740.1 | + | + | + | + | + | - | - | - | 4.A.3.2.1 | e-72  | <a href="#">P17334</a> | 5 | sugar                              |
| YP_002402741.1 | + | + | + | + | + | - | - | - | 4.A.3.2.3 | e-16  | <a href="#">O50982</a> | 5 | sugar                              |
| YP_002403961.1 | + | + | + | + | + | + | - | + | 4.A.4.1.1 | e-169 | <a href="#">P56580</a> | 7 | polyol                             |
| YP_002413652.1 | - | - | - | - | - | + | - | - | 4.A.4.1.1 | e-31  | <a href="#">P56579</a> | 1 | polyol                             |
| YP_002403962.1 | + | + | + | + | + | + | + | + | 4.A.4.1.1 | e-67  | <a href="#">P05706</a> | 8 | polyol                             |
| YP_002403960.1 | + | + | + | + | + | + | - | + | 4.A.4.1.1 | e-92  | <a href="#">P56579</a> | 7 | polyol                             |
| YP_002413654.1 | - | - | - | - | - | + | - | - | 4.A.4.1.2 | e-69  | <a href="#">O32333</a> | 1 | polyol                             |
| YP_002403378.1 | + | + | + | + | + | + | + | + | 4.A.5.1.1 | 0     | <a href="#">P69831</a> | 8 | polyol                             |
| YP_002403379.1 | + | + | + | + | + | + | + | + | 4.A.5.1.1 | e-50  | <a href="#">P37188</a> | 8 | polyol                             |
| YP_002403380.1 | + | + | + | + | + | + | + | + | 4.A.5.1.1 | e-82  | <a href="#">P69828</a> | 8 | polyol                             |
| YP_002415483.1 | - | - | - | - | - | + | - | + | 4.A.5.1.3 | 0     | <a href="#">P39365</a> | 2 | putative sugar                     |
| YP_002415484.1 | - | - | - | - | - | + | - | + | 4.A.5.1.3 | e-48  | <a href="#">P58035</a> | 2 | putative sugar                     |
| YP_002415481.1 | - | - | - | - | - | + | - | + | 4.A.5.1.3 | e-81  | <a href="#">P39363</a> | 2 | putative sugar                     |
| YP_006107885.1 | - | + | + | + | - | + | + | - | 4.A.5.1.4 | 0     | <a href="#">Q8FCM4</a> | 5 | putative sugar                     |
| YP_006107884.1 | - | + | + | + | - | + | + | - | 4.A.5.1.4 | e-47  | <a href="#">Q8FCM5</a> | 5 | putative sugar                     |
| YP_859083.1    | - | - | + | - | - | - | - | - | 4.A.5.1.4 | e-82  | <a href="#">Q8FCM6</a> | 1 | putative sugar                     |
| YP_002272943.1 | - | - | - | - | - | - | + | - | 4.A.5.1.4 | e-85  | <a href="#">Q8FCM6</a> | 1 | putative sugar                     |
| YP_006107883.1 | - | + | - | + | - | + | - | - | 4.A.5.1.4 | e-88  | <a href="#">Q8FCM6</a> | 3 | putative sugar                     |
| YP_001464286.1 | - | - | - | - | + | - | - | - | 4.A.6.1.1 | e-08  | <a href="#">P69797</a> | 1 | sugar                              |
| YP_002403047.1 | + | + | + | + | + | + | + | + | 4.A.6.1.1 | e-135 | <a href="#">P69801</a> | 8 | sugar                              |
| YP_002403048.1 | + | + | + | + | + | + | + | + | 4.A.6.1.1 | e-149 | <a href="#">P69805</a> | 8 | sugar                              |
| YP_002403046.1 | + | + | + | + | + | + | + | + | 4.A.6.1.1 | e-162 | <a href="#">P69797</a> | 8 | sugar                              |

1  
2  
3  
4  
5  
6  
7  
8  
9  
10  
11  
12  
13  
14  
15  
16  
17  
18  
19  
20  
21  
22  
23  
24  
25  
26  
27  
28  
29  
30  
31  
32  
33  
34  
35  
36  
37  
38  
39  
40  
41  
42  
43  
44  
45  
46  
47  
48  
49

|                |   |   |   |   |   |   |   |   |            |       |                        |   |                 |
|----------------|---|---|---|---|---|---|---|---|------------|-------|------------------------|---|-----------------|
| YP_001464283.1 | - | - | - | - | + | - | - | - | 4.A.6.1.1  | e-46  | <a href="#">P69805</a> | 1 | sugar           |
| YP_002401262.1 | + | + | + | + | + | - | + | + | 4.A.6.1.12 | e-08  | <a href="#">Q1CY66</a> | 7 | putative sugar  |
| YP_002410905.1 | - | - | - | - | - | + | - | + | 4.A.6.1.12 | e-08  | <a href="#">Q1CY66</a> | 2 | putative sugar  |
| YP_859056.1    | - | - | + | - | - | - | - | - | 4.A.6.1.12 | e-08  | <a href="#">Q1CY66</a> | 1 | putative sugar  |
| YP_006108469.1 | - | + | + | + | - | + | + | - | 4.A.6.1.3  | e-115 | <a href="#">P37082</a> | 5 | polyol          |
| YP_006108468.1 | - | + | + | + | - | + | + | - | 4.A.6.1.3  | e-127 | <a href="#">P37083</a> | 5 | polyol          |
| YP_002273538.1 | - | - | - | - | - | - | + | - | 4.A.6.1.3  | e-52  | <a href="#">P37080</a> | 1 | polyol          |
| YP_006108471.1 | - | + | + | + | - | + | - | - | 4.A.6.1.3  | e-52  | <a href="#">P37080</a> | 4 | polyol          |
| YP_006108470.1 | - | + | + | + | - | + | - | - | 4.A.6.1.3  | e-77  | <a href="#">P37081</a> | 4 | polyol          |
| YP_002404507.1 | + | + | + | + | + | + | + | - | 4.A.6.1.4  | e-158 | <a href="#">Q9KIQ2</a> | 7 | amine           |
| YP_002404505.1 | + | + | + | + | + | + | + | + | 4.A.6.1.4  | e-86  | <a href="#">Q9KIQ4</a> | 8 | amine           |
| YP_002404506.1 | + | + | + | + | + | + | + | - | 4.A.6.1.4  | e-94  | <a href="#">Q9KIQ3</a> | 7 | amine           |
| YP_002404514.1 | + | + | + | + | + | + | + | + | 4.A.6.1.5  | e-140 | <a href="#">P42911</a> | 8 | amine           |
| YP_002404513.1 | + | + | + | + | + | + | + | - | 4.A.6.1.5  | e-150 | <a href="#">Q9KIP7</a> | 7 | amine           |
| YP_002404512.1 | + | + | + | + | + | + | + | + | 4.A.6.1.5  | e-76  | <a href="#">P42909</a> | 8 | amine           |
| YP_002404508.1 | + | + | + | + | + | + | + | - | 4.A.6.1.6  | e-16  | <a href="#">Q2QKM4</a> | 7 | sugar           |
| YP_001464285.1 | - | - | - | - | + | - | - | - | 4.A.6.1.7  | e-22  | <a href="#">Q5M5W6</a> | 1 | sugar           |
| YP_859057.1    | - | - | + | - | - | - | - | - | 4.A.6.1.7  | e-22  | <a href="#">Q5M5W6</a> | 1 | sugar           |
| YP_001464284.1 | - | - | - | - | + | - | - | - | 4.A.6.1.8  | e-27  | <a href="#">Q82ZC5</a> | 1 | monocarboxylate |
| YP_859058.1    | - | - | + | - | - | - | - | - | 4.A.6.1.8  | e-33  | <a href="#">Q82ZC5</a> | 1 | monocarboxylate |
| YP_859059.1    | - | - | + | - | - | - | - | - | 4.A.6.1.8  | e-33  | <a href="#">Q82ZC6</a> | 1 | monocarboxylate |
|                |   |   |   |   |   |   |   |   | 4.A.7.1.1  |       |                        |   | monocarboxylate |
| YP_002405610.1 | + | + | + | + | + | + | + | + | 4.A.7.1.1  | 0     | <a href="#">P39301</a> | 8 | (ascorbate)     |
| YP_002411804.1 | - | - | - | - | - | + | - | - | 4.A.7.1.1  | e-08  | <a href="#">P69822</a> | 1 | ascorbate       |
| YP_002404198.1 | + | - | - | + | + | + | + | + | 4.A.7.1.1  | e-19  | <a href="#">P69820</a> | 6 | ascorbate       |
| YP_006107219.1 | - | + | + | - | - | - | - | - | 4.A.7.1.1  | e-19  | <a href="#">P69820</a> | 2 | ascorbate       |
| YP_002405783.1 | + | + | - | + | - | - | - | - | 4.A.7.1.1  | e-27  | <a href="#">P69820</a> | 3 | ascorbate       |
| YP_002405785.1 | + | + | - | + | - | - | - | - | 4.A.7.1.1  | e-39  | <a href="#">P39301</a> | 3 | ascorbate       |
| YP_002405611.1 | + | + | - | + | - | + | + | + | 4.A.7.1.1  | e-54  | <a href="#">P69822</a> | 6 | ascorbate       |
| YP_002405612.1 | + | + | - | + | + | + | + | + | 4.A.7.1.1  | e-82  | <a href="#">P69820</a> | 7 | ascorbate       |

1  
2  
3  
4  
5  
6  
7  
8  
9  
10  
11  
12  
13  
14  
15  
16  
17  
18  
19  
20  
21  
22  
23  
24  
25  
26  
27  
28  
29  
30  
31  
32  
33  
34  
35  
36  
37  
38  
39  
40  
41  
42  
43  
44  
45  
46  
47  
48  
49

|                |   |   |   |   |   |   |   |   |           |       |                        |   |                                                     |
|----------------|---|---|---|---|---|---|---|---|-----------|-------|------------------------|---|-----------------------------------------------------|
| YP_002411803.1 | - | - | - | - | - | + | + | - | 4.A.7.1.1 | e-89  | <a href="#">P39301</a> | 2 | ascorbate                                           |
|                |   |   |   |   |   |   |   |   | 4.B.1.1.1 |       |                        |   | enzyme cofactor<br>(nicotinamide<br>ribonucleoside) |
| YP_002405893.1 | + | + | + | + | + | + | + | + |           | 0     | <a href="#">P24518</a> | 8 |                                                     |
| YP_002401835.1 | + | + | + | + | + | + | + | + | 4.B.1.1.1 | e-123 | <a href="#">P24520</a> | 8 | enzyme cofactor                                     |
| YP_006108510.1 | - | + | + | + | - | - | - | - | 4.B.1.1.1 | e-13  | <a href="#">P24518</a> | 3 | enzyme cofactor                                     |
| YP_006108509.1 | - | + | + | + | - | - | - | - | 4.B.1.1.4 | e-18  | <a href="#">Q8EDN0</a> | 3 | enzyme cofactor                                     |
| YP_002403034.1 | + | + | + | + | + | + | + | + | 4.C.1.1.4 | 0     | <a href="#">P69451</a> | 8 | lipids                                              |
| YP_006106330.1 | - | + | - | + | - | - | - | - | 4.C.1.1.4 | e-13  | <a href="#">P69451</a> | 2 | lipids                                              |
| YP_002403253.1 | + | + | + | + | - | + | - | - | 4.C.1.1.4 | e-15  | <a href="#">P69451</a> | 5 | lipids                                              |
| YP_006107376.1 | - | + | + | + | + | + | - | - | 4.C.1.1.4 | e-16  | <a href="#">P69451</a> | 5 | lipids                                              |
| YP_002401694.1 | + | + | + | + | + | + | + | + | 4.C.1.1.4 | e-19  | <a href="#">P69451</a> | 8 | lipids                                              |
| YP_006106322.1 | - | + | - | + | - | - | - | - | 4.C.1.1.4 | e-22  | <a href="#">P69451</a> | 2 | lipids                                              |
| YP_002403257.1 | + | + | + | + | - | + | - | - | 4.C.1.1.4 | e-27  | <a href="#">P69451</a> | 5 | lipids                                              |
| YP_002402930.1 | + | + | + | + | + | + | - | + | 4.C.1.1.4 | e-46  | <a href="#">P69451</a> | 7 | lipids                                              |
|                |   |   |   |   |   |   |   |   | 4.C.1.1.6 |       |                        |   | amine<br>(carnitine/crotonobetaine)                 |
| YP_002401176.1 | + | + | + | + | + | + | + | + |           | 0     | <a href="#">P31552</a> | 8 |                                                     |
| YP_006106321.1 | - | + | - | + | - | - | - | - | 4.C.1.1.6 | e-13  | <a href="#">P31552</a> | 2 | amine                                               |
| YP_002405445.1 | + | + | + | + | + | + | + | + | 4.C.1.1.6 | e-30  | <a href="#">P31552</a> | 8 | amine                                               |
| YP_002401702.1 | + | + | + | + | + | + | + | + | 4.C.1.1.6 | e-35  | <a href="#">P31552</a> | 8 | amine                                               |
| YP_002403530.1 | + | + | + | + | + | + | + | + | 4.C.1.1.7 | e-12  | <a href="#">Q42524</a> | 8 | putative lipids transport                           |
| YP_006106318.1 | - | + | - | + | - | - | - | - | 4.C.1.1.7 | e-14  | <a href="#">Q42524</a> | 2 | putative lipids transport                           |
| YP_006106324.1 | - | + | - | + | - | - | - | - | 4.C.1.1.7 | e-19  | <a href="#">Q42524</a> | 2 | putative lipids transport                           |
| YP_002401465.1 | + | + | + | + | + | + | + | + | 4.C.1.1.7 | e-28  | <a href="#">Q42524</a> | 8 | putative lipids transport                           |
|                |   |   |   |   |   |   |   |   | 4.D.1.1.2 |       |                        |   | polysaccharide<br>(hyaluronan)                      |
| YP_002271282.1 | - | - | - | - | - | - | + | - |           | e-09  | <a href="#">Q54066</a> | 1 |                                                     |
| YP_006108030.1 | - | + | + | + | + | - | - | - | 4.D.1.1.2 | e-13  | <a href="#">Q54066</a> | 4 | polysaccharide                                      |
| YP_002401492.1 | + | + | + | + | + | + | - | + | 4.D.1.1.2 | e-15  | <a href="#">Q54066</a> | 7 | polysaccharide                                      |
| YP_006106345.1 | - | + | - | - | - | - | - | + | 4.D.1.1.2 | e-16  | <a href="#">Q54066</a> | 2 | polysaccharide                                      |

1  
2  
3  
4  
5  
6  
7  
8  
9  
10  
11  
12  
13  
14  
15  
16  
17  
18  
19  
20  
21  
22  
23  
24  
25  
26  
27  
28  
29  
30  
31  
32  
33  
34  
35  
36  
37  
38  
39  
40  
41  
42  
43  
44  
45  
46  
47  
48  
49

|                |   |   |   |   |   |   |   |   |           |       |                        |   |           |
|----------------|---|---|---|---|---|---|---|---|-----------|-------|------------------------|---|-----------|
| YP_002402225.1 | + | + | + | + | + | - | + | + | 4.D.1.1.3 | 0     | <a href="#">P75905</a> | 7 | unknown   |
| YP_002411667.1 | - | - | - | - | - | + | - | - | 4.D.1.1.3 | e-08  | <a href="#">P75905</a> | 1 | unknown   |
| YP_002404910.1 | + | + | + | + | + | - | + | + | 4.D.1.1.3 | e-09  | <a href="#">P75905</a> | 7 | unknown   |
| YP_002405006.1 | + | + | + | + | + | + | - | + | 4.D.1.1.3 | e-10  | <a href="#">P75905</a> | 7 | unknown   |
| YP_002403523.1 | + | + | + | + | + | + | + | + | 4.D.2.1.6 | e-16  | <a href="#">F2KQZ0</a> | 8 | unknown   |
| YP_002401929.1 | + | + | + | + | + | + | + | + | 4.D.2.4.2 | e-52  | <a href="#">E6V6R4</a> | 8 | unknown   |
| YP_002405553.1 | + | + | + | + | + | + | + | + | 5.A.1.1.1 | 0     | <a href="#">P36655</a> | 8 | electrons |
| YP_006107450.1 | - | + | + | + | - | + | - | - | 5.A.2.1.1 | e-09  | <a href="#">P0A6M2</a> | 4 | electrons |
| YP_002402366.1 | + | + | + | + | + | + | + | + | 5.A.2.1.1 | e-75  | <a href="#">P0A6M2</a> | 8 | electrons |
| YP_002402407.1 | + | + | + | + | + | + | + | + | 5.A.3.1.1 | 0     | <a href="#">P09152</a> | 8 | electrons |
| YP_002402408.1 | + | + | + | + | + | + | + | + | 5.A.3.1.1 | 0     | <a href="#">P11349</a> | 8 | electrons |
| YP_002402410.1 | + | + | + | + | + | + | + | + | 5.A.3.1.1 | e-122 | <a href="#">P11350</a> | 8 | electrons |
| YP_002402673.1 | + | + | + | + | + | + | + | + | 5.A.3.1.2 | 0     | <a href="#">P19318</a> | 8 | electrons |
| YP_002402674.1 | + | + | + | + | + | + | + | + | 5.A.3.1.2 | 0     | <a href="#">P19319</a> | 8 | electrons |
| YP_002402671.1 | + | - | - | - | + | + | + | + | 5.A.3.1.2 | e-120 | <a href="#">P0AF32</a> | 5 | electrons |
| YP_006105786.1 | - | + | + | + | - | - | - | - | 5.A.3.1.2 | e-98  | <a href="#">P0AF32</a> | 3 | electrons |
| YP_002402679.1 | + | + | + | + | + | + | - | + | 5.A.3.2.1 | 0     | <a href="#">P24183</a> | 7 | electrons |
| YP_002405276.1 | + | + | + | + | - | + | - | + | 5.A.3.2.1 | 0     | <a href="#">P24183</a> | 6 | electrons |
| YP_002402681.1 | + | + | + | + | + | + | + | + | 5.A.3.2.1 | e-107 | <a href="#">P0AEK7</a> | 8 | electrons |
| YP_002405275.1 | + | + | + | + | + | + | + | + | 5.A.3.2.1 | e-135 | <a href="#">P0AAJ3</a> | 8 | electrons |
| YP_002402705.1 | + | + | + | + | + | + | + | + | 5.A.3.2.1 | e-16  | <a href="#">P24183</a> | 8 | electrons |
| YP_002403485.1 | + | + | + | + | + | + | + | + | 5.A.3.2.1 | e-17  | <a href="#">P24183</a> | 8 | electrons |
| YP_002402680.1 | + | + | - | + | + | + | + | + | 5.A.3.2.1 | e-172 | <a href="#">P0AAJ3</a> | 7 | electrons |
| YP_002404373.1 | + | + | + | + | + | + | + | + | 5.A.3.2.1 | e-25  | <a href="#">P0AAJ3</a> | 8 | electrons |
| YP_002405455.1 | + | + | + | + | + | + | - | + | 5.A.3.2.1 | e-42  | <a href="#">P24183</a> | 7 | electrons |
| YP_002405274.1 | + | + | + | + | + | + | + | + | 5.A.3.2.1 | e-61  | <a href="#">P0AEK7</a> | 8 | electrons |
| YP_859488.1    | - | - | + | - | - | - | - | + | 5.A.3.2.1 | e-85  | <a href="#">P24183</a> | 2 | electrons |
| YP_002402816.1 | + | + | + | + | + | + | + | + | 5.A.3.3.1 | 0     | <a href="#">P77374</a> | 8 | electrons |
| YP_002402817.1 | + | + | + | + | + | + | + | + | 5.A.3.3.1 | 0     | <a href="#">P77783</a> | 8 | electrons |
| YP_002402818.1 | + | + | + | + | + | + | + | + | 5.A.3.3.1 | e-128 | <a href="#">P0AAJ1</a> | 8 | electrons |

1  
2  
3  
4  
5  
6  
7  
8  
9  
10  
11  
12  
13  
14  
15  
16  
17  
18  
19  
20  
21  
22  
23  
24  
25  
26  
27  
28  
29  
30  
31  
32  
33  
34  
35  
36  
37  
38  
39  
40  
41  
42  
43  
44  
45  
46  
47  
48  
49

|                |   |   |   |   |   |   |   |   |            |       |                        |   |                        |
|----------------|---|---|---|---|---|---|---|---|------------|-------|------------------------|---|------------------------|
| YP_002402819.1 | + | + | + | + | + | + | + | + | 5.A.3.3.1  | e-145 | <a href="#">P76173</a> | 8 | electrons              |
| YP_002402034.1 | + | + | + | + | + | + | + | + | 5.A.3.3.2  | 0     | <a href="#">P18775</a> | 8 | electrons              |
| YP_002402035.1 | + | + | + | + | + | + | + | + | 5.A.3.3.2  | e-128 | <a href="#">P18776</a> | 8 | electrons              |
| YP_002402036.1 | + | + | + | + | + | + | + | + | 5.A.3.3.2  | e-146 | <a href="#">P18777</a> | 8 | electrons              |
| YP_002271992.1 | - | - | - | - | - | - | + | - | 5.A.3.3.2  | e-180 | <a href="#">P18775</a> | 1 | electrons              |
| YP_002271991.1 | - | - | - | - | - | - | + | - | 5.A.3.3.2  | e-62  | <a href="#">P18776</a> | 1 | electrons              |
| YP_002402198.1 | + | + | + | + | + | + | + | + | 5.A.3.4.1  | 0     | <a href="#">P33226</a> | 8 | electrons              |
| YP_002402199.1 | + | + | + | + | + | + | + | + | 5.A.3.4.1  | 0     | <a href="#">P33225</a> | 8 | electrons              |
| YP_006105129.1 | - | + | + | + | - | - | - | + | 5.A.3.4.1  | e-105 | <a href="#">P36662</a> | 4 | electrons              |
| YP_002402200.1 | + | - | - | - | + | + | + | + | 5.A.3.4.1  | e-109 | <a href="#">P36662</a> | 5 | electrons              |
| YP_002403481.1 | + | + | + | + | + | + | + | + | 5.A.3.4.1  | e-44  | <a href="#">P33226</a> | 8 | electrons              |
| YP_002403105.1 | + | + | + | + | + | + | + | + | 5.A.3.4.2  | 0     | <a href="#">P58362</a> | 8 | electrons              |
| YP_002403106.1 | + | + | + | + | + | + | + | + | 5.A.3.4.2  | 0     | <a href="#">P52005</a> | 8 | electrons              |
| YP_002404935.1 | + | + | + | + | + | + | + | + | 5.A.3.4.3  | 0     | <a href="#">P20099</a> | 8 | electrons              |
| YP_002402902.1 | + | + | + | + | + | + | + | + | 5.A.3.5.1  | e-17  | <a href="#">P0A111</a> | 8 | electrons              |
| YP_002402898.1 | + | + | + | + | + | + | + | + | 5.A.3.5.1  | e-52  | <a href="#">P37602</a> | 8 | electrons              |
| YP_002402899.1 | + | + | + | + | + | + | + | + | 5.A.3.5.1  | e-56  | <a href="#">P0A111</a> | 8 | electrons              |
| YP_859689.1    | - | - | + | - | - | - | - | + | 5.A.3.5.2  | e-11  | <a href="#">P31075</a> | 2 | electrons              |
| YP_002405449.1 | + | + | + | + | + | + | + | + | 5.A.3.5.2  | e-39  | <a href="#">P31077</a> | 8 | electrons              |
| YP_002405448.1 | + | + | + | + | + | + | + | + | 5.A.3.5.2  | e-58  | <a href="#">P31076</a> | 8 | electrons              |
| YP_002401814.1 | + | + | + | + | + | + | + | + | 3.D.10.1.1 | 0     | <a href="#">Q65GF4</a> | 8 | Cation (H+)            |
| YP_002401815.1 | + | + | + | + | + | + | + | + | 3.D.10.1.1 | e-17  | <a href="#">Q65GF5</a> | 8 | Cation (H+)            |
| YP_002405572.1 | + | + | + | + | + | + | + | + | 3.D.10.1.1 | e-24  | <a href="#">Q65GF5</a> | 8 | Cation (H+)            |
| YP_002403869.1 | + | + | + | + | + | - | + | + | 3.D.10.1.1 | e-41  | <a href="#">Q65GF4</a> | 7 | Cation (H+)            |
| YP_002405573.1 | + | + | + | + | + | + | + | + | 3.D.10.1.1 | e-74  | <a href="#">Q65GF4</a> | 8 | Cation (H+)            |
| YP_002413941.1 | - | - | - | - | - | + | - | - | 5.B.1.6.1  | e-58  | <a href="#">Q9KN15</a> | 1 | putative electron      |
| YP_002404894.1 | + | + | + | + | - | + | + | + | 5.B.3.1.1  | e-59  | <a href="#">Q74FY6</a> | 7 | electrons              |
| YP_002405447.1 | + | + | + | + | + | + | + | + | 5.B.5.1.1  | e-14  | <a href="#">Q8EG35</a> | 8 | electrons              |
| YP_002403948.1 | + | + | - | + | + | + | + | + | 8.A.1.1.1  | 0     | <a href="#">P27303</a> | 7 | nontransport auxiliary |
| YP_002405458.1 | + | + | + | + | + | + | + | + | 8.A.1.1.3  | e-149 | <a href="#">B1LPP9</a> | 8 | nontransport auxiliary |

1  
2  
3  
4  
5  
6  
7  
8  
9  
10  
11  
12  
13  
14  
15  
16  
17  
18  
19  
20  
21  
22  
23  
24  
25  
26  
27  
28  
29  
30  
31  
32  
33  
34  
35  
36  
37  
38  
39  
40  
41  
42  
43  
44  
45  
46  
47  
48  
49

|                |   |   |   |   |   |   |   |   |            |       |                        |   |                                      |
|----------------|---|---|---|---|---|---|---|---|------------|-------|------------------------|---|--------------------------------------|
| YP_002404985.1 | + | + | + | + | + | + | + | + | 8.A.1.1.3  | e-19  | <a href="#">B1LPP9</a> | 8 | nontransport auxiliary               |
| YP_002404970.1 | + | - | - | - | + | - | + | + | 8.A.1.1.3  | e-22  | <a href="#">B1LPP9</a> | 4 | nontransport auxiliary               |
| YP_006108793.1 | - | + | - | + | - | - | - | - | 8.A.1.3.1  | 0     | <a href="#">P06739</a> | 2 | nontransport auxiliary               |
| YP_002401592.1 | + | + | + | + | + | + | + | + | 8.A.1.6.1  | 0     | <a href="#">P0AE06</a> | 8 | nontransport auxiliary               |
| YP_002404631.1 | + | + | + | + | + | + | + | + | 8.A.1.6.1  | e-128 | <a href="#">P0AE06</a> | 8 | nontransport auxiliary               |
| YP_002403363.1 | + | + | + | + | + | + | + | + | 8.A.1.6.2  | 0     | <a href="#">P76397</a> | 8 | nontransport auxiliary               |
| YP_002404889.1 | + | + | + | + | + | + | + | + | 8.A.1.6.3  | 0     | <a href="#">P37636</a> | 8 | nontransport auxiliary               |
| YP_002404607.1 | + | + | + | + | + | + | + | + | 8.A.1.7.1  | e-167 | <a href="#">P46482</a> | 8 | nontransport auxiliary               |
| YP_852742.1    | - | - | + | - | - | - | - | - | 8.A.1.7.1  | e-28  | <a href="#">P46482</a> | 1 | nontransport auxiliary               |
| YP_002402874.1 | + | + | - | + | + | + | + | + | 8.A.1.7.1  | e-53  | <a href="#">P46482</a> | 7 | nontransport auxiliary               |
| YP_002401255.1 | + | + | + | + | + | + | + | + | 8.A.2.1.3  | e-62  | <a href="#">P0AA95</a> | 8 | nontransport auxiliary               |
| YP_002405591.1 | + | + | + | + | + | + | + | + | 8.A.21.2.1 | e-08  | <a href="#">O59180</a> | 8 | nontransport auxiliary               |
| YP_002405590.1 | + | + | + | + | + | + | + | + | 8.A.21.2.1 | e-09  | <a href="#">O59180</a> | 8 | nontransport auxiliary               |
| YP_002405393.1 | + | - | - | - | + | - | - | - | 8.A.21.2.1 | e-22  | <a href="#">O59180</a> | 2 | nontransport auxiliary               |
| YP_002401618.1 | + | + | + | + | + | + | + | + | 8.A.21.2.1 | e-37  | <a href="#">O59180</a> | 8 | nontransport auxiliary               |
| YP_002401445.1 | + | + | + | + | + | + | + | + | 8.A.28.1.1 | e-14  | <a href="#">Q01484</a> | 8 | nontransport auxiliary               |
| YP_002268839.1 | - | - | - | - | - | - | + | - | 8.A.28.1.1 | e-14  | <a href="#">Q01484</a> | 1 | nontransport auxiliary               |
| YP_002402181.1 | + | - | - | - | + | - | + | + | 8.A.3.3.1  | 0     | <a href="#">P38134</a> | 4 | nontransport auxiliary               |
| YP_002403350.1 | + | + | + | + | + | + | + | + | 8.A.3.3.2  | 0     | <a href="#">P76387</a> | 8 | nontransport auxiliary               |
| YP_006107340.1 | - | + | + | + | - | + | - | - | 8.A.4.1.1  | 0     | <a href="#">P42501</a> | 4 | nontransport auxiliary               |
| YP_002401546.1 | + | + | + | + | + | + | + | + | 8.A.5.1.3  | e-39  | <a href="#">P63144</a> | 8 | nontransport subunit                 |
| YP_002404378.1 | + | + | + | + | + | + | + | + | 8.A.5.1.3  | e-43  | <a href="#">P63144</a> | 8 | nontransport subunit                 |
| YP_006104526.1 | - | + | + | + | + | + | + | - | 8.A.5.1.4  | e-09  | <a href="#">P80874</a> | 6 | nontransport subunit                 |
| YP_002415593.1 | - | - | - | - | - | + | - | - | 8.A.5.1.4  | e-11  | <a href="#">P80874</a> | 1 | nontransport subunit                 |
| YP_002404388.1 | + | + | + | + | + | + | + | + | 8.A.5.1.4  | e-15  | <a href="#">P80874</a> | 8 | nontransport subunit                 |
| YP_002401335.1 | + | + | + | + | + | + | + | + | 8.A.5.1.4  | e-16  | <a href="#">P80874</a> | 8 | nontransport subunit                 |
|                |   |   |   |   |   |   |   |   | 8.A.5.1.4  |       |                        |   | putative auxiliary<br>(nontransport) |
| YP_006104523.1 | - | + | + | + | - | + | + | - | 8.A.5.1.4  | e-17  | <a href="#">P80874</a> | 5 |                                      |
| YP_002402877.1 | + | + | + | + | + | + | - | + | 8.A.5.1.4  | e-18  | <a href="#">P80874</a> | 7 | putative auxiliary                   |
| YP_002412506.1 | - | - | - | - | - | + | - | - | 8.A.5.1.4  | e-21  | <a href="#">P80874</a> | 1 | putative auxiliary                   |

1  
2  
3  
4  
5  
6  
7  
8  
9  
10  
11  
12  
13  
14  
15  
16  
17  
18  
19  
20  
21  
22  
23  
24  
25  
26  
27  
28  
29  
30  
31  
32  
33  
34  
35  
36  
37  
38  
39  
40  
41  
42  
43  
44  
45  
46  
47  
48  
49

|                |   |   |   |   |   |   |   |   |            |       |                        |   |                          |
|----------------|---|---|---|---|---|---|---|---|------------|-------|------------------------|---|--------------------------|
| YP_002403007.1 | + | + | + | + | + | + | + | + | 8.A.5.1.4  | e-23  | <a href="#">P80874</a> | 8 | putative auxiliary       |
| YP_002404097.1 | + | + | + | + | + | + | + | + | 8.A.5.1.4  | e-27  | <a href="#">P80874</a> | 8 | putative auxiliary       |
| YP_002412501.1 | - | - | - | - | - | + | - | - | 8.A.5.1.4  | e-28  | <a href="#">P80874</a> | 1 | putative auxiliary       |
| YP_006104522.1 | - | + | + | + | - | + | - | - | 8.A.5.1.4  | e-37  | <a href="#">P80874</a> | 4 | putative auxiliary       |
| YP_002402997.1 | + | + | + | + | + | + | + | + | 8.A.5.1.4  | e-47  | <a href="#">P80874</a> | 8 | putative auxiliary       |
| YP_002403719.1 | + | + | + | + | + | + | + | + | 8.A.7.1.1  | 0     | <a href="#">P08839</a> | 8 | putative auxiliary       |
| YP_002402379.1 | + | + | + | + | + | + | - | + | 8.A.7.1.3  | e-12  | <a href="#">D2RXA5</a> | 7 | putative auxiliary       |
| YP_002404092.1 | + | + | + | + | + | + | + | + | 8.A.7.1.3  | e-84  | <a href="#">D2RXA5</a> | 8 | putative auxiliary       |
| YP_006108870.1 | - | + | + | + | - | - | - | - | 8.A.7.1.4  | e-26  | <a href="#">D4GYE2</a> | 3 | putative auxiliary       |
| YP_002402931.1 | + | + | + | + | + | + | + | + | 8.A.7.1.4  | e-36  | <a href="#">D4GYE2</a> | 8 | putative auxiliary       |
| YP_002403718.1 | + | + | - | + | + | + | + | + | 8.A.8.1.1  | e-42  | <a href="#">P0AA04</a> | 7 | putative auxiliary       |
| YP_002401531.1 | + | + | + | + | + | + | + | + | 8.A.9.1.1  | e-15  | <a href="#">Q05839</a> | 8 | nontransport auxiliary   |
| YP_002405656.1 | + | + | + | + | + | + | + | + | 8.A.9.1.1  | e-69  | <a href="#">Q05839</a> | 8 | nontransport auxiliary   |
| YP_002401691.1 | + | + | + | + | + | + | + | + | 8.B.14.1.2 | 0     | <a href="#">P05825</a> | 8 | putative auxiliary       |
| YP_002404843.1 | + | - | - | - | - | - | - | - | 9.A.10.1.5 | e-26  | <a href="#">Q09920</a> | 1 | cation (ferric)          |
| YP_002402220.1 | + | + | + | + | + | + | + | + | 9.A.10.2.3 | 0     | <a href="#">P0AB24</a> | 8 | cation (lead)            |
| YP_002402221.1 | + | + | + | + | + | + | + | + | 9.A.10.2.3 | 0     | <a href="#">P31545</a> | 8 | cation (lead)            |
| YP_002402219.1 | + | + | + | + | + | + | + | - | 9.A.10.2.3 | e-132 | <a href="#">P75901</a> | 7 | cation (lead)            |
| YP_002271817.1 | - | - | - | - | - | - | + | - | 9.A.15.1.1 | e-11  | <a href="#">P53104</a> | 1 | nontransport             |
| YP_002401503.1 | + | + | + | + | + | + | + | + | 9.A.18.1.1 | 0     | <a href="#">P0AFY6</a> | 8 | peptide (microcin)       |
| YP_002403745.1 | + | + | + | + | + | + | + | + | 9.A.28.1.1 | 0     | <a href="#">P41796</a> | 8 | amine                    |
| YP_002269831.1 | - | - | - | - | - | - | + | - | 9.A.30.1.1 | 0     | <a href="#">Q7B1W8</a> | 1 | anion                    |
| YP_002404459.1 | + | + | + | + | + | + | + | + | 9.A.30.1.2 | e-90  | <a href="#">F0N2E7</a> | 8 | putative anion transport |
| YP_001463282.1 | - | - | - | - | + | - | - | - | 9.A.33.1.1 | e-13  | <a href="#">Q9KW03</a> | 1 | nontransport             |
| YP_852021.1    | - | - | + | - | - | - | - | - | 9.A.33.1.1 | e-26  | <a href="#">Q9KW03</a> | 1 | nontransport             |
| NP_752898.1    | - | - | - | + | - | - | - | - | 9.A.33.1.1 | e-31  | <a href="#">Q9KW03</a> | 1 | nontransport             |
| YP_002271335.1 | - | - | - | - | - | - | + | - | 9.A.33.1.1 | e-33  | <a href="#">Q9KW03</a> | 1 | nontransport             |
| YP_002401352.1 | + | - | - | - | + | - | + | - | 3.A.23.1.1 | 0     | <a href="#">Q9KN49</a> | 3 | protein                  |
| YP_851415.1    | - | - | + | - | - | + | - | - | 3.A.23.1.1 | 0     | <a href="#">Q9KN45</a> | 2 | protein                  |

1  
2  
3  
4  
5  
6  
7  
8  
9  
10  
11  
12  
13  
14  
15  
16  
17  
18  
19  
20  
21  
22  
23  
24  
25  
26  
27  
28  
29  
30  
31  
32  
33  
34  
35  
36  
37  
38  
39  
40  
41  
42  
43  
44  
45  
46  
47  
48  
49

|                |   |   |   |   |   |   |   |   |            |       |                        |   |         |
|----------------|---|---|---|---|---|---|---|---|------------|-------|------------------------|---|---------|
| YP_002410990.1 | - | - | - | - | - | + | - | - | 3.A.23.1.1 | 0     | <a href="#">Q9KN49</a> | 1 | protein |
| YP_002401349.1 | + | - | - | - | + | - | - | - | 3.A.23.1.1 | 0     | <a href="#">Q9KN45</a> | 2 | protein |
| YP_851418.1    | - | - | + | - | - | - | - | - | 3.A.23.1.1 | 0     | <a href="#">Q9KN49</a> | 1 | protein |
| YP_006107110.1 | - | + | + | + | + | - | - | - | 3.A.23.1.1 | e-08  | <a href="#">Q9KN44</a> | 4 | protein |
| YP_002401348.1 | + | - | - | - | + | - | + | - | 3.A.23.1.1 | e-09  | <a href="#">Q9KN44</a> | 3 | protein |
| YP_006107095.1 | - | + | + | + | + | - | - | - | 3.A.23.1.1 | e-10  | <a href="#">Q9KN50</a> | 4 | protein |
| YP_851420.1    | - | - | + | - | - | + | - | - | 3.A.23.1.1 | e-101 | <a href="#">Q9KN51</a> | 2 | protein |
| YP_002401365.1 | + | - | - | - | + | - | + | - | 3.A.23.1.1 | e-104 | <a href="#">B2D7K2</a> | 3 | protein |
| YP_002401354.1 | + | - | - | - | + | - | + | - | 3.A.23.1.1 | e-106 | <a href="#">Q9KN51</a> | 3 | protein |
| YP_002402664.1 | + | - | - | - | + | - | + | - | 3.A.23.1.1 | e-107 | <a href="#">B2D7K2</a> | 3 | protein |
| YP_002410986.1 | - | - | - | - | - | + | - | - | 3.A.23.1.1 | e-11  | <a href="#">Q9KN44</a> | 1 | protein |
| YP_006107107.1 | - | + | + | - | - | - | - | - | 3.A.23.1.1 | e-11  | <a href="#">Q9KN54</a> | 2 | protein |
| YP_851414.1    | - | - | + | - | - | - | - | - | 3.A.23.1.1 | e-11  | <a href="#">Q9KN44</a> | 1 | protein |
| YP_002404292.1 | + | - | - | - | - | - | - | - | 3.A.23.1.1 | e-11  | <a href="#">Q9KN45</a> | 1 | protein |
| YP_002401676.1 | + | - | - | - | + | - | + | - | 3.A.23.1.1 | e-110 | <a href="#">B2D7K2</a> | 3 | protein |
| YP_851429.1    | - | - | + | - | - | - | - | - | 3.A.23.1.1 | e-115 | <a href="#">B2D7K2</a> | 1 | protein |
| YP_854041.1    | - | - | + | - | - | - | - | - | 3.A.23.1.1 | e-12  | <a href="#">Q9KN45</a> | 1 | protein |
| YP_006105771.1 | - | + | - | + | - | + | - | - | 3.A.23.1.1 | e-123 | <a href="#">B2D7K2</a> | 3 | protein |
| YP_852610.1    | - | - | + | - | - | + | - | - | 3.A.23.1.1 | e-123 | <a href="#">B2D7K2</a> | 2 | protein |
| YP_006105776.1 | - | + | - | + | - | - | - | - | 3.A.23.1.1 | e-125 | <a href="#">B2D7K2</a> | 2 | protein |
| YP_851424.1    | - | - | + | - | - | + | - | - | 3.A.23.1.1 | e-128 | <a href="#">Q9KN55</a> | 2 | protein |
| YP_006107104.1 | - | + | - | + | - | - | - | - | 3.A.23.1.1 | e-13  | <a href="#">Q9KN45</a> | 2 | protein |
| YP_002401358.1 | + | - | - | - | + | - | + | - | 3.A.23.1.1 | e-135 | <a href="#">Q9KN55</a> | 3 | protein |
| YP_001461389.1 | - | - | - | - | + | - | + | - | 3.A.23.1.1 | e-14  | <a href="#">Q9KN47</a> | 2 | protein |
| YP_002410989.1 | - | - | - | - | - | + | - | - | 3.A.23.1.1 | e-14  | <a href="#">Q9KN47</a> | 1 | protein |
| YP_851417.1    | - | - | + | - | - | - | - | - | 3.A.23.1.1 | e-14  | <a href="#">Q9KN47</a> | 1 | protein |
| YP_859967.1    | - | - | + | - | - | - | - | - | 3.A.23.1.1 | e-15  | <a href="#">Q9KN48</a> | 1 | protein |
| YP_002401351.1 | + | - | - | - | - | - | - | - | 3.A.23.1.1 | e-15  | <a href="#">Q9KN47</a> | 1 | protein |
| YP_002401355.1 | + | - | - | - | + | - | + | - | 3.A.23.1.1 | e-19  | <a href="#">Q9KN52</a> | 3 | protein |
| YP_851421.1    | - | - | + | - | - | + | - | - | 3.A.23.1.1 | e-19  | <a href="#">Q9KN52</a> | 2 | protein |



1  
2  
3  
4  
5  
6  
7  
8  
9  
10  
11  
12  
13  
14  
15  
16  
17  
18  
19  
20  
21  
22  
23  
24  
25  
26  
27  
28  
29  
30  
31  
32  
33  
34  
35  
36  
37  
38  
39  
40  
41  
42  
43  
44  
45  
46  
47  
48  
49

|    |                |   |   |   |   |   |   |   |   |            |      |                        |   |         |
|----|----------------|---|---|---|---|---|---|---|---|------------|------|------------------------|---|---------|
| 4  | YP_002404288.1 | + | - | - | - | - | - | - | - | 3.A.23.1.1 | e-19 | <a href="#">Q9KN54</a> | 1 | protein |
| 5  | YP_001464287.1 | - | - | - | - | + | - | - | - | 3.A.23.1.1 | e-20 | <a href="#">Q9KN48</a> | 1 | protein |
| 6  | YP_002402382.1 | + | + | + | + | + | + | - | + | 3.A.23.1.1 | e-23 | <a href="#">Q9KN48</a> | 7 | protein |
| 7  | YP_002404298.1 | + | - | - | - | - | - | - | - | 3.A.23.1.1 | e-27 | <a href="#">B2D7K2</a> | 1 | protein |
| 8  | YP_006107094.1 | - | + | + | + | + | - | - | - | 3.A.23.1.1 | e-32 | <a href="#">Q9KN51</a> | 4 | protein |
| 9  | YP_002404771.1 | + | + | + | + | + | + | + | + | 3.A.23.1.1 | e-33 | <a href="#">Q9KN48</a> | 8 | protein |
| 10 | YP_002404304.1 | + | - | - | - | - | - | - | - | 3.A.23.1.1 | e-37 | <a href="#">Q9KN51</a> | 1 | protein |
| 11 | YP_002402565.1 | + | + | + | + | + | + | + | + | 3.A.23.1.1 | e-41 | <a href="#">Q9KN48</a> | 8 | protein |
| 12 | YP_851422.1    | - | - | + | - | - | + | - | - | 3.A.23.1.1 | e-41 | <a href="#">Q9KN53</a> | 2 | protein |
| 13 | YP_002402546.1 | + | + | + | + | + | + | + | + | 3.A.23.1.1 | e-44 | <a href="#">Q9KN48</a> | 8 | protein |
| 14 | YP_002401353.1 | + | - | - | - | + | - | + | - | 3.A.23.1.1 | e-45 | <a href="#">Q9KN50</a> | 3 | protein |
| 15 | YP_002401356.1 | + | - | - | - | + | - | + | - | 3.A.23.1.1 | e-45 | <a href="#">Q9KN53</a> | 3 | protein |
| 16 | YP_851419.1    | - | - | + | - | - | + | - | - | 3.A.23.1.1 | e-47 | <a href="#">Q9KN50</a> | 2 | protein |
| 17 | YP_006108519.1 | - | + | + | + | - | - | - | - | 3.A.23.1.1 | e-47 | <a href="#">Q9KN48</a> | 3 | protein |
| 18 | YP_002405248.1 | + | + | + | + | + | + | + | + | 3.A.23.1.1 | e-48 | <a href="#">Q9KN48</a> | 8 | protein |
| 19 | YP_002403967.1 | + | + | + | + | + | + | + | + | 3.A.23.1.1 | e-49 | <a href="#">Q9KN48</a> | 8 | protein |
| 20 | YP_002401461.1 | + | + | + | + | + | + | + | + | 3.A.23.1.1 | e-50 | <a href="#">Q9KN48</a> | 8 | protein |
| 21 | YP_851416.1    | - | - | + | - | - | + | - | - | 3.A.23.1.1 | e-50 | <a href="#">Q9KN46</a> | 2 | protein |
| 22 | YP_002403992.1 | + | + | + | + | + | + | + | + | 3.A.23.1.1 | e-51 | <a href="#">Q9KN48</a> | 8 | protein |
| 23 | YP_002403785.1 | + | - | - | - | + | + | + | + | 3.A.23.1.1 | e-52 | <a href="#">Q9KN48</a> | 5 | protein |
| 24 | YP_002411028.1 | - | - | - | - | - | + | - | - | 3.A.23.1.1 | e-53 | <a href="#">Q9KN48</a> | 1 | protein |
| 25 | YP_002405379.1 | + | + | + | + | + | + | + | + | 3.A.23.1.1 | e-56 | <a href="#">Q9KN48</a> | 8 | protein |
| 26 | YP_002401350.1 | + | - | - | - | - | - | - | - | 3.A.23.1.1 | e-56 | <a href="#">Q9KN46</a> | 1 | protein |
| 27 | YP_002268822.1 | - | - | - | - | - | - | + | - | 3.A.23.1.1 | e-57 | <a href="#">Q9KN46</a> | 1 | protein |
| 28 | YP_006106593.1 | - | + | + | + | - | + | - | + | 3.A.23.1.1 | e-58 | <a href="#">Q9KN48</a> | 5 | protein |
| 29 | YP_002403848.1 | + | + | + | + | + | + | + | + | 3.A.23.1.1 | e-59 | <a href="#">Q9KN48</a> | 8 | protein |
| 30 | YP_001461388.1 | - | - | - | - | + | - | - | - | 3.A.23.1.1 | e-60 | <a href="#">Q9KN46</a> | 1 | protein |
| 31 | YP_002404132.1 | + | + | + | + | + | + | + | + | 3.A.23.1.1 | e-61 | <a href="#">Q9KN48</a> | 8 | protein |
| 32 | YP_002401357.1 | + | - | - | - | + | - | + | - | 3.A.23.1.1 | e-64 | <a href="#">Q9KN54</a> | 3 | protein |
| 33 | YP_851423.1    | - | - | + | - | - | + | - | - | 3.A.23.1.1 | e-64 | <a href="#">Q9KN54</a> | 2 | protein |

1  
2  
3  
4  
5  
6  
7  
8  
9  
10  
11  
12  
13  
14  
15  
16  
17  
18  
19  
20  
21  
22  
23  
24  
25  
26  
27  
28  
29  
30  
31  
32  
33  
34  
35  
36  
37  
38  
39  
40  
41  
42  
43  
44  
45  
46  
47  
48  
49

|    |                |   |   |   |   |   |   |   |   |            |       |        |   |         |
|----|----------------|---|---|---|---|---|---|---|---|------------|-------|--------|---|---------|
| 4  | YP_002402023.1 | + | + | + | + | + | + | + | + | 3.A.23.1.1 | e-69  | Q9KN49 | 8 | protein |
| 5  | YP_006107106.1 | - | + | + | + | - | - | - | - | 3.A.23.1.1 | e-76  | Q9KN55 | 3 | protein |
| 6  | YP_002404289.1 | + | - | - | - | - | - | - | - | 3.A.23.1.1 | e-78  | Q9KN55 | 1 | protein |
| 7  | YP_006107098.1 | - | + | + | + | + | - | - | - | 3.A.23.2.1 | 0     | Q6EE14 | 4 | protein |
| 8  | YP_002404252.1 | + | - | - | - | - | - | - | - | 3.A.23.2.1 | 0     | Q6EE14 | 1 | protein |
| 9  | YP_002404300.1 | + | - | - | - | - | - | - | - | 3.A.23.2.1 | 0     | Q6EE14 | 1 | protein |
| 10 | YP_002404303.1 | + | - | - | - | - | - | - | - | 3.A.23.2.1 | e-10  | A8YQS0 | 1 | protein |
| 11 | YP_851426.1    | - | - | + | - | - | + | - | - | 3.A.23.2.1 | e-101 | Q6EE20 | 2 | protein |
| 12 | YP_002401360.1 | + | - | - | - | + | - | - | - | 3.A.23.2.1 | e-106 | Q6EE20 | 2 | protein |
| 13 | YP_006107093.1 | - | + | + | + | + | - | - | - | 3.A.23.2.1 | e-107 | Q6EE20 | 4 | protein |
| 14 | YP_002404305.1 | + | - | - | - | - | - | - | - | 3.A.23.2.1 | e-107 | Q6EE20 | 1 | protein |
| 15 | YP_002404254.1 | + | - | - | - | - | - | - | - | 3.A.23.2.1 | e-12  | A8YQS0 | 1 | protein |
| 16 | YP_002404257.1 | + | - | - | - | - | - | - | - | 3.A.23.2.1 | e-13  | A8YQR8 | 1 | protein |
| 17 | YP_002403884.1 | + | + | + | + | + | + | + | + | 3.A.23.2.1 | e-144 | Q6EE14 | 8 | protein |
| 18 | YP_002401362.1 | + | - | - | - | + | - | + | - | 3.A.23.2.1 | e-15  | Q6EE21 | 3 | protein |
| 19 | YP_002404266.1 | + | - | - | - | - | - | - | - | 3.A.23.2.1 | e-166 | Q6EE20 | 1 | protein |
| 20 | YP_002404259.1 | + | - | - | - | - | - | - | - | 3.A.23.2.1 | e-17  | A8YQR6 | 1 | protein |
| 21 | YP_006107092.1 | - | + | + | + | + | - | - | - | 3.A.23.2.1 | e-20  | Q6EE21 | 4 | protein |
| 22 | YP_002404253.1 | + | - | - | - | - | - | - | - | 3.A.23.2.1 | e-20  | A8YQS1 | 1 | protein |
| 23 | YP_002404262.1 | + | - | - | - | - | - | - | - | 3.A.23.2.1 | e-22  | Q6EE15 | 1 | protein |
| 24 | YP_002404306.1 | + | - | - | - | - | - | - | - | 3.A.23.2.1 | e-23  | Q6EE21 | 1 | protein |
| 25 | YP_002404267.1 | + | - | - | - | - | - | - | - | 3.A.23.2.1 | e-32  | Q6EE21 | 1 | protein |
| 26 | YP_001464145.1 | - | - | - | - | + | - | - | - | 3.A.23.2.1 | e-34  | A8YQR5 | 1 | protein |
| 27 | YP_006107099.1 | - | + | - | + | - | - | - | - | 3.A.23.2.1 | e-35  | A8YQR5 | 2 | protein |
| 28 | YP_002404256.1 | + | - | - | - | - | - | - | - | 3.A.23.2.1 | e-35  | A8YQR9 | 1 | protein |
| 29 | YP_854036.1    | - | - | + | - | - | - | - | - | 3.A.23.2.1 | e-36  | A8YQR5 | 1 | protein |
| 30 | YP_002404258.1 | + | - | - | - | - | - | - | - | 3.A.23.2.1 | e-36  | A8YQR7 | 1 | protein |
| 31 | YP_002404263.1 | + | - | - | - | - | - | - | - | 3.A.23.2.1 | e-61  | Q6EE16 | 1 | protein |
| 32 | YP_002404261.1 | + | - | - | - | - | - | - | - | 3.A.23.2.1 | e-69  | A8YQR5 | 1 | protein |
| 33 | YP_002404217.1 | + | + | + | + | + | + | + | + | 9.A.4.1.2  | e-86  | P64564 | 8 | unknown |

1  
2  
3  
4  
5  
6  
7  
8  
9  
10  
11  
12  
13  
14  
15  
16  
17  
18  
19  
20  
21  
22  
23  
24  
25  
26  
27  
28  
29  
30  
31  
32  
33  
34  
35  
36  
37  
38  
39  
40  
41  
42  
43  
44  
45  
46  
47  
48  
49

|                |   |   |   |   |   |   |   |   |             |       |                        |   |                           |
|----------------|---|---|---|---|---|---|---|---|-------------|-------|------------------------|---|---------------------------|
| YP_002403353.1 | + | + | + | + | + | + | + | + | 9.A.40.1.1  | e-30  | <a href="#">Q54318</a> | 8 | putative transporter      |
| YP_002401764.1 | + | + | + | + | + | + | + | + | 9.A.40.1.2  | e-153 | <a href="#">P0A2L3</a> | 8 | putative transporter      |
| YP_002403045.1 | + | + | + | + | + | + | + | + | 9.A.40.1.2  | e-22  | <a href="#">P0A2L3</a> | 8 | putative transporter      |
| YP_002403903.1 | + | + | + | + | + | + | - | + | 9.A.40.2.1  | e-29  | <a href="#">P54428</a> | 7 | putative transporter      |
| YP_002405637.1 | + | + | + | + | + | + | + | + | 9.A.40.2.1  | e-32  | <a href="#">P54428</a> | 8 | putative transporter      |
| YP_002403820.1 | + | + | + | + | + | + | + | + | 9.A.41.1.1  | 0     | <a href="#">P44669</a> | 8 | polysaccharide            |
| YP_002404617.1 | + | + | + | + | + | + | + | + | 9.A.41.1.1  | e-10  | <a href="#">P44669</a> | 8 | polysaccharide            |
| YP_006107343.1 | - | + | + | + | - | + | - | - | 9.A.41.1.2  | 0     | <a href="#">P42217</a> | 4 | polysaccharide            |
| YP_006107344.1 | - | + | + | + | - | + | - | - | 9.A.41.1.3  | 0     | <a href="#">P42218</a> | 4 | polysaccharide            |
| YP_002405841.1 | + | + | + | + | + | + | + | + | 9.A.5.4.1   | e-48  | <a href="#">D2YRH2</a> | 8 | unknown                   |
| YP_002404759.1 | + | + | + | + | + | + | + | + | 9.A.8.1.1   | 0     | <a href="#">P33650</a> | 8 | cation (ferrous)          |
| YP_002403805.1 | + | + | + | + | + | + | + | + | 9.A.8.1.9   | e-08  | <a href="#">Q57986</a> | 8 | cation (ferrous)          |
| YP_002403455.1 | + | + | + | + | + | + | + | + | 9.B.10.1.1  | e-10  | <a href="#">P94400</a> | 8 | cation (zinc)             |
| YP_002405857.1 | + | + | + | + | + | + | + | + | 9.B.10.1.1  | e-20  | <a href="#">P94400</a> | 8 | cation (zinc)             |
| YP_006105318.1 | - | + | - | + | - | - | - | - | 9.B.10.1.1  | e-26  | <a href="#">P94400</a> | 2 | cation (zinc)             |
| YP_002403203.1 | + | + | + | + | + | + | + | + | 9.B.102.1.1 | 0     | <a href="#">P31064</a> | 8 | putative transporter      |
| YP_002403305.1 | + | - | + | - | + | - | + | + | 9.B.102.1.2 | 0     | <a href="#">P33015</a> | 5 | putative transporter      |
| YP_002402982.1 | + | + | + | + | + | + | + | + | 9.B.102.4.1 | e-12  | <a href="#">A0LFK9</a> | 8 | putative transporter      |
| YP_002403815.1 | + | + | + | + | + | + | + | + | 9.B.102.4.1 | e-17  | <a href="#">A0LFK9</a> | 8 | putative transporter      |
| YP_002404773.1 | + | + | + | + | + | + | + | + | 9.B.104.1.1 | e-162 | <a href="#">P09391</a> | 8 | putative protein cleavage |
| YP_002401165.1 | + | + | + | + | + | + | + | + | 9.B.105.1.1 | e-22  | <a href="#">Q58AJ7</a> | 8 | cation (Pb)               |
| YP_002401982.1 | + | + | + | + | + | + | + | + | 9.B.105.1.3 | e-12  | <a href="#">P94571</a> | 8 | unknown                   |
| YP_002403422.1 | + | + | + | + | + | + | + | + | 9.B.114.1.1 | e-126 | <a href="#">P0AFY2</a> | 8 | unknown                   |
| YP_002404457.1 | + | + | + | + | + | + | - | + | 9.B.114.1.1 | e-31  | <a href="#">P0AFY2</a> | 7 | unknown                   |
| YP_002272559.1 | - | - | - | - | - | - | + | - | 9.B.114.1.1 | e-32  | <a href="#">P0AFY2</a> | 1 | unknown                   |
| YP_002403420.1 | + | + | + | + | + | + | + | + | 9.B.117.1.1 | e-116 | <a href="#">C6EAH0</a> | 8 | auxiliary                 |
| YP_006108536.1 | - | + | + | + | - | - | - | - | 9.B.117.1.1 | e-12  | <a href="#">C6EAH0</a> | 3 | auxiliary                 |
| YP_002404724.1 | + | + | + | + | + | + | - | + | 9.B.118.1.1 | 0     | <a href="#">P45546</a> | 7 | unknown                   |
| YP_002403930.1 | + | + | - | + | + | + | + | + | 9.B.12.2.1  | e-26  | <a href="#">P0AE42</a> | 7 | unknown                   |

1  
2  
3  
4  
5  
6  
7  
8  
9  
10  
11  
12  
13  
14  
15  
16  
17  
18  
19  
20  
21  
22  
23  
24  
25  
26  
27  
28  
29  
30  
31  
32  
33  
34  
35  
36  
37  
38  
39  
40  
41  
42  
43  
44  
45  
46  
47  
48  
49

|                |   |   |   |   |   |   |   |   |             |       |                        |   |                           |
|----------------|---|---|---|---|---|---|---|---|-------------|-------|------------------------|---|---------------------------|
| YP_002404231.1 | + | + | + | + | + | + | + | + | 9.B.120.1.1 | e-114 | <a href="#">Q46831</a> | 8 | unknown                   |
| YP_002404900.1 | + | + | + | + | + | + | + | + | 9.B.121.1.1 | 0     | <a href="#">P37645</a> | 8 | unknown                   |
| YP_002402322.1 | + | - | - | - | + | - | - | - | 9.B.122.1.1 | e-63  | <a href="#">P75962</a> | 2 | unknown                   |
| YP_006105429.1 | - | + | + | + | - | + | - | + | 9.B.122.1.1 | e-65  | <a href="#">P75962</a> | 5 | unknown                   |
| YP_002272577.1 | - | - | - | - | - | - | + | + | 9.B.124.1.1 | e-48  | <a href="#">P64592</a> | 2 | unknown                   |
| YP_002404479.1 | + | - | - | - | + | + | - | - | 9.B.124.1.1 | e-49  | <a href="#">P64592</a> | 3 | unknown                   |
| YP_002404478.1 | + | + | + | + | + | + | + | + | 9.B.124.1.2 | e-71  | <a href="#">P64591</a> | 8 | unknown                   |
| YP_006104179.1 | - | + | + | + | - | - | - | - | 9.B.124.1.4 | e-10  | <a href="#">G2GUD4</a> | 3 | unknown                   |
| YP_002401244.1 | + | + | + | + | + | + | + | + | 9.B.125.1.1 | e-158 | <a href="#">P0AE14</a> | 8 | unknown                   |
| YP_002404898.1 | + | + | + | + | + | + | + | + | 9.B.126.1.1 | 0     | <a href="#">P37642</a> | 8 | lipids                    |
| YP_002405265.1 | + | + | + | + | + | + | + | + | 9.B.126.2.1 | e-136 | <a href="#">P0A8K8</a> | 8 | putative lipids transport |
| YP_002403735.1 | + | + | + | + | + | + | + | + | 9.B.127.1.1 | e-66  | <a href="#">P76538</a> | 8 | unknown                   |
| YP_002405179.1 | + | + | + | + | + | + | + | + | 9.B.128.1.1 | 0     | <a href="#">B6I4D1</a> | 8 | putative transporter      |
| YP_002403475.1 | + | + | + | + | + | + | + | + | 9.B.14.1.3  | 0     | <a href="#">P33927</a> | 8 | putative transporter      |
| YP_002405450.1 | + | + | + | + | + | + | + | + | 9.B.14.1.3  | e-56  | <a href="#">P33927</a> | 8 | putative transporter      |
| YP_002403478.1 | + | + | + | + | + | + | + | + | 9.B.14.2.3  | e-145 | <a href="#">P0ABM1</a> | 8 | siderophore               |
| YP_002401932.1 | + | + | + | + | + | + | + | + | 9.B.15.1.1  | e-61  | <a href="#">P0AAW6</a> | 8 | unknown                   |
| YP_002401535.1 | + | + | + | + | + | + | + | + | 9.B.18.1.1  | e-57  | <a href="#">P0ADZ7</a> | 8 | unknown                   |
| YP_002404884.1 | + | + | + | + | + | + | + | + | 9.B.20.2.1  | e-20  | <a href="#">Q55026</a> | 8 | cation (Mg 2+)            |
| YP_002405188.1 | + | + | + | + | + | + | + | + | 9.B.21.2.1  | e-61  | <a href="#">P27838</a> | 8 | unknown                   |
| YP_002405640.1 | + | + | + | + | + | + | + | + | 9.B.22.1.1  | 0     | <a href="#">Q4JI69</a> | 8 | protein (leukotoxin)      |
| YP_002402975.1 | + | + | + | + | + | + | + | + | 9.B.27.1.1  | e-101 | <a href="#">P76219</a> | 8 | putative anion transport  |
| YP_002402977.1 | + | + | + | + | + | + | + | + | 9.B.27.1.2  | e-120 | <a href="#">P76221</a> | 8 | putative anion transport  |
| YP_002404385.1 | + | + | + | + | + | + | + | + | 9.B.27.2.1  | e-102 | <a href="#">P0AA60</a> | 8 | unknown                   |
| YP_002401202.1 | + | + | + | + | + | + | + | + | 9.B.27.2.2  | e-12  | <a href="#">P0AA63</a> | 8 | unknown                   |
| YP_002404470.1 | + | + | + | + | + | + | + | + | 9.B.27.2.2  | e-118 | <a href="#">P0AA63</a> | 8 | unknown                   |
| YP_002271726.1 | - | - | - | - | - | - | + | + | 9.B.27.2.3  | e-107 | <a href="#">P0ABP6</a> | 2 | unknown                   |
| YP_002403583.1 | + | + | + | + | + | + | - | - | 9.B.27.2.3  | e-113 | <a href="#">P0ABP6</a> | 6 | putative anion            |

1  
2  
3  
4  
5  
6  
7  
8  
9  
10  
11  
12  
13  
14  
15  
16  
17  
18  
19  
20  
21  
22  
23  
24  
25  
26  
27  
28  
29  
30  
31  
32  
33  
34  
35  
36  
37  
38  
39  
40  
41  
42  
43  
44  
45  
46  
47  
48  
49

|                |   |   |   |   |   |   |   |   |                    |       |                        |   |                               |
|----------------|---|---|---|---|---|---|---|---|--------------------|-------|------------------------|---|-------------------------------|
| YP_002414644.1 | - | - | - | - | - | + | - | - | <b>9.B.28.1.1</b>  | e-45  | <a href="#">B5LWZ8</a> | 1 | putative transporter          |
| YP_002404880.1 | + | - | - | - | + | - | - | - | <b>9.B.28.1.1</b>  | e-47  | <a href="#">B5LWZ8</a> | 2 | putative transporter          |
| YP_002404525.1 | + | + | + | + | - | + | + | + | <b>9.B.28.1.2</b>  | e-09  | <a href="#">A8VTI4</a> | 7 | putative transporter          |
| YP_002403051.1 | + | + | + | + | + | + | + | + | <b>2.A.207.1.1</b> | e-95  | <a href="#">P76264</a> | 8 | cation (Mg 2+)                |
| YP_002404162.1 | + | + | + | + | + | + | + | + | 9.B.30.1.1         | e-44  | P54176                 | 8 | unknown                       |
| YP_002404431.1 | + | + | + | + | + | + | + | + | <b>9.B.31.1.1</b>  | e-108 | <a href="#">P60782</a> | 8 | unknown                       |
| YP_002404986.1 | + | + | + | + | + | + | + | + | <b>9.B.32.1.1</b>  | e-68  | <a href="#">P32108</a> | 8 | unknown                       |
| YP_002404971.1 | + | - | - | - | + | - | + | + | <b>9.B.32.1.2</b>  | e-59  | <a href="#">P0ADK5</a> | 4 | unknown                       |
| YP_859761.1    | - | - | + | + | - | - | - | - | <b>9.B.33.1.1</b>  | e-18  | <a href="#">Q81JL2</a> | 2 | unknown                       |
| YP_002403404.1 | + | + | + | + | + | + | + | + | <b>9.B.33.1.1</b>  | e-72  | <a href="#">Q81JL2</a> | 8 | unknown                       |
| YP_002403690.1 | + | + | + | + | + | + | + | + | <b>9.B.33.1.1</b>  | e-77  | <a href="#">Q81JL2</a> | 8 | unknown                       |
| YP_002403895.1 | + | + | + | + | + | + | + | + | <b>9.B.34.1.1</b>  | e-11  | <a href="#">Q1J0W6</a> | 8 | unknown                       |
| YP_002403357.1 | + | + | + | + | + | + | - | + | <b>9.B.34.1.1</b>  | e-11  | <a href="#">Q1J0W6</a> | 7 | unknown                       |
| YP_002403012.1 | + | + | + | + | + | + | + | + | <b>9.B.34.1.1</b>  | e-12  | <a href="#">Q1J0W6</a> | 8 | unknown                       |
| YP_002403020.1 | + | + | + | + | + | + | + | + | <b>9.B.34.1.1</b>  | e-12  | <a href="#">Q1J0W6</a> | 8 | unknown                       |
| YP_002402528.1 | + | + | + | + | + | + | - | + | <b>9.B.34.1.1</b>  | e-14  | <a href="#">Q1J0W6</a> | 7 | unknown                       |
| YP_002403011.1 | + | + | + | + | + | + | + | + | <b>9.B.34.1.1</b>  | e-15  | <a href="#">Q1J0W6</a> | 8 | unknown                       |
| YP_002402727.1 | + | + | + | + | + | + | + | + | <b>9.B.34.1.1</b>  | e-16  | <a href="#">Q1J0W6</a> | 8 | unknown                       |
| YP_002401975.1 | + | + | + | + | + | + | + | + | <b>9.B.34.1.1</b>  | e-17  | <a href="#">Q1J0W6</a> | 8 | unknown                       |
| YP_006106274.1 | - | + | + | + | + | + | + | + | <b>9.B.34.1.1</b>  | e-18  | <a href="#">Q1J0W6</a> | 7 | unknown                       |
| YP_002401513.1 | + | + | + | + | + | + | + | + | <b>9.B.34.1.1</b>  | e-18  | <a href="#">Q1J0W6</a> | 8 | unknown                       |
| YP_002402583.1 | + | + | + | + | + | + | + | + | <b>9.B.34.1.1</b>  | e-19  | <a href="#">Q1J0W6</a> | 8 | unknown                       |
| YP_002402745.1 | + | + | + | + | + | + | + | + | <b>9.B.34.1.1</b>  | e-19  | <a href="#">Q1J0W6</a> | 8 | unknown                       |
| YP_006105155.1 | - | + | + | + | + | - | + | + | <b>9.B.34.1.1</b>  | e-20  | <a href="#">Q1J0W6</a> | 7 | unknown                       |
| YP_002402694.1 | + | - | - | - | + | + | + | + | <b>9.B.34.1.1</b>  | e-21  | <a href="#">Q1J0W6</a> | 5 | unknown                       |
| YP_002401910.1 | + | - | - | - | + | - | - | - | <b>9.B.34.1.1</b>  | e-21  | <a href="#">Q1J0W6</a> | 2 | unknown                       |
| YP_002403242.1 | + | + | + | + | + | + | + | + | <b>9.B.35.2.1</b>  | e-15  | <a href="#">O32142</a> | 8 | putative amine<br>(thyroxine) |
| YP_002404887.1 | + | + | + | + | + | + | + | + | <b>9.B.36.1.1</b>  | e-85  | <a href="#">P0AET5</a> | 8 | unknown                       |
| YP_002404867.1 | + | + | + | + | + | + | + | + | <b>9.B.4.1.1</b>   | e-63  | <a href="#">P0A8S5</a> | 8 | unknown                       |

1  
2  
3  
4  
5  
6  
7  
8  
9  
10  
11  
12  
13  
14  
15  
16  
17  
18  
19  
20  
21  
22  
23  
24  
25  
26  
27  
28  
29  
30  
31  
32  
33  
34  
35  
36  
37  
38  
39  
40  
41  
42  
43  
44  
45  
46  
47  
48  
49

|                |   |   |   |   |   |   |   |   |            |       |                        |   |                          |
|----------------|---|---|---|---|---|---|---|---|------------|-------|------------------------|---|--------------------------|
| YP_006105896.1 | - | + | - | - | - | - | - | - | 9.B.42.1.1 | e-10  | <a href="#">P45754</a> | 1 | unknown                  |
| YP_858923.1    | - | - | + | - | - | - | - | - | 9.B.42.1.1 | e-15  | <a href="#">P45754</a> | 1 | unknown                  |
| YP_006107716.1 | - | + | - | + | - | - | - | + | 9.B.42.1.1 | e-25  | <a href="#">P45754</a> | 3 | unknown                  |
| YP_002403244.1 | + | + | + | + | + | + | + | + | 9.B.43.1.1 | e-97  | <a href="#">Q8XB73</a> | 8 | unknown                  |
| YP_002404946.1 | + | + | + | + | + | + | + | + | 9.B.44.1.1 | e-59  | <a href="#">P11286</a> | 8 | unknown                  |
| YP_002404945.1 | + | + | + | + | + | + | + | + | 9.B.44.1.1 | e-79  | <a href="#">P0ADJ8</a> | 8 | unknown                  |
| YP_001462755.1 | - | - | - | - | + | - | - | - | 9.B.49.1.2 | e-131 | <a href="#">Q81E21</a> | 1 | monocarboxylate          |
| YP_006108725.1 | - | + | + | + | - | - | - | - | 9.B.50.1.2 | e-147 | <a href="#">Q11G42</a> | 3 | dicarboxylate            |
| YP_002403564.1 | + | + | + | + | + | + | + | + | 9.B.50.1.2 | e-64  | <a href="#">Q11G42</a> | 8 | dicarboxylate            |
| YP_002401706.1 | + | + | + | + | + | + | + | + | 9.B.59.1.1 | 0     | <a href="#">P15078</a> | 8 | putative peptide         |
| YP_002405859.1 | + | + | + | + | + | + | + | + | 9.B.59.1.1 | 0     | <a href="#">P15078</a> | 8 | putative peptide         |
| YP_002328941.1 | - | - | - | - | - | - | - | + | 9.B.6.1.1  | e-15  | <a href="#">P0ACG4</a> | 1 | unknown                  |
| YP_002328942.1 | - | - | - | - | - | - | - | + | 9.B.6.1.1  | e-18  | <a href="#">P0ACG4</a> | 1 | unknown                  |
| YP_002327608.1 | - | - | - | - | - | - | - | + | 9.B.6.1.1  | e-22  | <a href="#">P0ACG4</a> | 2 | unknown                  |
| YP_002327609.1 | - | - | - | - | - | - | - | + | 9.B.6.1.1  | e-22  | <a href="#">P0ACG4</a> | 1 | unknown                  |
| YP_002404840.1 | + | - | - | - | - | - | - | - | 9.B.62.1.1 | e-154 | <a href="#">Q47455</a> | 1 | putative copper          |
| YP_002403073.1 | + | + | + | + | + | + | + | + | 9.B.62.1.2 | e-19  | <a href="#">P12377</a> | 8 | putative copper          |
| YP_858992.1    | - | - | + | - | - | - | - | + | 9.B.65.1.1 | 0     | <a href="#">P45804</a> | 3 | putative transporter     |
| YP_002414511.1 | - | - | - | - | - | - | - | + | 9.B.65.1.1 | 0     | <a href="#">P45804</a> | 2 | putative transporter     |
| YP_002404749.1 | + | - | - | - | + | - | - | + | 9.B.65.1.1 | 0     | <a href="#">P45804</a> | 3 | putative transporter     |
| YP_006107791.1 | - | + | - | + | - | - | - | - | 9.B.65.1.1 | 0     | <a href="#">P45804</a> | 2 | putative transporter     |
| NP_754452.1    | - | - | - | + | - | - | - | - | 9.B.67.3.2 | e-10  | <a href="#">A7V2W2</a> | 1 | unknown                  |
| YP_006108029.1 | - | + | + | + | + | - | - | - | 9.B.67.5.1 | e-37  | <a href="#">P27243</a> | 4 | unknown                  |
| YP_002403716.1 | + | + | + | + | + | + | + | + | 9.B.7.1.1  | e-151 | <a href="#">P0A6J3</a> | 8 | putative anion transport |
| YP_002401732.1 | + | + | + | + | + | + | + | + | 9.B.71.1.1 | e-69  | <a href="#">P37002</a> | 8 | unknown                  |
| YP_002402836.1 | + | + | + | + | + | + | + | + | 9.B.72.1.1 | e-25  | <a href="#">P52112</a> | 8 | putative monocarboxylate |
| YP_002403753.1 | + | + | + | + | + | + | + | + | 9.B.75.2.1 | e-131 | <a href="#">P76555</a> | 8 | amino acid               |
| YP_002405676.1 | + | + | + | + | + | + | + | + | 9.B.93.1.1 | e-174 | <a href="#">P0AF98</a> | 8 | putative transporter     |
| YP_002404356.1 | + | + | + | + | + | + | - | - | 9.B.93.1.2 | e-169 | <a href="#">E1IMB6</a> | 6 | putative transporter     |
| YP_002404944.1 | + | + | + | + | + | + | + | + | 9.B.97.1.1 | e-177 | <a href="#">P37669</a> | 8 | cofactor substrate       |

1  
2  
3  
4  
5  
6  
7  
8  
9  
10  
11  
12  
13  
14  
15  
16  
17  
18  
19  
20  
21  
22  
23  
24  
25  
26  
27  
28  
29  
30  
31  
32  
33  
34  
35  
36  
37  
38  
39  
40  
41  
42  
43  
44  
45  
46  
47  
48  
49

|             |   |   |   |   |   |   |   |   |            |      |                        |   |                      |
|-------------|---|---|---|---|---|---|---|---|------------|------|------------------------|---|----------------------|
| NP_752900.1 | - | - | - | + | - | - | - | - | 9.B.97.1.3 | e-16 | <a href="#">Q2NEN2</a> | 1 | putative transporter |
|-------------|---|---|---|---|---|---|---|---|------------|------|------------------------|---|----------------------|

## 7. Figure Legends

Figure 1. Distribution of transport proteins according to TC class (top) & TC subclass (bottom) for *E. coli* K12 str. MG1655 (top) and the seven pathogenic strains combined (bottom). Similar distributions for the eight *E. coli* strains individually and combined are presented in supplementary figures S1A-S1I.

Figure 2. Total number of proteins associated with iron transport in the eight *E. coli* strains in which (A) shows the relationship between the serovars (x-axis) and number of iron-siderophore transporters (y-axis). The OMR-type transporters are represented in dark gray while the ABC iron-siderophore uptake porters are presented in light gray. (B) Correlation between iron-sequestering OMRs (x-axis) and ABC iron-uptake transporters (y-axis) for the eight strains of *E. coli* examined. The best-fit line has a slope of 1.85 and a  $R^2$  value is 0.90.

Figure 3. Schematic view of an *E. coli* cell showing transport proteins of particular importance for pathogenesis. All *E. coli* cells have the same secondary carriers for iron uptake which therefore do not play a specific role in pathogenesis (center left). Systems preferentially present in pathogens (top) often lacking in *E. coli* K12, include pro-toxins, ABC-type iron uptake systems which are proposed to function with their iron-specific outer membrane receptors (OMRs), transenvelope protein secretion systems types 1-6 and autotransporters of the types AT1-3 transporters specifically found in extracellular versus intracellular pathogens are illustrated in the bottom right and left, respectively. See text for details.



1  
2  
3  
4  
5  
6  
7  
8  
9  
10  
11  
12  
13  
14  
15  
16  
17  
18  
19  
20  
21  
22  
23  
24  
25  
26  
27  
28  
29  
30  
31  
32  
33  
34  
35  
36  
37  
38  
39  
40  
41  
42  
43  
44  
45  
46  
47  
48  
49  
50  
51  
52  
53  
54  
55  
56  
57  
58  
59  
60  
61  
62  
63  
64  
65

Figure S1. Distribution of transport proteins organized according to TC class (left) & TC subclass (right) for each strain examined: (A) *E. coli* 559, (B) ABU, (C) APE, (D) CFT, (E) E24, (F) UMN, (G) O15, (H) K12 and (I) all eight strains.

Dear Dr. Gorvel,

Thank you for the second editorial review of our manuscript. We were pleased that reviewer #1 was happy with the revisions made, but are particularly grateful to reviewer #2 for the further useful suggestions for improvement. We have attempted to satisfy all of the criticisms cited in the letter, and we will go through these point by point to mention how we have modified the manuscript in accordance with these suggestions.

Major revisions (Reviewer #2):

- (1) A complete legend describing Figure 3 has now been provided. Additionally, in the previous revised manuscript, Table 1 had been modified to alter the APEC O1 designation from ExPEC to AIEC, and this convention has been used throughout the paper. In Table 6, we have now deleted the statement “energy-transducing systems” for both TonB and TolA. In the previous revision of the manuscript, we did remove Table 8 and combined Figures 2 and 3, as stated in our covering letter. Complete descriptions of all figures can be found on the figure legends page. We apologize for not having previously corrected reference to Table S2 (which is no longer referred to in the text), and we have referred to Table S1 both at the end of the methods section and the beginning of the results section.
- (2) The reviewer’s second major concern deals with our treatment of OMR energizers. We have corrected the text to state that TonB and not TolA play a role in OMR function. We have further clarified the occurrences of Tol complexes, mentioning not only the number of TolA homologs in the different strains, but also referring to all of the constituents of this complex (See section 3.2.4). We have also provided the relevant references suggested by Reviewer #2.
- (3) The colors presented in Tables S1 and 8 are now explained.
- (4) The reference cited (Reddy and Saier, 2012) provides detailed information about the programs used, but in the methods section, we have also described how these programs have been used for the current studies. As mentioned, orthologous relationships are defined by a cutoff of 95% identity except in rare instances when sequence divergence was more extensive.
- (5) Reviewer #2 is absolutely correct; the number of unique transport proteins present in the pathogenic strains but lacking in K12 is not 718, but 838. We have corrected this mistake in section 3.1.1.

We thank you and the reviewers for the careful review of our revised manuscript. In fact, we are so grateful that we would like to acknowledge his or her contribution in the acknowledgement section. We hope these revisions render our paper suitable for publication in *Microbial Pathogenesis*. If further improvements are desired, we will be happy to modify the manuscript further.

Yours sincerely,

Fengyi (Andy) Tang and Milton H. Saier, Jr.

### Distribution of transport proteins in E. coli K12 organized by class

A

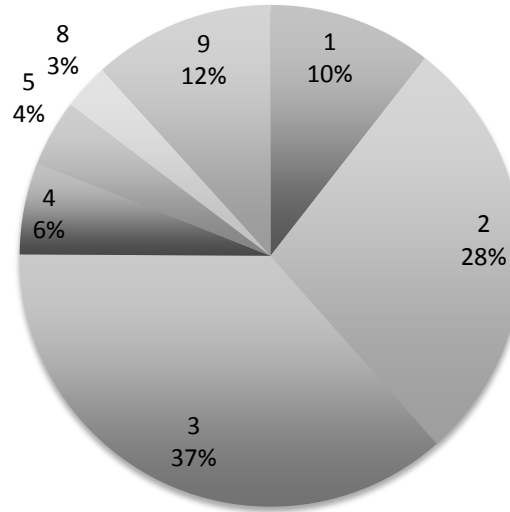

### Distribution of Transport Proteins in E. Coli K 12 Organized by Subclass

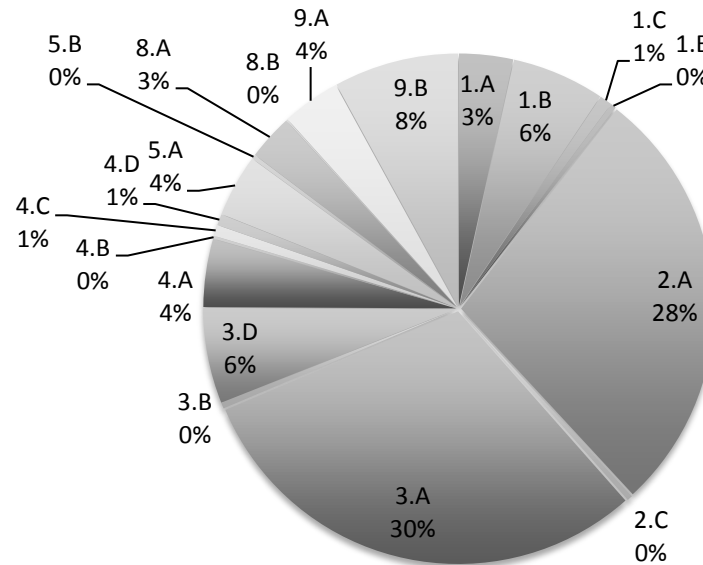

Figure 1

**Distribution of combined transport proteins exclusively  
in seven pathogenic strains organized by TC class**

**B**

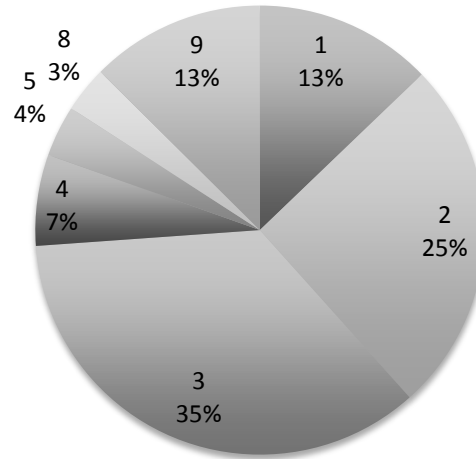

**Distribution of combined transport proteins  
exclusively in seven pathogenic strains organized  
by TC subclass**

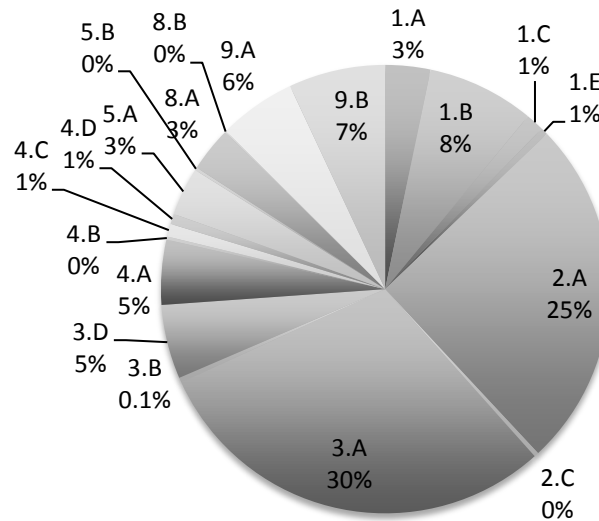

**Figure 1**

**Distribution of combined transporters in eight strains of *E. coli* organized by TC class**

**C**

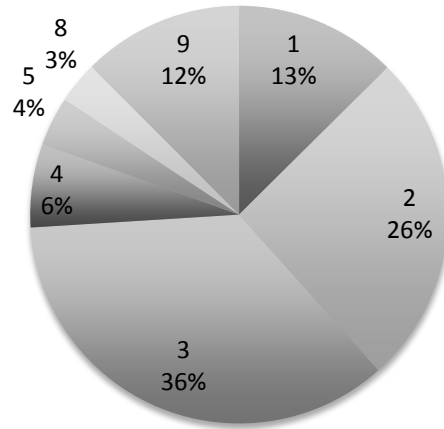

**Distribution of combined transporters in eight strains of *E. coli* organized by TC subclass**

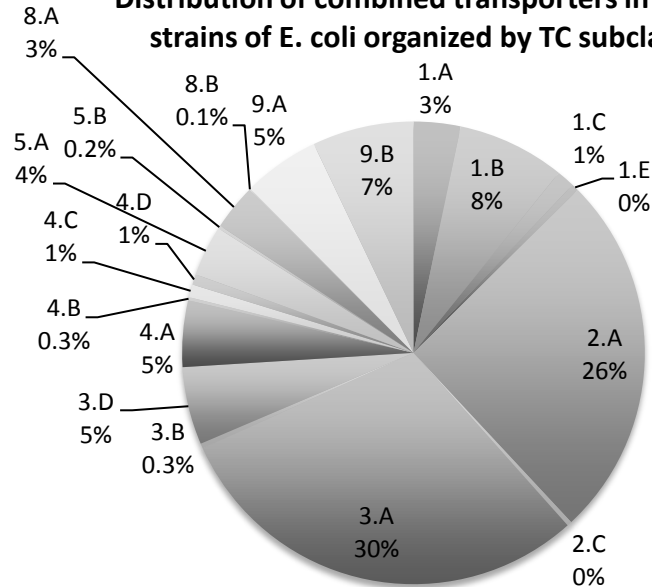

**Figure 1**

A

## Total number of transport proteins related to iron transport in the eight serovars

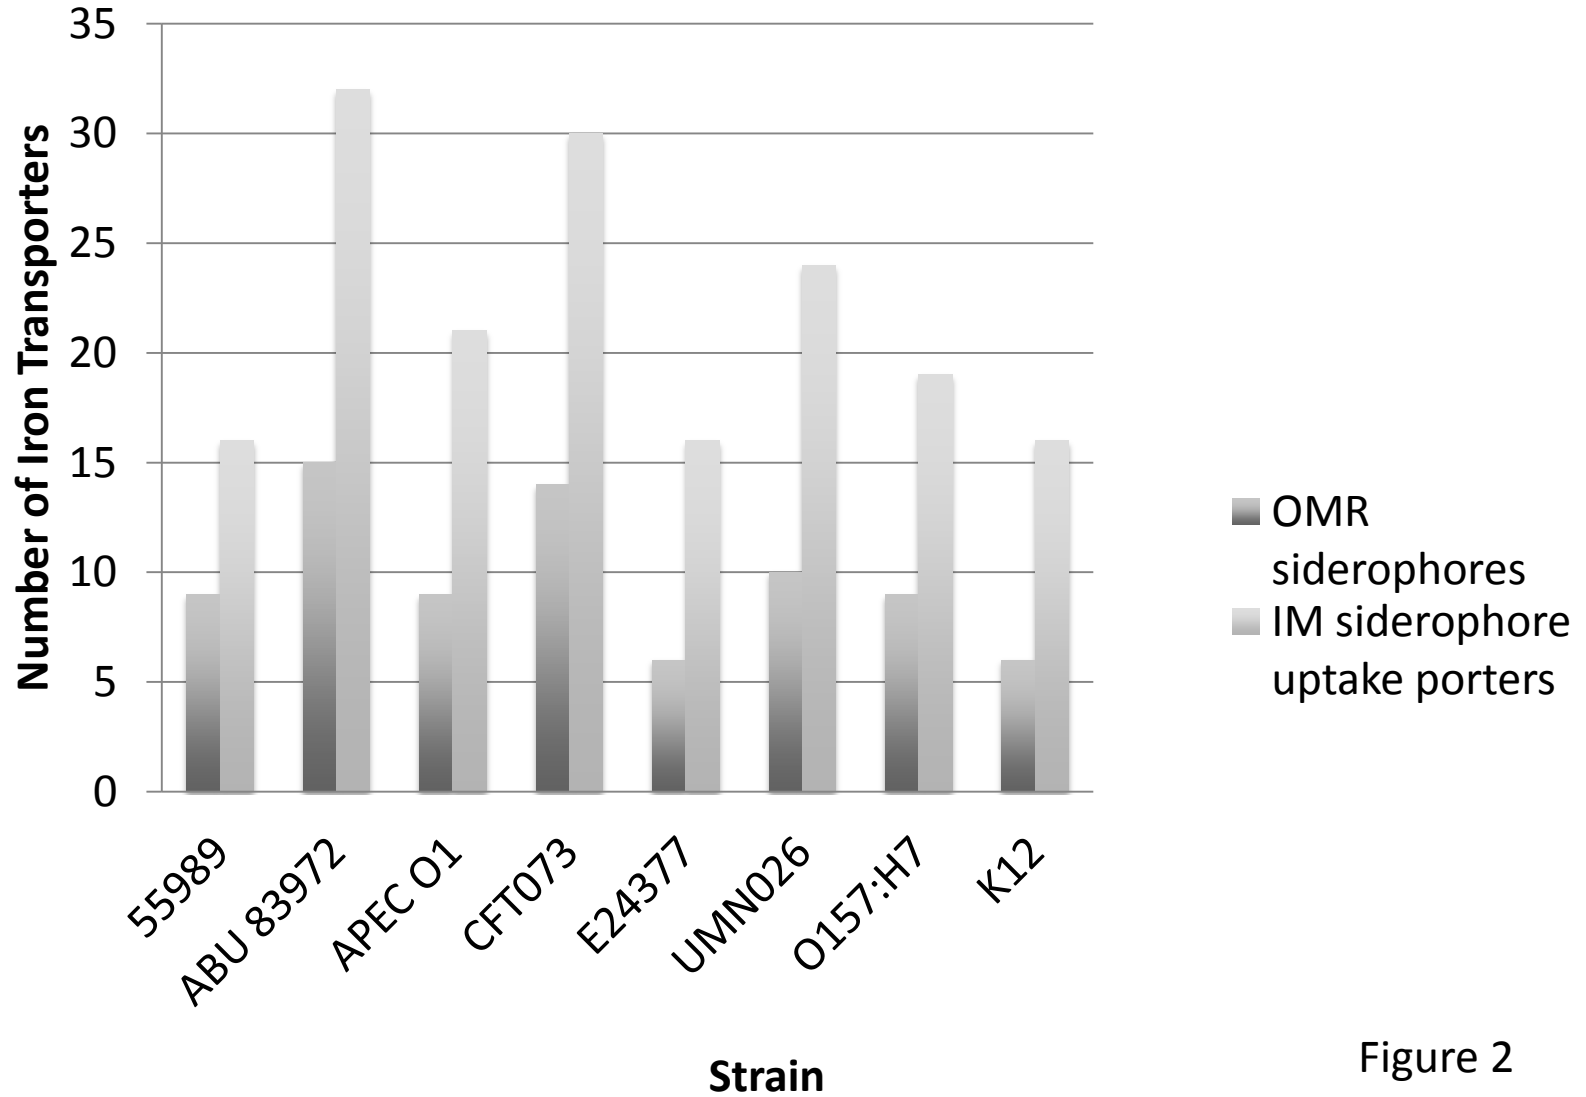

Figure 2

B

### Iron-sequestering OMR vs. Iron-uptake Transporters in the eight strains

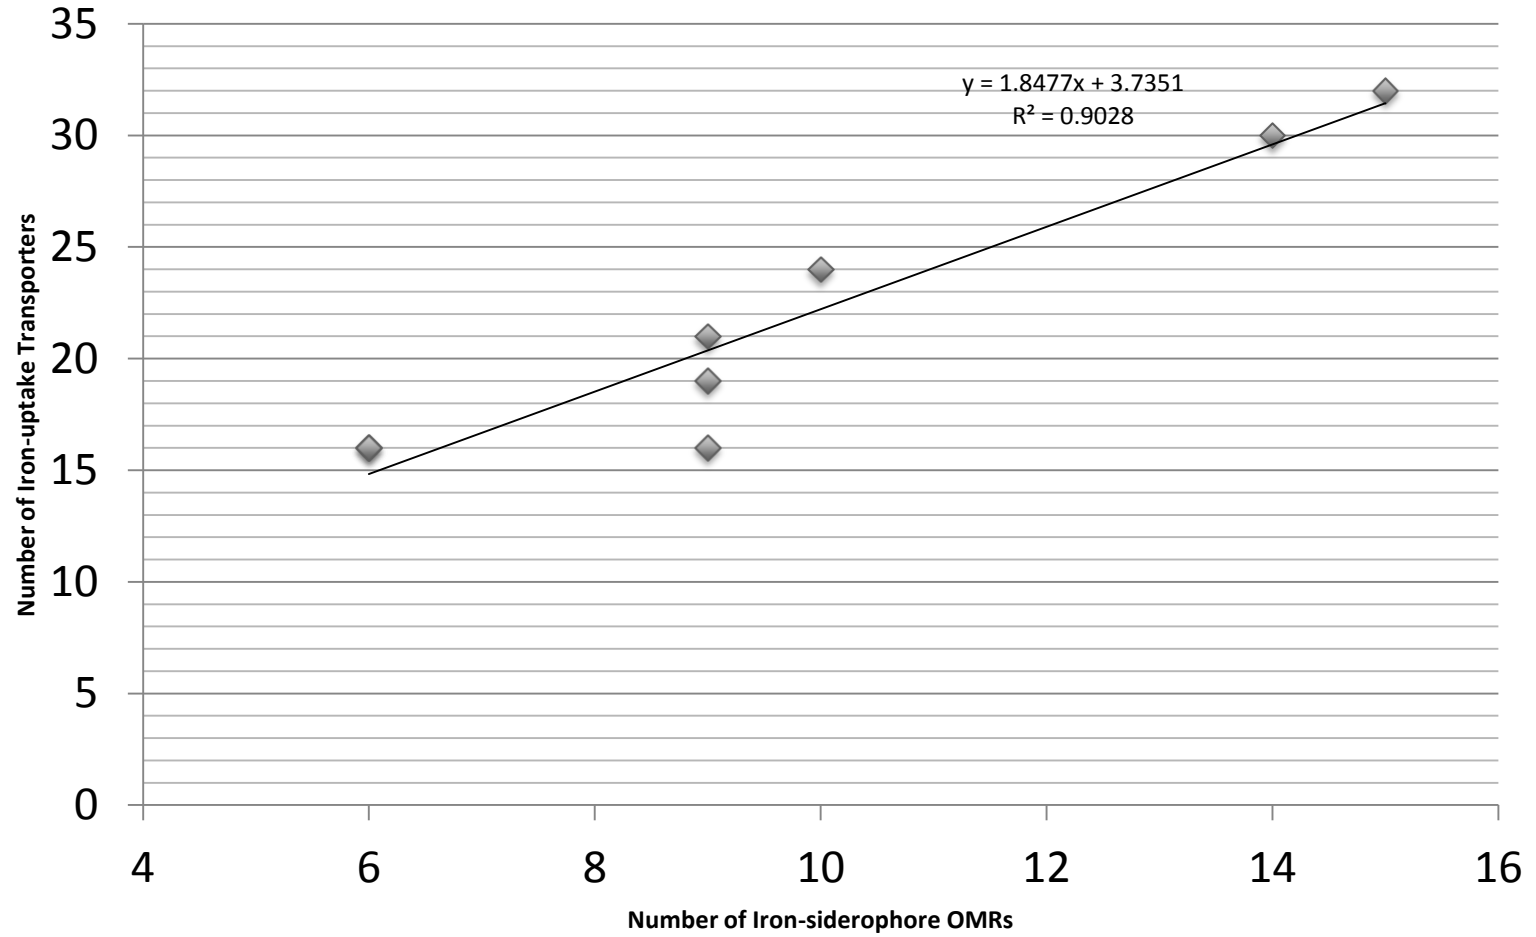

Figure 2

**Distribution of transport proteins in E. coli 55989  
organized by TC class**

**A**

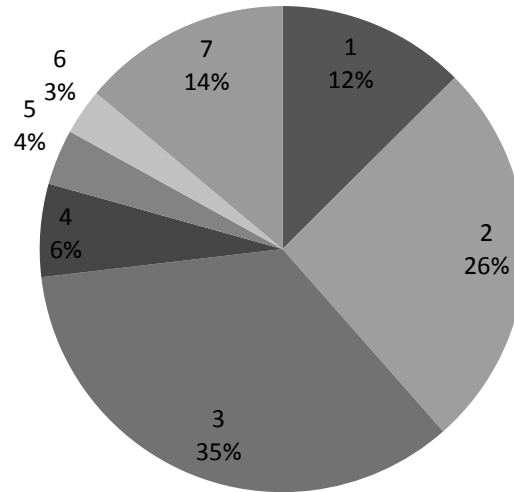

**Distribution of Transport proteins in E. coli 55989  
organized by TC subclass**

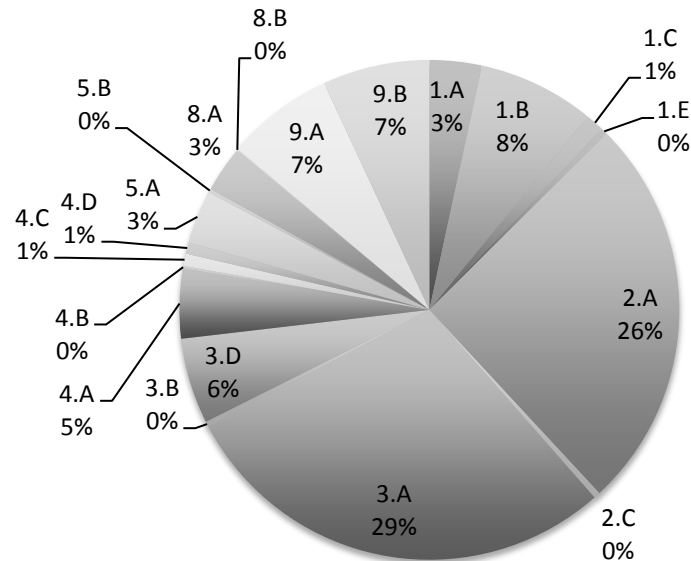

Figure S1



**Distribution of transport proteins in E. coli  
ABU 83972 organized by TC class**

**B**

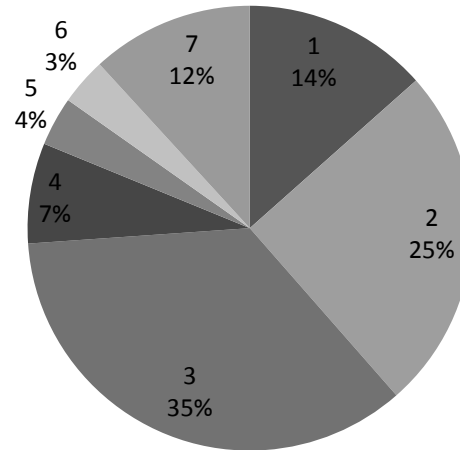

**Distribution of transport proteins in E. coli  
ABU 83972 organized by TC subclass**

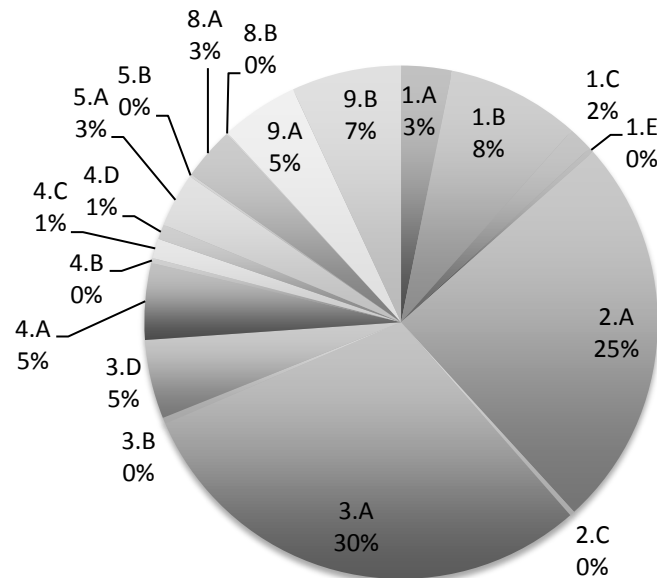

**Figure S1**

**Distribution of transport proteins in E. coli APEC O1  
organized by TC class**

**C**

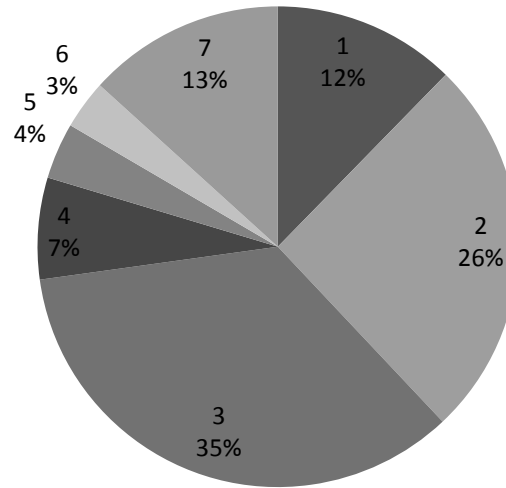

**Distribution of transport proteins in E. coli  
APEC O1 organized by TC subclass**

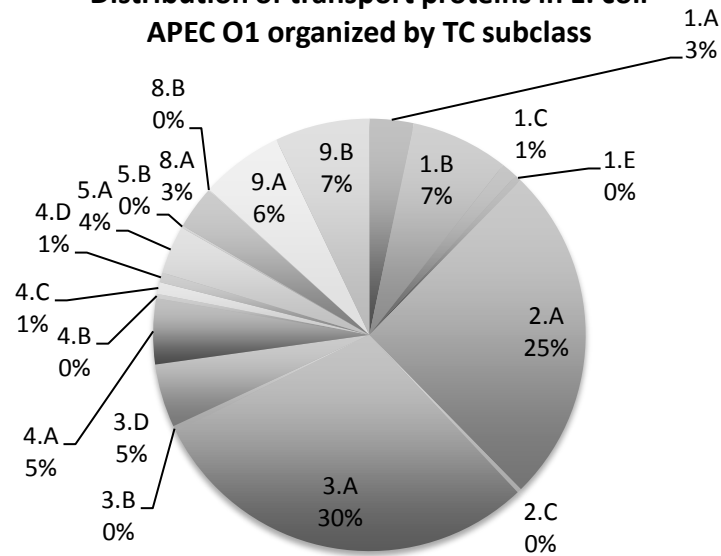

**Figure S1**

**Distribution of transport proteins in *E. coli* CFT073  
organized by TC class**

**D**

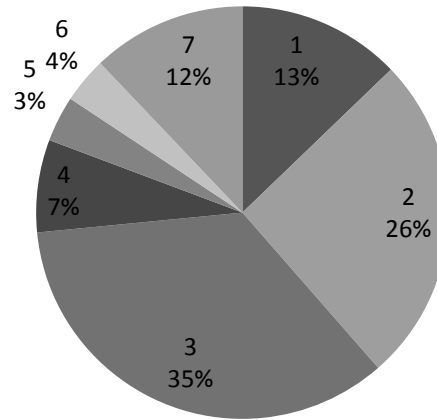

**Distribution of transport proteins in *E. coli* CFT073  
organized by TC subclass**

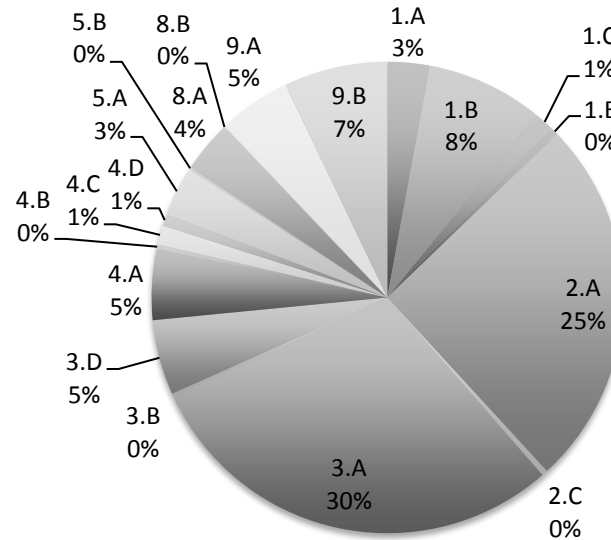

**Figure S1**

**Distribution of transport proteins in E. coli  
E24377A organized by TC class**

**E**

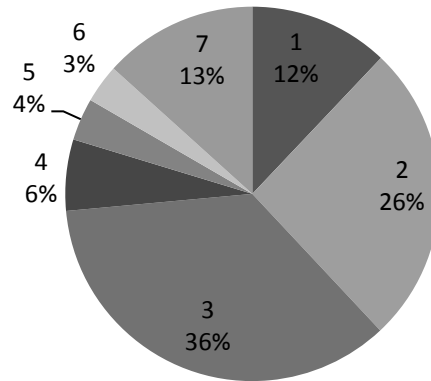

**Distribution of transport proteins in E. coli  
E24377A organized by TC subclass**

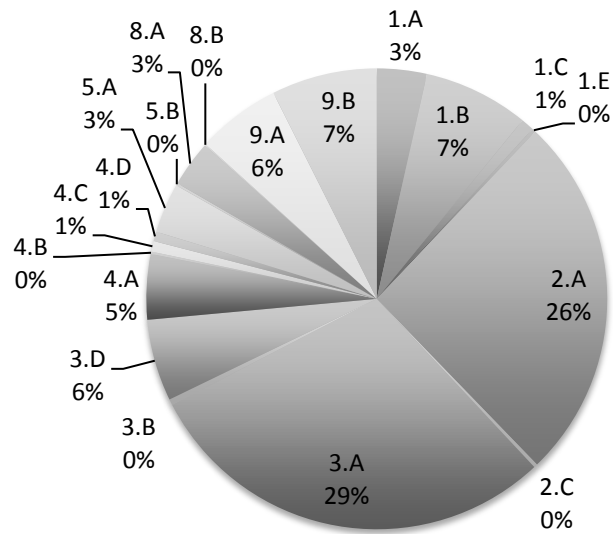

Figure S1

**Distribution of transport proteins in E. coli  
UMN026 organized by TC class**

**F**

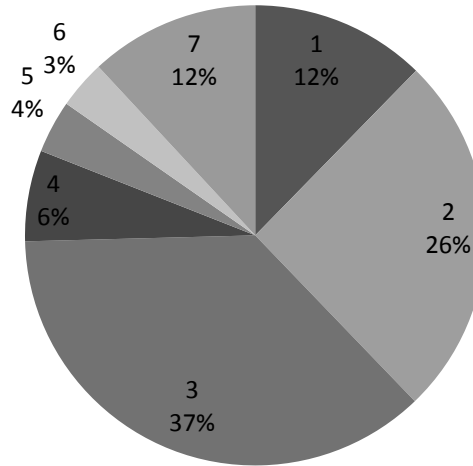

**Distribution of transport proteins in E. coli  
UMN026 organized by TC subclass**

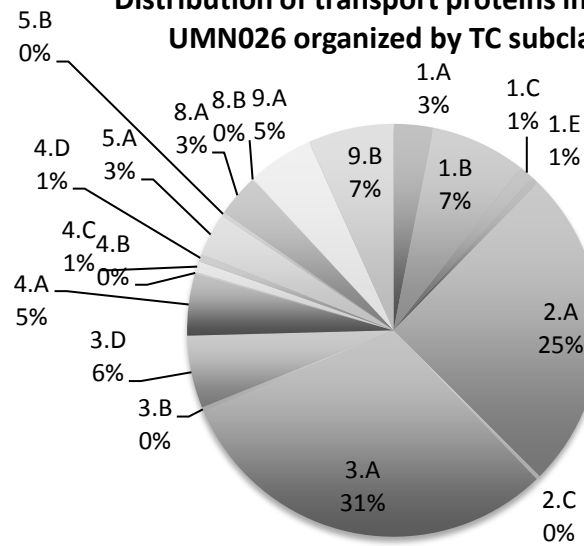

Figure S1

**Distribution of transport proteins in E. coli  
O157:H7 organized by TC class**

**G**

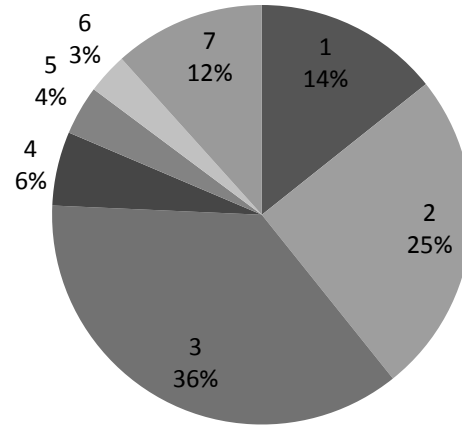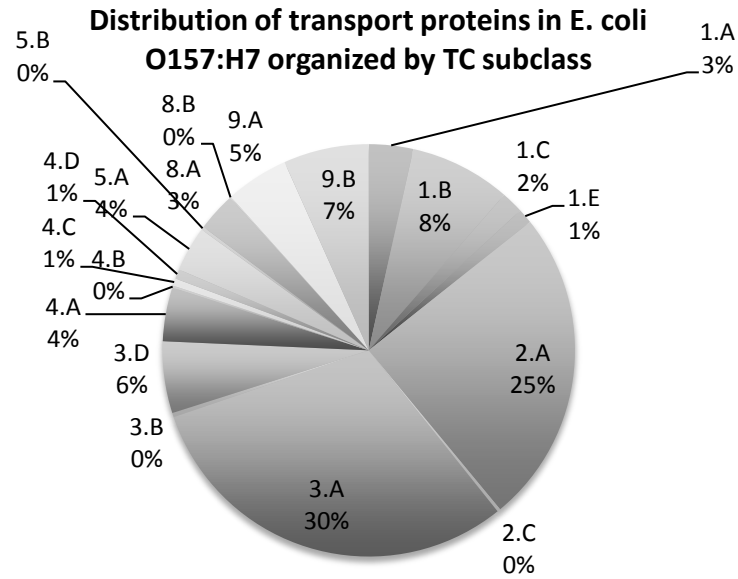

Figure S1

**Distribution of transport proteins in E. coli K12  
organized by class**

H

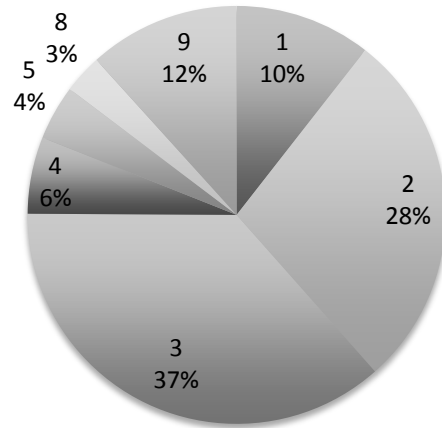

**Distribution of Transport Proteins in E. Coli K 12  
Organized by Subclass**

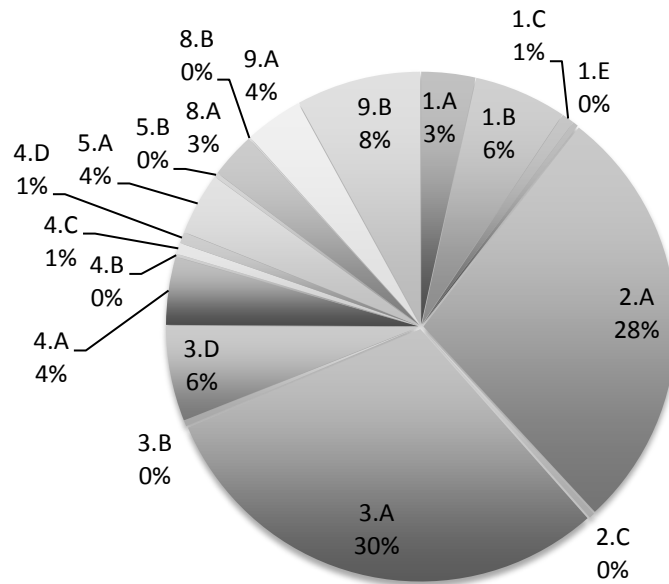

Figure S1

Figure

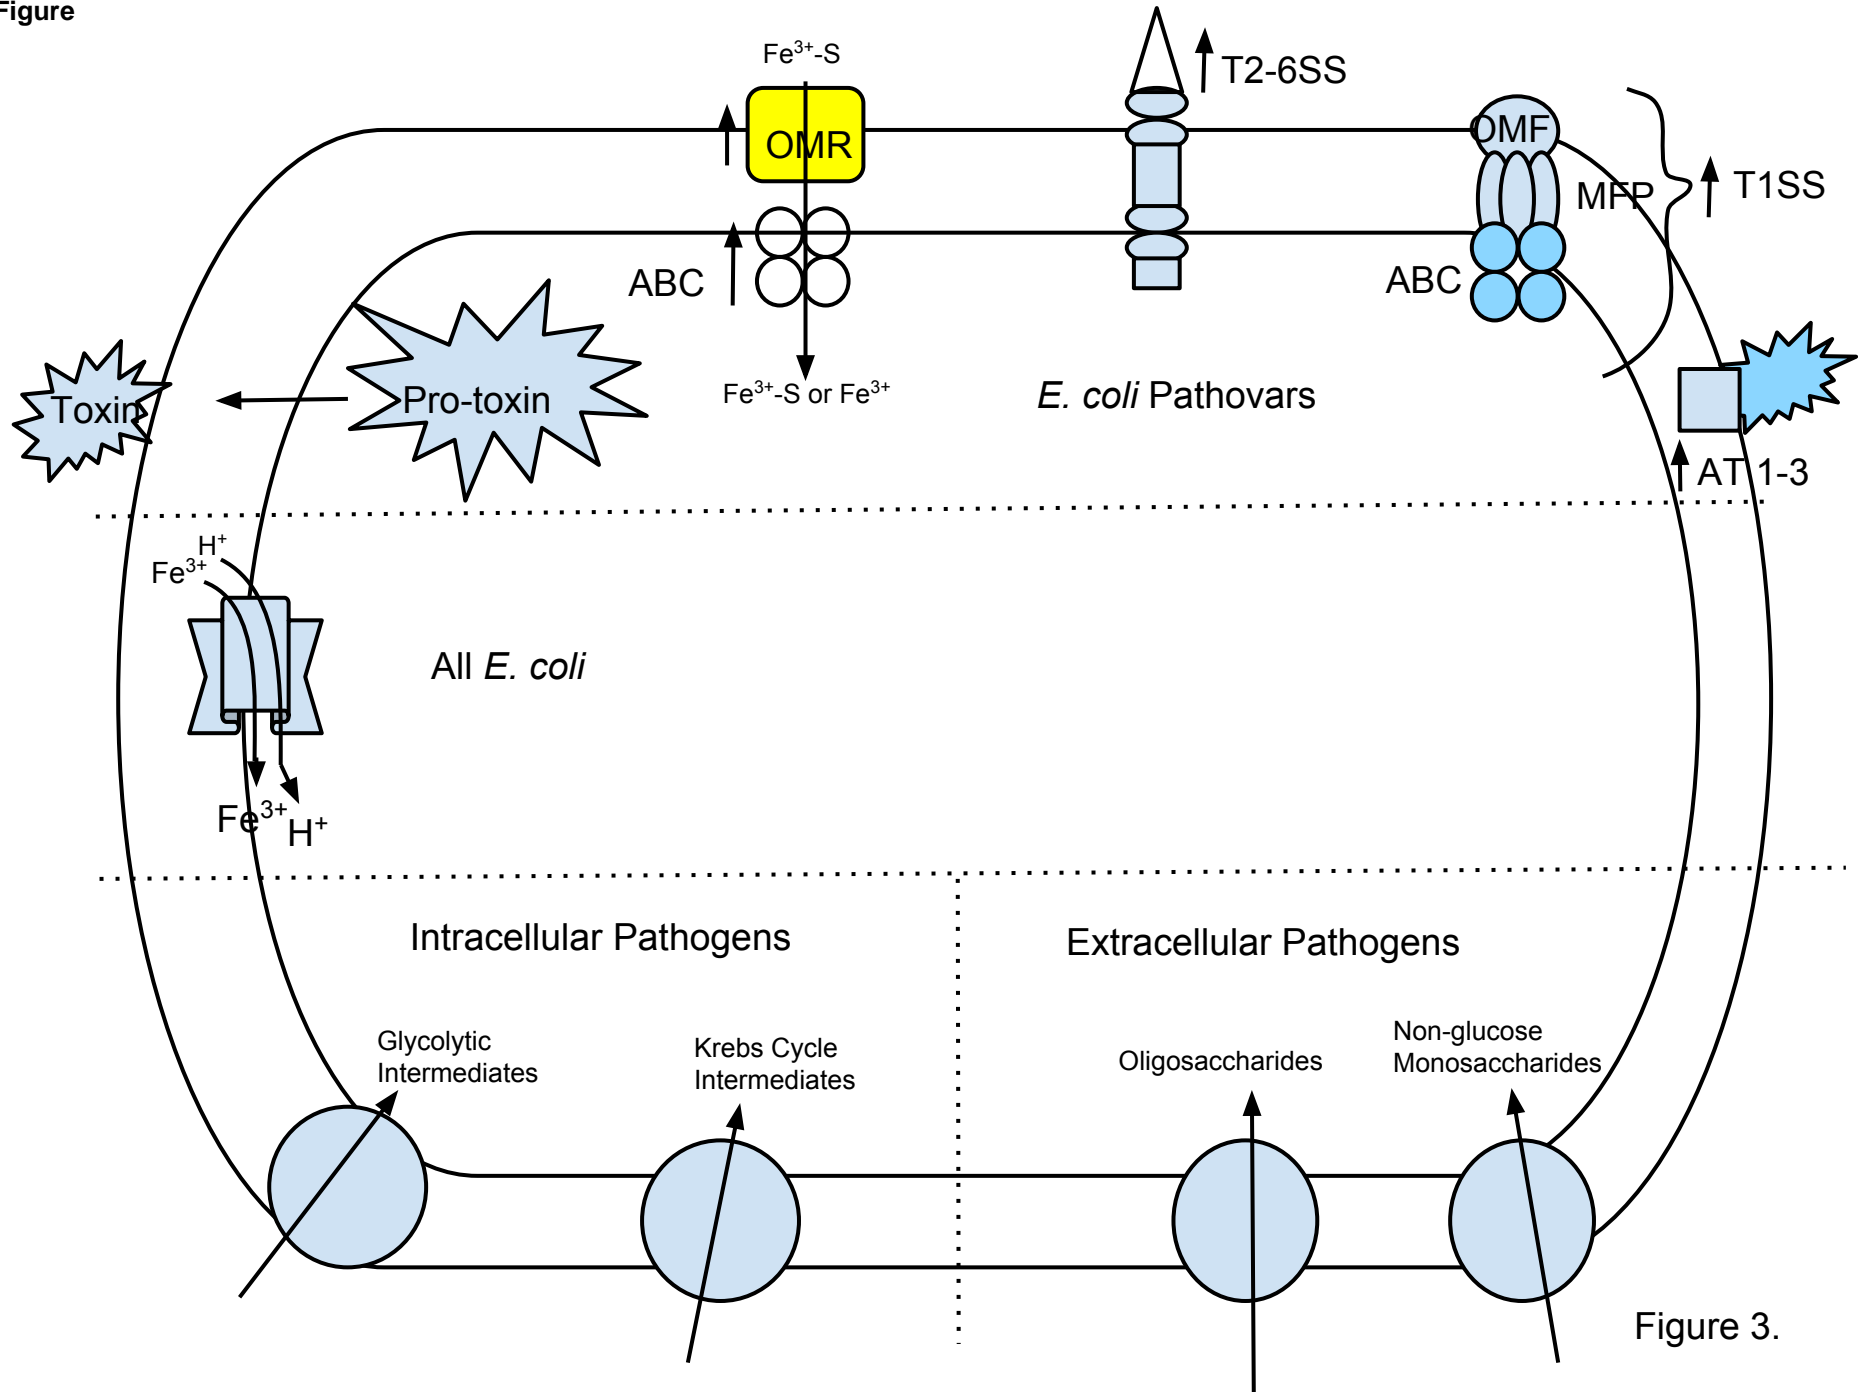

Figure 3.
